# Supplementary material for: Induction of Telomere Dysfunction Prolongs Disease Control of Therapy-Resistant Melanoma
Source: Oxford University Press journal article supplement (doi:10.1158/1078-0432.ccr-17-2773), 2018-03-21
Supplement: 10780432ccr172773-sup-189704_2_supp_4595947_p4tgtd.pdf [file 10780432ccr172773-sup-189704_2_supp_4595947_p4tgtd.pdf]

## Supplementary Figures and Tables

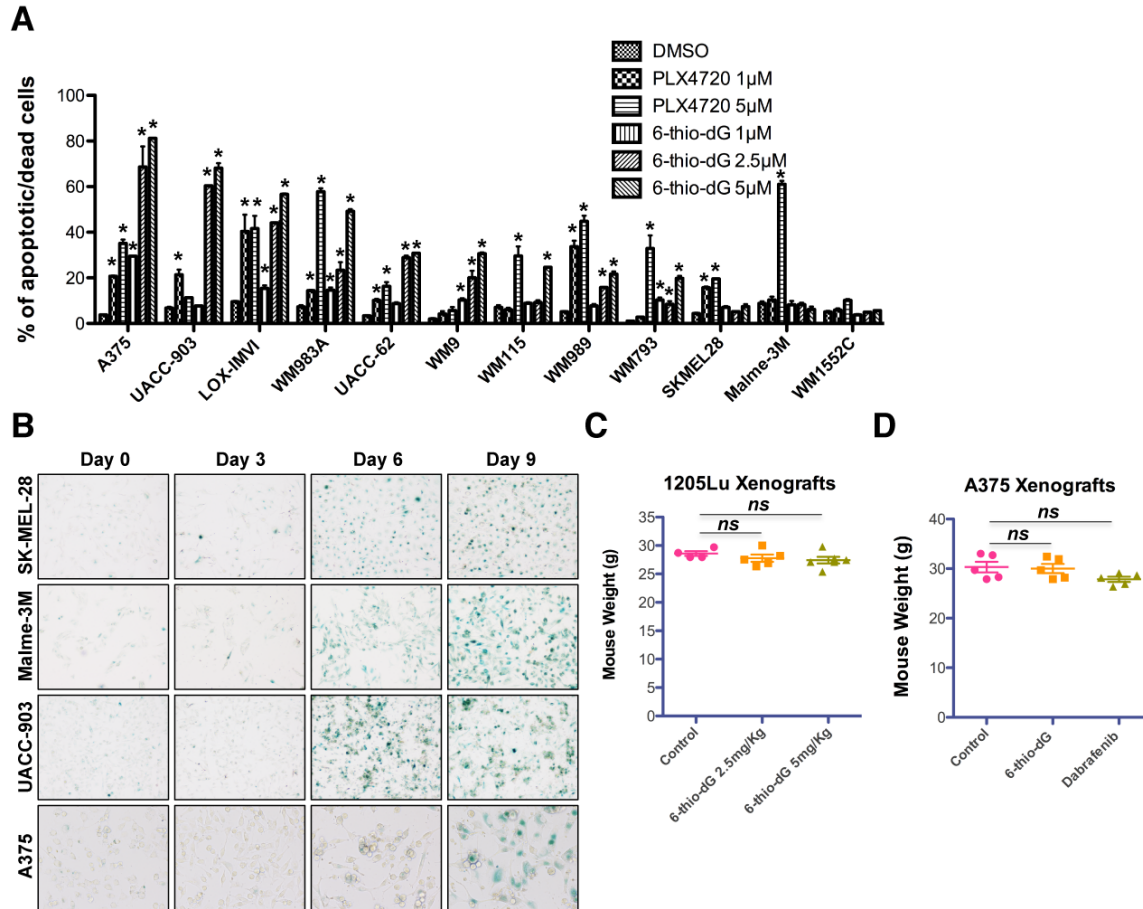

**Supplementary Fig. 1: Related to Fig. 2**

(A) The percentage of apoptotic and dead cells indicated as PSVue 643<sup>+</sup> cells in each of 12 *BRAF*-mutant melanoma cell lines treated with PLX4720 or 6-thio-dG at indicated doses for 120 hours. Cells were then harvested and co-stained with PSVue643 and Propidium iodide (PI). The average of 2 biological replicates was plotted. (B) SA-β-gal staining of 4 *BRAF*-mutant melanoma cell lines treated with 6-thio-dG at 5µM for 9 days. A representative image of 3 biological replicates was shown for each experimental sample. (C and D) Mouse weights of 1205Lu (C) and A375 (D) xenografts in each treatment group were shown.

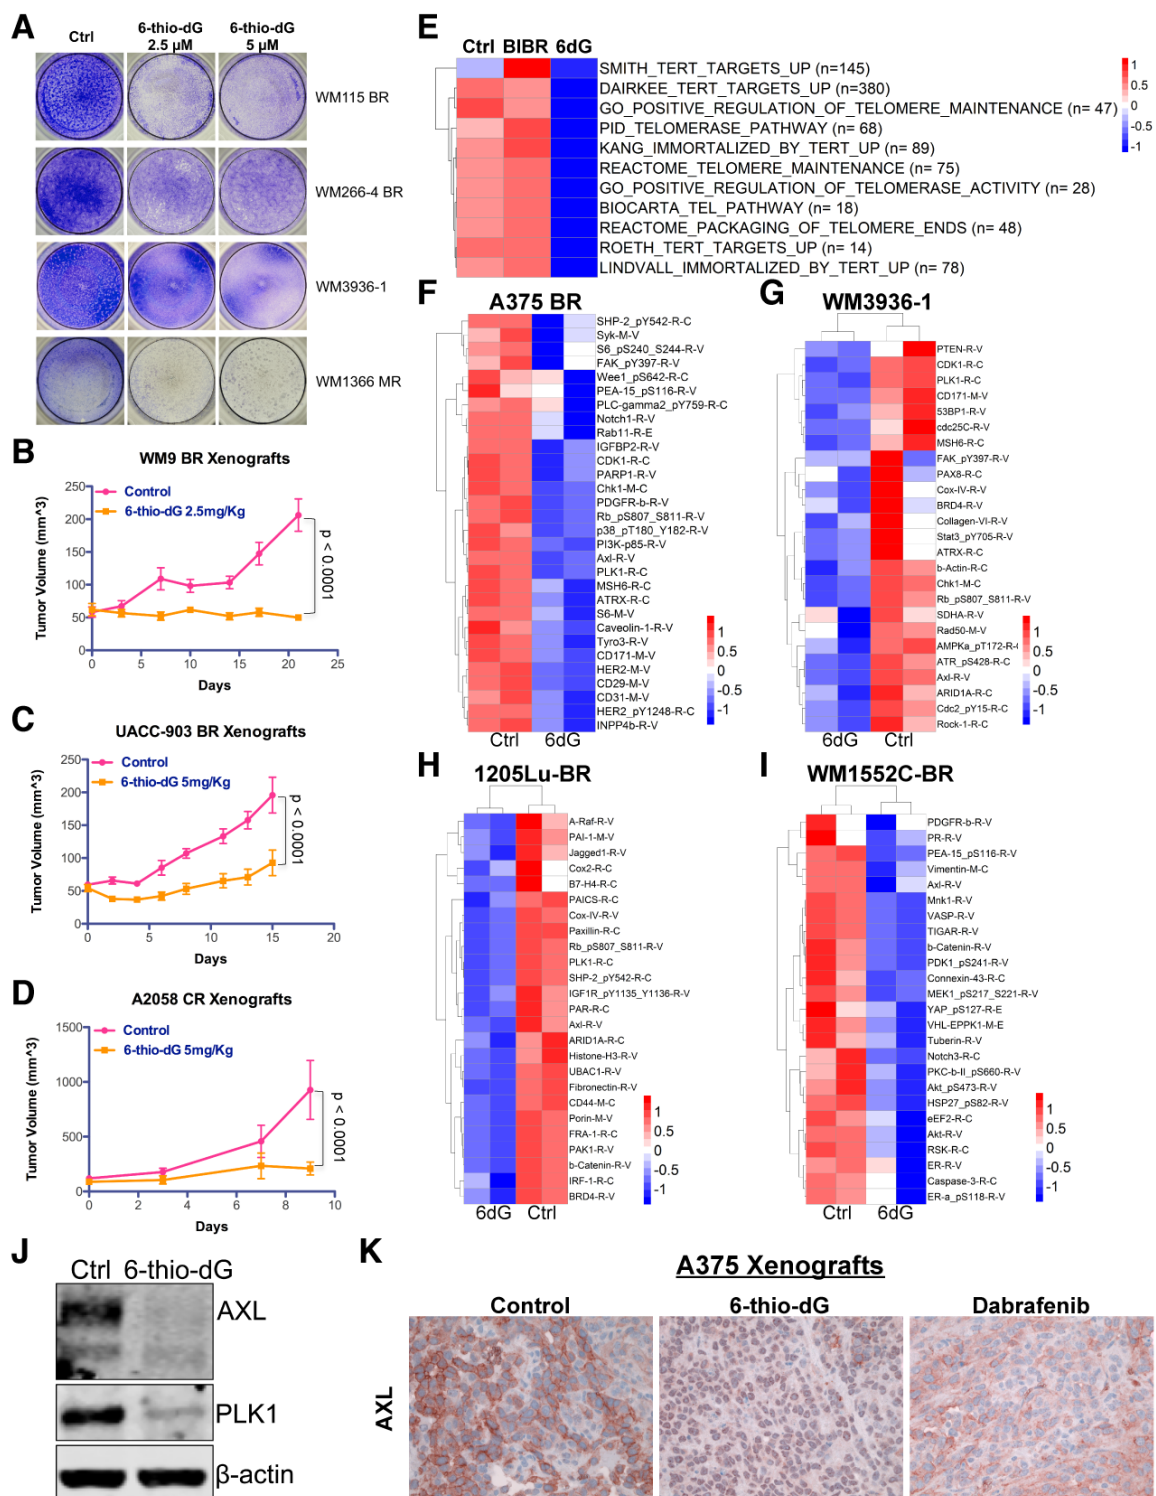

Supplementary Fig. 2: Related to Fig. 4

(A) Long-term cell growth assay of 4 melanoma cell lines that acquired resistance to MAPKi treated with 6-thio-dG at indicated doses for 12 days. Cells were then fixed and stained with

crystal violet. A representative image of 2 biological replicates was shown for each experimental condition. **(B-D)** Tumor volumes of WM9 BR **(B)**, UACC-903 BR **(C)** and A2058 CR **(D)** xenografts that were treated with the vehicle control and 6-thio-dG at indicated doses. **(E)** The ssGSEA plot of 11 MSigDB gene sets related to telomere and telomerase that were significantly altered in LOX-IMVI BR cells treated with BIBR 1532 (BIBR) or 6-thio-dG (6dG). **(F-I)** The heatmaps of RPPA data depicting 30 proteins that were most significantly down-regulated in four representative BR cell lines treated with 6-thio-dG, including A375 BR **(F)**, WM3936-1 **(G)**, 1205Lu BR **(H)** and WM1552C BR **(I)**. **(J)** Western blotting of proteins that were down-regulated in LOX-IMVI BR cells treated with 6-thio-dG (6dG). **(K)** The immunohistochemical analysis of AXL was performed in A375 tumors that were treated with the control, 6-thio-dG and Dabrafenib.

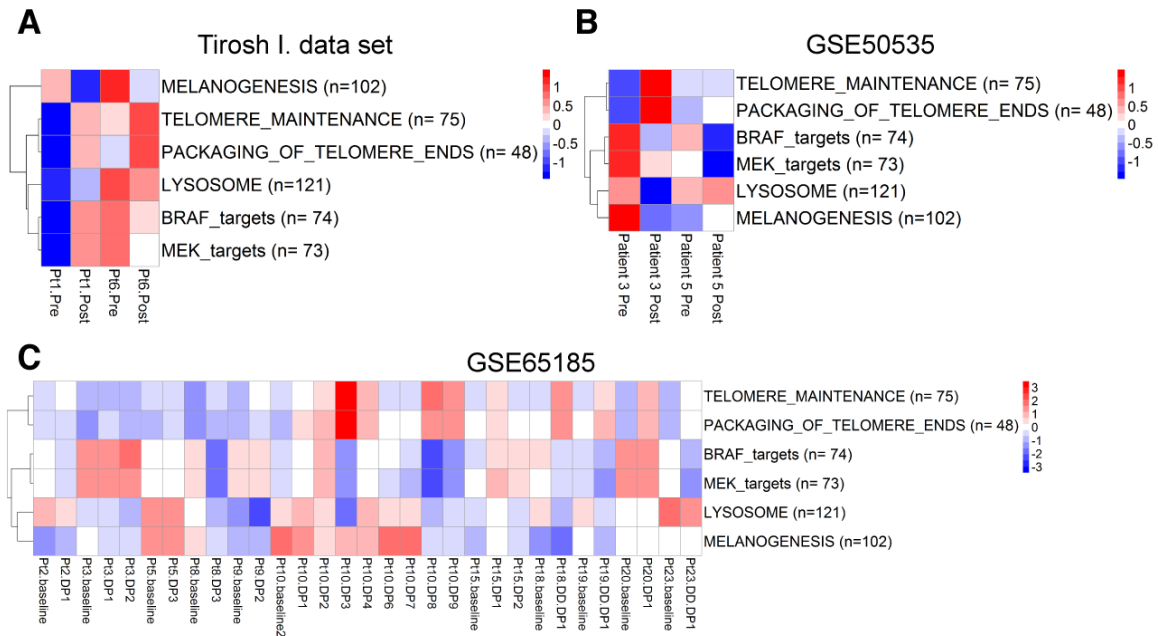

**Supplementary Fig. S3: Related to Fig. 5**

(A-C) The heatmaps of two telomere transcriptional gene signatures, two melanoma-specific gene sets and two MAPK pathway-related gene sets in three datasets in which transcriptomes of paired pre- and post-treatment tumor biopsies derived from patients who progressed on MAPKi were profiled.

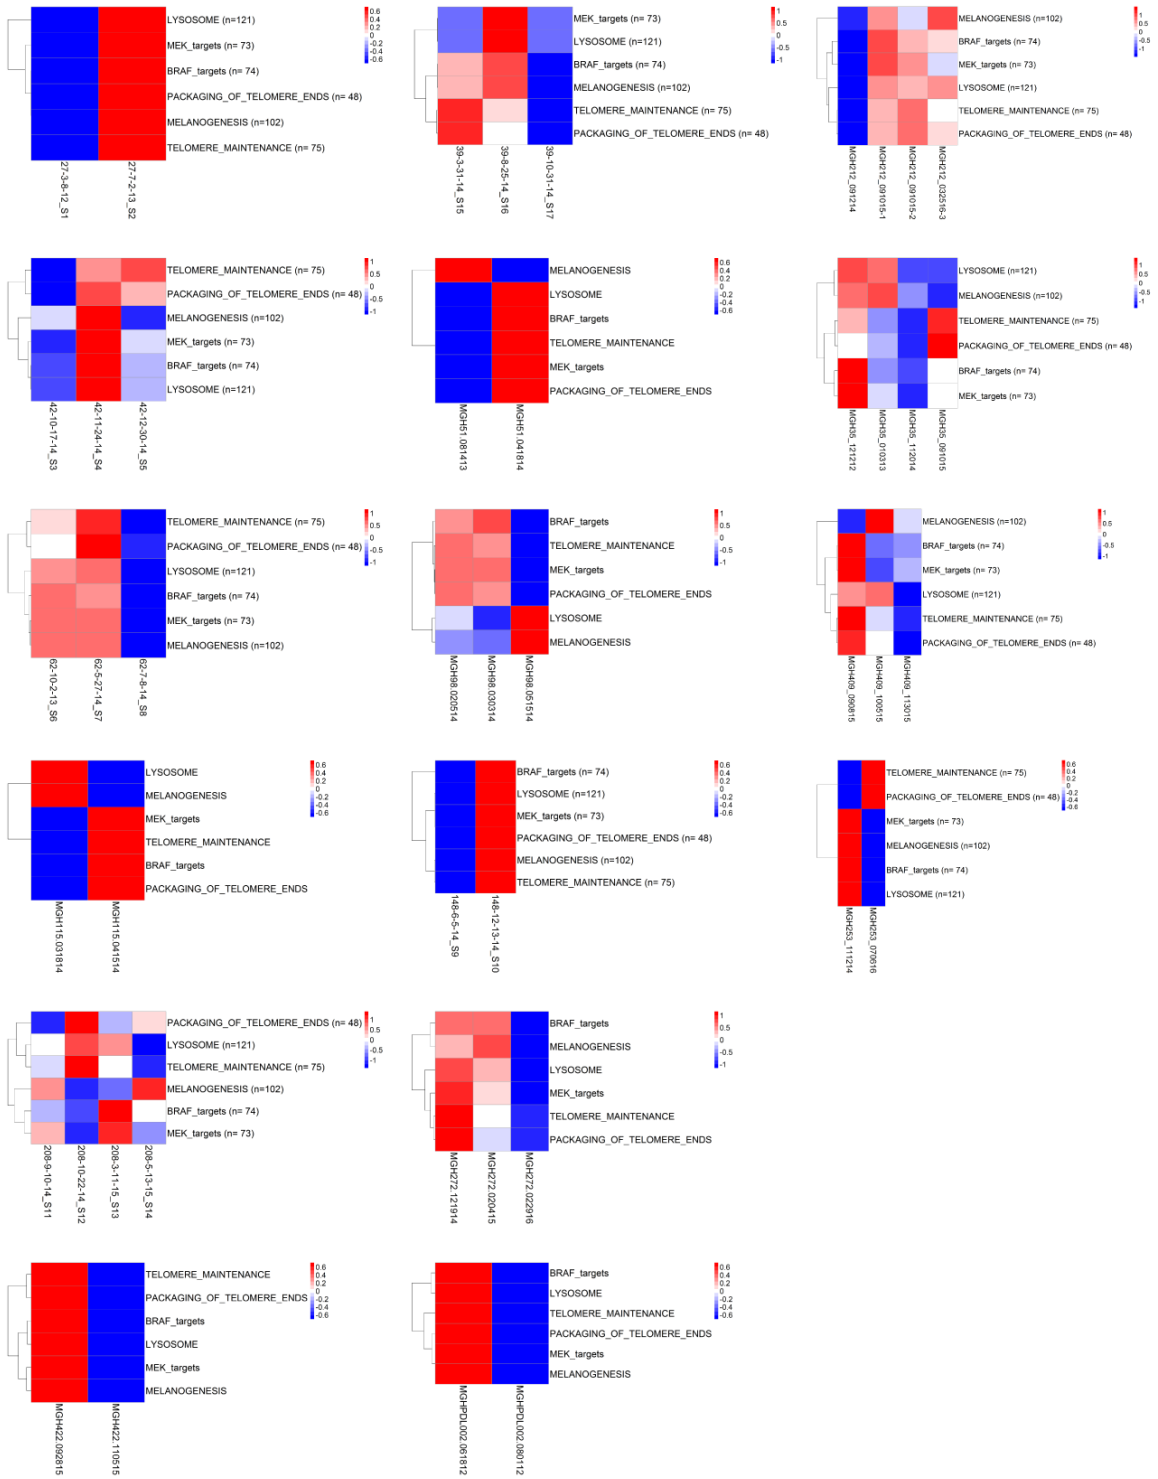

**Supplementary Fig. S4: Related to Fig. 5**

The heatmaps of two telomere transcriptional gene signatures, two melanoma-specific gene sets and two MAPK pathway-related gene sets in paired pre-, on- and post-treatment tumor biopsies derived from 16 patients who were treated with immunotherapies.

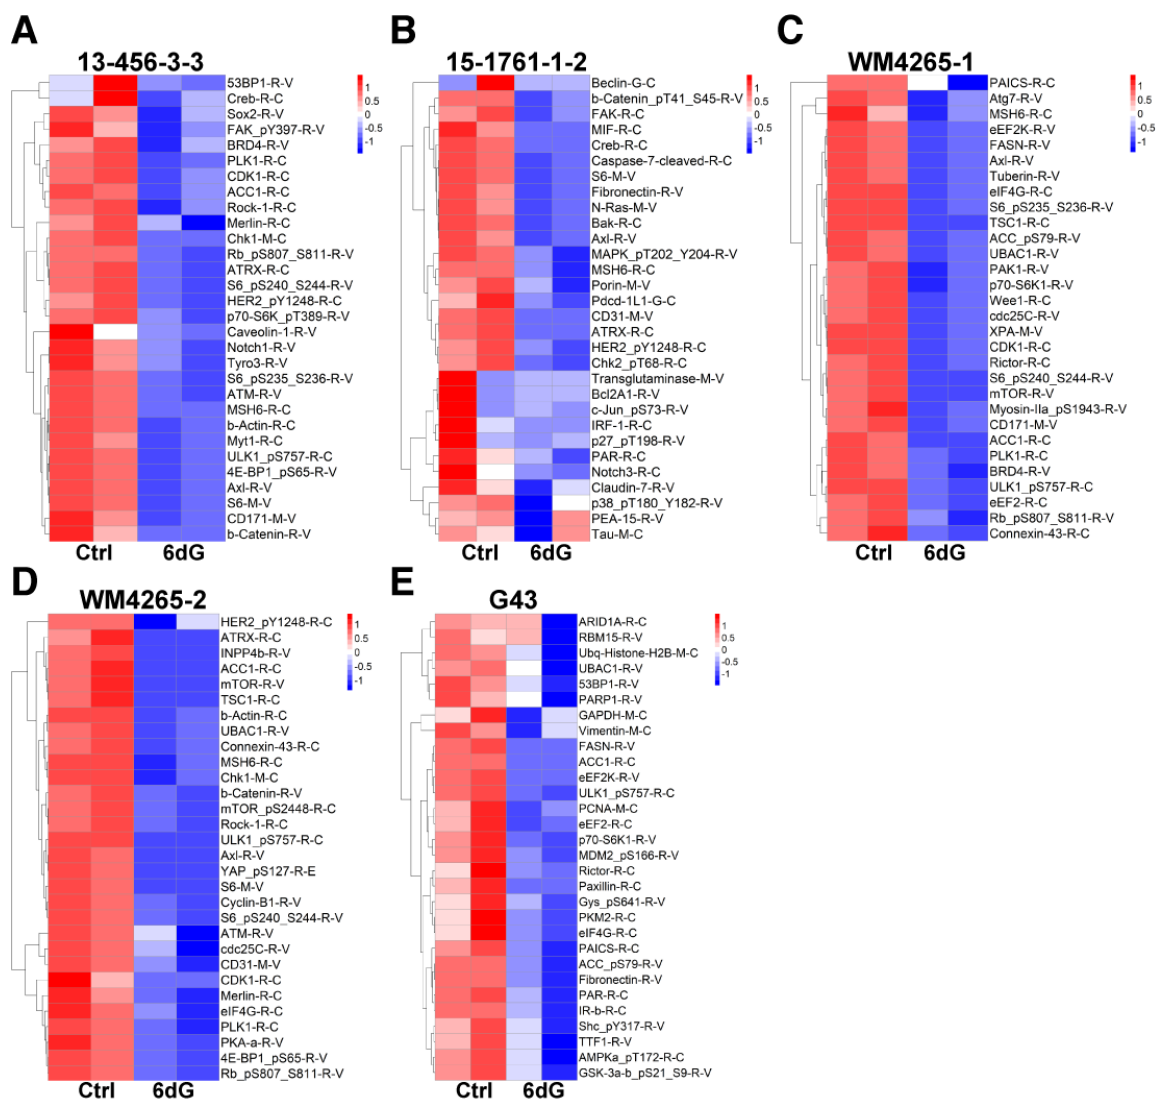

**Supplementary Fig. S5: Related to Fig. 6**

(A-E) The heatmaps of RPPA data depicting 30 proteins that were most significantly down-regulated in 5 short-term cultures or cell lines derived from immunotherapy-resistant tumors that were treated with 6-thio-dG, including 13-456-3-3 (A), 15-1761-1-2 (B), WM4265-1 (C), WM4265-2 (D) and G43 (E).
