# Supplementary material for: Induction of Telomere Dysfunction Prolongs Disease Control of Therapy-Resistant Melanoma
Source: Oxford University Press journal article supplement (doi:10.1158/1078-0432.ccr-17-2773), 2018-03-21
Supplement: 10780432ccr172773-sup-189704_2_supp_4595953_p4tgsg.xlsx [file 10780432ccr172773-sup-189704_2_supp_4595953_p4tgsg.xlsx]

## Sheet: Index
Table S1	Mean density values of crystal violet staining of 16 melanoma cell lines treated with 6-thio-dG and PLX4720.	Fig. 2A-D
Table S2	RNA-seq data related to A375 cells treated with 6-thio-dG.	Fig. 3B
Table S3	RNA-seq data related to A375 cells treated with BIBR 1532.	Fig. 3C
Table S4	Apoptotic index and ssGSEA scores of 11 gene sets in 18 CCLE melanoma cell lines.	Fig. 3G-I
Table S5	RPPA data related to A375 cells treated with 6-thio-dG.	Fig. 3M
Table S6	Mean density values of crystal violet staining of 6 therapy-resistant melanoma cell lines treated with 6-thio-dG.	Fig. 4A
Table S7	RPPA data related to the comparison between LOX-IMVI parental and BR cells.	Fig. 4I
Table S8	RPPA data related to LOX-IMVI parental cells treated with 6-thio-dG.	Fig. 4J
Table S9	RPPA data related to LOX-IMVI BR cells treated with 6-thio-dG.	Fig. 4K
Table S10	RPPA data related to LOX-IMVI BR xenografts treated with 6-thio-dG.	Fig. 4L
Table S11	The clinical information from patients with metastatic melanoma treated with immunotherapies.	Fig. 5C-G

## Sheet: Table S1
1	WM902B	Ctrl	6dG 1uM	6dG 2.5uM	6dG 5uM	PLX4720 1uM	PLX4720 5uM
	Replicate 1	0.58	0.36	0.15	0.08	0.09	0.07
	Replicate 2	0.63	0.38	0.13	0.08	0.09	0.09
2	WM853-2	Ctrl	6dG 1uM	6dG 2.5uM	6dG 5uM	PLX4720 1uM	PLX4720 5uM
	Replicate 1	0.53	0.12	0.08	0.07	0.11	0.08
	Replicate 2	0.58	0.11	0.09	0.08	0.1	0.07
3	WM983A	Ctrl	6dG 1uM	6dG 2.5uM	6dG 5uM	PLX4720 1uM	PLX4720 5uM
	Replicate 1	0.83	0.2	0.09	0.08	0.06	0.06
	Replicate 2	0.64	0.23	0.07	0.08	0.07	0.07
4	WM1341D	Ctrl	6dG 1uM	6dG 2.5uM	6dG 5uM	PLX4720 1uM	PLX4720 5uM
	Replicate 1	1.48	0.29	0.11	0.1	0.07	0.07
	Replicate 2	1.6	0.39	0.11	0.08	0.08	0.07
5	A375	Ctrl	6dG 1uM	6dG 2.5uM	6dG 5uM	PLX4720 1uM	PLX4720 5uM
	Replicate 1	0.48	0.12	0.1	0.09	0.11	0.09
	Replicate 2	0.47	0.1	0.09	0.1	0.09	0.09
6	SK-MEL-28	Ctrl	6dG 1uM	6dG 2.5uM	6dG 5uM	PLX4720 1uM	PLX4720 5uM
	Replicate 1	0.45	0.35	0.25	0.11	0.09	0.08
	Replicate 2	0.39	0.39	0.26	0.11	0.09	0.08
7	1205Lu	Ctrl	6dG 1uM	6dG 2.5uM	6dG 5uM	PLX4720 1uM	PLX4720 5uM
	Replicate 1	1.2	0.1	0.1	0.09	0.11	0.09
	Replicate 2	0.74	0.1	0.08	0.08	0.1	0.08
8	WM9	Ctrl	6dG 1uM	6dG 2.5uM	6dG 5uM	PLX4720 1uM	PLX4720 5uM
	Replicate 1	1.15	0.22	0.12	0.08	0.18	0.11
	Replicate 2	1.63	0.23	0.14	0.09	0.19	0.12
9	WM115	Ctrl	6dG 1uM	6dG 2.5uM	6dG 5uM	PLX4720 1uM	PLX4720 5uM
	Replicate 1	0.35	0.12	0.09	0.09	0.09	0.11
	Replicate 2	0.3	0.13	0.09	0.08	0.1	0.08
10	WM278	Ctrl	6dG 1uM	6dG 2.5uM	6dG 5uM	PLX4720 1uM	PLX4720 5uM
	Replicate 1	0.18	0.14	0.12	0.09	0.07	0.07
	Replicate 2	0.18	0.13	0.11	0.08	0.07	0.07
11	WM858	Ctrl	6dG 1uM	6dG 2.5uM	6dG 5uM	PLX4720 1uM	PLX4720 5uM
	Replicate 1	2.7	0.25	0.09	0.07	0.65	0.17
	Replicate 2	2.23	0.23	0.09	0.09	0.87	0.17
12	WM35	Ctrl	6dG 1uM	6dG 2.5uM	6dG 5uM	PLX4720 1uM	PLX4720 5uM
	Replicate 1	0.59	0.13	0.07	0.07	0.07	0.07
	Replicate 2	0.39	0.12	0.08	0.07	0.07	0.06
13	WM989	Ctrl	6dG 1uM	6dG 2.5uM	6dG 5uM	PLX4720 1uM	PLX4720 5uM
	Replicate 1	0.36	0.12	0.1	0.09	0.08	0.08
	Replicate 2	0.4	0.13	0.11	0.1	0.08	0.08
14	WM1158	Ctrl	6dG 1uM	6dG 2.5uM	6dG 5uM	PLX4720 1uM	PLX4720 5uM
	Replicate 1	0.46	0.18	0.21	0.17	0.2	0.17
	Replicate 2	0.47	0.19	0.17	0.15	0.12	0.18
15	WM793	Ctrl	6dG 1uM	6dG 2.5uM	6dG 5uM	PLX4720 1uM	PLX4720 5uM
	Replicate 1	1.33	0.63	0.09	0.09	0.1	0.08
	Replicate 2	1.31	0.63	0.09	0.08	0.11	0.06
16	WM46	Ctrl	6dG 1uM	6dG 2.5uM	6dG 5uM	PLX4720 1uM	PLX4720 5uM
	Replicate 1	0.58	0.36	0.15	0.08	0.09	0.07
	Replicate 2	0.63	0.38	0.13	0.08	0.09	0.09

## Sheet: Table S2
SYMBOL	logFC	AveExpr	t	P.Value	adj.P.Val	B	A375_CTRL_1	A375_CTRL_2	A375_6.thio.dG_1	A375_6.thio.dG_2
ALPP	3.82264	2.03887	9.69294	1.63068e-05	0.0494835	3.34801	0.1330799	0.1220197	4.3028260	3.5975516
HSPA1A	3.05391	2.3822	8.53023	3.96775e-05	0.0510101	2.63083	0.7288264	0.9816719	3.9833145	3.8350052
LCE1F	2.95341	2.27917	8.40574	4.39019e-05	0.0510101	2.54642	0.8122584	0.7926763	3.8161661	3.6955979
TREM2	2.80425	1.48162	7.61628	8.59546e-05	0.0562751	1.9725	0.1589906	0.0000000	3.0910392	2.6764520
TNFSF9	2.75716	5.55802	6.83836	0.000176335	0.0596546	1.33519	3.903865	4.455007	7.210262	6.662932
HMOX1	2.71484	4.23982	6.97986	0.000154029	0.0596546	1.45685	2.555301	3.209493	5.559529	5.634947
CCL26	2.68425	1.71553	7.41717	0.000102727	0.0562751	1.81654	0.1959279	0.5508888	3.0801463	3.0351722
HSPA1B	2.65708	2.1594	7.45566	9.92189e-05	0.0562751	1.84706	0.7534015	0.9083209	3.5933674	3.3825229
C11orf86	2.64562	1.46795	6.76627	0.000189066	0.0596546	1.2722	0.1874139	0.1028692	3.1263654	2.4551500
SPINK1	2.52246	1.72644	6.74487	0.000193041	0.0596546	1.25336	0.4164914	0.5139355	2.7365157	3.2388222
HSPA8	2.39696	9.63498	6.45906	0.000256097	0.062281	0.99574	8.274487	8.598500	10.657007	11.009911
TUBB3	2.3773	7.10184	5.46556	0.000737434	0.0861037	0.00723591	5.427793	6.398579	8.414489	8.166486
LCE1C	2.34261	1.51991	6.63954	0.000214009	0.0607833	1.15973	0.3732905	0.3239228	2.6074569	2.7749846
CYP1A1	2.31851	2.5585	6.45126	0.000258113	0.062281	0.988549	1.273087	1.525408	3.814128	3.621394
ZNF114	2.24882	1.25652	6.34421	0.000287641	0.0651269	0.888998	0.1281009	0.1361140	2.2715051	2.4903526
PVRL4	2.19721	3.30076	5.96257	0.00042789	0.0767995	0.520464	2.226986	2.177312	4.621918	4.176807
LCE1B	2.08766	1.29098	5.94547	0.000435751	0.0767995	0.503443	0.1946416	0.2996696	2.3543694	2.3152525
PANX2	2.05821	1.92381	5.21512	0.000982183	0.0896663	-0.266309	1.0829778	0.7064241	3.2525639	2.6532572
GPRC5D	2.02186	1.8572	5.23193	0.000963207	0.0890182	-0.247624	1.1021726	0.5903724	2.6794031	3.0568715
PTAFR	1.9537	1.54894	5.57181	0.000654669	0.084321	0.120221	0.5752695	0.5689093	2.5685041	2.4830669
PRAMEF12	1.92227	1.36435	4.73606	0.00174113	0.108434	-0.818444	0.3790409	0.4273949	2.7235215	1.9274536
LCE1E	1.89321	1.34998	5.28953	0.000901201	0.0887108	-0.183961	0.4314235	0.3753235	2.4395460	2.1536123
CILP2	1.88669	2.07777	4.54792	0.0021999	0.113819	-1.04583	1.4956971	0.7731484	3.2581294	2.7840948
GCNT3	1.8803	0.94015	5.20074	0.000998739	0.0900785	-0.282327	0.000000	0.000000	1.704096	2.056505
GPX3	1.84676	3.07602	4.42332	0.00257581	0.116681	-1.19971	1.879958	2.425321	4.346763	3.652031
PSMB6	1.84046	7.48689	4.66704	0.00189596	0.11062	-0.90116	6.234833	6.898481	8.526333	8.287899
TCTEX1D4	1.81087	2.01784	4.80223	0.00160562	0.1045	-0.739893	1.3538065	0.8709947	3.0495843	2.7969547
RPS26	1.79866	4.57559	4.21427	0.00337369	0.122091	-1.46371	4.037558	3.314959	5.781514	5.168320
RNASEK	1.77699	1.89946	4.32625	0.00291729	0.120721	-1.32139	1.2109274	0.8109904	3.1539818	2.4219229
KLLN	1.77271	1.86376	4.53849	0.00222612	0.113819	-1.05738	1.3002003	0.6546079	2.8451504	2.6550858
SLC6A6	1.77212	3.47897	4.80474	0.00160071	0.1045	-0.736924	2.808694	2.377127	4.432037	4.298022
S1PR4	1.7589	4.18154	3.72348	0.0065213	0.150014	-2.11145	3.809968	2.794200	5.408470	4.713506
ZNF219	1.75766	3.34638	4.05191	0.00417905	0.128027	-1.67374	2.634398	2.300704	4.693514	3.756910
GCLM	1.74538	2.21559	3.67079	0.00701418	0.152463	-2.18321	1.348602	1.337200	2.464024	3.712538
HES2	1.74493	1.99372	4.33155	0.00289742	0.120721	-1.3147	0.967731	1.274774	3.221443	2.510927
FTH1	1.7271	9.86345	4.58972	0.00208755	0.113615	-0.994786	9.003414	8.996381	10.995288	10.458717
NEFL	1.71903	3.53552	4.86417	0.00148918	0.102674	-0.667022	2.587486	2.764533	4.431459	4.358619
TRIM54	1.70635	0.951495	4.81375	0.00158322	0.1045	-0.726287	0.13675998	0.05988207	1.90727066	1.70206804
COL17A1	1.67715	1.56581	4.71737	0.00178163	0.108434	-0.840759	0.8297604	0.6247200	2.4699919	2.3387850
PRDX1	1.66588	7.78574	4.23158	0.00329835	0.122004	-1.44158	6.603551	7.302038	8.599864	8.637494
NOL3	1.66354	4.9436	4.26425	0.00316106	0.121691	-1.39994	3.808134	4.415533	5.915311	5.635441
BMF	1.66354	1.5214	4.63835	0.00196473	0.111879	-0.935793	0.6801766	0.6990923	2.5052055	2.2011399
IFI6	1.66329	4.62357	4.17115	0.00356971	0.122501	-1.51907	3.477246	4.106608	5.651296	5.259140
DUSP13	1.65819	0.860638	4.55066	0.00219234	0.113819	-1.04248	0.0630837	0.0000000	1.8841777	1.4952911
TMEM173	1.65554	4.21613	4.21147	0.00338606	0.122091	-1.4673	3.076204	3.700515	5.196131	4.891663
CYP4F3	1.65268	1.10291	4.51484	0.00229348	0.113819	-1.08643	0.3648841	0.1882529	1.7405934	2.1178974
ACP5	1.6498	2.80505	4.25085	0.00321662	0.121709	-1.417	1.737052	2.223239	3.846411	3.413478
KCNK3	1.64565	1.11505	4.65462	0.00192539	0.11062	-0.916132	0.2209352	0.3635052	2.0047085	1.8710314
LCP1	1.63866	1.61622	3.56053	0.00817989	0.158676	-2.33466	0.7589157	0.8348689	1.8570870	3.0140182
SPATA25	1.62228	2.95415	3.57374	0.0080298	0.158676	-2.31642	2.506341	1.779681	4.192427	3.338156
KANK3	1.61983	1.19313	4.15029	0.00366895	0.123078	-1.54597	0.3389362	0.4274893	2.3352820	1.6708061
PTGES3	1.61371	2.4782	4.53097	0.0022473	0.113819	-1.06661	1.561598	1.781100	3.351707	3.218410
CLU	1.60696	3.05597	3.97819	0.00461164	0.133352	-1.77052	2.310380	2.194593	4.246441	3.472455
CARD6	1.59477	2.1935	3.43391	0.00977994	0.167859	-2.51064	1.483993	1.308241	2.405301	3.576470
OSGIN1	1.59393	3.84285	4.25489	0.00319973	0.121709	-1.41184	2.847611	3.244162	4.806873	4.472752
PVRIG	1.5926	1.71417	3.71356	0.00661121	0.150449	-2.12494	1.3607598	0.4749822	2.6975917	2.3233449
DGKG	1.59211	2.125	4.31988	0.00294136	0.120721	-1.32943	1.403840	1.254047	2.709663	3.132446
APOBEC3H	1.58578	1.44566	4.28647	0.00307122	0.120721	-1.37171	0.6191850	0.6863619	2.4688690	2.0082408
WNT9A	1.57381	2.70515	4.29678	0.00303052	0.120721	-1.35865	1.799847	2.036648	3.665207	3.318904
TRIM64B	1.55921	0.943398	4.24809	0.00322818	0.121709	-1.42051	0.24760775	0.07997958	1.92067529	1.52532853
HIST1H2BG	1.55519	2.78989	4.30768	0.00298809	0.120721	-1.34485	1.841720	2.182877	3.544123	3.590859
PIR	1.54572	2.58921	3.9656	0.00469024	0.134422	-1.78713	1.606517	2.026186	3.103594	3.620550
PNRC1	1.53367	3.62442	3.56339	0.00814716	0.158676	-2.33071	3.283089	2.432067	4.625932	4.156572
SPP1	1.53197	1.70826	2.2863	0.0535777	0.281694	-4.16712	0.8765342	1.0080078	1.3679878	3.5805017
DDN	1.52552	1.89583	4.16072	0.00361897	0.122735	-1.53252	1.000009	1.266122	2.823885	2.493292
CD82	1.52535	2.81837	3.46383	0.00937371	0.166653	-2.46886	1.589119	2.522264	3.807066	3.355017
QRFP	1.49747	1.98124	3.88215	0.0052494	0.138871	-1.8979	1.442045	1.022965	2.964758	2.495194
HEXIM1	1.49724	4.57855	4.10428	0.00389858	0.125724	-1.60553	4.014705	3.645158	5.403344	5.251009
COL7A1	1.49657	2.7482	3.08409	0.0161983	0.194224	-3.00692	2.644457	1.355376	3.594598	3.398376
SPR	1.48959	5.81358	3.4331	0.00979114	0.167859	-2.51177	4.576727	5.560839	6.631613	6.485124
YPEL3	1.48141	1.62337	3.79345	0.00592357	0.144229	-2.0168	1.1890447	0.5762933	2.5024055	2.2257537
MAGED1	1.47763	4.86135	3.37867	0.0105798	0.172931	-2.58806	4.448295	3.796772	5.990890	5.209432
SLC52A1	1.47734	1.13625	4.05429	0.00416584	0.128027	-1.67063	0.5112271	0.2839298	2.0358276	1.7139993
MAP1A	1.4761	1.5191	3.87117	0.00532814	0.139776	-1.91254	0.9656604	0.5964389	2.4855677	2.0287280
MYH7B	1.46383	1.26342	4.00853	0.004428	0.130473	-1.73058	0.7242472	0.3387708	1.9334431	2.0572345
FOLR3	1.45959	0.991062	4.07446	0.00405567	0.127219	-1.64431	0.1333789	0.3891563	1.6452706	1.7964410
C17orf97	1.45629	1.47156	3.42708	0.00987518	0.167859	-2.52019	0.9719528	0.5148746	2.6075434	1.7918647
FBXO2	1.45276	2.13265	3.65717	0.00714797	0.152734	-2.20182	1.070591	1.741939	3.001261	2.716792
A2M	1.44744	1.88669	4.06254	0.00412039	0.127822	-1.65986	1.291932	1.034018	2.595391	2.625432
SHISA2	1.44711	2.6429	3.15737	0.014555	0.187344	-2.90187	2.455578	1.383105	3.161649	3.571257
GUCA1B	1.44206	1.62761	4.0213	0.00435311	0.129655	-1.71383	0.9570500	0.8561097	2.4919557	2.2053253
TREH	1.43697	1.18692	4.04854	0.00419786	0.128027	-1.67815	0.5268126	0.4100634	2.0045400	1.8062727
KRTAP19.1	1.43439	0.81816	3.81079	0.00578483	0.144133	-1.99347	0.2019331	0.0000000	1.7845292	1.2861766
CD68	1.42656	7.94784	3.17204	0.0142478	0.187188	-2.8809	6.691235	7.777888	8.731277	8.590961
SFN	1.42525	3.1381	3.33444	0.0112706	0.175394	-2.65033	1.989743	2.861214	4.042291	3.659158
UBAP1L	1.42411	1.11858	3.49364	0.00898702	0.16339	-2.42736	0.72463001	0.08841901	2.08198433	1.57928139
RASD1	1.42335	1.27039	3.50087	0.00889576	0.162965	-2.4173	0.5797106	0.5377309	2.3829191	1.5812152
VWCE	1.4188	1.70141	3.84251	0.00553989	0.143003	-1.95089	1.0860377	0.8979854	2.6190115	2.2026029
GDNF	1.41571	1.60742	3.91074	0.00505011	0.137918	-1.85982	1.0231341	0.7760045	2.4457733	2.1847768
ZSCAN4	1.41135	0.861104	3.15666	0.0145701	0.187344	-2.90289	0.1018522	0.2090055	1.0297540	2.1038048
CCDC17	1.40918	1.52615	3.91778	0.00500228	0.137237	-1.85047	0.9468964	0.6962235	2.1292488	2.3322289
GBA	1.40902	5.63092	3.70669	0.00667422	0.150449	-2.13428	4.699186	5.153641	6.512224	6.158639
IFI30	1.40883	7.15894	3.39481	0.0103392	0.171617	-2.5654	6.047640	6.861398	8.010361	7.716344
FAM212B	1.3893	3.36029	3.81759	0.00573129	0.144133	-1.98432	2.517500	2.813788	4.179774	3.930114
KCNK7	1.38408	1.27921	3.48495	0.00909797	0.164487	-2.43945	0.8178757	0.3564597	2.2531153	1.6893768
ABHD15	1.37725	2.81511	3.68623	0.00686574	0.152099	-2.16214	2.049356	2.203616	3.745567	3.261895
SERPINA1	1.37484	1.95546	3.47639	0.00920862	0.165302	-2.45135	0.9533295	1.5827640	2.8120476	2.4737178
TCAP	1.37248	1.64741	3.63035	0.00741956	0.15495	-2.23855	1.1338496	0.7884991	2.5508306	2.1164800
GM2A	1.37144	2.99591	3.85065	0.0054788	0.142431	-1.93998	2.280320	2.340058	3.806578	3.556679
SLC25A45	1.35509	2.9317	3.18799	0.0139215	0.185951	-2.85813	2.489443	2.018870	4.013720	3.204767
SLC16A13	1.35426	1.94802	3.21468	0.0133931	0.185096	-2.82009	1.403123	1.138651	3.060372	2.189921
INPP5D	1.3532	1.17333	3.53136	0.00852184	0.160173	-2.375	0.4043073	0.5891648	2.1382814	1.5615833
LAMB3	1.34519	3.86451	3.33253	0.0113016	0.175511	-2.65303	2.966029	3.417803	4.855258	4.218960
GAST	1.34179	1.35968	3.34198	0.0111496	0.17485	-2.6397	0.4309504	0.9466220	2.3120426	1.7491103
FAM89B	1.34158	6.1571	3.2681	0.0123981	0.182138	-2.74416	5.130598	5.842025	7.043965	6.611810
NXF1	1.34032	5.06816	2.74996	0.0265754	0.226894	-3.49113	4.970300	3.825700	6.062924	5.413721
C9orf172	1.33457	2.17735	2.74758	0.0266702	0.227153	-3.4946	1.944905	1.075238	3.332169	2.357104
ROM1	1.32942	2.73674	3.2497	0.0127316	0.184369	-2.77027	1.740572	2.403480	3.644333	3.158561
TBX10	1.32764	1.56453	3.22213	0.0132494	0.185096	-2.80948	1.2643333	0.5370896	2.4422099	2.0144845
TP53I3	1.32695	6.04097	3.03793	0.0173327	0.198859	-3.07334	4.906477	5.848516	6.891882	6.517006
CDKN1A	1.32605	7.28942	3.16899	0.0143111	0.187188	-2.88526	6.238335	7.014455	8.170127	7.734764
TSPAN10	1.31997	2.25199	3.44183	0.00967051	0.167859	-2.49956	1.366848	1.817159	3.116675	2.707280
NOXO1	1.31687	3.02015	3.1981	0.0137187	0.185951	-2.84371	2.512852	2.210589	4.071367	3.285809
DISP2	1.31402	1.28033	3.42979	0.0098373	0.167859	-2.5164	0.760770	0.485864	2.206738	1.667929
SNCG	1.30572	2.72871	3.27467	0.0122813	0.181675	-2.73485	2.206709	1.944993	3.728371	3.034779
TP53I11	1.30331	1.85558	3.43164	0.00981151	0.167859	-2.51382	1.355158	1.052678	2.750249	2.264215
PRR13	1.30268	6.3007	3.60855	0.00764843	0.156658	-2.26848	5.596328	5.702404	7.115586	6.788501
PBXIP1	1.29763	2.00198	3.50157	0.00888701	0.162965	-2.41634	1.157248	1.549087	2.783300	2.518293
CDHR5	1.29548	1.14341	3.35038	0.0110163	0.174107	-2.62787	0.7894225	0.2019082	1.9154537	1.6668408
HSPB1	1.29159	8.43802	3.29526	0.0119227	0.179334	-2.70569	7.546003	8.038458	9.321715	8.845917
FERMT3	1.28965	1.50198	3.46906	0.00930459	0.166091	-2.46157	0.6720592	1.0422459	2.3047627	1.9888359
C1orf189	1.28584	0.918251	3.60381	0.00769927	0.156703	-2.27501	0.2316578	0.3190039	1.4334143	1.6889264
SLC34A3	1.28325	1.71623	2.45433	0.0415066	0.261342	-3.9228	1.8099004	0.3393118	2.5220578	2.1936635
PIM2	1.28308	4.16854	3.32547	0.0114166	0.175753	-2.66299	3.573629	3.480381	5.121765	4.498395
AVPR2	1.2804	1.60685	3.37445	0.0106437	0.173103	-2.59399	1.1604027	0.7729046	2.4553208	2.0387796
P2RX6	1.28034	1.47712	3.59471	0.00779774	0.156703	-2.28753	0.7545327	0.9193654	2.2160817	2.0185055
FAM83H	1.27855	2.01264	3.00753	0.0181255	0.201242	-3.11719	1.605417	1.141319	3.058473	2.245355
C17orf98	1.27803	0.639015	3.42704	0.00987575	0.167859	-2.52024	0.000000	0.000000	1.527999	1.028060
TMOD4	1.27715	1.46922	3.24061	0.0129	0.184643	-2.7832	1.1808491	0.4804409	2.0768881	2.1387058
PTPRCAP	1.27249	2.98985	3.44106	0.0096811	0.167859	-2.50064	2.455059	2.252142	3.834536	3.417646
GATS	1.2621	1.16761	3.33683	0.0112321	0.175394	-2.64696	0.7444487	0.3286748	1.9837824	1.6135491
PELI3	1.26198	2.83851	3.47854	0.00918077	0.165095	-2.44837	2.049283	2.365759	3.566447	3.372548
DPP3	1.26094	4.77879	3.2176	0.0133364	0.185096	-2.81592	3.834063	4.462567	5.544464	5.274052
LOC100287036	1.25978	0.927343	3.55331	0.00826305	0.158676	-2.34462	0.2269849	0.3679181	1.4723280	1.6421424
TSPAN1	1.25941	1.90801	3.16702	0.0143522	0.187188	-2.88808	0.9295888	1.6270257	2.6498765	2.4255534
PRG2	1.25764	1.51663	3.58445	0.00791036	0.157972	-2.30165	0.8453887	0.9302276	2.1702490	2.1206392
SQSTM1	1.2553	9.86319	2.83698	0.0233356	0.21818	-3.36438	8.721859	9.749218	10.600029	10.381646
MUC13	1.25226	0.833968	3.05518	0.0168993	0.19704	-3.0485	0.1741320	0.2415471	1.0476007	1.8725907
PIDD1	1.24813	4.0348	3.06486	0.0166609	0.196889	-3.03456	3.609211	3.212257	5.010672	4.307046
UNKL	1.24558	2.95722	3.3135	0.0116143	0.17735	-2.6799	2.521684	2.147176	3.769313	3.390717
SIGLEC14	1.24392	0.692051	3.54923	0.00831051	0.158676	-2.35027	0.08168439	0.05849800	1.34962641	1.27839369
LOC730183	1.23675	2.17074	2.44758	0.0419333	0.261694	-3.93263	2.1777364	0.9269956	3.1186969	2.4595322
AIFM2	1.23477	4.42822	3.29516	0.0119245	0.179334	-2.70583	3.595774	4.025894	5.191512	4.899697
LPAR2	1.23343	2.60799	2.85177	0.0228273	0.216506	-3.34287	2.350639	1.631904	3.562133	2.887273
HSPB3	1.23324	0.616622	3.2379	0.0129505	0.184643	-2.78704	0.0000000	0.0000000	1.5248445	0.9416437
FTL	1.22861	11.0312	2.74111	0.0269301	0.227191	-3.50404	9.89252	10.94134	11.78700	11.50408
NHLH1	1.22559	1.35341	3.46281	0.00938724	0.166653	-2.47028	0.7580296	0.7232091	2.0674553	1.8649652
NTN3	1.22438	1.13963	3.00072	0.0183081	0.201242	-3.12702	0.7677578	0.2871178	2.0801998	1.4234284
PTGES	1.22423	1.88686	3.23344	0.0130343	0.184643	-2.79338	1.057192	1.492298	2.675706	2.322236
FCRLA	1.2228	2.6751	3.38333	0.0105098	0.172655	-2.58152	1.905164	2.222224	3.361171	3.211823
MAPK7	1.22052	2.74455	2.81592	0.0240801	0.220518	-3.39503	2.427275	1.841300	3.755006	2.954605
PARD6G	1.21969	2.04447	3.06722	0.0166034	0.196671	-3.03116	1.784966	1.084280	2.761139	2.547487
LYZ	1.20823	1.30575	3.05542	0.0168934	0.19704	-3.04815	0.7459358	0.6573255	1.5554818	2.2642386
PYCARD	1.20491	0.717002	3.43622	0.00974781	0.167859	-2.5074	0.07457139	0.15451997	1.30314731	1.33576844
KIAA1324	1.20377	0.954807	3.42081	0.00996364	0.167859	-2.52897	0.3400602	0.3657800	1.6273742	1.4860142
ADAT3	1.20117	2.61073	3.03935	0.0172968	0.198804	-3.0713	1.957018	2.063269	3.563505	2.859126
KCND1	1.19631	1.35481	3.0834	0.0162145	0.194224	-3.0079	1.0384070	0.4748965	2.1148014	1.7911188
LY96	1.1957	1.22038	3.22691	0.0131581	0.185096	-2.80268	0.7346184	0.5104445	1.6102568	2.0262074
MMP3	1.19415	1.21006	3.0747	0.0164224	0.195433	-3.02041	0.4716878	0.7542922	1.5125770	2.1016966
ASIP	1.19135	1.64566	2.98046	0.0188633	0.203797	-3.15629	1.4238906	0.6760904	2.2179065	2.2647693
EPHX1	1.18892	3.80461	3.29215	0.0119761	0.179656	-2.71009	3.133163	3.287137	4.554028	4.244110
NDUFB10	1.18781	7.89939	3.20858	0.0135118	0.185096	-2.82877	7.143725	7.467247	8.662710	8.323893
EEF1D	1.1852	4.3038	3.10945	0.0156084	0.192475	-2.9705	3.849896	3.572505	5.154483	4.638320
PLAC8L1	1.18441	1.56703	2.53849	0.0365386	0.251546	-3.79994	1.2700542	0.6796032	1.6386234	2.6798444
ABHD3	1.17854	1.50594	3.04319	0.0171994	0.198757	-3.06576	1.0112234	0.8221268	1.7877038	2.4027193
TSPAN11	1.17825	2.98554	3.05458	0.0169141	0.19704	-3.04936	2.240264	2.552565	3.847890	3.301448
AKR1B10	1.17823	0.734647	3.32746	0.0113841	0.175724	-2.66019	0.07212563	0.21893609	1.24890056	1.39862566
PILRA	1.17776	0.830608	3.25138	0.0127009	0.184257	-2.7679	0.39083448	0.09262652	1.52287035	1.31610103
CST6	1.17569	2.67982	2.53191	0.0369041	0.251546	-3.80955	2.595688	1.588250	3.578557	2.956765
RRH	1.16798	0.695633	2.95736	0.0195179	0.205654	-3.1897	0.14450273	0.07878441	0.92609057	1.63315519
GNRH2	1.16657	1.04732	3.20236	0.0136342	0.185579	-2.83763	0.6584957	0.2695735	1.6039051	1.6573116
SLC25A34	1.16617	1.28409	2.80968	0.0243053	0.220518	-3.40411	1.0402266	0.3617856	2.1360077	1.5983416
RUNDC3A	1.16509	1.44098	3.09126	0.016029	0.193885	-2.99661	0.5898559	1.1270094	2.0629776	1.9840716
NEURL2	1.16443	1.7726	2.77504	0.0255963	0.2227	-3.45457	1.321042	1.059733	2.784428	1.925203
FOXO1	1.16307	2.29832	2.40364	0.0448253	0.267695	-3.99667	2.363031	1.070545	2.830828	2.928881
OMP	1.1583	0.905164	3.17111	0.0142671	0.187188	-2.88223	0.4157574	0.2362743	1.6664242	1.3022008
TMEM40	1.15825	1.01107	3.23133	0.0130743	0.184643	-2.79639	0.2814685	0.5824270	1.5926245	1.5877684
THAP8	1.15484	2.15021	3.168	0.0143316	0.187188	-2.88667	1.553658	1.591930	2.924716	2.530554
KCNC3	1.1546	1.42912	2.68359	0.0293582	0.234663	-3.58799	1.2616085	0.4420386	2.2666423	1.7462023
DPH3P1	1.15282	3.12851	3.09898	0.0158491	0.193474	-2.98553	2.769628	2.334567	3.817032	3.592799
RNF208	1.15019	1.86774	2.15156	0.065766	0.301441	-4.36133	1.8619110	0.7233757	2.9815487	1.9041228
C9orf131	1.14919	0.686066	3.24616	0.012797	0.184621	-2.77531	0.18776000	0.03517939	1.19019351	1.33113111
RHOF	1.14851	1.67163	3.12568	0.0152428	0.190785	-2.94723	0.996672	1.198081	2.438439	2.053333
MROH6	1.1482	2.18924	2.37031	0.0471532	0.272323	-4.04518	2.195911	1.034369	3.054330	2.472350
SPSB2	1.14023	4.93505	2.8782	0.0219474	0.213478	-3.30447	4.070046	4.659818	5.711894	5.298429
ATP2A1	1.13805	1.36402	2.95433	0.0196054	0.205771	-3.19408	1.0425780	0.5474195	2.1233853	1.7427084
LUM	1.1374	0.889134	2.20333	0.0607858	0.293822	-4.28695	0.1839469	0.4569163	0.7346029	2.1810685
IZUMO1R	1.13602	0.568009	3.08615	0.0161493	0.193989	-3.00395	0.000000	0.000000	0.914566	1.357469
KEAP1	1.13459	5.91276	2.78668	0.0251549	0.222033	-3.43761	4.969324	5.721603	6.626371	6.333730
RGAG4	1.12945	1.54705	2.79528	0.0248334	0.220993	-3.42507	1.1590243	0.8056303	2.4613908	1.7621562
IGFLR1	1.12926	1.5165	3.11327	0.0155216	0.192475	-2.96503	0.9956662	0.9080804	2.2609899	1.9012835
CEBPD	1.12839	2.67235	2.77513	0.0255928	0.2227	-3.45444	1.779510	2.436805	3.467266	3.005829
CLIP3	1.1206	2.56681	2.12397	0.068583	0.307087	-4.40083	2.613588	1.399428	3.593808	2.660408
NPC1L1	1.11969	0.684915	3.16903	0.0143103	0.187188	-2.8852	0.17985022	0.07029371	1.32180423	1.16771052
GLMP	1.1196	5.9842	2.75882	0.0262251	0.225488	-3.47821	5.065039	5.783763	6.716357	6.371641
SAMD1	1.11547	5.09213	2.58424	0.034098	0.24594	-3.73311	4.705811	4.362980	6.108988	5.190747
FSCN2	1.1116	1.02977	2.69224	0.0289789	0.234663	-3.57536	0.6247648	0.3231753	1.9828847	1.1882477
HIGD1B	1.11117	0.935303	2.76213	0.0260956	0.225052	-3.47339	0.7594329	0.0000000	1.4283083	1.5534726
NOV	1.11034	2.48408	2.46791	0.0406607	0.259792	-3.90299	2.231540	1.626277	2.581911	3.496588
GRIN2C	1.1098	1.22711	2.79715	0.0247644	0.220993	-3.42236	0.7604620	0.5839612	2.1337334	1.4302990
NATD1	1.10917	3.36811	2.89146	0.0215194	0.212375	-3.28522	2.859783	2.767275	4.223897	3.621493
FNBP1	1.10894	2.86495	2.37854	0.0465674	0.271537	-4.03321	2.854604	1.766364	3.666204	3.172648
TIAF1	1.10124	0.765867	3.12668	0.0152208	0.190785	-2.94581	0.2593791	0.1711107	1.3800328	1.2529459
HTATIP2	1.10089	2.41372	3.12028	0.0153636	0.191572	-2.95498	1.777360	1.949176	2.979122	2.949204
FAM132A	1.09618	2.51227	2.84904	0.0229204	0.216516	-3.34685	2.019733	1.908634	3.365494	2.755226
TEX19	1.09389	0.619757	3.07079	0.016517	0.196375	-3.02604	0.1456198	0.0000000	1.2734129	1.0599935
GJB5	1.09268	2.3555	2.98967	0.0186086	0.202107	-3.14297	1.724870	1.893451	3.088174	2.715514
NUMBL	1.0923	3.20467	2.77982	0.0254139	0.222638	-3.4476	2.849708	2.467332	4.039931	3.461713
ABCC2	1.08957	2.3286	2.50126	0.038657	0.256186	-3.85432	2.206192	1.361446	2.600061	3.146715
AOC3	1.08601	1.61882	2.88788	0.0216341	0.212533	-3.29042	1.2363468	0.9152728	2.3752264	1.9484187
CNFN	1.08554	2.13794	2.90125	0.0212089	0.21194	-3.27101	1.697763	1.492581	2.916161	2.445261
TOB1	1.08468	3.29619	2.31765	0.0510834	0.277289	-4.12168	3.355938	2.151766	3.811776	3.865285
SEMA6C	1.08327	1.93101	2.56243	0.0352399	0.248568	-3.76497	1.7799204	0.9988352	2.7156903	2.2296024
SYNM	1.07763	2.0416	2.68709	0.0292039	0.234663	-3.58287	1.857537	1.148038	2.444467	2.716378
TEP1	1.07568	2.82779	2.6692	0.0299999	0.236977	-3.60899	2.644857	1.935034	3.521465	3.209791
TAS1R3	1.07186	1.08286	2.97197	0.019101	0.204464	-3.16855	0.6243265	0.4695300	1.7692438	1.4683238
KIAA1683	1.07083	0.652288	2.88946	0.0215834	0.212375	-3.28812	0.2337418	0.0000000	1.3934351	0.9819749
ZSWIM1	1.06603	3.5948	1.90791	0.0951551	0.34124	-4.70572	3.803143	2.320419	4.532778	3.722846
HSPA2	1.06438	1.37806	2.89987	0.0212523	0.212207	-3.273	0.659545	1.032194	2.016999	1.803494
LYG2	1.06261	0.999582	2.96372	0.0193354	0.205261	-3.1805	0.5567967	0.3797595	1.6536478	1.4081230
CCDC103	1.06082	2.40749	2.63579	0.0315472	0.241007	-3.65779	1.522151	2.232015	3.088443	2.787362
EFNA4	1.05901	2.71715	2.96505	0.0192973	0.205261	-3.17857	2.146566	2.228729	3.379023	3.114296
SLC16A5	1.05814	4.29198	2.68457	0.0293147	0.234663	-3.58655	3.916057	3.609761	5.137723	4.504374
CTSF	1.05202	5.06365	2.34694	0.048858	0.273785	-4.07915	4.029711	5.045570	5.782372	5.396943
CLN8	1.05172	3.0483	2.74287	0.0268591	0.227186	-3.50147	2.784287	2.260602	3.728527	3.419799
CCDC142	1.05127	3.27806	2.85723	0.0226427	0.216453	-3.33494	2.754217	2.750638	4.024096	3.583302
PRKD2	1.04944	4.01831	2.78791	0.0251087	0.222033	-3.43582	3.388293	3.598882	4.790531	4.295515
PYM1	1.04442	5.38889	2.61904	0.0323541	0.243137	-3.68228	4.543455	5.189916	6.092891	5.729312
RHBDL1	1.04432	3.84608	1.73387	0.123557	0.376138	-4.94364	4.195542	2.452296	4.747858	3.988613
GPNMB	1.04422	4.77685	2.90943	0.020953	0.210535	-3.25914	4.275494	4.233982	5.145759	5.452149
GIPR	1.0442	1.36106	2.88556	0.0217088	0.212776	-3.29378	0.8757976	0.8021357	2.0580197	1.7083056
VSIG10L	1.04059	1.47578	2.68821	0.0291547	0.234663	-3.58123	0.9633245	0.9476391	2.3168932	1.6752530
ZBTB32	1.03952	1.92769	2.65478	0.0306582	0.238492	-3.63006	1.703884	1.111971	2.616241	2.278652
TRIM48	1.03688	0.580963	2.68914	0.0291142	0.234663	-3.57989	0.04035990	0.08469046	1.41260222	0.78620122
C1orf122	1.03635	5.13086	2.09022	0.0721923	0.310067	-4.44899	4.021333	5.204041	5.987100	5.310964
KRBA2	1.03477	0.709562	2.8271	0.0236817	0.219944	-3.37875	0.2539053	0.1304514	1.4256253	1.0282656
NARF	1.029	3.05648	2.68844	0.0291446	0.234663	-3.5809	2.288907	2.795051	3.733346	3.408613
SRRT	1.0266	5.30998	2.87872	0.0219305	0.213476	-3.30372	4.765984	4.827383	5.952855	5.693703
TPRN	1.02658	3.1406	2.61236	0.0326814	0.243338	-3.69203	2.647266	2.607358	4.000063	3.307727
GPR68	1.0255	1.05306	2.66632	0.0301305	0.236983	-3.61321	0.8494663	0.2311567	1.5804335	1.5511978
TESK2	1.02427	1.98687	2.78193	0.0253341	0.222638	-3.44453	1.302674	1.646800	2.639285	2.358738
AHDC1	1.02371	3.23339	2.28729	0.0534969	0.281694	-4.16568	3.094414	2.348658	4.137395	3.353097
PROZ	1.02364	1.8556	2.45266	0.0416116	0.261342	-3.92523	1.7634842	0.9240774	2.5031107	2.2317366
ZNF576	1.02322	3.43653	2.55779	0.0354882	0.24948	-3.77176	2.554809	3.295041	4.013918	3.882363
ANGPTL4	1.02313	1.83241	2.78799	0.0251054	0.222033	-3.4357	1.209971	1.431709	2.527398	2.160549
SRCAP	1.02192	5.04217	1.64724	0.14052	0.397167	-5.05869	5.421914	3.640512	5.993165	5.113092
GRN	1.02019	6.14761	2.56279	0.035221	0.248568	-3.76445	5.354344	5.920675	6.892754	6.422654
HIST1H2BD	1.01808	3.45782	2.5286	0.0370897	0.251871	-3.81439	2.739056	3.158505	3.642613	4.291106
VWA5A	1.01491	2.27332	2.83282	0.0234809	0.218524	-3.37044	1.656135	1.875586	2.680075	2.881471
ZNF490	1.01289	2.11725	2.3196	0.0509321	0.277283	-4.11885	2.117304	1.104311	2.617625	2.629769
ASB16	1.01213	1.54062	2.56597	0.0350521	0.248291	-3.7598	1.3425665	0.7265562	2.2190780	1.8742954
CPT1A	1.01154	2.77131	2.45476	0.0414794	0.261342	-3.92217	2.492819	2.038268	3.632627	2.921537
PIP5KL1	1.00714	0.815054	2.68206	0.0294255	0.234761	-3.59022	0.4173334	0.2056323	1.5606103	1.0766389
ORAI3	1.00388	4.91783	2.61773	0.032418	0.243154	-3.68419	4.296207	4.535575	5.699465	5.140080
ARMC7	0.999705	3.22259	2.69573	0.0288274	0.234379	-3.57026	2.846158	2.599323	3.926019	3.518872
KIAA0930	0.99638	3.17302	2.62134	0.0322421	0.242859	-3.67891	2.499720	2.849944	3.899583	3.442842
B4GALNT1	0.993846	3.18525	2.66147	0.0303509	0.237257	-3.62028	2.632540	2.744123	3.928673	3.435683
SOGA1	0.992585	2.6773	1.95534	0.0885753	0.332865	-4.63957	2.754659	1.607364	3.597316	2.749877
FRMD8	0.991637	5.17091	2.56714	0.03499	0.248291	-3.75809	4.753088	4.597105	5.974205	5.359262
CAMK2G	0.991109	3.28574	2.67549	0.0297178	0.235468	-3.59982	2.621716	2.958657	3.946087	3.616504
NR4A2	0.986046	3.40337	2.14129	0.0668006	0.303728	-4.37604	3.465971	2.354720	4.064465	3.728319
KIAA1161	0.98527	1.03932	2.70721	0.0283346	0.233053	-3.5535	0.5582720	0.5351058	1.7254948	1.3384234
HUS1B	0.983382	1.36165	2.51	0.0381486	0.254477	-3.84155	0.6050964	1.1348117	2.0691639	1.6375083
NTN1	0.982832	0.900354	2.58125	0.0342525	0.246281	-3.73748	0.4788470	0.3390291	1.6742669	1.1092742
GOLGA7B	0.982326	2.0726	2.72851	0.0274434	0.229524	-3.52242	1.441494	1.721388	2.649391	2.478143
MBOAT7	0.981836	4.83062	2.53252	0.0368703	0.251546	-3.80866	4.269767	4.409634	5.637506	5.005566
AHNAK2	0.981113	4.37698	2.59756	0.0334192	0.244911	-3.71365	4.093531	3.679308	5.049427	4.685639
TCP11L2	0.979575	1.6216	2.35122	0.0485415	0.273785	-4.07294	1.4502208	0.8134112	1.8099390	2.4128424
RASSF7	0.978767	2.46289	2.6371	0.0314852	0.240677	-3.65588	1.988079	1.958934	3.191672	2.712874
FUT11	0.97624	2.82045	2.39275	0.0455729	0.269536	-4.01253	2.643747	2.020910	3.570335	3.046803
ARL14	0.975313	0.768202	2.00475	0.0821904	0.324434	-4.57015	0.2137260	0.3473652	0.6038257	1.9078908
TMEM102	0.97455	3.25615	2.29555	0.0528292	0.280439	-4.15372	2.369197	3.168545	3.983324	3.503516
WFIKKN1	0.974222	0.853605	2.60937	0.032829	0.243338	-3.69639	0.5503389	0.1826488	1.5136102	1.1678214
ZSWIM3	0.972396	3.00314	2.56018	0.0353603	0.248952	-3.76827	2.257654	2.776228	3.610850	3.367825
FAM222A	0.970203	1.49888	2.4362	0.0426641	0.26284	-3.94924	1.2638935	0.7636687	2.2548496	1.7131177
PRDM15	0.969837	1.9375	2.71355	0.0280664	0.232627	-3.54425	1.592253	1.312906	2.403837	2.440995
HYPM	0.969457	0.600909	2.43682	0.0426236	0.26284	-3.94832	0.0000000	0.2323617	0.7374941	1.4337817
PRUNE	0.969096	3.73547	2.65711	0.0305508	0.238186	-3.62666	3.391713	3.110141	4.361069	4.078976
KMT2D	0.967963	4.20894	1.42385	0.194618	0.453618	-5.34216	4.737372	2.712548	5.195578	4.190268
INCA1	0.967739	2.81723	2.08573	0.0726867	0.310601	-4.45539	2.825345	1.841382	3.628299	2.973905
ALOX12	0.967629	1.98378	2.58708	0.0339519	0.245847	-3.72896	1.755996	1.243934	2.471779	2.463409
GCHFR	0.965991	3.16785	2.27281	0.0546882	0.282854	-4.18664	2.328993	3.040710	3.954478	3.347206
HRCT1	0.96587	1.54293	2.44021	0.0424053	0.262358	-3.94339	0.7592259	1.3607654	2.2213263	1.8304051
SETD1B	0.965744	3.24267	1.52309	0.168606	0.428165	-5.21881	3.677529	1.842076	4.183068	3.268024
PTGER1	0.962943	0.770617	2.45039	0.0417554	0.261342	-3.92854	0.3336233	0.2446675	1.5959870	0.9081902
TNNC2	0.962088	1.11737	2.744	0.0268136	0.227186	-3.49982	0.6773545	0.5953007	1.6078020	1.5890290
COMMD9	0.961714	2.1219	2.47696	0.0401068	0.258897	-3.88979	1.333468	1.948621	2.711375	2.494141
BCORL1	0.959035	1.9313	1.9206	0.0933493	0.338645	-4.68807	1.920147	0.983412	2.918605	1.903025
LOC105372280	0.958263	1.36892	1.84614	0.104436	0.353853	-4.7911	1.5082633	0.2713122	2.2606731	1.4354293
GAS2L1	0.957764	2.99466	2.41975	0.0437424	0.265228	-3.9732	2.567168	2.464380	3.828522	3.118553
SDCBP2	0.956573	1.67172	2.40743	0.0445681	0.26741	-3.99115	0.8285046	1.5583571	2.1429292	2.1570781
MAF	0.954019	2.35481	2.55115	0.0358459	0.250283	-3.78145	2.133255	1.622338	2.842885	2.820747
IP6K2	0.953641	4.48657	2.64546	0.0310913	0.239673	-3.64367	3.970949	4.048550	5.126659	4.800123
CTSA	0.951698	5.64081	2.44881	0.0418555	0.261342	-3.93085	4.877809	5.452118	6.274876	5.958446
CYP4F2	0.951675	0.676347	2.66759	0.0300727	0.236983	-3.61135	0.2055897	0.1954288	1.0177237	1.2866457
NNAT	0.950223	1.93577	2.32032	0.0508759	0.277283	-4.1178	1.867787	1.053521	2.477414	2.344339
SRD5A3	0.949118	2.31416	2.51625	0.0377894	0.253695	-3.83242	1.572719	2.106492	2.731243	2.846204
AQP3	0.947982	2.87847	2.3618	0.0477672	0.273689	-4.05756	2.115560	2.693404	3.601225	3.103703
ASTN2	0.947601	1.30418	2.69169	0.0290029	0.234663	-3.57616	0.7561166	0.9046490	1.7844003	1.7715681
CNTF	0.946635	1.80579	1.95827	0.0881832	0.331979	-4.63547	1.6851600	0.9797918	1.7369611	2.8212610
MAP6D1	0.943887	1.33128	2.68282	0.0293919	0.234731	-3.58911	0.8230046	0.8956730	1.7428025	1.8636499
RIBC1	0.943055	1.28889	2.64632	0.031051	0.239652	-3.64242	0.6871255	0.9476014	1.7702963	1.7505401
LPCAT1	0.942887	4.41527	2.57997	0.0343186	0.246281	-3.73935	3.976412	3.911241	5.088465	4.684962
MIEF2	0.941872	3.72522	2.47971	0.0399398	0.258335	-3.88577	2.998257	3.510318	4.324565	4.067754
GPR62	0.938676	1.04744	2.63058	0.0317959	0.241751	-3.6654	0.7123877	0.4438146	1.5335243	1.5000301
RABEP2	0.937456	3.13898	2.58635	0.0339898	0.245847	-3.73004	2.629545	2.710954	3.786289	3.429122
TPGS1	0.934466	3.70696	2.1134	0.0696938	0.307454	-4.41593	2.847383	3.632072	4.521765	3.826622
RNF224	0.934026	1.3881	2.02522	0.0796788	0.321899	-4.54125	1.4733844	0.3687804	2.0405282	1.6696893
LAPTM5	0.93333	1.59845	2.48522	0.0396078	0.257793	-3.87773	0.9515218	1.3120507	2.2584707	1.8717611
GPRIN1	0.932205	2.34555	2.53288	0.0368503	0.251546	-3.80814	1.751153	2.007734	2.991694	2.631603
BCL2L11	0.928882	1.65821	2.43371	0.0428257	0.26284	-3.95287	1.4814984	0.9060398	2.1899378	2.0553646
LAMTOR1	0.928298	7.25653	2.56819	0.0349345	0.248291	-3.75655	6.703094	6.881676	7.871822	7.569545
IRGQ	0.924976	2.44302	2.23101	0.0582795	0.288207	-4.24706	2.345552	1.615502	3.135031	2.675976
TCHH	0.924543	0.751214	2.44437	0.0421386	0.262095	-3.93732	0.3915144	0.1863703	0.9547123	1.4722580
OAS1	0.920966	1.9828	2.62619	0.0320072	0.242205	-3.67183	1.535233	1.509392	2.485590	2.400966
FAM214B	0.919478	4.89005	2.39931	0.0451213	0.26808	-4.00298	4.186986	4.673644	5.530274	5.169314
TRIM16L	0.915476	3.24906	2.37193	0.0470374	0.272063	-4.04282	2.603062	2.979574	3.960282	3.453305
TP53INP1	0.914975	2.66843	1.62865	0.144431	0.401542	-5.08304	2.866811	1.555069	2.581547	3.670282
DUSP14	0.914919	6.51312	2.32032	0.0508765	0.277283	-4.11781	5.732591	6.378721	7.111348	6.829801
B3GNT4	0.914437	0.784378	2.53314	0.0368355	0.251546	-3.80775	0.4954306	0.1588889	1.2765446	1.2066482
TMPPE	0.91424	1.77048	2.30027	0.0524517	0.279444	-4.14689	1.599704	1.027017	2.000549	2.454651
ZNF503	0.913334	2.71058	2.4133	0.0441726	0.266432	-3.9826	2.210013	2.297814	3.443281	2.891214
APOL1	0.912525	0.927405	2.57512	0.0345706	0.247067	-3.74643	0.5160815	0.4262040	1.4820858	1.2852500
PRICKLE4	0.912389	2.36492	2.40981	0.0444076	0.266968	-3.98769	1.771535	2.045913	3.065545	2.576681
PTGDR2	0.912089	0.744772	2.5194	0.0376095	0.253393	-3.82782	0.3750289	0.2024258	1.3586413	1.0429913
TAC4	0.910621	1.46059	2.48992	0.0393266	0.257585	-3.87086	1.1835075	0.8270615	2.0194058	1.8124049
ESAM	0.909138	2.30695	2.00387	0.0822996	0.324434	-4.57139	2.412186	1.292581	2.747136	2.775906
ZFP64	0.908832	3.25241	2.45808	0.0412709	0.261277	-3.91732	2.980229	2.615759	3.849502	3.564151
CTRL	0.908563	2.01922	2.53299	0.0368441	0.251546	-3.80798	1.621670	1.508210	2.615282	2.331725
ALPK3	0.908466	0.692446	2.54967	0.0359262	0.250283	-3.78361	0.3332508	0.1431749	1.2354083	1.0579489
OTUB2	0.908061	2.22075	2.42796	0.0432009	0.263646	-3.96124	1.530570	2.002860	2.773498	2.576055
DNAJB1	0.907296	7.07983	2.10983	0.0700737	0.307454	-4.42104	6.144279	7.108092	7.585650	7.481313
LPXN	0.907055	5.35789	2.42438	0.043436	0.26436	-3.96646	4.650208	5.158508	5.775313	5.847513
FOXK1	0.906991	3.42005	1.56878	0.157722	0.416793	-5.16059	3.723150	2.209953	4.347006	3.400079
TREML1	0.903716	0.519135	2.57044	0.0348163	0.247904	-3.75328	0.04346136	0.09109267	1.03226732	0.90971790
ABCD1	0.903502	3.85859	2.39108	0.0456887	0.269555	-4.01496	3.407824	3.405850	4.586798	4.033880
IL3RA	0.903099	1.40088	2.32255	0.0507039	0.277283	-4.11457	1.1654865	0.7331707	2.1001314	1.6047242
MUC5B	0.901247	1.38493	1.91612	0.0939829	0.339151	-4.6943	1.4549544	0.4136608	2.1524297	1.5186789
HIST1H2BC	0.900325	1.31786	1.83376	0.106397	0.355892	-4.80809	0.3576221	1.3777807	1.3368969	2.1991558
POM121C	0.898501	3.20606	1.51865	0.1697	0.429351	-5.22442	3.541191	1.972420	4.145929	3.164684
SNX29	0.897913	2.1517	2.27812	0.0542484	0.282176	-4.17896	2.012089	1.393398	2.768028	2.433284
NSG1	0.896554	0.54081	2.51225	0.0380189	0.254275	-3.83827	0.14074491	0.04432085	1.11596757	0.86220541
SLC35G6	0.896003	0.654618	2.43597	0.0426789	0.26284	-3.94957	0.3111928	0.1020395	1.2958339	0.9094047
ITLN2	0.895076	0.574503	2.53545	0.0367073	0.251546	-3.80439	0.05039535	0.20353440	1.06985431	0.97422821
HIST1H3D	0.893659	1.52077	2.55058	0.035877	0.250283	-3.78229	1.049901	1.097985	1.991291	1.943914
WBP1L	0.893134	4.56069	2.20781	0.0603728	0.292837	-4.2805	3.738422	4.489830	5.124556	4.889965
CST7	0.892632	1.55623	2.50711	0.0383159	0.255326	-3.84577	1.130934	1.088903	2.128046	1.877056
AOC2	0.892401	3.08124	2.21291	0.0599066	0.291793	-4.27315	3.003188	2.266883	3.652093	3.402780
CGB7	0.892315	0.785478	2.51881	0.037643	0.253456	-3.82868	0.3022891	0.3763523	1.3319532	1.1313184
MXD4	0.891871	3.95674	2.23318	0.058087	0.287763	-4.24392	3.240790	3.780812	4.660356	4.144989
TCTA	0.891547	6.02786	2.08531	0.0727328	0.310695	-4.45599	5.121555	6.042612	6.595344	6.351917
RAPGEFL1	0.891255	2.01365	2.41018	0.0443827	0.266944	-3.98715	1.678806	1.457240	2.662868	2.255688
ISYNA1	0.891117	4.47567	2.27509	0.0544996	0.282557	-4.18336	3.940834	4.119380	5.250565	4.591883
LRP10	0.890123	6.1267	2.27849	0.0542181	0.282176	-4.17843	5.574043	5.789240	6.890906	6.252623
TRIM49B	0.889202	0.651801	2.14705	0.0662188	0.302589	-4.3678	0.2399437	0.1744560	0.6680864	1.5247170
EPOR	0.889163	3.30929	2.32512	0.0505059	0.277283	-4.11083	2.758197	2.971217	4.033337	3.474403
SNAP47	0.88892	5.17253	2.4047	0.0447535	0.267537	-3.99513	4.547670	4.908477	5.761281	5.472705
IGFL1	0.888525	0.444263	2.48666	0.0395215	0.257585	-3.87563	0.0000000	0.0000000	1.0285836	0.7484665
SPACA6	0.888473	0.87864	2.48813	0.0394333	0.257585	-3.87347	0.4716232	0.3971846	1.4555628	1.1901906
MSN	0.888117	6.94114	2.46518	0.0408289	0.260267	-3.90696	6.346738	6.647417	7.455678	7.314710
GNS	0.886697	4.65309	2.00417	0.0822629	0.324434	-4.57097	4.733042	3.686441	5.138607	5.054270
ESPNL	0.884816	0.815902	2.34675	0.0488725	0.273785	-4.07943	0.4412831	0.3057050	1.5219283	0.9946919
HCFC1	0.883928	5.17333	1.65697	0.138512	0.394919	-5.0459	5.340878	4.121847	6.103405	5.127176
DAG1	0.8832	3.4078	2.24308	0.0572192	0.286057	-4.22964	2.737227	3.195169	4.114149	3.584647
SPEF1	0.883109	1.00511	2.50872	0.0382225	0.254836	-3.84342	0.6007491	0.5263591	1.5106013	1.3827239
TLR9	0.881299	0.813826	2.34334	0.0491259	0.274409	-4.08437	0.3993860	0.3469665	1.5203732	0.9885766
AKR1C3	0.880856	0.909089	2.36409	0.0476011	0.273311	-4.05422	0.3669298	0.5703922	1.1232012	1.5758318
LPIN3	0.879675	1.6389	2.39911	0.045135	0.26808	-4.00327	1.260005	1.138120	2.282119	1.875356
MGST2	0.877089	3.14232	2.14257	0.0666709	0.303354	-4.37421	2.293221	3.114335	3.614604	3.547131
PSPN	0.874338	2.06055	2.12459	0.068519	0.307087	-4.39995	1.258510	1.988243	2.705728	2.289701
APOL2	0.874331	4.24611	2.41847	0.0438277	0.265228	-3.97507	3.659278	3.958610	4.775944	4.590606
OSR2	0.873362	0.997265	2.43299	0.0428719	0.26284	-3.9539	0.6237609	0.4974070	1.5756038	1.2922879
MFSD7	0.872358	1.24717	2.47198	0.0404107	0.259542	-3.89705	0.7912991	0.8306831	1.7695302	1.5971678
CHRNB2	0.871322	0.742722	2.48957	0.0393474	0.257585	-3.87137	0.3155873	0.2985346	1.1714284	1.1853370
SNN	0.871198	2.04378	2.32699	0.0503624	0.277283	-4.10812	1.671893	1.544468	2.729449	2.229306
C11orf94	0.870617	2.74934	1.99844	0.08298	0.325103	-4.57904	2.443159	2.184897	3.671022	2.698269
POLR2A	0.869759	5.30526	1.28143	0.238127	0.497148	-5.51081	5.818872	3.921888	6.350453	5.129823
PLCD3	0.869293	4.19428	2.32833	0.0502601	0.277283	-4.10618	3.784113	3.735158	4.880108	4.377750
HSPB8	0.869085	4.84597	2.2496	0.0566539	0.28474	-4.22021	4.187910	4.634953	5.505902	5.055132
RAB3A	0.868943	2.19868	2.40413	0.0447923	0.267644	-3.99596	1.767830	1.760578	2.808487	2.457807
LTK	0.868344	1.3843	2.33408	0.0498225	0.275782	-4.09783	1.1138294	0.7864226	2.0006011	1.6363389
ZBTB3	0.867	1.65984	2.20621	0.0605204	0.293179	-4.28281	1.388683	1.063987	2.399776	1.786894
BRPF3	0.866633	3.42951	2.33617	0.0496645	0.275624	-4.09479	3.134482	2.857913	4.057437	3.668224
FAM189B	0.865803	4.31783	1.90439	0.0956617	0.341714	-4.71061	4.283168	3.486690	5.148500	4.352964
FLYWCH1	0.863466	4.44965	2.26487	0.0553535	0.283665	-4.19814	3.968599	4.067235	5.170603	4.592163
LAPTM4B	0.863019	6.49708	2.42021	0.043712	0.265228	-3.97254	5.940174	6.190968	6.884580	6.972599
DOC2A	0.861786	1.41054	2.30874	0.0517796	0.278446	-4.13459	1.209587	0.749706	1.944298	1.738567
NAT6	0.860848	4.032	2.34863	0.0487329	0.273785	-4.0767	3.635972	3.567170	4.671038	4.253801
PRODH	0.860354	0.785187	2.38079	0.0464086	0.271537	-4.02994	0.2263780	0.4836416	1.3338361	1.0968914
HVCN1	0.858344	0.686483	2.35371	0.0483579	0.273785	-4.06931	0.3200712	0.1945513	1.3045033	0.9268072
ANKRD23	0.858238	1.33314	2.30281	0.0522493	0.279063	-4.1432	1.1214790	0.6865727	1.6416605	1.8828666
TLCD1	0.857813	5.96559	1.9167	0.0939008	0.339151	-4.6935	5.036320	6.037043	6.600405	6.188584
LENEP	0.857243	0.905557	2.40874	0.0444799	0.267277	-3.98925	0.4640452	0.4898258	1.4591568	1.2091996
MYLK	0.857137	1.6474	2.19888	0.061199	0.294497	-4.29336	1.5304137	0.9072463	1.9583692	2.1935655
CACNB3	0.856421	3.42908	2.34949	0.0486693	0.273785	-4.07545	2.881886	3.119862	4.015400	3.699190
APLP1	0.856371	1.98035	2.18248	0.0627449	0.296906	-4.31695	1.648861	1.455473	2.738913	2.078162
MED25	0.855647	3.33249	2.17628	0.0633396	0.297376	-4.32586	2.930834	2.878500	4.106919	3.413710
TSPYL2	0.855502	3.71451	2.44278	0.0422402	0.262188	-3.93964	3.305458	3.268064	4.122982	4.161543
SRXN1	0.852998	6.45267	2.21682	0.0595516	0.291413	-4.26752	5.728226	6.324113	6.965854	6.792480
CTSD	0.850902	7.71712	2.01851	0.0804933	0.322437	-4.55073	6.882510	7.700836	8.343488	7.941664
DHRS2	0.850755	1.05783	2.37991	0.0464708	0.271537	-4.03122	0.5229561	0.7419556	1.5729275	1.3934949
INTS5	0.849766	5.17501	2.15411	0.0655117	0.300864	-4.35768	4.544872	4.955381	5.887276	5.312510
TMEM86B	0.849617	1.65121	2.21969	0.0592914	0.290903	-4.26338	1.4891036	0.9636964	2.2224194	1.9296139
HSPA6	0.846903	1.08056	2.23279	0.0581216	0.287815	-4.24448	0.6073992	0.7068222	1.7834002	1.2246278
JADE2	0.844578	3.76576	2.24119	0.0573832	0.28649	-4.23235	3.120441	3.566496	4.342293	4.033802
GINS4	0.844461	1.70725	2.27303	0.0546702	0.282854	-4.18633	1.472687	1.097353	2.282165	1.976797
ECM1	0.844046	3.07727	2.18714	0.0623011	0.296225	-4.31024	2.631915	2.678578	3.813946	3.184638
FAM180B	0.842899	0.501338	2.38997	0.0457659	0.269555	-4.01658	0.1597756	0.0000000	0.8935051	0.9520694
PCSK1	0.841582	2.50996	2.16315	0.064617	0.298941	-4.34471	2.283202	1.895145	2.664182	3.197329
ING4	0.841122	4.23646	2.32455	0.0505498	0.277283	-4.11166	3.647930	3.983872	4.717377	4.596668
MAGIX	0.840502	1.63594	2.17259	0.063696	0.297611	-4.33116	0.9420716	1.4893036	2.2218992	1.8904794
MAVS	0.83982	5.05607	1.80245	0.111515	0.363923	-4.85087	5.083040	4.189282	5.871235	5.080728
PCDHB8	0.838903	2.21778	2.3239	0.0506001	0.277283	-4.11261	1.963172	1.633487	2.685866	2.588598
RAB39A	0.837732	0.575518	2.28269	0.0538726	0.282075	-4.17235	0.1223780	0.1909262	0.7827210	1.2060473
NR1H3	0.837656	2.00835	2.12427	0.0685517	0.307087	-4.4004	1.271794	1.907242	2.579797	2.274551
CITED1	0.837379	0.976108	2.36505	0.0475315	0.273067	-4.05282	0.4914118	0.6234251	1.3138368	1.4757582
C10orf10	0.83704	1.09443	2.10206	0.0709056	0.309087	-4.43212	0.7979763	0.5538468	1.8606453	1.1652588
PINK1	0.835928	3.2639	1.93691	0.0910772	0.335721	-4.66533	2.373325	3.318554	3.810681	3.553053
MYO18A	0.834952	3.79821	2.2854	0.0536513	0.281694	-4.16843	3.260626	3.500832	4.380011	4.051352
GSDMB	0.834904	2.32871	1.63402	0.143291	0.400357	-5.07602	2.590067	1.232450	2.992249	2.500077
FAXDC2	0.832847	1.77254	2.37652	0.0467107	0.27158	-4.03615	1.324273	1.387970	2.206820	2.171118
UBL5	0.831651	2.12586	2.31309	0.0514388	0.278129	-4.1283	1.852492	1.567572	2.614613	2.468752
CLDN19	0.831364	0.439973	2.37409	0.0468831	0.272063	-4.03968	0.04858131	0.00000000	0.86192445	0.84938458
ZDHHC12	0.830479	5.24594	2.09192	0.0720068	0.309723	-4.44658	4.537001	5.124390	5.875480	5.446869
CFL1	0.828462	10.1805	2.22849	0.0585027	0.289143	-4.25068	9.833290	9.699256	10.828672	10.360798
LDLRAD1	0.828363	0.414182	2.25139	0.0565002	0.284527	-4.21763	0.0000000	0.0000000	1.0487693	0.6079576
POLH	0.827719	3.22359	2.00868	0.0817019	0.324094	-4.5646	3.173907	2.445546	3.850597	3.424293
TMEM63B	0.827715	4.49175	2.11636	0.0693809	0.307147	-4.4117	4.193282	3.962506	5.224050	4.587168
PI3	0.826696	0.60017	2.04561	0.0772522	0.318227	-4.51239	0.3736448	0.0000000	1.3581765	0.6688606
PYGM	0.826013	0.6424	2.21565	0.0596571	0.291467	-4.2692	0.2944674	0.1643199	1.2960781	0.8147354
ZNF460	0.825109	1.63759	1.62411	0.145401	0.40268	-5.08896	1.5157600	0.9343155	1.3977286	2.7025648
PROSER3	0.824923	2.03513	1.5057	0.172927	0.431844	-5.24075	2.3236284	0.9217039	2.8683098	2.0268682
ARHGAP27	0.823845	2.08266	2.19987	0.0611065	0.294415	-4.29193	1.778262	1.563209	2.729827	2.259334
LSMEM1	0.8233	1.08877	1.54898	0.162359	0.422078	-5.18593	0.9329903	0.4212542	0.7679687	2.2328761
SMCR8	0.822041	3.8553	2.0939	0.0717896	0.309723	-4.44375	3.737333	3.151225	4.448576	4.084065
MYH13	0.821729	2.87268	2.31884	0.0509909	0.277283	-4.11995	2.568833	2.354788	3.300189	3.266891
RNF122	0.820978	0.691689	2.32065	0.0508503	0.277283	-4.11732	0.2059411	0.3564597	1.1690072	1.0353495
RNF151	0.82034	0.60426	2.00879	0.0816884	0.324094	-4.56445	0.3881787	0.0000000	1.3735775	0.6552822
GALR2	0.819297	0.784515	2.28525	0.0536636	0.281694	-4.16865	0.2774330	0.4722995	1.3097062	1.0786203
FAM134C	0.818535	3.64218	2.18167	0.0628224	0.29702	-4.31812	3.062340	3.403483	4.250838	3.852055
NOTCH1	0.816901	3.52252	1.63013	0.144117	0.401123	-5.08111	3.613408	2.614722	4.415321	3.446610
CELA2B	0.816838	0.751436	2.24527	0.057029	0.285614	-4.22647	0.4369403	0.2490923	1.3283525	0.9913570
ATF7	0.816637	2.67127	1.78865	0.113845	0.366235	-4.86965	2.811760	1.714144	3.228716	2.930463
NDRG1	0.816196	5.66416	1.89318	0.097294	0.343588	-4.72617	4.784912	5.727207	6.200755	5.943756
GNGT2	0.814838	1.3154	2.11656	0.0693601	0.307147	-4.41142	0.6009547	1.2150088	1.6719438	1.7736949
B3GNT8	0.813714	1.03961	2.01983	0.0803332	0.322266	-4.54887	0.8571562	0.4083509	1.7618773	1.1310573
DIABLO	0.813331	1.98584	2.11053	0.0699993	0.307454	-4.42004	1.318904	1.839452	2.566386	2.218632
DDRGK1	0.812817	5.39674	1.95515	0.0886009	0.332865	-4.63984	4.572932	5.407722	5.926608	5.679680
ZSCAN5A	0.812448	3.00268	2.30301	0.0522333	0.279063	-4.14291	2.510893	2.682020	3.395881	3.421930
SNPH	0.812304	2.28499	2.21566	0.0596559	0.291467	-4.26918	1.713942	2.043732	2.824384	2.557899
BCL9	0.811658	3.20893	1.85894	0.102444	0.351097	-4.77348	3.239217	2.366994	3.872145	3.357381
MAP1S	0.811165	4.15734	1.60251	0.150101	0.408702	-5.11706	4.285136	3.218387	5.030486	4.095368
GBGT1	0.809857	3.07751	2.04638	0.0771616	0.318227	-4.5113	2.390683	2.954486	3.703821	3.261063
ANKLE1	0.809686	2.72611	2.19498	0.0615627	0.295247	-4.29897	2.345423	2.297109	3.355932	2.905971
RDH16	0.807295	0.700677	2.26853	0.0550461	0.283564	-4.19285	0.3894263	0.2046332	1.1891303	1.0195200
PCDHB16	0.807103	2.38549	2.02151	0.0801289	0.322106	-4.5465	2.354399	1.609486	2.773539	2.804552
ZNF341	0.806819	1.51776	2.2936	0.0529862	0.280913	-4.15655	1.176278	1.052428	1.952582	1.889762
DRD4	0.803025	1.20965	1.97544	0.0859218	0.329285	-4.61139	1.0806717	0.5356115	1.9055382	1.3167960
SSSCA1	0.802429	5.50371	1.997	0.0831617	0.325103	-4.58108	4.777865	5.427132	6.108127	5.701729
C7orf61	0.798885	0.74926	2.25415	0.0562634	0.284455	-4.21364	0.2683098	0.4313252	1.2206884	1.0767168
AQP1	0.797777	1.56566	2.24051	0.0574429	0.286499	-4.23334	1.222917	1.110629	2.079073	1.850026
BAG3	0.797561	5.78682	2.16862	0.0640814	0.298265	-4.33686	5.445371	5.330699	6.397361	5.973831
TRPV1	0.797012	2.45055	1.88506	0.0984917	0.345072	-4.73741	2.439091	1.664997	3.097977	2.600134
PCP2	0.796899	0.905579	2.12235	0.068752	0.307109	-4.40314	0.6214580	0.3928019	1.5419394	1.0661175
CCDC65	0.795948	1.33064	2.06389	0.0751383	0.314691	-4.48646	1.2077080	0.6576151	1.8807740	1.5764453
GPR179	0.794986	0.605587	2.24905	0.0567011	0.284753	-4.221	0.2947407	0.1214485	1.0459586	0.9602016
G6PD	0.79307	6.31449	1.98415	0.0847953	0.327587	-4.59915	5.584741	6.251159	6.882103	6.539937
ACER2	0.792864	2.13614	1.68814	0.132256	0.386811	-5.00468	2.246385	1.233030	2.197390	2.867754
AMN	0.792806	0.698541	2.01055	0.0814715	0.323683	-4.56198	0.4513441	0.1529314	1.4142757	0.7756113
NOTCH3	0.791208	2.20789	1.55669	0.160539	0.419898	-5.17608	2.464897	1.159679	2.895280	2.311710
TREX1	0.789828	4.23374	2.04531	0.077287	0.318227	-4.51281	3.586436	4.091212	4.819930	4.437375
SNX21	0.78906	3.70589	2.11149	0.0698972	0.307454	-4.41867	3.243061	3.379655	4.345354	3.855482
C16orf71	0.788752	1.22869	2.16142	0.0647876	0.299043	-4.3472	0.9216191	0.7470068	1.8037778	1.4423518
ULK1	0.785491	3.33972	1.64176	0.141661	0.39854	-5.06587	3.471369	2.422589	4.086562	3.378377
TOB2	0.785285	4.57903	2.09285	0.0719043	0.309723	-4.44525	4.311544	4.061240	5.202512	4.740842
UBAP1	0.784645	5.31108	2.02488	0.0797195	0.321899	-4.54173	4.606099	5.231421	5.783513	5.623297
ANKRD61	0.784078	1.54755	1.77398	0.116374	0.368995	-4.88956	1.6753399	0.6356907	2.0024406	1.8767459
PHKG1	0.783764	0.830753	2.01126	0.0813828	0.323676	-4.56096	0.7172728	0.1604686	1.4044475	1.0408216
NTF4	0.783255	0.719093	2.23751	0.0577059	0.286786	-4.23767	0.3181669	0.3367636	1.0961075	1.1253332
USP35	0.783032	2.06314	2.1559	0.0653335	0.300393	-4.35511	1.813318	1.529925	2.579125	2.330182
PDE2A	0.781047	1.86284	2.16037	0.0648911	0.299305	-4.34871	1.412662	1.531969	2.419075	2.087650
SCAMP2	0.780562	5.89768	2.14437	0.066489	0.303354	-4.37164	5.375052	5.639742	6.430249	6.145669
TRIM74	0.778855	0.822964	2.14835	0.066088	0.302316	-4.36594	0.5595463	0.3075260	1.3460732	1.0787097
ABHD4	0.775651	4.59205	1.94364	0.0901562	0.334757	-4.65594	3.880415	4.528034	5.163044	4.796706
BSN	0.773867	1.00818	1.93434	0.0914325	0.335869	-4.66892	0.8677400	0.3747543	1.6790875	1.1111408
WDR81	0.773586	3.93057	1.9972	0.083136	0.325103	-4.58079	3.647596	3.439963	4.622181	4.012550
CA11	0.772741	3.30085	1.91049	0.0947849	0.340485	-4.70213	2.549580	3.279387	3.834092	3.540357
GLI4	0.772736	4.43434	1.93734	0.0910187	0.335721	-4.66473	4.139556	3.956391	5.180425	4.460994
MVP	0.772688	6.26935	1.84094	0.105255	0.354297	-4.79824	5.458959	6.307048	6.804671	6.506712
CYP2W1	0.77176	1.0536	1.85398	0.103211	0.351958	-4.78031	1.0849047	0.2505258	1.5702584	1.3086921
MYPOP	0.771208	3.10416	1.60678	0.149161	0.40727	-5.11152	3.158360	2.278756	3.950686	3.028845
ALDOC	0.771178	5.32099	1.63401	0.143293	0.400357	-5.07603	4.323397	5.547400	5.757861	5.655293
GGN	0.770432	1.08176	2.07361	0.0740373	0.312701	-4.47264	0.6702481	0.7228484	1.7076438	1.2263160
LRRC73	0.769815	1.84762	2.16874	0.0640694	0.298265	-4.33668	1.483263	1.442156	2.346000	2.119050
TOX4	0.768217	4.9193	2.08804	0.0724326	0.310067	-4.45211	4.316586	4.753807	5.330435	5.276391
PCDHA5	0.76535	1.19361	2.13257	0.0676929	0.305947	-4.38854	0.9646400	0.6572263	1.5614703	1.5910962
FAM134A	0.764885	4.76712	1.96916	0.0867426	0.330449	-4.62021	4.121922	4.647431	5.344119	4.955004
ICOSLG	0.764076	0.84697	1.82162	0.108355	0.35958	-4.82471	0.6282024	0.3016608	1.6467154	0.8112999
FGF18	0.763603	0.594856	2.17868	0.0631085	0.297086	-4.32241	0.2466587	0.1794506	0.9590739	0.9942409
CMBL	0.76163	3.87555	2.13232	0.0677178	0.305947	-4.38888	3.379227	3.610249	4.333270	4.179467
DQX1	0.761566	0.748648	2.0239	0.0798387	0.321899	-4.54312	0.4739837	0.2617464	1.3757961	0.8830652
MMP24	0.761431	1.04426	2.09179	0.0720207	0.309723	-4.44676	0.8374598	0.4896345	1.5117379	1.3382185
CEL	0.760639	0.673174	2.12821	0.0681427	0.306558	-4.39477	0.3886046	0.1971053	1.1568965	0.9500908
ZFYVE1	0.760588	3.17934	2.04512	0.0773096	0.318227	-4.51309	2.593431	3.004663	3.691345	3.427926
HDHD3	0.757984	2.29444	2.03058	0.0790332	0.320866	-4.53367	1.825114	2.005777	2.908658	2.438202
TSSK6	0.757964	3.72822	1.70969	0.128088	0.381875	-4.976	3.711022	2.987443	4.491587	3.722807
C8G	0.757893	0.624935	2.09401	0.0717782	0.309723	-4.4436	0.3554706	0.1365058	1.1457250	0.8620376
LOC100129924	0.756718	1.06253	1.801	0.111758	0.363954	-4.85285	1.0282361	0.3400969	1.1493144	1.7324538
CEP85	0.753953	3.97709	2.11326	0.0697087	0.307454	-4.41613	3.658848	3.541380	4.475326	4.232809
MEGF6	0.753663	0.658282	2.08951	0.072271	0.310067	-4.45002	0.3877537	0.1751482	1.1671139	0.9031140
SHPK	0.753594	2.65968	2.00295	0.0824146	0.324434	-4.57269	2.497355	2.068412	3.197202	2.875753
DNASE1L2	0.75235	2.31476	1.74884	0.120827	0.373396	-4.9235	2.369895	1.507284	2.913342	2.468536
TMEM266	0.751443	1.02007	2.09622	0.0715375	0.309519	-4.44045	0.7658092	0.5228779	1.3064526	1.4851209
ACRBP	0.750981	1.19967	1.69402	0.131107	0.385064	-4.99687	1.2435692	0.4047825	1.8956029	1.2547114
SIGLEC5	0.750009	0.409357	2.00196	0.0825388	0.324594	-4.57409	0.06870399	0.00000000	1.04150044	0.52722183
UBL7	0.748446	5.79495	1.79879	0.112129	0.364171	-4.85587	5.010616	5.830837	6.318741	6.019605
PRAMEF2	0.74808	0.566028	1.99227	0.0837588	0.32608	-4.58772	0.1699848	0.2139912	1.2031683	0.6769671
VPS33A	0.746558	4.17873	2.10145	0.0709713	0.309088	-4.43299	3.718517	3.892389	4.471130	4.632893
CDK3	0.74605	3.4018	2.00407	0.0822756	0.324434	-4.57111	3.171322	2.886226	3.975633	3.574016
PCDH12	0.745936	0.960908	2.03079	0.079008	0.320866	-4.53337	0.8041091	0.3717707	1.3452222	1.3225291
KCTD2	0.744947	4.27232	2.04077	0.0778209	0.318723	-4.51924	3.726553	4.073149	4.747479	4.542117
GRIP2	0.744348	0.535591	2.06382	0.0751456	0.314691	-4.48655	0.1867669	0.1400670	1.0754297	0.7401004
RASL11A	0.744131	1.82115	2.10377	0.0707221	0.308756	-4.42969	1.434576	1.463600	2.292062	2.094376
GEMIN6	0.743219	5.85473	1.91878	0.0936069	0.338818	-4.69061	5.167764	5.798472	6.161107	6.291568
DOK3	0.742281	1.74157	2.00697	0.0819144	0.32441	-4.56702	1.532197	1.208652	2.279226	1.946185
FBXL18	0.742073	3.4306	1.51821	0.169809	0.429351	-5.22498	3.504472	2.614647	4.291560	3.311704
ID2	0.741799	1.4984	1.96111	0.0878052	0.331476	-4.63149	1.235797	1.019208	1.612757	2.125845
GADD45G	0.741644	0.907064	2.02569	0.0796218	0.321899	-4.54058	0.3443263	0.7281573	1.3599483	1.1958234
ZNF142	0.741136	3.34867	1.43097	0.192642	0.453021	-5.33347	3.623920	2.332281	4.081522	3.356951
MPZ	0.741003	3.95308	1.98586	0.084576	0.327587	-4.59674	3.346746	3.818412	4.409999	4.237165
CITED2	0.739738	6.51083	2.00706	0.0819027	0.32441	-4.56689	6.017824	6.264105	7.068237	6.693169
TSSK3	0.73892	0.83715	1.84193	0.105099	0.354144	-4.79688	0.6725442	0.2628365	1.5271494	0.8860709
PLK3	0.738887	4.91868	1.87308	0.100285	0.348055	-4.75397	4.357630	4.740852	5.584730	4.991525
IQSEC2	0.738331	1.48876	1.97754	0.0856486	0.328929	-4.60844	1.2539575	0.9852358	2.0715795	1.6442752
MBLAC1	0.737877	1.8898	1.84831	0.104094	0.353086	-4.7881	1.356213	1.685503	2.592997	1.924473
PPP2R5D	0.737579	4.84253	1.97935	0.0854136	0.328864	-4.60589	4.275307	4.672165	5.360646	5.061984
ANKRD37	0.736243	1.48386	1.95147	0.089095	0.333545	-4.64499	0.8679313	1.3635505	1.7364283	1.9675403
SLC9A3R1	0.732628	4.1644	2.00412	0.0822692	0.324434	-4.57104	3.634738	3.961429	4.654607	4.406816
PCDHB2	0.732548	1.757	2.06432	0.0750885	0.314691	-4.48584	1.294999	1.486444	2.185520	2.061020
SLC29A3	0.732296	1.75779	1.98644	0.0845017	0.327587	-4.59593	1.179131	1.604157	2.197354	2.050525
DACT3	0.730233	0.532331	2.04552	0.077263	0.318227	-4.51252	0.2091874	0.1252415	1.0277597	0.7671345
FAAP24	0.729423	2.87605	1.86283	0.101845	0.350236	-4.76812	2.171549	2.851127	3.265880	3.215643
CRABP2	0.729317	1.53208	2.06964	0.0744844	0.313397	-4.47828	1.246926	1.087922	1.885004	1.908477
ATP6V0C	0.727957	7.69546	1.8353	0.106151	0.355447	-4.80598	7.486722	7.176243	8.386601	7.732277
TNRC18	0.726878	4.54359	1.27495	0.240293	0.49929	-5.51823	4.884978	3.475318	5.421952	4.392099
CCDC134	0.726681	1.95925	1.8878	0.0980853	0.344573	-4.73361	1.527257	1.664563	2.625913	2.019269
RPRM	0.726639	0.538958	2.0188	0.0804585	0.322437	-4.55032	0.1888161	0.1624618	1.0650925	0.7394630
ELOVL3	0.726452	0.655243	2.07428	0.0739615	0.312701	-4.47168	0.2660369	0.3179979	1.0255654	1.0113725
ADI1	0.725493	4.71577	1.87978	0.0992787	0.346742	-4.74472	4.037409	4.668638	5.072500	5.084532
BANF1	0.72502	1.24614	1.98507	0.0846781	0.327587	-4.59786	0.7763735	0.9908908	1.7808010	1.4365024
MAP3K9	0.724447	1.47852	1.95031	0.0892506	0.333585	-4.6466	1.3150545	0.9175295	1.9780392	1.7034379
PCDHB5	0.724193	2.23704	2.03735	0.0782266	0.319648	-4.52409	1.921621	1.828265	2.710745	2.487527
DNASE1	0.723966	3.05783	1.75527	0.119674	0.372141	-4.91484	3.050863	2.340823	3.650477	3.189141
FUCA1	0.723875	4.10192	2.06732	0.0747474	0.313867	-4.48158	3.741862	3.738099	4.440498	4.487213
FBXL8	0.723551	2.35032	1.73912	0.122593	0.374956	-4.93658	2.353717	1.623367	2.951013	2.473173
PLIN3	0.723498	5.16	1.66635	0.136601	0.391998	-5.03353	4.322273	5.274225	5.669696	5.373800
C11orf95	0.722523	2.32413	1.70983	0.128062	0.381875	-4.97582	2.179288	1.746449	3.090593	2.280192
ANG	0.722484	1.06215	1.90065	0.096203	0.342594	-4.7158	0.4565501	0.9452612	1.2711879	1.5755910
AGTRAP	0.722473	5.99214	1.67963	0.133937	0.389213	-5.01596	5.148738	6.113065	6.406357	6.300392
JRK	0.722179	3.5969	1.73804	0.122792	0.375169	-4.93804	3.488187	2.983437	4.311670	3.604313
MAPK13	0.722151	1.2836	2.00297	0.0824124	0.324434	-4.57266	1.088292	0.756753	1.615706	1.673641
ISG15	0.72207	5.17281	1.66892	0.136081	0.391282	-5.03013	4.320516	5.303027	5.580027	5.487657
CHST12	0.721905	3.31202	1.86752	0.101128	0.349159	-4.76164	2.790632	3.111497	3.948082	3.397856
WDR97	0.721588	0.915386	1.90193	0.0960177	0.342318	-4.71403	0.8149995	0.2941850	1.3901463	1.1622146
LYNX1	0.721258	0.771604	1.92676	0.092485	0.337648	-4.67949	0.5125255	0.3094253	1.3691717	0.8952946
UBL4B	0.72095	0.718722	2.00512	0.0821436	0.324434	-4.56962	0.2847973	0.4316957	1.2215069	0.9368863
SLC25A42	0.720789	3.27841	1.92098	0.0932962	0.338645	-4.68754	2.917873	2.918163	3.901373	3.376242
NMNAT1	0.720383	2.5147	1.93559	0.091259	0.335755	-4.66717	2.349355	1.959664	3.024635	2.725150
YIF1A	0.720338	6.0647	1.6935	0.131209	0.385064	-4.99757	5.249642	6.159417	6.538797	6.310936
S1PR3	0.719223	0.427365	2.0549	0.0761703	0.31639	-4.49921	0.07896834	0.05653786	0.79286828	0.78108362
EMILIN2	0.718886	3.08329	1.95877	0.0881166	0.331924	-4.63477	2.657263	2.790439	3.646664	3.238810
ASIC3	0.718847	2.82816	1.59624	0.151493	0.410371	-5.12519	2.986022	1.951461	3.373626	3.001550
BFSP1	0.717768	2.04487	1.83212	0.10666	0.356498	-4.81034	1.344416	2.027560	2.400159	2.407353
NKIRAS2	0.714962	6.35388	1.90566	0.0954787	0.341442	-4.70885	5.863864	6.128934	6.937763	6.484959
GPR75	0.714261	1.98585	1.37245	0.209448	0.4689	-5.40424	2.189731	1.067700	1.849656	2.836297
AKAP8	0.712571	4.7201	2.0214	0.0801423	0.322106	-4.54666	4.392196	4.335435	5.153771	4.999002
MRGPRD	0.711744	0.589841	1.92087	0.0933117	0.338645	-4.6877	0.4679384	0.0000000	0.9781465	0.9132800
SETD1A	0.711007	4.30078	1.53862	0.164834	0.424156	-5.19912	4.392996	3.497559	5.033284	4.279284
TBC1D17	0.710091	4.25489	1.87631	0.099799	0.34748	-4.74951	3.869146	3.930544	4.887712	4.332161
DEDD2	0.709786	5.28323	1.56678	0.158185	0.41703	-5.16316	4.394816	5.461853	5.801430	5.474811
SH2B1	0.709352	4.27767	1.84276	0.104968	0.354144	-4.79574	4.159240	3.686745	4.834636	4.430053
SLC16A11	0.707809	0.370153	1.96446	0.0873605	0.331224	-4.62679	0.03249733	0.00000000	0.88964999	0.55846566
PCDHGC3	0.707545	3.27548	1.85614	0.102876	0.351439	-4.77733	2.976968	2.866454	3.917142	3.341371
KCNJ14	0.70743	3.16122	1.51602	0.170351	0.429489	-5.22774	3.303138	2.311872	3.850709	3.179161
CCER2	0.707361	1.11968	1.86665	0.101262	0.349159	-4.76286	1.0332128	0.4987929	1.5634450	1.3832822
MAMSTR	0.704581	0.88571	1.93205	0.091749	0.336483	-4.67211	0.3440209	0.7228174	1.2991576	1.1768422
PVRL1	0.704563	2.60034	1.62323	0.145591	0.402944	-5.09012	2.572448	1.923673	3.330493	2.574755
TST	0.704145	4.56867	1.61648	0.147045	0.404241	-5.09891	3.742927	4.690262	5.090230	4.751247
BLVRB	0.7041	5.64949	1.42059	0.195531	0.454296	-5.34614	4.632846	5.962042	6.148760	5.854327
TPP1	0.703943	5.301	1.74557	0.121419	0.373771	-4.92791	5.320053	4.577998	5.768818	5.537120
PDE4C	0.703934	0.515761	2.0068	0.0819357	0.32441	-4.56726	0.1635719	0.1640162	0.9145544	0.8209010
IL17RA	0.70327	2.37447	1.89706	0.0967253	0.342658	-4.72078	2.048648	1.997025	2.961983	2.490230
UNC119	0.703074	4.56443	1.86523	0.101478	0.349594	-4.76481	4.030940	4.394851	5.117694	4.714246
MPL	0.702773	0.538257	1.97786	0.0856077	0.328929	-4.608	0.3061320	0.0676084	0.8960932	0.8831927
TUBA8	0.702334	1.90755	1.87913	0.0993752	0.346931	-4.74561	1.423412	1.689356	2.475814	2.041622
ATG14	0.70077	2.86419	1.90236	0.0959557	0.342286	-4.71343	2.736441	2.291161	3.199960	3.229182
YJEFN3	0.699792	4.49008	1.43214	0.192317	0.452588	-5.33203	4.771241	3.509123	5.037957	4.641990
STKLD1	0.699344	1.4007	1.917	0.0938582	0.339151	-4.69308	1.2169771	0.8850693	1.8618584	1.6388759
GPC1	0.699035	4.47442	1.8316	0.106743	0.356582	-4.81105	4.029433	4.220370	5.103475	4.544397
BAHD1	0.698309	4.04396	1.80019	0.111894	0.363954	-4.85396	3.641786	3.747832	4.713351	4.072884
CYB5R1	0.698046	6.0059	1.83544	0.106128	0.355447	-4.80578	5.397986	5.915765	6.482970	6.226873
BAIAP2L1	0.697356	3.27957	1.81562	0.109335	0.36063	-4.83291	3.187830	2.673958	3.796326	3.460173
ADCK3	0.697245	5.50694	1.79299	0.113107	0.365333	-4.86375	4.912635	5.404003	6.074231	5.636897
NHEJ1	0.696322	2.8559	1.8556	0.102959	0.351475	-4.77807	2.246128	2.769357	3.179660	3.228467
LZTS2	0.69563	5.90702	1.84377	0.104808	0.354144	-4.79435	5.417600	5.700803	6.488798	6.020864
SERINC4	0.693223	1.164	1.91184	0.094593	0.340247	-4.70027	1.0014867	0.6332888	1.5065181	1.5147040
IRX5	0.692061	2.14076	1.88701	0.098203	0.344573	-4.73472	1.907276	1.682180	2.667457	2.306122
MBOAT4	0.691369	0.445406	1.92995	0.09204	0.337147	-4.67504	0.1994425	0.0000000	0.6809482	0.9012326
ZNF296	0.691363	3.08298	1.68978	0.131935	0.386226	-5.00251	2.951528	2.523062	3.779552	3.077764
EID3	0.690326	0.719781	1.78451	0.114554	0.367078	-4.87528	0.66582990	0.08340644	0.93283094	1.19705720
POMK	0.690051	2.36731	1.36126	0.212802	0.47326	-5.41757	2.598644	1.445927	2.295545	3.129129
C15orf39	0.688718	3.06186	1.51826	0.169796	0.429351	-5.22491	3.153569	2.281433	3.757215	3.055223
CASP6	0.688377	2.34627	1.95257	0.0889468	0.333248	-4.64345	1.986060	2.018095	2.609025	2.771884
MCOLN1	0.687987	4.72306	1.76385	0.118149	0.370647	-4.90326	4.087654	4.670486	5.230454	4.903658
HSPA12B	0.686475	0.615361	1.79137	0.113384	0.365522	-4.86596	0.3923717	0.1518752	1.2365994	0.6805977
SPG7	0.685668	3.53293	1.8678	0.101086	0.349159	-4.76126	3.378628	3.001574	3.979332	3.772205
CCDC13	0.685264	0.421616	1.94271	0.0902829	0.334757	-4.65723	0.1579676	0.0000000	0.7304166	0.7980787
RAB26	0.684937	2.93394	1.7947	0.112819	0.364955	-4.86143	2.431505	2.751429	3.524686	3.028122
KBTBD4	0.684254	3.9715	1.70043	0.129865	0.383591	-4.98835	3.256659	4.002079	4.411233	4.216012
ALG3	0.683961	4.80566	1.73999	0.122434	0.374956	-4.93541	4.676361	4.251006	5.422105	4.873185
PLEKHO1	0.683657	2.83395	1.71774	0.126563	0.380612	-4.96525	2.173417	2.810826	3.359123	2.992435
TFAP2E	0.682234	0.794694	1.82684	0.107508	0.358388	-4.81756	0.6442078	0.2629460	1.3019966	0.9696249
FAM84A	0.682073	0.488314	1.938	0.0909278	0.335721	-4.66381	0.1079979	0.1865579	0.8905674	0.7681338
CACFD1	0.681563	2.30706	1.83492	0.106211	0.355447	-4.80649	1.951224	1.981332	2.888884	2.406799
CABYR	0.681396	1.38998	1.72668	0.124889	0.378223	-4.95328	1.371771	0.726793	1.585285	1.876070
POM121	0.681269	3.38649	1.24111	0.251871	0.508861	-5.55656	3.707136	2.384571	4.212300	3.241944
SOX15	0.68108	2.45934	1.80265	0.111483	0.363923	-4.85061	2.324920	1.912672	2.983791	2.615960
CORT	0.680153	0.904142	1.77882	0.115534	0.367781	-4.883	0.8490161	0.2791140	1.3342083	1.1542279
ZFYVE19	0.67925	2.39403	1.81801	0.108944	0.360194	-4.82965	1.860595	2.248206	2.897619	2.569682
NLGN2	0.679218	3.47854	1.46629	0.183086	0.443523	-5.28996	3.588838	2.689033	4.197691	3.438615
TRIM21	0.678688	2.44937	1.63923	0.142193	0.399311	-5.0692	1.683185	2.536867	2.832896	2.744533
GPATCH3	0.678275	4.79836	1.63791	0.14247	0.399499	-5.07093	4.064028	4.854410	5.305497	4.969491
TANGO2	0.678075	2.10588	1.83597	0.106044	0.355362	-4.80505	1.559394	1.974288	2.541915	2.347917
CATSPERG	0.677813	0.797439	1.91137	0.0946592	0.34032	-4.70091	0.4104058	0.5066593	1.2367515	1.0359400
CBR1	0.677806	5.25399	1.53864	0.164829	0.424156	-5.1991	4.408389	5.421795	5.704946	5.480850
PTPRU	0.67754	2.87093	1.76656	0.117672	0.370442	-4.8996	2.414897	2.649427	3.490640	2.928764
F11R	0.676062	3.47859	1.76167	0.118535	0.370801	-4.90621	2.924396	3.356713	4.032495	3.600738
ABCB9	0.675304	4.64785	1.77512	0.116174	0.3689	-4.88801	4.041521	4.578885	5.092975	4.878038
SIDT2	0.675248	3.33702	1.8207	0.108505	0.359647	-4.82597	3.005951	2.992841	3.912768	3.436521
FLJ45513	0.674518	0.992622	1.77321	0.116507	0.369297	-4.8906	0.9411105	0.3696157	1.3745305	1.2852319
FBXO41	0.674139	3.22604	1.61042	0.148363	0.406133	-5.10679	3.182509	2.595435	3.898263	3.227959
VPS9D1	0.673769	3.62153	1.75442	0.119826	0.372265	-4.91599	3.359478	3.209804	4.255954	3.660865
TMEM91	0.673717	2.24823	1.8984	0.0965301	0.342658	-4.71892	1.934742	1.887995	2.697155	2.473016
GPR35	0.673259	1.17443	1.80015	0.111901	0.363954	-4.85401	1.0533835	0.6222189	1.6490224	1.3730982
GSE1	0.672036	3.28846	1.35998	0.213189	0.47372	-5.41909	3.548952	2.355938	3.943861	3.305101
RRAD	0.671589	0.732931	1.86623	0.101326	0.349258	-4.76343	0.5582931	0.2359799	1.0914644	1.0459858
LBHD1	0.671181	2.53749	1.65148	0.139642	0.396536	-5.05312	2.538119	1.865679	3.091257	2.654903
ZNF587	0.670702	2.81239	1.6092	0.148631	0.406456	-5.10838	2.915055	2.039018	3.178068	3.117409
RUSC1	0.669786	3.60098	1.78688	0.114148	0.366381	-4.87206	3.089048	3.443126	4.126966	3.744780
TNK1	0.669484	1.95215	1.71386	0.127296	0.381202	-4.97044	1.511665	1.723141	2.606495	1.967279
PPM1N	0.669107	1.87213	1.75631	0.119487	0.372117	-4.91344	1.354211	1.720952	2.434015	1.979361
CCDC167	0.669045	4.54797	1.49227	0.176331	0.435674	-5.2576	3.679047	4.747840	4.981785	4.783192
PPFIA4	0.668057	0.888096	1.85224	0.103481	0.352221	-4.7827	0.5907483	0.5173861	1.3874669	1.0567816
SUOX	0.667095	3.59562	1.76796	0.117425	0.370387	-4.8977	3.024831	3.499318	4.065597	3.792742
C15orf62	0.666668	1.46988	1.75195	0.120269	0.372734	-4.91932	1.3892981	0.8837999	1.9451717	1.6612617
MAGEH1	0.665732	3.66245	1.79113	0.113423	0.365522	-4.86628	3.130105	3.529061	4.133926	3.856704
FAM78B	0.665516	2.73399	1.82365	0.108025	0.359081	-4.82194	2.391492	2.410981	3.267302	2.866202
B3GALT4	0.665489	0.474847	1.89364	0.0972264	0.343588	-4.72553	0.1279314	0.1562735	0.8686993	0.7464835
MAST3	0.664808	2.07827	1.42758	0.193579	0.453305	-5.33761	2.180286	1.311438	2.818526	2.002813
SOWAHD	0.664417	0.496559	1.80901	0.110424	0.36252	-4.84194	0.1078508	0.2208500	1.0375319	0.6200026
ZNF774	0.663981	1.51236	1.74001	0.122431	0.374956	-4.93539	1.4675437	0.8931869	1.9123302	1.7763625
SRD5A1	0.663873	3.70201	1.86809	0.101043	0.349159	-4.76087	3.273832	3.466306	3.962168	4.105716
ANXA9	0.663728	2.81415	1.67906	0.13405	0.389213	-5.01672	2.572816	2.391759	3.490876	2.801156
CREBBP	0.66295	3.38493	1.03742	0.331734	0.579585	-5.77231	4.045529	2.061389	4.018307	3.414511
PTCHD4	0.661172	1.69011	1.61814	0.146686	0.404043	-5.09674	1.354626	1.364422	1.611646	2.429745
PLCD4	0.660992	2.73692	1.33172	0.221888	0.481405	-5.45247	3.024530	1.788315	3.357134	2.777694
UFSP1	0.660804	3.67249	1.76613	0.117747	0.370488	-4.90017	3.267453	3.416717	4.248580	3.757197
STAT2	0.660781	4.23837	1.75584	0.119573	0.372141	-4.91408	4.085318	3.730638	4.770358	4.367160
SLC38A7	0.660752	3.62675	1.80249	0.111508	0.363923	-4.85082	3.339852	3.252898	4.164342	3.749913
FBXL19	0.660227	4.67748	1.70451	0.129079	0.383268	-4.98291	4.214088	4.480642	5.300759	4.714426
CDA	0.658498	0.742207	1.87315	0.100276	0.348055	-4.75388	0.3776557	0.4482598	1.1260925	1.0168184
FBXL7	0.656954	1.96377	1.54733	0.16275	0.422244	-5.18803	2.091661	1.178930	2.387834	2.196666
GJB4	0.656184	0.652272	1.77883	0.115532	0.367781	-4.88299	0.5205875	0.1277718	0.8679417	1.0927860
SWSAP1	0.655711	2.50501	1.73834	0.122737	0.375109	-4.93764	2.174058	2.180245	3.105907	2.559817
UFD1L	0.655541	4.05997	1.64406	0.141181	0.398155	-5.06286	3.366104	4.098303	4.329794	4.445695
TFG	0.655456	3.50963	1.86207	0.101962	0.35041	-4.76916	3.244507	3.119292	3.798334	3.876378
DAPK3	0.655309	5.87037	1.60578	0.14938	0.407336	-5.11282	5.209442	5.875990	6.431948	5.964103
EFR3B	0.654968	0.515432	1.86966	0.100803	0.348848	-4.75869	0.1859507	0.1899458	0.8740836	0.8117486
SRRM5	0.654526	1.05282	1.61796	0.146726	0.404043	-5.09699	1.0809030	0.3702175	1.5493730	1.2108001
NPIPA5	0.654399	0.965801	1.57779	0.155653	0.414639	-5.14901	1.0629708	0.2142331	1.3725561	1.2134456
TMEM221	0.654211	0.653256	1.80316	0.111397	0.363923	-4.84991	0.4681451	0.1841568	1.1001209	0.8606024
WDR55	0.653628	4.69582	1.77618	0.115991	0.368574	-4.88658	4.378166	4.359854	5.243244	4.802032
EZR	0.652873	6.0356	1.78013	0.115308	0.367735	-4.88122	5.496590	5.921735	6.373745	6.350326
CARD9	0.652659	1.00748	1.8176	0.109009	0.360199	-4.8302	0.8244720	0.5378242	1.3955871	1.2720281
TPRG1L	0.652044	5.49324	1.5722	0.156932	0.416095	-5.15619	4.754843	5.579596	5.946879	5.691648
LMTK2	0.651389	3.24985	1.33469	0.220961	0.481279	-5.44899	3.576664	2.271642	3.673023	3.478062
ADGRG5	0.651316	0.470004	1.84073	0.105289	0.354316	-4.79853	0.1399860	0.1487050	0.8970912	0.6942321
PANO1	0.651296	0.777845	1.77588	0.116043	0.368574	-4.88698	0.3997745	0.5046185	1.3097576	0.8972280
ATP6V0E1	0.65109	6.85681	1.58882	0.153152	0.412556	-5.13478	6.122484	6.940038	7.119693	7.245008
F8A1	0.65015	1.89721	1.65796	0.138308	0.394668	-5.04459	1.622375	1.521886	2.561763	1.882799
ALDH1L1	0.6498	0.442022	1.83972	0.105447	0.354663	-4.7999	0.06562858	0.16861544	0.84422582	0.68961768
PADI4	0.649307	0.351876	1.71455	0.127165	0.381166	-4.96951	0.00000000	0.05444594	0.95595518	0.39710385
ADAM8	0.649083	2.09398	1.47961	0.179592	0.439305	-5.2734	2.214429	1.324440	2.673859	2.163176
SCT	0.64887	1.34208	1.84941	0.103923	0.352785	-4.78659	1.023686	1.011604	1.617925	1.715105
ARMC5	0.648712	3.08226	1.66975	0.135915	0.39125	-5.02904	2.929862	2.585943	3.685087	3.128142
RERE	0.647991	3.63758	0.98337	0.355991	0.599542	-5.82484	4.288773	2.338391	4.432268	3.490877
BAZ2A	0.64745	5.17837	1.46128	0.184413	0.444803	-5.29616	5.313551	4.395739	5.761265	5.242926
FAM168A	0.647204	4.16469	1.61078	0.148285	0.406005	-5.10632	4.188101	3.494068	4.650107	4.326470
FAM189A2	0.647065	0.873134	1.7589	0.119026	0.371403	-4.90994	0.7024082	0.3967948	1.3550248	1.0383088
TM4SF19	0.646347	3.8209	1.78555	0.114376	0.366927	-4.87387	3.318448	3.676998	4.154747	4.133391
PNMAL1	0.646323	5.05896	1.82694	0.107493	0.358388	-4.81743	4.834539	4.637067	5.362302	5.401950
ARID3A	0.646187	1.92836	1.77086	0.116917	0.369696	-4.89377	1.585245	1.625294	2.450985	2.051928
DAPK1	0.645649	0.845432	1.84214	0.105065	0.354144	-4.79659	0.5560490	0.4891667	1.1861717	1.1503426
PRR12	0.645378	3.69402	1.10126	0.304768	0.557387	-5.70761	4.093965	2.648690	4.572513	3.460900
C1orf228	0.645293	0.642526	1.68823	0.132238	0.386811	-5.00456	0.3685925	0.2711664	0.6709983	1.2593463
ZNF628	0.644728	2.17458	1.33172	0.221889	0.481405	-5.45247	2.367177	1.337249	2.891622	2.102259
PSMB5	0.64461	7.41347	1.39481	0.20288	0.46177	-5.3774	6.521768	7.660556	7.871848	7.599695
TM7SF2	0.644552	2.07627	1.63704	0.142653	0.399835	-5.07206	1.996267	1.511714	2.651084	2.146000
TMEM19	0.644525	2.51523	1.64035	0.141957	0.398981	-5.06773	2.369037	2.016905	2.539037	3.135956
PCYT1B	0.644401	0.984933	1.80123	0.111719	0.363954	-4.85254	0.5433124	0.7821521	1.2263014	1.3879647
ZFP36	0.644162	4.93605	1.49657	0.175232	0.435052	-5.2522	4.994840	4.233093	5.560048	4.956208
SLC47A1	0.643691	0.988244	1.83476	0.106236	0.355447	-4.80671	0.6201622	0.7126347	1.3243080	1.2958707
TBX6	0.641398	1.1057	1.65297	0.139334	0.396183	-5.05116	1.0001098	0.5698954	1.6702048	1.1825961
FOXO4	0.63967	3.21085	1.69716	0.130497	0.384443	-4.9927	2.728204	3.053824	3.747956	3.313411
SLC17A5	0.639227	2.63464	1.77467	0.116252	0.368964	-4.88861	2.202494	2.427550	2.832936	3.075561
MST1R	0.63886	0.868772	1.71183	0.127682	0.381463	-4.97315	0.5916232	0.5070606	1.4361508	0.9402521
CCND3	0.638179	4.17133	1.58203	0.154686	0.414163	-5.14354	3.547716	4.156772	4.732716	4.248130
SLC26A6	0.638054	3.86347	1.72462	0.125272	0.378957	-4.95603	3.558480	3.530396	4.414920	3.950065
DPYSL5	0.637808	1.21653	1.71268	0.12752	0.381378	-4.97201	0.7172518	1.0779937	1.7042200	1.3666420
MLLT11	0.636804	5.83188	1.70235	0.129494	0.383439	-4.98579	5.517447	5.509516	5.893975	6.406596
SNCA	0.63664	2.05577	1.80351	0.111338	0.363923	-4.84943	1.713296	1.761602	2.287495	2.460683
XPNPEP3	0.63636	1.89514	1.51697	0.170114	0.429351	-5.22654	2.024019	1.129904	2.250944	2.175700
ARHGAP31	0.635334	2.16678	1.80931	0.110375	0.36252	-4.84153	1.810765	1.887453	2.443118	2.525769
CCDC96	0.634813	1.27199	1.58182	0.154734	0.414163	-5.14381	0.7054622	1.2036963	1.8776695	1.3011144
TRIM68	0.634708	3.2687	1.67906	0.134052	0.389213	-5.01673	2.709151	3.193547	3.720966	3.451148
NWD1	0.634623	0.418598	1.7878	0.113991	0.3663	-4.87082	0.11513113	0.08744131	0.85058818	0.62123078
FAM53C	0.633576	4.89661	1.57838	0.155518	0.414639	-5.14825	4.223206	4.936434	5.348559	5.078233
MRGPRX4	0.633405	2.47586	1.6312	0.143887	0.400768	-5.0797	1.844956	2.473356	2.704254	2.880870
HOXC6	0.632318	4.46773	1.70333	0.129305	0.383439	-4.98448	4.128304	4.174840	5.023017	4.544763
SAP130	0.631899	2.90705	1.55406	0.161157	0.420764	-5.17944	2.904563	2.277630	3.473981	2.972011
CCDC151	0.631258	1.11427	1.734	0.123534	0.376138	-4.94346	0.7092799	0.8879927	1.6027888	1.2569996
SLC26A1	0.629393	2.15094	1.3439	0.218103	0.479022	-5.43814	2.352050	1.320442	2.779194	2.152085
UNC5CL	0.629154	1.16421	1.7511	0.120422	0.373028	-4.92047	1.0075072	0.6917492	1.4822946	1.4752694
ACTG1	0.628959	10.5586	1.70163	0.129633	0.383439	-4.98675	10.15279	10.33551	11.08504	10.66118
FAM63A	0.62854	3.65089	1.63401	0.143292	0.400357	-5.07602	3.231004	3.442243	4.256311	3.674016
DNAJC22	0.627691	3.00291	1.75091	0.120456	0.373043	-4.92072	2.796463	2.581673	3.422844	3.210675
GRK5	0.627572	2.45372	1.72845	0.12456	0.377641	-4.95091	1.961508	2.318353	2.825872	2.709132
FDXR	0.62717	6.00679	1.42441	0.194463	0.453618	-5.34148	5.204460	6.181945	6.492705	6.148041
FETUB	0.626917	0.687585	1.72026	0.126088	0.380143	-4.96187	0.2337903	0.5144634	0.8623566	1.1397309
ABCA7	0.626645	1.41609	1.68769	0.132345	0.386894	-5.00528	1.2358426	0.9696931	1.9300011	1.5288246
MDM2	0.626488	4.04371	0.961788	0.366048	0.608124	-5.84522	4.317143	3.143788	3.467543	5.246365
ACTRT3	0.625441	0.804294	1.75039	0.12055	0.373062	-4.92143	0.5976825	0.3854657	1.0256153	1.2084142
CHADL	0.624517	0.501785	1.71608	0.126876	0.380849	-4.96747	0.2367625	0.1422909	1.0019297	0.6261580
NR1I3	0.623296	1.30637	1.67452	0.134956	0.390393	-5.02273	1.1879240	0.8015152	1.7702963	1.4657349
DDO	0.622232	1.83244	1.54902	0.162347	0.422078	-5.18587	1.671546	1.371098	1.791799	2.495310
SLC16A8	0.62214	1.07879	1.55929	0.159929	0.419158	-5.17275	1.1315907	0.4038539	1.4657602	1.3139651
ANKRD11	0.621625	5.31725	1.17473	0.275945	0.531507	-5.62978	5.769681	4.243192	5.728265	5.527858
CYGB	0.62141	0.495201	1.77308	0.11653	0.369297	-4.89078	0.2038422	0.1651499	0.7740651	0.8377463
ZMIZ1	0.619301	4.06004	1.06306	0.320687	0.570849	-5.74667	4.538480	2.962307	4.811052	3.928338
AAED1	0.618659	2.67634	1.74266	0.121949	0.374355	-4.93183	2.354224	2.379804	2.870476	3.100870
THEMIS2	0.618493	1.08847	1.7446	0.121595	0.37393	-4.92922	0.7601176	0.7983394	1.5061512	1.2892909
HELZ2	0.617478	2.67929	1.11669	0.298521	0.552157	-5.69156	3.108603	1.632495	3.368400	2.607653
HSPB9	0.617197	0.355188	1.71731	0.126645	0.380629	-4.96583	0.0931796	0.0000000	0.8156320	0.5119418
KEL	0.616618	0.498055	1.75945	0.118929	0.371193	-4.90921	0.1945707	0.1849202	0.7697142	0.8430136
SSBP3	0.61655	2.33785	1.71424	0.127223	0.381199	-4.96992	2.029407	2.029750	2.807193	2.485063
CCDC116	0.615909	0.487263	1.72516	0.125172	0.37887	-4.95532	0.2477705	0.1108461	0.9140418	0.6763931
KANK2	0.615406	3.54673	1.66913	0.136039	0.39125	-5.02986	3.212929	3.265118	4.078070	3.630790
S100A4	0.615155	8.16791	1.23397	0.254374	0.511507	-5.56457	7.201443	8.519214	8.675482	8.275485
PLA2G15	0.615132	3.0941	1.64728	0.140511	0.397167	-5.05864	2.583264	2.989800	3.551883	3.251445
CDK5R2	0.614936	0.776857	1.58941	0.153019	0.412556	-5.13401	0.5091490	0.4296289	1.4018572	0.7667929
CNP	0.614611	5.07681	1.53464	0.165793	0.425247	-5.20418	4.430221	5.108793	5.550141	5.218096
AP5Z1	0.614509	4.09865	1.64115	0.14179	0.398816	-5.06668	3.746899	3.835883	4.660380	4.151420
LOC101928841	0.614479	0.819284	1.71797	0.126519	0.38057	-4.96494	0.5280506	0.4960378	1.2691013	0.9839445
TCN2	0.614089	2.28417	1.62382	0.145463	0.402706	-5.08934	1.771187	2.183057	2.778043	2.404377
QRICH2	0.613858	0.99635	1.67842	0.134178	0.389316	-5.01757	0.8200277	0.5588139	1.4628170	1.1437397
MAML1	0.613695	4.24148	1.46946	0.18225	0.442958	-5.28603	4.262786	3.606488	4.844546	4.252118
PMEL	0.613171	0.559983	1.75048	0.120533	0.373062	-4.9213	0.2460213	0.2607730	0.8373365	0.8958008
MYH14	0.612863	1.69672	1.69565	0.130789	0.384722	-4.9947	1.261134	1.519449	2.121725	1.884584
FBXO44	0.611793	3.15789	1.60747	0.149011	0.407033	-5.11063	2.600653	3.103325	3.608871	3.318692
FRAT1	0.611624	2.41754	1.53123	0.166618	0.426337	-5.2085	1.881810	2.341650	3.017673	2.429034
PLEKHO2	0.611465	3.66891	1.5496	0.162211	0.422078	-5.18514	3.035879	3.690467	4.108511	3.840765
SF3B4	0.610852	7.41941	1.60576	0.149386	0.407336	-5.11285	7.221974	7.005986	7.993234	7.456430
PRR15L	0.610691	0.420087	1.73049	0.124182	0.377447	-4.94817	0.14848017	0.08100361	0.80716986	0.64369526
SMIM6	0.609725	0.571761	1.69321	0.131265	0.385064	-4.99795	0.1364455	0.3973520	0.9771681	0.7760790
GDPGP1	0.609439	2.11586	1.68753	0.132376	0.386896	-5.00549	1.752606	1.869671	2.583446	2.257709
ASPHD1	0.609295	3.73942	1.60644	0.149237	0.407336	-5.11197	3.192845	3.676703	4.192209	3.895929
TAF1C	0.608453	4.60445	1.43799	0.190708	0.450959	-5.32487	4.659553	3.940892	5.197948	4.619403
KRT17	0.607628	0.60105	1.70317	0.129336	0.383439	-4.9847	0.2414102	0.3530618	0.7823391	1.0273885
PML	0.606354	3.35685	1.33435	0.221066	0.481279	-5.44938	3.436385	2.670961	4.071857	3.248197
SMG8	0.606162	4.57958	1.72991	0.12429	0.377571	-4.94896	4.272716	4.280279	4.848085	4.917235
WDR37	0.60588	3.02864	1.51913	0.169582	0.429279	-5.22382	3.091026	2.360381	3.396618	3.266549
HOGA1	0.603607	0.668751	1.70304	0.129361	0.383439	-4.98487	0.2611901	0.4727040	0.9970415	0.9440666
RRBP1	0.603345	4.93409	1.49852	0.174739	0.434329	-5.24976	4.988196	4.276640	5.385930	5.085597
PRICKLE3	0.603296	3.72177	1.61821	0.146671	0.404043	-5.09665	3.439795	3.400442	4.271991	3.774837
SERPINF2	0.602879	1.29291	1.59613	0.151517	0.410371	-5.12534	0.8509896	1.1319504	1.8315604	1.3571370
LRRN4	0.60209	0.456419	1.70374	0.129226	0.383414	-4.98393	0.1878591	0.1228890	0.6676347	0.8472931
C1orf226	0.601873	2.31955	1.52883	0.167202	0.426976	-5.21154	2.275248	1.761982	2.858127	2.382849
JMJD6	0.601667	3.78711	1.65709	0.138487	0.394919	-5.04574	3.497145	3.475400	4.275377	3.900502
SYCE1L	0.601626	0.638432	1.64494	0.140998	0.397886	-5.06171	0.3007527	0.3744859	1.1421591	0.7363322
CKM	0.600858	0.473865	1.63128	0.143871	0.400768	-5.0796	0.3468719	0.0000000	0.9143221	0.6342660
MSL1	0.600603	4.23719	1.42379	0.194637	0.453618	-5.34224	4.371652	3.502119	4.677726	4.397252
WIZ	0.600574	4.95746	1.2819	0.23797	0.497058	-5.51027	5.096773	4.217570	5.672123	4.843368
MMP12	0.599524	0.348134	1.4215	0.195278	0.454122	-5.34504	0.03115069	0.06559332	0.19167424	1.10411772
NDRG3	0.599506	4.62349	1.63799	0.142454	0.399499	-5.07082	4.151988	4.495489	5.040481	4.806008
RNF44	0.598496	4.49268	1.17676	0.275182	0.530894	-5.62759	4.802185	3.584670	5.168378	4.415468
TAOK2	0.597975	4.69655	1.62475	0.145264	0.402564	-5.08813	4.311502	4.483620	5.199172	4.791899
GAL3ST4	0.597908	1.88061	1.48193	0.178991	0.438872	-5.27051	1.663709	1.499609	2.560273	1.798862
BIN1	0.597643	1.51635	1.57795	0.155616	0.414639	-5.1488	0.9512319	1.4838341	1.9047643	1.7255868
CLP1	0.59636	5.58645	1.56067	0.159605	0.41896	-5.17098	4.999590	5.576956	5.957100	5.812165
GLA	0.595505	4.56036	1.40738	0.199265	0.458129	-5.36219	3.801346	4.723867	4.851958	4.864266
FGF22	0.595226	0.297613	1.68176	0.133516	0.388749	-5.01315	0.0000000	0.0000000	0.6979885	0.4924642
TCERG1L	0.594976	0.441335	1.69964	0.130017	0.383776	-4.9894	0.1500491	0.1376448	0.7553486	0.7222982
EHBP1L1	0.594208	5.25266	1.60465	0.149629	0.407677	-5.11429	5.014505	4.896610	5.777103	5.322429
ADGRE1	0.594082	1.88686	1.39426	0.203038	0.461914	-5.37806	1.119390	2.060241	2.152897	2.214897
PLAGL2	0.593105	3.40527	1.09033	0.309258	0.561931	-5.71889	3.855921	2.361523	4.008471	3.395182
LDB1	0.59266	5.37083	1.62773	0.144627	0.401757	-5.08424	5.006956	5.142052	5.850098	5.484229
CHST2	0.592652	1.85202	1.60032	0.150586	0.409324	-5.1199	1.356977	1.754410	2.273852	2.022839
ARHGAP30	0.592442	0.964749	1.67919	0.134025	0.389213	-5.01655	0.6124294	0.7246252	1.3276349	1.1943046
MYO15B	0.592386	1.31752	1.48452	0.178321	0.438174	-5.26728	1.2897014	0.7529457	1.8711719	1.3562469
B4GALT1	0.592299	5.59812	1.37553	0.208532	0.467868	-5.40056	5.587020	5.016921	6.288641	5.499899
KIFC2	0.592224	2.54748	1.47918	0.179706	0.439408	-5.27394	2.564443	1.938291	3.054074	2.633108
MMP15	0.591879	1.53654	1.56819	0.157857	0.416793	-5.16134	1.278318	1.202893	2.104090	1.560879
SPIRE2	0.5915	2.10983	1.53585	0.1655	0.42475	-5.20264	1.922774	1.705386	2.697923	2.113237
RNF34	0.591411	3.85614	1.67678	0.134505	0.390087	-5.01974	3.645894	3.474983	4.153527	4.150173
TBC1D16	0.590433	2.71942	1.60637	0.149252	0.407336	-5.11206	2.375839	2.472576	3.227235	2.802047
MAP1LC3A	0.590327	5.19242	1.58543	0.153918	0.413244	-5.13916	4.770676	5.023837	5.699336	5.275831
EPN3	0.590198	0.598662	1.66917	0.13603	0.39125	-5.0298	0.3704640	0.2366617	0.9656430	0.8218781
HOXB5	0.590048	2.84863	1.33799	0.219931	0.480914	-5.4451	3.012191	2.095028	3.389762	2.897554
ADAMTSL5	0.589946	2.61976	1.51175	0.171412	0.430162	-5.23313	2.607308	2.042272	3.094649	2.734823
GZMM	0.589847	0.852308	1.49451	0.175759	0.435293	-5.25479	0.8693095	0.2454602	1.3145203	0.9799428
KCTD21	0.589673	1.83069	1.67558	0.134744	0.390337	-5.02133	1.530729	1.540985	2.197626	2.053435
MYH3	0.589654	2.18222	1.27907	0.238916	0.497768	-5.51352	2.469120	1.305673	2.495619	2.458483
PHF13	0.589115	3.51839	1.54513	0.163275	0.422807	-5.19084	3.316668	3.130988	4.091414	3.534472
STAC3	0.587884	1.52429	1.4508	0.187223	0.447773	-5.30911	1.6208510	0.8398512	1.8852864	1.7511843
CTNS	0.587414	3.26729	1.64741	0.140484	0.397167	-5.05847	2.992438	2.954726	3.692343	3.429648
CCDC154	0.586049	0.666176	1.6179	0.146739	0.404043	-5.09707	0.5335130	0.2127898	1.0440179	0.8743824
VAMP1	0.585976	1.87218	1.51042	0.171745	0.430484	-5.23481	1.874864	1.283514	2.299623	2.030708
TMEM106A	0.585503	2.17612	1.57274	0.156809	0.416095	-5.1555	1.750596	2.016143	2.676368	2.261377
HMCES	0.585218	5.56454	1.50702	0.172594	0.431351	-5.23908	4.965567	5.578296	5.969957	5.744342
C16orf46	0.584825	1.41751	1.65809	0.138281	0.394668	-5.04442	1.100301	1.149901	1.791762	1.628090
CCDC87	0.58392	0.515503	1.59825	0.151046	0.409963	-5.12259	0.1359543	0.3111307	0.9912585	0.6236673
HYAL1	0.583316	0.650009	1.54088	0.164291	0.423945	-5.19625	0.3965983	0.3201033	1.2190715	0.6642630
ZNFX1	0.582837	5.30339	1.64028	0.141972	0.398981	-5.06782	4.955883	5.068064	5.700353	5.489268
SH3TC2	0.582515	1.76953	1.56107	0.159512	0.418802	-5.17047	1.670780	1.285761	1.899356	2.222215
KLHDC8B	0.581795	3.01229	1.46031	0.184674	0.445091	-5.29737	2.371976	3.070808	3.422837	3.183537
ARHGDIB	0.581597	1.9289	1.52421	0.168332	0.427943	-5.21739	1.350269	1.925932	2.155068	2.284325
MSANTD1	0.581011	0.327373	1.65127	0.139685	0.396536	-5.0534	0.00000000	0.07373439	0.67867528	0.55708105
ARL6IP4	0.58101	1.71427	1.48123	0.179172	0.438951	-5.27138	1.170412	1.677111	2.236948	1.772594
TUBB4B	0.580295	8.61944	1.33471	0.220954	0.481279	-5.44896	7.836253	8.822329	8.994923	8.824249
FAM117A	0.579307	1.6589	1.58492	0.154032	0.41333	-5.13982	1.471147	1.267355	2.126076	1.771039
SLC2A11	0.5789	2.20448	1.63406	0.143281	0.400357	-5.07596	1.809518	2.020538	2.512084	2.475773
INPP5K	0.578797	4.86854	1.39174	0.20377	0.46259	-5.3811	4.158860	4.999419	5.273222	5.042652
PLA2G4C	0.578672	0.616022	1.65289	0.13935	0.396183	-5.05126	0.3457650	0.3076063	0.9118898	0.8988254
FAM102A	0.578215	3.78544	1.49359	0.175992	0.435293	-5.25594	3.661905	3.330754	4.349642	3.799446
VRK3	0.578143	2.33979	1.56849	0.157788	0.416793	-5.16095	1.896561	2.204871	2.792116	2.465603
ACAA1	0.577946	3.60021	1.49393	0.175906	0.435293	-5.25552	3.006658	3.615820	3.986882	3.791487
CES2	0.5779	5.5891	1.42909	0.193161	0.453041	-5.33576	4.953403	5.646892	6.063034	5.693060
SHROOM3	0.57651	2.10769	1.57507	0.156274	0.415638	-5.1525	2.021602	1.617263	2.445214	2.346672
RAB2B	0.576135	3.12047	1.50196	0.173869	0.432927	-5.24545	3.015118	2.649690	3.652352	3.164726
TRIM41	0.576106	5.19481	1.52424	0.168326	0.427943	-5.21736	4.723165	5.090357	5.690250	5.275484
RBM15	0.574433	3.55504	1.44165	0.189705	0.450004	-5.32037	3.535682	2.999968	3.587690	4.096826
ICAM1	0.574047	4.66525	1.50734	0.172513	0.431351	-5.23867	4.385821	4.370640	5.243561	4.660994
SCAND1	0.573842	7.12131	1.29306	0.234284	0.493844	-5.49744	6.340171	7.328605	7.597708	7.218752
BCL9L	0.572682	5.39718	0.921082	0.385595	0.621787	-5.88269	5.932486	4.289189	6.247667	5.119374
IRS2	0.572242	5.37064	0.913322	0.389407	0.624875	-5.88969	6.060122	4.108917	5.909955	5.403568
LRFN3	0.57102	2.59189	1.26243	0.244523	0.501484	-5.53249	2.691618	1.921139	3.278023	2.476774
TMEM57	0.570913	2.83185	1.37547	0.208548	0.467868	-5.40062	2.642408	2.450374	2.695213	3.539396
DRICH1	0.570359	0.419621	1.61938	0.146418	0.40366	-5.09513	0.08780506	0.18107876	0.64311082	0.76649068
CIC	0.569455	4.31496	0.916907	0.387643	0.623752	-5.88646	4.850705	3.209771	5.162702	4.036682
TBC1D10B	0.569304	2.62981	1.50915	0.172061	0.430693	-5.2364	2.363242	2.327073	3.187076	2.641847
IGF2	0.568489	0.352765	1.60856	0.148771	0.406726	-5.10921	0.09819558	0.03884527	0.72814151	0.54587797
MFSD5	0.567767	5.16645	1.3226	0.22476	0.484336	-5.46315	4.421223	5.343901	5.590635	5.310022
HPS6	0.567678	4.70828	1.42124	0.195349	0.454122	-5.34535	4.103150	4.745738	5.182471	4.801772
SH3D21	0.567386	1.44974	1.54543	0.163202	0.422807	-5.19045	1.251028	1.081076	1.931317	1.535558
KLF14	0.566999	1.47147	1.31487	0.227221	0.486307	-5.47218	1.370400	1.005532	2.208309	1.301621
IPO13	0.566458	4.49884	1.51037	0.171757	0.430484	-5.23487	4.003058	4.428165	4.934623	4.629516
CHRNA10	0.566435	0.680388	1.57965	0.155229	0.41455	-5.14661	0.3167470	0.4775947	1.0922862	0.8349252
SLC4A11	0.566369	1.49349	1.48099	0.179236	0.438951	-5.27169	1.343892	1.076716	2.044319	1.509028
NR4A1	0.56625	4.86938	1.15836	0.282168	0.537467	-5.64743	5.083080	4.089424	5.589935	4.715069
SLC7A4	0.56536	0.393998	1.52914	0.167128	0.426932	-5.21116	0.16904370	0.05359281	0.90076643	0.45259078
PNPLA3	0.565247	2.17227	1.42274	0.194929	0.453805	-5.34352	2.196622	1.582666	2.651980	2.257803
NFIC	0.56474	3.99985	0.919244	0.386495	0.62269	-5.88435	4.549019	2.885945	4.799450	3.764995
RHBDD2	0.564697	3.7328	1.51608	0.170336	0.429489	-5.22767	3.294285	3.606613	4.207044	3.823248
PHF12	0.56403	3.07427	1.32886	0.222787	0.482536	-5.45583	3.191074	2.393445	3.597021	3.115558
TRPV6	0.564005	0.334088	1.60756	0.14899	0.407033	-5.11051	0.02015556	0.08401564	0.65297574	0.57920626
NPPA	0.563954	0.803483	1.57994	0.155161	0.41455	-5.14623	0.6566437	0.3863676	1.0665565	1.1043632
ZNF653	0.56355	2.97409	1.39996	0.201392	0.459976	-5.37118	2.416303	2.968331	3.525491	2.986241
ARHGAP1	0.563142	5.62362	1.26287	0.244373	0.501484	-5.53199	5.686713	4.997376	6.315681	5.494693
VPS18	0.562572	5.24114	1.43808	0.190682	0.450959	-5.32475	4.659754	5.259951	5.680334	5.364515
VSIG2	0.562398	0.628939	1.5592	0.159949	0.419158	-5.17286	0.4869050	0.2085742	1.0069594	0.8133156
SLC25A18	0.561976	1.18616	1.56762	0.15799	0.416816	-5.16208	0.9826023	0.8277442	1.5966862	1.3376122
IFI35	0.561726	5.10227	1.23283	0.254773	0.511808	-5.56583	4.263664	5.379155	5.478880	5.287392
CASC10	0.561634	2.19042	1.54813	0.162559	0.422078	-5.18701	1.953796	1.865416	2.651420	2.291059
ELMO1	0.561436	1.52517	1.45719	0.185506	0.446093	-5.30122	1.5271843	0.9617241	1.9393123	1.6724678
RPS29	0.561346	0.910212	1.51775	0.169922	0.429351	-5.22556	0.405516	0.853562	1.129924	1.251845
TBX19	0.560665	0.942536	1.56305	0.159051	0.418416	-5.16794	0.7137193	0.6106872	1.0790415	1.3666953
LAT	0.56066	0.417682	1.58422	0.15419	0.413579	-5.14072	0.20810975	0.06659438	0.62400940	0.77201499
HOXB6	0.559849	3.60318	1.49889	0.174644	0.434329	-5.2493	3.218251	3.428267	4.113534	3.652682
GMIP	0.559843	3.5689	1.51404	0.170843	0.429489	-5.23024	3.257553	3.320413	4.078344	3.619309
SPINK4	0.558842	0.845913	1.34834	0.216737	0.477607	-5.4329	0.8275076	0.3054771	0.7827210	1.4679469
NXPE3	0.557301	2.37008	1.3019	0.231399	0.491118	-5.48723	2.298744	1.884118	2.217883	3.079581
DCUN1D3	0.55725	3.07007	1.52808	0.167386	0.427187	-5.21249	2.973377	2.609504	3.268125	3.429255
NCKAP5L	0.55714	4.3813	1.33604	0.220539	0.480943	-5.4474	4.326387	3.879078	5.038603	4.281142
TRMO	0.557031	3.50897	1.5247	0.168211	0.427928	-5.21677	3.053306	3.407600	3.687310	3.887658
NCOA6	0.557031	3.63635	0.880699	0.405739	0.638088	-5.9186	4.343413	2.372259	4.184420	3.645314
NRIP2	0.556722	1.06513	1.48606	0.177925	0.437833	-5.26536	1.0461444	0.5273888	1.3452035	1.3417728
BORCS6	0.556212	4.00576	1.31215	0.228091	0.48732	-5.47534	3.322928	4.132388	4.510653	4.057088
IGFALS	0.555547	0.781012	1.56112	0.1595	0.418802	-5.1704	0.6073391	0.3991385	1.1286588	0.9889128
GREB1	0.554811	1.06053	1.5141	0.170827	0.429489	-5.23016	0.9657552	0.6005025	1.4431490	1.2327314
AP3B2	0.554622	1.1407	1.53268	0.166267	0.425607	-5.20666	0.8030058	0.9237643	1.5861460	1.2498689
POLR2J2	0.554522	0.408831	1.5521	0.16162	0.421306	-5.18195	0.1415892	0.1215506	0.8253643	0.5468188
RHBDF2	0.554373	3.19059	1.39072	0.204067	0.462689	-5.38233	3.106113	2.720698	3.783885	3.151672
OLFM2	0.554255	0.626521	1.58243	0.154595	0.414143	-5.14302	0.3602569	0.3385303	0.8771253	0.9301722
IKBKG	0.554093	0.53471	1.58113	0.154891	0.414297	-5.1447	0.2219317	0.2933954	0.8177876	0.8057263
ABTB1	0.553857	3.59183	1.47184	0.181623	0.442495	-5.28307	3.152680	3.477121	4.082506	3.655009
C1orf50	0.553418	3.6957	1.4922	0.176348	0.435674	-5.25768	3.181363	3.656614	3.955639	3.989174
PCDHB9	0.551808	1.43946	1.51244	0.171239	0.429898	-5.23225	1.3603604	0.9667456	1.6788712	1.7518508
POU4F3	0.551661	0.552536	1.53858	0.164841	0.424156	-5.19916	0.3540507	0.1993598	0.6981442	0.9585889
JPH4	0.551442	0.531847	1.55716	0.160427	0.419875	-5.17547	0.3242065	0.1880449	0.8879407	0.7271950
CYP2E1	0.551128	2.16486	1.34548	0.217616	0.478592	-5.43628	2.250336	1.528255	2.640726	2.240120
TSPAN12	0.551037	1.62269	1.40179	0.200865	0.459751	-5.36896	1.258490	1.435862	1.562463	2.233962
ATF5	0.550758	2.94074	1.4861	0.177912	0.437833	-5.2653	2.458589	2.872141	3.331194	3.101053
DPYSL2	0.550541	2.20059	1.46183	0.184269	0.444702	-5.29549	2.193287	1.657349	2.443143	2.508575
TLCD2	0.549818	2.27642	1.30691	0.229777	0.489382	-5.48143	2.408235	1.594781	2.750485	2.352167
LRP4	0.549147	1.46848	1.47158	0.181692	0.442495	-5.2834	1.271733	1.116085	1.982043	1.504070
MIDN	0.549126	4.75167	1.26037	0.245224	0.502178	-5.53482	4.770595	4.183617	5.435163	4.617303
TRIM43B	0.548931	0.342105	1.55655	0.16057	0.419898	-5.17625	0.1352792	0.0000000	0.5655598	0.6675818
DNASE1L1	0.548566	4.64346	1.25757	0.246183	0.503515	-5.538	3.869918	4.868442	4.994058	4.841435
KDM2A	0.548534	4.74381	1.4297	0.192993	0.453038	-5.33502	4.650282	4.288802	5.263837	4.772314
HDAC7	0.548477	4.30923	1.43259	0.192194	0.452465	-5.33149	4.201663	3.868310	4.834340	4.332587
KCNQ4	0.547815	0.47412	1.5333	0.166117	0.425395	-5.20588	0.2266887	0.1737367	0.8851859	0.6108686
APC2	0.547756	1.77347	1.463	0.183956	0.444283	-5.29403	1.608315	1.390860	2.281485	1.813201
SEBOX	0.547606	0.566416	1.39664	0.202348	0.461247	-5.37518	0.5852254	0.0000000	0.6613399	1.0190969
NOL9	0.547517	3.05879	1.26074	0.245099	0.502178	-5.53441	3.227892	2.342171	3.561987	3.103110
CCDC51	0.547489	5.59997	1.34369	0.218166	0.479022	-5.43838	4.950113	5.702337	6.023246	5.724181
CELA2A	0.547461	0.273731	1.5442	0.163495	0.422958	-5.19201	0.0000000	0.0000000	0.6576767	0.4372461
TNFAIP1	0.547307	5.73708	1.40354	0.200364	0.459428	-5.36685	5.665400	5.261450	6.276313	5.745151
CLPS	0.546193	0.592006	1.41546	0.196976	0.455682	-5.35239	0.4580295	0.1797909	1.1481153	0.5820902
SNRNP25	0.546075	0.716828	1.46845	0.182515	0.44303	-5.28728	0.5758089	0.3117718	1.1950575	0.7846726
ACYP2	0.545482	1.82892	1.47546	0.180674	0.440854	-5.27857	1.670162	1.442198	2.302884	1.900439
BCAR1	0.545289	4.39861	1.39302	0.203397	0.462113	-5.37955	4.236415	4.015519	4.993008	4.349503
YPEL2	0.545126	1.23806	1.26712	0.242933	0.500814	-5.52716	1.3761116	0.5548763	1.2519292	1.7693116
PTGS1	0.54501	0.713508	1.52681	0.167697	0.42764	-5.21411	0.4131302	0.4688749	1.1197419	0.8522839
ZC3H10	0.544565	3.64962	1.37635	0.208288	0.467646	-5.39958	3.031460	3.723211	4.014491	3.829310
CAMLG	0.543795	4.7855	1.37791	0.207826	0.467316	-5.39771	4.407088	4.620115	4.719959	5.394833
TNFAIP8L2	0.543355	0.395206	1.54351	0.163661	0.423175	-5.1929	0.1435994	0.1034581	0.5954809	0.7382858
ACTL9	0.542957	0.29188	1.50838	0.172253	0.431087	-5.23737	0.0408036	0.0000000	0.7256158	0.4011008
NKX3.1	0.542577	1.13483	1.52525	0.168076	0.427925	-5.21607	0.8993204	0.8277644	1.5247663	1.2874723
MUC6	0.542318	0.297234	1.54946	0.162244	0.422078	-5.18531	0.03648658	0.01566432	0.56090908	0.57587801
AMH	0.542255	2.7381	1.07973	0.313663	0.565752	-5.72975	3.102667	1.831287	3.298966	2.719498
SYP	0.54173	0.84963	1.48445	0.178339	0.438174	-5.26736	0.4375388	0.7199911	1.2632135	0.9777758
REEP6	0.541337	3.37708	1.42	0.195696	0.454349	-5.34686	2.903520	3.309297	3.859533	3.435957
DCAF4L1	0.541061	0.835962	1.20704	0.264	0.521314	-5.59448	0.8005111	0.3303519	0.6167101	1.5962753
PDGFRL	0.541023	0.378992	1.52314	0.168594	0.428165	-5.21875	0.09029791	0.12666290	0.76619726	0.53280874
FTCD	0.540657	0.438854	1.49875	0.174679	0.434329	-5.24947	0.27868807	0.05836311	0.83848579	0.57987959
PAX8	0.540158	0.788754	1.42503	0.19429	0.453618	-5.34073	0.7555562	0.2817947	1.2127682	0.9048984
PAEP	0.540087	0.913849	1.4683	0.182554	0.44303	-5.28746	0.7885212	0.4990909	1.0185138	1.3492719
MEX3B	0.53992	1.41114	1.51594	0.17037	0.429489	-5.22784	1.269184	1.013181	1.669621	1.692585
PYY	0.5395	0.397869	1.48162	0.179072	0.438951	-5.2709	0.2562372	0.0000000	0.8148754	0.5203615
FAM180A	0.539295	0.960129	1.44093	0.189901	0.450169	-5.32125	0.8095030	0.5714596	1.0015400	1.4580122
CATSPER3	0.538982	0.921653	1.49167	0.176484	0.435874	-5.25835	0.6496893	0.6546353	1.0166325	1.3656558
VASN	0.538921	0.999434	1.4771	0.180247	0.440064	-5.27653	0.7052093	0.7547384	1.4675552	1.0702335
CARNS1	0.538665	0.788032	1.51542	0.170499	0.429489	-5.2285	0.6014899	0.4359091	1.1455262	0.9692035
DYRK1B	0.538227	3.68407	1.3978	0.202015	0.461017	-5.37379	3.421314	3.408592	4.264665	3.641696
PLEKHG6	0.538199	0.671551	1.45305	0.186616	0.446994	-5.30633	0.4621139	0.3427891	1.1683455	0.7129562
SMARCAL1	0.53798	2.70874	1.5294	0.167063	0.426896	-5.21082	2.387159	2.492349	3.022739	2.932730
AES	0.537935	0.688975	1.49629	0.175305	0.435148	-5.25256	0.3967012	0.4433140	1.1160407	0.7998449
CASP2	0.536261	3.66201	1.11158	0.300578	0.553877	-5.69689	3.991794	2.795958	4.169449	3.690825
CNPPD1	0.536143	5.83814	1.37697	0.208104	0.467646	-5.39883	5.276667	5.863469	6.259618	5.952804
GOLGA2	0.535974	5.23759	1.49539	0.175533	0.435226	-5.25368	4.878256	5.060958	5.624885	5.386278
MYEOV2	0.535725	0.658889	1.45352	0.186489	0.44689	-5.30575	0.1689520	0.6131013	0.9587214	0.8947819
ZNF747	0.535098	1.25214	1.44534	0.188699	0.448995	-5.31583	0.9619377	1.0072413	1.7529597	1.2864156
SCARF1	0.534992	0.545419	1.42626	0.193948	0.453305	-5.33923	0.3853202	0.1705260	1.0518181	0.5740116
FOXA1	0.534839	1.36161	1.31158	0.228273	0.48732	-5.476	1.4672403	0.7211452	1.7892445	1.4688183
ABHD8	0.534694	5.05164	1.36235	0.212474	0.472786	-5.41628	4.544813	5.023776	5.566833	5.071144
SERPIND1	0.534231	1.37421	1.41296	0.19768	0.456568	-5.35542	0.9166009	1.2975952	1.8432976	1.4393602
DTNBP1	0.533991	2.48892	1.41747	0.196409	0.455115	-5.34995	1.962298	2.481544	2.831978	2.679844
NKPD1	0.533867	0.358225	1.50541	0.172999	0.431922	-5.24111	0.15585292	0.02673107	0.71604161	0.53427634
ZNF816.ZNF321P	0.533044	1.10663	1.43429	0.191723	0.451938	-5.3294	1.0733313	0.6068848	1.3060780	1.4402258
TLE4	0.532889	3.12825	1.19481	0.26847	0.524746	-5.60792	3.397858	2.325747	3.379849	3.409534
SYCE2	0.531635	0.979402	1.46363	0.183791	0.444274	-5.29326	0.8741688	0.5530005	1.1459354	1.3445037
CNNM3	0.531559	1.51124	1.22008	0.259299	0.516376	-5.58004	1.5719167	0.9190103	2.1601015	1.3939442
FAM46A	0.5313	2.23696	0.864728	0.413912	0.644766	-5.93244	2.154794	1.787825	1.540533	3.464687
GJA3	0.531244	1.85012	1.4515	0.187035	0.447406	-5.30825	1.673511	1.495484	1.927838	2.303645
TBC1D10A	0.531196	3.23224	1.33395	0.22119	0.481279	-5.44985	2.728020	3.205255	3.778701	3.216965
PPP1R14C	0.53082	1.26366	1.50219	0.173811	0.432888	-5.24516	0.9199661	1.0765411	1.5831478	1.4749996
SLC23A3	0.530322	0.784019	1.44531	0.188709	0.448995	-5.31587	0.6716708	0.3660459	1.1989852	0.8993759
SLC27A3	0.529869	2.80753	1.40121	0.201031	0.459968	-5.36966	2.433029	2.652168	3.327885	2.817049
IFITM10	0.529824	1.98452	1.43687	0.191014	0.451349	-5.32624	1.805377	1.633843	2.457853	2.041016
CYP4F11	0.529506	0.450665	1.51102	0.171594	0.430365	-5.23405	0.1645621	0.2072626	0.6866830	0.7441537
SLC25A1	0.528987	5.88225	1.35167	0.215715	0.47667	-5.42895	5.366669	5.868838	6.375708	5.917774
NOL4L	0.528981	2.24729	1.11887	0.29765	0.551242	-5.68928	2.509831	1.455764	2.831705	2.191851
LOC391322	0.528656	2.98727	0.994187	0.351031	0.594478	-5.8145	3.408358	2.037525	3.616427	2.886769
USF1	0.528593	4.53576	1.43351	0.191938	0.452135	-5.33035	4.083893	4.459029	4.925071	4.675038
PHLDA3	0.528303	7.09887	1.23391	0.254395	0.511507	-5.56463	6.398949	7.270481	7.560498	7.165539
CBFA2T2	0.528206	2.49489	1.31803	0.226212	0.485428	-5.46849	2.494581	1.966987	3.030789	2.487190
GALNT9	0.528083	0.420768	1.48904	0.177158	0.436946	-5.26164	0.1894797	0.1239730	0.7915505	0.5780673
MISP	0.527881	2.45095	1.44304	0.189326	0.449449	-5.31866	2.090001	2.284023	2.897398	2.532387
ELMO2	0.527729	4.01801	1.47004	0.182095	0.4428	-5.2853	3.633876	3.874405	4.380139	4.183601
PGAM2	0.527296	3.91884	1.15244	0.284443	0.539788	-5.65376	4.214675	3.095699	4.299844	4.065123
OVOL3	0.527275	0.526311	1.44731	0.188165	0.448995	-5.31341	0.3364181	0.1889283	0.9720645	0.6078327
HIST1H4E	0.526832	1.78088	1.33289	0.221522	0.481405	-5.4511	1.205916	1.829007	1.871259	2.217327
C7orf43	0.526237	4.53465	1.33209	0.221774	0.481405	-5.45204	4.402018	4.141050	5.128464	4.467078
TMEM179	0.526141	0.585144	1.47029	0.182032	0.44273	-5.285	0.3062075	0.3379406	0.9924255	0.7040040
PARP10	0.525395	3.38717	1.22191	0.258646	0.515638	-5.57801	3.476862	2.772080	3.982424	3.317307
MUM1	0.523684	2.14132	1.45273	0.186702	0.447088	-5.30673	1.803611	1.955338	2.552844	2.253473
CDRT1	0.523153	0.668975	1.47304	0.181308	0.441979	-5.28158	0.4874701	0.3273263	0.8445149	1.0165873
NAP1L2	0.523006	0.734622	1.25196	0.24811	0.505595	-5.54435	0.4517418	0.4944958	0.5541587	1.4380913
SH3BP5L	0.522728	5.91898	1.38583	0.205496	0.464426	-5.38821	5.443632	5.871593	6.349893	6.010788
GLTSCR1	0.522682	2.48906	0.865078	0.413731	0.644766	-5.93214	2.954862	1.500581	3.369857	2.130950
PNKD	0.522007	3.09031	1.37382	0.209039	0.468363	-5.4026	2.640953	3.017663	3.567991	3.134638
RPS16	0.521439	1.57048	1.39473	0.202903	0.46177	-5.3775	1.075168	1.544357	1.931646	1.730758
ZNF329	0.521087	3.218	1.42255	0.194984	0.45385	-5.34376	3.132652	2.782267	3.594256	3.362838
GAMT	0.520949	4.63654	1.12282	0.296068	0.550227	-5.68514	3.818192	4.933933	5.091496	4.702528
C4orf47	0.520668	0.464558	1.40798	0.199095	0.458059	-5.36147	0.1710632	0.2373847	0.4954426	0.9543412
C5AR1	0.520561	0.895945	1.47189	0.18161	0.442495	-5.28301	0.5940858	0.6772419	1.2464018	1.0660486
GATAD2B	0.520385	4.04707	0.940732	0.376064	0.615662	-5.86476	4.568290	3.005473	4.589597	4.024935
TMEM44	0.519583	1.26288	1.41235	0.197853	0.456801	-5.35616	1.160669	0.845506	1.676318	1.369022
KAZALD1	0.518948	3.59964	1.3536	0.215129	0.476028	-5.42667	3.128637	3.551705	4.077042	3.641195
CST1	0.518781	0.25939	1.46911	0.182342	0.442978	-5.28646	0.0000000	0.0000000	0.6105352	0.4270260
HIST1H4H	0.518445	2.28221	1.31919	0.225844	0.485081	-5.46714	2.208689	1.837276	2.248444	2.834412
TMEM189	0.518133	4.4937	1.32636	0.223572	0.483171	-5.45875	4.348734	4.120530	5.069538	4.435991
P2RX2	0.517868	0.492859	1.44324	0.189272	0.449449	-5.31842	0.3452989	0.1225517	0.8579545	0.6456316
ZNF488	0.517861	0.668567	1.44393	0.189083	0.449267	-5.31756	0.3851269	0.4341468	1.0778116	0.7771844
SLC9A5	0.517724	2.51434	1.44002	0.190151	0.450226	-5.32237	2.361035	2.149913	2.893318	2.653078
GRINA	0.517424	6.61528	1.2419	0.251594	0.50848	-5.55567	6.570533	6.142600	7.256762	6.491218
FAM219A	0.51686	5.18264	1.41188	0.197988	0.457013	-5.35674	4.898166	4.950253	5.647902	5.234236
MARVELD1	0.516655	4.3141	1.22555	0.25735	0.514418	-5.57396	4.323787	3.787758	4.941226	4.203630
PDE6G	0.516384	0.578222	1.39101	0.203983	0.462689	-5.38198	0.3109202	0.3291398	1.0765365	0.5962916
HOXB13	0.516152	2.8816	1.36313	0.212237	0.472497	-5.41535	2.397337	2.849702	3.305539	2.973804
PDRG1	0.515447	5.8213	1.21335	0.261716	0.518925	-5.58751	5.108019	6.019125	6.182162	5.975876
OAZ2	0.515428	5.04474	1.33403	0.221167	0.481279	-5.44977	4.512520	5.061541	5.462225	5.142693
TCIRG1	0.515255	3.91749	1.35348	0.215164	0.476028	-5.42681	3.706381	3.613334	4.462041	3.888184
TNS2	0.515124	2.94492	1.22782	0.256545	0.513612	-5.57143	2.979500	2.395222	3.543206	2.861765
GMFG	0.514663	1.41444	1.39096	0.203996	0.462689	-5.38204	0.9464671	1.3677512	1.7715567	1.5719879
PNPLA7	0.51456	0.749017	1.42622	0.193959	0.453305	-5.33928	0.6388496	0.3446249	0.9205949	1.0920001
LYG1	0.513134	0.872312	1.35843	0.21366	0.474151	-5.42094	0.6198918	0.6115976	0.8530813	1.4046757
SCD5	0.513017	1.45152	1.45718	0.185508	0.446093	-5.30124	1.250089	1.139932	1.758629	1.657426
TUBB2A	0.512947	3.91023	1.29233	0.234526	0.49398	-5.49829	3.308626	3.998886	4.280017	4.053390
ZNF878	0.512849	0.660893	1.28103	0.238261	0.497148	-5.51127	0.4325844	0.3763523	0.5412470	1.2933879
RGS9BP	0.51283	0.454636	1.39343	0.20328	0.462113	-5.37906	0.1554329	0.2410093	0.9279106	0.4941926
RPL18	0.512482	0.768302	1.44302	0.189331	0.449449	-5.31868	0.5464254	0.4776958	1.1368538	0.9122316
MGAT4B	0.511972	4.84424	1.23372	0.254462	0.511507	-5.56485	4.786816	4.389683	5.484532	4.715912
CNPY4	0.511591	3.78663	1.33922	0.219551	0.480411	-5.44366	3.268360	3.793308	4.181630	3.903220
IL18BP	0.510889	1.93655	1.33215	0.221755	0.481405	-5.45197	1.984613	1.377590	2.213739	2.170241
VPREB3	0.510856	0.538753	1.44173	0.189683	0.450004	-5.32027	0.1893587	0.3772926	0.8471263	0.7412361
ECSIT	0.510733	5.90364	1.13532	0.291117	0.545487	-5.67197	5.109833	6.186712	6.262166	6.055844
MARCH8	0.510636	1.65622	1.44616	0.188477	0.448995	-5.31482	1.387145	1.414666	1.821262	2.001821
NOS3	0.510309	0.29442	1.45443	0.186245	0.446707	-5.30463	0.07853066	0.00000000	0.57940560	0.51974348
ZNF547	0.51019	2.54136	1.42533	0.194206	0.453609	-5.34036	2.162188	2.410337	2.719574	2.873330
SLC39A5	0.509538	0.282239	1.44646	0.188397	0.448995	-5.31446	0.05494143	0.00000000	0.46366033	0.61035620
RPS27L	0.509266	3.07581	1.40851	0.198946	0.457984	-5.36083	2.714105	2.928244	3.190303	3.470579
ITGAD	0.509221	0.491381	1.39549	0.202683	0.461587	-5.37658	0.1836528	0.2898891	0.9394033	0.5525801
ITLN1	0.508537	0.302524	1.44023	0.190092	0.450204	-5.32211	0.09651214	0.00000000	0.47931974	0.63426601
MYO1F	0.50841	0.444574	1.43346	0.191952	0.452135	-5.33041	0.08242145	0.29831628	0.66907256	0.72848615
C8orf44	0.507546	1.83387	1.35049	0.216076	0.477178	-5.43035	1.845847	1.314355	2.092400	2.082892
ZFYVE26	0.507337	2.57699	1.41452	0.197241	0.455783	-5.35353	2.475767	2.170877	2.828165	2.833154
NUDT18	0.506755	2.74072	1.24039	0.252121	0.509062	-5.55737	2.111833	2.862846	3.155871	2.832318
PRAMEF1	0.506281	0.277069	1.42145	0.195292	0.454122	-5.3451	0.0478570	0.0000000	0.6565944	0.4038239
PPL	0.506258	0.529451	1.42587	0.194055	0.453339	-5.3397	0.3812756	0.1713684	0.8328880	0.7322730
AS3MT	0.506198	0.939548	1.33201	0.221797	0.481405	-5.45213	0.9737245	0.3991737	1.2005301	1.1847636
DLK2	0.505793	2.40641	1.33738	0.220123	0.480943	-5.44583	2.361779	1.945254	2.843721	2.474898
SPDYE1	0.50535	0.778217	1.37908	0.207481	0.46684	-5.39631	0.6394676	0.4116170	0.8534853	1.2082986
TRIM64	0.505037	0.31155	1.36315	0.212233	0.472497	-5.41533	0.03808230	0.07997958	0.79911373	0.32902273
PRX	0.50477	1.18026	1.40997	0.19853	0.457604	-5.35906	0.8769207	0.9788268	1.5699776	1.2953096
PSMB3	0.504404	6.94671	1.13006	0.293193	0.54769	-5.67752	6.162449	7.226559	7.274140	7.123676
CEACAM1	0.502573	0.812133	1.4231	0.19483	0.4538	-5.34308	0.6491724	0.4725219	1.0896961	1.0371434
CHI3L2	0.501637	0.30375	1.42437	0.194474	0.453618	-5.34153	0.1058633	0.0000000	0.4987995	0.6103382
ZMYM3	0.501015	3.28666	1.30484	0.230446	0.489961	-5.48383	3.097240	2.975057	3.837472	3.236855
SMYD4	0.499864	3.03391	1.39636	0.202431	0.461283	-5.37553	2.795002	2.772953	3.429685	3.137997
FAM71E1	0.499679	0.567874	1.28761	0.236078	0.495373	-5.50371	0.3664962	0.2695735	1.1393846	0.4960424
C1orf54	0.499383	1.71288	1.2262	0.257118	0.514175	-5.57324	1.119440	1.806939	2.174873	1.750272
MARCKSL1	0.499064	6.64984	1.33313	0.221448	0.481405	-5.45082	6.379409	6.421203	7.156405	6.642333
EPHX4	0.498834	2.31995	1.35252	0.215455	0.47636	-5.42794	1.930018	2.211047	2.392508	2.746225
RPRML	0.498754	0.433827	1.41836	0.196158	0.455007	-5.34886	0.1543044	0.2145971	0.7429727	0.6234358
LEFTY1	0.498145	0.304879	1.42197	0.195144	0.453974	-5.34445	0.03598252	0.07562942	0.57841915	0.52948316
CTNNA1	0.497073	6.9321	1.29297	0.234315	0.493844	-5.49755	6.985095	6.382038	7.246782	7.114497
GOLGA3	0.497023	4.46947	1.02925	0.335315	0.581895	-5.78039	4.798995	3.642928	5.004946	4.431023
PILRB	0.496964	3.68989	1.29773	0.232755	0.492801	-5.49205	3.727576	3.155244	4.033697	3.843051
GJA5	0.496927	0.479153	1.35912	0.213451	0.474081	-5.42012	0.2797797	0.1815991	0.9271054	0.5281272
ZNF703	0.496818	1.77762	1.1769	0.275131	0.530894	-5.62744	1.834897	1.223520	2.366931	1.685122
EPDR1	0.496816	3.9265	1.41773	0.196334	0.455104	-5.34962	3.645501	3.710684	4.160054	4.189763
CAPG	0.496745	5.4833	0.947681	0.372736	0.613278	-5.85835	4.478318	5.991534	5.750225	5.713119
WHAMM	0.496702	2.91385	1.12611	0.29476	0.549013	-5.68168	3.176871	2.154125	3.260385	3.064016
EP300	0.496461	3.63398	0.759636	0.470605	0.688537	-6.01827	4.449223	2.322283	4.004449	3.759980
RDH10	0.496457	2.30158	1.24389	0.250904	0.508189	-5.55344	2.423980	1.682719	2.584079	2.515533
CYB561A3	0.496386	0.433012	1.391	0.203984	0.462689	-5.38198	0.2271340	0.1425047	0.8099859	0.5524249
CD79A	0.496339	0.409297	1.41294	0.197688	0.456568	-5.35545	0.1345889	0.1876659	0.7106389	0.6042937
DOLK	0.496083	4.63299	1.24982	0.248847	0.506422	-5.54676	4.043987	4.725901	5.006416	4.755638
CD4	0.495682	0.57277	1.40361	0.200344	0.459428	-5.36677	0.4144012	0.2354562	0.8423357	0.7988858
NDUFAF1	0.495676	4.97033	1.22601	0.257188	0.514175	-5.57345	4.604818	4.840176	4.843532	5.592813
OTUD7B	0.495305	4.31615	1.2945	0.233813	0.493411	-5.49578	4.313401	3.823594	4.390411	4.737194
FGFBP2	0.495141	0.437437	1.34317	0.218327	0.479044	-5.439	0.2756799	0.1040537	0.8927478	0.4772680
FAM214A	0.494619	2.08395	0.860986	0.415844	0.646032	-5.93565	2.096297	1.576979	1.486703	3.175811
PRAME	0.494521	5.97071	1.34698	0.217154	0.478195	-5.4345	5.660131	5.786764	6.423773	6.012165
PRRT2	0.494231	1.56014	1.22023	0.259248	0.516358	-5.57988	1.7084678	0.9175805	1.7999448	1.8145650
CABP7	0.493263	0.517908	1.40006	0.201364	0.459976	-5.37106	0.2379058	0.3046468	0.8363539	0.6927253
CCDC102A	0.492576	2.47063	1.33866	0.219724	0.480626	-5.44432	2.067378	2.381302	2.871893	2.561940
RNF225	0.491715	0.275216	1.40164	0.20091	0.459773	-5.36915	0.05871715	0.00000000	0.55897440	0.48317230
SYT5	0.491644	1.86432	1.36814	0.210733	0.470295	-5.40938	1.596709	1.640293	2.267071	1.953219
PTPN23	0.491567	4.96887	0.798431	0.449091	0.670855	-5.98767	5.542328	3.903842	5.756772	4.672531
SIPA1L2	0.490998	1.34569	1.17749	0.274909	0.530677	-5.6268	1.4216674	0.7787165	1.2911116	1.8912681
ING1	0.490826	3.15447	1.39577	0.202601	0.461494	-5.37624	2.923426	2.894687	3.334268	3.465497
PLEC	0.490634	7.02597	0.841183	0.426175	0.654602	-5.95247	7.520354	6.040957	7.792631	6.749947
EXOSC6	0.489902	5.06001	1.26587	0.243353	0.501014	-5.52857	4.943304	4.686815	5.598707	5.011216
TYSND1	0.489827	2.83821	1.19741	0.267513	0.523837	-5.60507	2.314295	2.872298	3.384713	2.781534
SCAF4	0.489628	3.80744	0.890361	0.400851	0.634147	-5.91012	4.366510	2.758743	4.227188	3.877321
CNOT4	0.489483	2.36857	1.01926	0.339735	0.585354	-5.7902	2.760716	1.486950	2.578710	2.647922
PTPRS	0.489304	3.44661	1.12151	0.29659	0.550587	-5.68651	3.577314	2.826603	4.029559	3.352966
UNG	0.489228	4.75554	1.28357	0.237416	0.496611	-5.50836	4.228540	4.793307	5.077987	4.922315
ITPKB	0.489176	3.07804	1.31539	0.227053	0.486307	-5.47156	2.690993	2.975906	3.520811	3.124440
UBQLN2	0.489157	4.05714	1.00014	0.348324	0.592195	-5.80877	4.475011	3.150117	4.285217	4.318225
CST4	0.489146	0.244573	1.39399	0.203118	0.462012	-5.37839	0.0000000	0.0000000	0.5393118	0.4389805
TRIM43	0.488682	0.36779	1.39296	0.203415	0.462113	-5.37963	0.17135973	0.07553912	0.61697714	0.60728549
TTYH3	0.487573	4.88449	1.01028	0.343747	0.588696	-5.79895	5.084297	4.197108	5.595876	4.660674
TMEM51	0.487275	1.7726	1.30494	0.230415	0.489961	-5.48372	1.281858	1.776075	2.068984	1.963500
TNRC6B	0.486213	1.4431	1.08252	0.312495	0.564364	-5.72689	1.524941	0.875052	1.247382	2.125036
UBE2D4	0.485474	2.87154	1.3158	0.226922	0.486299	-5.47109	2.819193	2.438419	3.237413	2.991146
EXTL3	0.485311	2.83271	1.32425	0.22424	0.483857	-5.46123	2.446059	2.734041	3.229731	2.920992
TRIM22	0.485158	0.904928	1.24797	0.249488	0.506832	-5.54885	0.5767514	0.7479473	0.8304609	1.4645543
CDC42BPG	0.483385	0.772835	1.31194	0.228158	0.48732	-5.47558	0.5894180	0.4728660	1.2304216	0.7986329
OR52D1	0.482941	0.268828	1.23356	0.254517	0.511507	-5.56502	0.05471363	0.00000000	0.17096535	0.84963115
GPR137	0.482222	5.08358	1.2469	0.249858	0.507008	-5.55005	4.834184	4.850763	5.643883	5.005508
GPX2	0.481889	0.450094	1.29933	0.232236	0.492241	-5.49021	0.2029700	0.2153286	0.4528884	0.9291892
SLC22A20	0.48136	0.337492	1.29242	0.234496	0.49398	-5.49819	0.1936248	0.0000000	0.8057227	0.3506225
MEN1	0.480741	5.27034	1.25131	0.248332	0.505881	-5.54507	5.019687	5.040251	5.818050	5.203370
TUBA1A	0.480399	5.44383	1.03378	0.333324	0.580411	-5.77591	4.621775	5.785491	5.798291	5.569774
RGS4	0.479537	0.681044	1.12777	0.294099	0.548732	-5.67993	0.4008797	0.4816712	0.4541236	1.3875016
DOK2	0.479205	0.432315	1.36081	0.212938	0.473398	-5.41811	0.1270271	0.2583974	0.7107173	0.6331181
NR6A1	0.478788	0.632515	1.35642	0.214269	0.474457	-5.42332	0.4809980	0.3052436	0.8893561	0.8544618
METTL7B	0.478455	3.69047	1.18369	0.27259	0.528355	-5.62006	3.061436	3.841056	3.974054	3.885348
CHMP7	0.478412	4.15974	1.27378	0.240687	0.49929	-5.51957	3.671396	4.169679	4.487840	4.310058
MT1E	0.478397	0.738197	1.32782	0.223112	0.482919	-5.45704	0.5707055	0.4272910	1.1273567	0.8274335
CHRNE	0.4776	0.475912	1.21467	0.26124	0.518304	-5.58604	0.2827179	0.1915049	1.0593939	0.3700295
NR0B1	0.477324	0.874643	1.33203	0.221792	0.481405	-5.45211	0.7436586	0.5283031	1.0094558	1.2171541
ZNF74	0.477286	3.26189	1.26753	0.242792	0.500814	-5.52669	2.821080	3.225415	3.678930	3.322137
PIN4	0.477107	2.89595	1.04251	0.329517	0.578193	-5.76726	2.239856	3.074935	2.743572	3.525433
KANSL3	0.476965	4.08955	1.31989	0.22562	0.485055	-5.46632	3.705969	3.996169	4.425549	4.230519
ZNF335	0.476811	4.71688	1.24228	0.251462	0.50848	-5.55524	4.617148	4.339792	5.227787	4.682775
NPIPB9	0.47674	0.980629	1.24043	0.252107	0.509062	-5.55732	1.0503368	0.4341826	1.2269936	1.2110051
BMP2K	0.476332	1.41427	1.16539	0.279483	0.535567	-5.63988	1.292986	1.059218	1.259883	2.044985
RAB27B	0.476189	0.616844	0.979354	0.357846	0.601161	-5.82866	0.2975499	0.4599490	0.2053099	1.5045667
PLAU	0.47586	0.52377	1.33766	0.220034	0.480943	-5.44549	0.3148154	0.2568637	0.8823097	0.6410901
BTN3A3	0.475831	2.36629	1.33486	0.220908	0.481279	-5.44879	2.006991	2.249754	2.553240	2.655166
TRAF4	0.475554	6.06013	1.22518	0.257482	0.514511	-5.57438	5.611799	6.032903	6.546369	6.049441
CD70	0.475549	7.15298	1.09756	0.306282	0.559163	-5.71144	6.430483	7.399935	7.493365	7.288152
TRADD	0.475544	3.3091	1.16597	0.27926	0.535438	-5.63925	2.791661	3.350985	3.841556	3.252178
TMEM204	0.475221	0.526978	1.3235	0.224477	0.483981	-5.46211	0.2810454	0.2976889	0.6088437	0.9203333
TINF2	0.474622	1.44537	1.33362	0.221294	0.481405	-5.45024	1.248886	1.167223	1.801502	1.563851
GDPD2	0.474622	0.580037	1.27482	0.240337	0.49929	-5.51838	0.5385885	0.1468628	0.9669681	0.6677269
CRIPT	0.474432	1.02207	1.01596	0.341206	0.586781	-5.79342	1.1429200	0.4267975	0.7782576	1.7403247
KCNAB2	0.474353	2.45661	1.28353	0.237431	0.496611	-5.50841	2.084434	2.354423	2.880575	2.506989
PDGFA	0.474346	2.92862	1.1211	0.296755	0.550587	-5.68694	2.993365	2.389529	3.514468	2.817118
ZNF226	0.474307	2.11369	1.25769	0.246141	0.503509	-5.53786	1.792728	1.960341	2.091398	2.610284
TMEM104	0.474305	3.59354	1.29081	0.235025	0.494323	-5.50004	3.354671	3.358101	4.048020	3.613363
ZNF837	0.474248	2.5418	1.18633	0.271605	0.527246	-5.61718	2.370688	2.238660	3.147858	2.409986
MEPCE	0.474109	6.11372	1.14478	0.287416	0.542099	-5.66194	5.498955	6.254370	6.555362	6.146181
MARK4	0.474062	3.30253	1.22735	0.256711	0.513865	-5.57196	3.094732	3.036265	3.855271	3.223851
ATG2A	0.473749	4.257	1.03033	0.334841	0.581388	-5.77932	4.457316	3.582925	4.872616	4.115123
MRPL44	0.473516	3.9845	1.32019	0.225525	0.485055	-5.46597	3.804250	3.691238	4.079583	4.362937
KLHDC7A	0.473424	0.248359	1.34881	0.216591	0.477607	-5.43234	0.02329414	0.00000000	0.53639083	0.43375173
TGFB1	0.473373	4.26677	1.08773	0.310335	0.562534	-5.72156	4.301813	3.758360	4.925265	4.081655
ST3GAL2	0.473304	3.47806	1.30573	0.23016	0.489812	-5.4828	3.130657	3.352152	3.860784	3.568633
TTC9B	0.473274	0.957009	1.12904	0.293596	0.548283	-5.6786	1.0499749	0.3907681	1.4963946	0.8908965
AURKC	0.472474	0.823026	1.32464	0.224116	0.483856	-5.46077	0.6182609	0.5553165	1.1893367	0.9291892
MYO1G	0.471762	0.360992	1.3421	0.218658	0.479615	-5.44026	0.07022758	0.17999575	0.63037937	0.56336720
UBTD1	0.471307	4.19847	1.17675	0.275188	0.530894	-5.6276	3.616148	4.309493	4.584356	4.283899
TRIM29	0.471038	0.567051	1.34333	0.218279	0.479022	-5.43882	0.3623216	0.3007415	0.7723093	0.8328302
FAM222B	0.470928	3.54324	0.839147	0.427247	0.655352	-5.95418	4.040180	2.575374	4.211772	3.345638
PLAA	0.470609	3.88672	1.09646	0.306734	0.559652	-5.71257	3.905634	3.397204	3.712567	4.531488
TRIM73	0.470484	0.418584	1.28668	0.236388	0.495603	-5.50479	0.27669216	0.08999123	0.83708549	0.47056582
PODNL1	0.470378	0.757828	1.28318	0.237545	0.496612	-5.5088	0.7317484	0.3135293	0.9600774	1.0259562
KAT7	0.470314	3.8352	0.895397	0.39832	0.632345	-5.90568	4.308281	2.891813	4.345135	3.795587
PPP1R3E	0.470185	2.06183	1.18751	0.271169	0.527018	-5.6159	2.141482	1.511989	2.470081	2.123761
ROPN1L	0.469891	1.02252	1.28575	0.236695	0.495691	-5.50586	0.7191205	0.8560246	1.4500034	1.0649241
KRT9	0.469789	0.673662	1.28334	0.237493	0.496612	-5.50862	0.2595857	0.6179495	1.0149375	0.8021758
IPP	0.469526	1.72699	1.12937	0.293466	0.54812	-5.67825	1.738395	1.246066	1.602740	2.320772
ZSWIM4	0.469438	3.6576	1.14735	0.286415	0.541446	-5.6592	3.662534	3.183227	4.226392	3.558246
CABLES2	0.469192	2.10369	1.19154	0.269677	0.525566	-5.6115	2.181486	1.556699	2.496422	2.180148
MMRN2	0.468981	0.500411	1.33182	0.221859	0.481405	-5.45236	0.2825575	0.2492836	0.8091752	0.6606283
MRPL10	0.468973	6.61563	1.24208	0.251533	0.50848	-5.55547	6.194218	6.568069	7.051757	6.648476
COX7A1	0.468833	0.523647	1.33052	0.222264	0.481738	-5.45388	0.2809120	0.2975485	0.8376554	0.6784711
TMEM86A	0.468757	1.76367	1.29995	0.232032	0.492216	-5.48949	1.409297	1.649281	2.116664	1.879428
TRAPPC6A	0.468543	4.03505	1.15704	0.282674	0.537949	-5.64884	3.443030	4.158525	4.437241	4.101400
SCO2	0.468448	1.5029	1.25293	0.247774	0.505394	-5.54324	1.018717	1.518625	1.789026	1.685213
PURA	0.467096	3.42919	1.29582	0.233381	0.493067	-5.49426	3.291725	3.099563	3.525339	3.800141
RIPK1	0.46662	2.77973	1.18332	0.272729	0.528504	-5.62047	2.765321	2.327526	2.736736	3.289351
APH1B	0.466335	1.10372	1.17907	0.274317	0.530254	-5.62508	1.2162917	0.5248091	1.2461781	1.4275927
NKG7	0.465614	0.768334	1.20055	0.266364	0.522949	-5.60162	0.6737027	0.3973520	1.2944861	0.7077960
GNA15	0.465434	0.477301	1.2779	0.239307	0.49814	-5.51486	0.2374438	0.2517247	0.9057079	0.5143279
PIP4K2B	0.464698	3.75067	1.26081	0.245074	0.502178	-5.53432	3.331848	3.704791	4.107782	3.858251
PFDN6	0.464669	5.53584	1.12698	0.294413	0.548732	-5.68076	4.881171	5.725834	5.789307	5.747036
ZNF317	0.464262	4.72754	1.3061	0.230038	0.489774	-5.48236	4.606799	4.384016	5.006764	4.912575
KCTD7	0.46388	3.18342	1.30807	0.229402	0.488828	-5.48008	3.007935	2.895026	3.511432	3.319288
PCDHB7	0.463874	1.94115	1.27444	0.240466	0.49929	-5.51882	1.774625	1.643807	2.355913	1.990267
FBXL20	0.463625	1.88513	1.15569	0.283194	0.538376	-5.65029	2.033000	1.273627	2.140458	2.093419
ZSCAN20	0.463575	2.49705	1.17953	0.274144	0.530113	-5.62458	2.526904	2.003625	2.500999	2.956680
SPIN2B	0.463347	2.43106	1.27422	0.240537	0.49929	-5.51906	2.058859	2.339920	2.532400	2.793072
ITGB3BP	0.462521	0.335392	1.27087	0.241665	0.499875	-5.52289	0.1009430	0.1073198	0.3728082	0.7604962
P4HA2	0.461383	3.81489	1.23356	0.254516	0.511507	-5.56502	3.368910	3.799490	4.184231	3.906935
D2HGDH	0.461273	1.89297	1.27461	0.240407	0.49929	-5.51861	1.755883	1.568782	2.276061	1.971149
PSMB2	0.460396	5.36251	1.27239	0.241153	0.499542	-5.52115	5.230413	5.034209	5.741748	5.443665
TRAF1	0.460084	3.62983	1.26765	0.242751	0.500814	-5.52655	3.265907	3.533676	3.989986	3.729765
OAS2	0.459983	0.860895	1.27632	0.239835	0.498507	-5.51666	0.7074392	0.5543677	0.9423055	1.2394670
KIAA1614	0.458573	0.379424	1.29912	0.232303	0.492266	-5.49045	0.21185475	0.08841901	0.67382185	0.54359865
ARRB1	0.458027	1.48274	1.23109	0.255387	0.512417	-5.56778	1.087446	1.420014	1.891697	1.531817
PDYN	0.457953	0.228976	1.30511	0.230359	0.489961	-5.48351	0.0000000	0.0000000	0.5079707	0.4079347
ABCC5	0.457865	2.59576	1.17848	0.274536	0.530513	-5.62572	2.691984	2.041674	2.862448	2.786940
PDCL	0.457515	3.04249	1.17588	0.275511	0.531198	-5.62854	2.863294	2.764178	2.945165	3.597337
CLTA	0.457177	7.90532	1.10415	0.303592	0.556592	-5.70462	7.264029	8.089425	8.251816	8.015992
C20orf173	0.457149	0.228575	1.2996	0.232146	0.492241	-5.48989	0.0000000	0.0000000	0.5264098	0.3878885
ETV6	0.456689	2.20692	1.06138	0.3214	0.571482	-5.74836	2.447911	1.509235	2.310901	2.559624
TRIM49	0.456465	0.280968	1.23367	0.25448	0.511507	-5.5649	0.1054714	0.0000000	0.2821577	0.7362437
UPK3B	0.455795	1.0263	1.22332	0.258145	0.515041	-5.57645	1.046460	0.550350	1.250538	1.257863
BVES	0.455079	0.977696	1.18728	0.271252	0.527018	-5.61614	0.9906351	0.5096780	1.0204512	1.3900189
FGF1	0.454569	0.835749	1.27304	0.240933	0.499476	-5.5204	0.5966770	0.6202523	0.9258399	1.2002282
ZNF101	0.454298	1.89448	1.10545	0.303061	0.555969	-5.70327	2.047976	1.286687	2.294071	1.949189
CISH	0.453949	0.746736	1.2398	0.25233	0.509241	-5.55804	0.6092236	0.4302992	1.1625049	0.7849168
LHFPL5	0.453865	0.321687	1.29501	0.233646	0.493298	-5.4952	0.13183820	0.05767156	0.55305299	0.54418665
GRK7	0.453621	0.295257	1.2955	0.233484	0.493095	-5.49463	0.06632499	0.07056812	0.54536733	0.49876821
ATP6V0D1	0.453564	3.79634	1.22616	0.257135	0.514175	-5.57329	3.384737	3.754373	4.164169	3.882070
FOXRED2	0.453449	2.5409	1.01296	0.342546	0.587475	-5.79634	2.790561	1.837797	3.024831	2.510425
FAM186B	0.452941	0.955562	1.26199	0.244674	0.501633	-5.53299	0.8417123	0.6164699	1.0760694	1.2879953
EGFLAM	0.452928	0.975783	1.27695	0.239623	0.498367	-5.51594	0.6376391	0.8609988	1.1911978	1.2132958
HGFAC	0.452875	0.375752	1.26275	0.244416	0.501484	-5.53213	0.1319555	0.1666740	0.7534724	0.4509072
GPKOW	0.451491	5.20816	1.06767	0.318731	0.569587	-5.74201	4.533822	5.430997	5.537642	5.330160
HOXA9	0.451244	0.847134	1.25586	0.246766	0.504009	-5.53993	0.7309792	0.5120444	0.9587214	1.1867899
ARHGEF3	0.451186	1.32663	1.13579	0.290932	0.5453	-5.67147	1.3803967	0.8216758	1.3179473	1.7864964
CNIH2	0.451105	1.45333	1.2552	0.246994	0.504204	-5.54068	1.182321	1.273242	1.830985	1.526789
SALL1	0.450774	3.60936	0.86884	0.411796	0.643891	-5.92889	4.116566	2.651370	3.957728	3.711756
RAB43	0.450634	0.897593	1.23725	0.253223	0.510311	-5.5609	0.5075848	0.8369680	1.2289086	1.0169118
RBM48	0.450193	2.48122	1.14068	0.289015	0.543906	-5.66629	2.405228	2.107022	2.385329	3.027308
TMEM240	0.44976	1.2275	1.10994	0.301242	0.55446	-5.6986	1.3038566	0.7013873	1.7097340	1.1950290
LY6G5B	0.449175	1.24156	1.0393	0.330914	0.579174	-5.77045	1.4182709	0.6156703	1.7505858	1.1817055
WDR6	0.449095	6.04653	1.24815	0.249423	0.506817	-5.54864	5.826533	5.817442	6.433296	6.108869
SLC12A8	0.448914	0.348354	1.27398	0.240617	0.49929	-5.51933	0.1440254	0.1037692	0.6503243	0.4952988
SPOCK2	0.448864	0.654303	1.26821	0.242561	0.500755	-5.52591	0.4724722	0.3872686	0.9722901	0.7851795
UNC5B	0.448681	0.975671	1.2665	0.243141	0.500899	-5.52786	0.7169244	0.7857371	1.3013705	1.0986540
HES7	0.448157	2.82782	1.0922	0.308485	0.561275	-5.71696	2.574452	2.633037	3.466388	2.637414
HS6ST1	0.448047	2.37746	1.20799	0.263653	0.520828	-5.59343	1.961355	2.345517	2.742657	2.460308
RAB42	0.447509	0.453649	1.19657	0.267822	0.524137	-5.60599	0.2817715	0.1780185	0.9279894	0.4268185
ME1	0.447311	2.26261	1.17087	0.277404	0.533478	-5.63396	2.266713	1.811202	2.295281	2.677256
TBKBP1	0.446832	2.92731	1.11293	0.300035	0.553462	-5.69549	2.923653	2.484128	3.462805	2.838641
SSTR5	0.446151	0.332096	1.19962	0.266704	0.523289	-5.60264	0.08479534	0.13324593	0.79818457	0.31215944
ZFHX2	0.446143	0.702815	1.12519	0.295125	0.549442	-5.68265	0.7907532	0.1687332	1.1102630	0.7415093
BGLAP	0.445693	0.513386	1.16876	0.278202	0.534324	-5.63624	0.5810794	0.0000000	0.7802929	0.6921728
CTC1	0.445279	2.45472	1.14661	0.286704	0.541528	-5.65999	2.512338	1.951818	2.844958	2.509757
DOK7	0.445097	0.809375	1.24841	0.249333	0.506794	-5.54834	0.5238788	0.6497734	1.1482864	0.9155600
KRI1	0.444989	5.18653	1.25242	0.247951	0.505514	-5.54383	4.874896	5.053183	5.488248	5.329809
LYN	0.444921	2.33715	1.15984	0.281601	0.537106	-5.64584	2.412187	1.817187	2.625731	2.493486
ZNF786	0.444788	2.69561	1.20218	0.265768	0.522585	-5.59983	2.705558	2.240870	2.901136	2.934869
PCDHB14	0.444576	1.12719	1.19257	0.269295	0.525395	-5.61037	1.1540690	0.6557264	1.3532503	1.3456966
FAM111B	0.443811	0.847548	0.721995	0.492127	0.704275	-6.04672	0.4536563	0.7976288	0.1045639	2.0343442
DAXX	0.443564	3.09177	1.20522	0.264661	0.52185	-5.59649	2.715821	3.024162	3.471958	3.155152
SYT11	0.443463	4.99347	1.23124	0.255334	0.512392	-5.56761	4.633185	4.910302	5.305368	5.125044
LMO2	0.443036	0.919775	1.21139	0.262424	0.519765	-5.58968	0.4937322	0.9027819	1.1668785	1.1157084
MTHFSD	0.442928	3.84547	1.2232	0.258187	0.515044	-5.57658	3.542595	3.705411	4.228010	3.905852
SLC43A2	0.442704	0.893101	1.19902	0.266925	0.523326	-5.60331	0.6503386	0.6931592	1.3418108	0.8870952
AGRP	0.442495	0.294707	1.24603	0.250158	0.507181	-5.55103	0.1469177	0.0000000	0.6072907	0.4246176
BCL6	0.441611	2.15677	1.06447	0.320087	0.570426	-5.74524	2.350500	1.521434	2.499699	2.255458
ADAMTS7	0.441132	1.92689	1.12306	0.295972	0.550227	-5.68488	1.920168	1.492489	2.419450	1.875472
TTC30A	0.441084	1.57681	1.06387	0.320341	0.570472	-5.74584	1.346304	1.366237	1.366270	2.228439
FXYD5	0.440605	4.77386	1.15025	0.285292	0.540116	-5.65611	4.771520	4.335601	5.203384	4.784947
OCLM	0.439953	0.789222	0.826642	0.433875	0.659769	-5.96461	0.8775569	0.2609347	0.2952534	1.7231444
TSNAXIP1	0.439385	0.758577	1.2546	0.247199	0.504463	-5.54135	0.5169965	0.5607736	0.9939406	0.9625988
MAPK8IP3	0.439295	4.25899	1.00576	0.345781	0.590279	-5.80334	4.420839	3.657837	4.812397	4.144869
FBXO6	0.437998	3.82383	1.02184	0.338589	0.584281	-5.78767	3.134719	4.074938	4.139976	3.945678
CCT3	0.437742	8.42384	1.01417	0.342007	0.58721	-5.79517	7.716178	8.693756	8.677408	8.608011
PCDHB11	0.437325	0.771899	1.12458	0.295368	0.549665	-5.68329	0.7040352	0.4024383	1.2828903	0.6982330
OLFML3	0.437247	0.330092	1.21663	0.260537	0.517389	-5.58387	0.1080635	0.1148724	0.7074547	0.3899756
C11orf42	0.436612	0.687417	1.06144	0.321374	0.571482	-5.7483	0.5528411	0.3853813	0.4948937	1.3165529
ARR3	0.436339	1.03337	1.16068	0.28128	0.536813	-5.64494	1.0175494	0.6128502	1.0782854	1.4247925
ANKK1	0.436119	0.819418	1.22853	0.256295	0.513469	-5.57065	0.7042885	0.4984292	1.0903595	0.9845955
APOBEC3D	0.436091	1.87019	1.20446	0.264938	0.521907	-5.59732	1.706320	1.597972	2.260066	1.916407
TCEB3	0.435484	5.30502	1.10038	0.30513	0.557762	-5.70853	5.442774	4.731782	5.568829	5.476694
MSRB1	0.435404	2.12627	1.04573	0.328123	0.576822	-5.76406	1.486224	2.330918	2.458285	2.229664
FAM109A	0.435355	2.76741	1.20156	0.265995	0.522585	-5.60051	2.526202	2.573254	3.165686	2.804479
KLF2	0.435159	1.03964	1.1779	0.274754	0.530618	-5.62635	0.6763070	0.9678114	1.4346970	1.0797394
CNN2	0.434861	5.01187	1.05611	0.323653	0.573057	-5.75367	4.960927	4.627955	5.615795	4.842810
PTCRA	0.434303	0.217151	1.18732	0.271238	0.527018	-5.6161	0.0000000	0.0000000	0.2278029	0.6408028
CCNE2	0.434231	1.00122	0.715011	0.49619	0.70708	-6.05186	0.7194003	0.8488144	0.2579130	2.1787644
EIF3F	0.43411	7.40707	1.13549	0.291049	0.54544	-5.67178	7.293772	7.086250	7.904079	7.344164
MXI1	0.433643	3.37299	1.02348	0.337864	0.584203	-5.78606	3.467065	2.845263	3.246381	3.933232
TNK2	0.433549	3.47104	1.06141	0.321388	0.571482	-5.74833	3.543167	2.965364	3.976725	3.398903
NADSYN1	0.433002	3.40723	1.22202	0.258607	0.515638	-5.57789	3.125296	3.256171	3.709451	3.538021
C3orf62	0.432701	2.32192	1.19004	0.270231	0.526177	-5.61314	2.291431	1.919705	2.584264	2.492274
DRD2	0.432673	1.26302	1.20502	0.264734	0.521907	-5.59671	1.066884	1.026480	1.633960	1.324749
NAGPA	0.432497	0.83458	1.21911	0.259649	0.516547	-5.58113	0.6383420	0.5983199	1.1621109	0.9395456
CCR7	0.432412	0.299079	1.22619	0.257122	0.514175	-5.57325	0.1657460	0.0000000	0.5318734	0.4986974
HOOK2	0.432153	3.11878	1.18479	0.272179	0.528038	-5.61886	2.824112	2.981294	3.518230	3.151481
C4orf3	0.432152	4.22325	1.13712	0.29041	0.544962	-5.67006	4.009943	4.004405	4.151874	4.726777
RAPSN	0.431932	0.43526	1.22207	0.258591	0.515638	-5.57784	0.2285102	0.2100771	0.7470228	0.5554287
RITA1	0.431873	5.22409	1.05004	0.32626	0.575401	-5.75975	4.608479	5.407837	5.566158	5.313903
NOS1AP	0.431442	0.505624	1.22431	0.257792	0.514643	-5.57534	0.3433105	0.2364955	0.7815816	0.6611082
DUSP3	0.43122	5.17452	1.22924	0.256042	0.513169	-5.56985	4.987177	4.930633	5.428428	5.351823
SLX4	0.431213	2.78069	1.08203	0.312701	0.564622	-5.7274	2.812136	2.318037	3.271471	2.721127
NCDN	0.430898	6.34627	1.15079	0.285084	0.540116	-5.65553	6.083319	6.178328	6.815649	6.307795
EPM2A	0.43076	1.625	1.16216	0.280715	0.536306	-5.64335	1.487347	1.331902	1.616558	2.064211
SPATA12	0.430347	0.336006	1.2196	0.259472	0.516479	-5.58058	0.1404831	0.1011826	0.6367486	0.4656109
SS18L1	0.430322	2.60967	1.00771	0.344902	0.589488	-5.80144	2.862417	1.926597	2.745290	2.904369
TOM1	0.430272	2.49778	1.11047	0.30103	0.554309	-5.69806	1.981760	2.583532	2.829321	2.596516
PCYT2	0.429938	2.88984	1.13984	0.289345	0.544161	-5.66718	2.478392	2.871345	3.294339	2.915275
CDR2L	0.429782	3.59154	1.12326	0.295893	0.550227	-5.68468	3.324419	3.428888	4.101912	3.510960
ENO3	0.429573	3.89964	1.15621	0.282992	0.538268	-5.64973	3.574493	3.795216	4.329858	3.898996
SUFU	0.429108	2.95788	1.16535	0.279495	0.535567	-5.63991	2.729132	2.757514	3.394173	2.950688
C22orf23	0.42902	5.20737	0.677056	0.518644	0.720577	-6.07904	5.815292	4.170423	6.032769	4.810987
SUSD6	0.428965	3.42387	1.14827	0.28606	0.541008	-5.65822	3.273396	3.145386	3.883744	3.392968
S1PR5	0.428691	1.32645	1.11572	0.298913	0.552418	-5.69258	0.9016419	1.3225692	1.7652508	1.3163415
MAGEE1	0.428264	0.703193	1.1531	0.284192	0.539426	-5.65306	0.6170619	0.3610594	1.1218756	0.7127739
IRX3	0.428109	2.81597	1.07687	0.314857	0.566547	-5.73266	2.437137	2.766704	3.356656	2.703402
UQCR11	0.428032	4.3132	0.816074	0.439532	0.663556	-5.97333	3.350375	4.848003	4.642926	4.411516
RENBP	0.428008	1.19486	1.20412	0.265059	0.521907	-5.59769	0.8744482	1.0872690	1.4662445	1.3514879
SCGB1A1	0.427964	0.213982	1.15835	0.282169	0.537467	-5.64743	0.0000000	0.0000000	0.1981685	0.6577604
GSTT1	0.427373	4.13666	1.03969	0.330743	0.579072	-5.77006	3.527306	4.318636	4.485892	4.214796
UBE2R2	0.426672	5.23591	0.891673	0.40019	0.633505	-5.90897	5.592311	4.452841	5.724925	5.173571
ZNF646	0.426509	4.45218	1.12168	0.296525	0.550587	-5.68634	4.080658	4.397188	4.906601	4.424263
RHPN2	0.42649	1.92907	1.19949	0.266752	0.523289	-5.60279	1.594529	1.837116	2.156210	2.128415
STAT3	0.426023	4.14482	1.16692	0.278898	0.535046	-5.63822	4.017845	3.845764	4.540336	4.175318
TMEM80	0.425556	3.09171	1.06642	0.319262	0.5699	-5.74327	3.107088	2.650785	3.598248	3.010737
CBLN1	0.425506	0.321391	1.20903	0.263277	0.520373	-5.59228	0.1169756	0.1003002	0.6062734	0.4620140
LCN15	0.425432	0.212716	1.20368	0.26522	0.521987	-5.59818	0.0000000	0.0000000	0.5216497	0.3292140
ZNF763	0.425036	0.892885	1.08981	0.309475	0.562218	-5.71943	0.7431395	0.6175941	0.7774223	1.4333825
C1orf216	0.425005	4.13119	1.18109	0.273561	0.529359	-5.62289	3.926300	3.911079	4.506085	4.181304
SERTAD1	0.424728	5.99583	0.900697	0.395669	0.630392	-5.90098	5.188441	6.378499	6.355482	6.060914
PCNA	0.424646	6.5248	0.965658	0.364229	0.607264	-5.84159	6.610793	6.014163	6.315528	7.158721
KCNK4	0.424439	0.257027	1.16076	0.281249	0.536813	-5.64485	0.0896164	0.0000000	0.6699583	0.2685351
PCDHA4	0.423973	0.770944	1.20941	0.26314	0.520373	-5.59186	0.5823044	0.5356115	0.9499783	1.0158832
NYNRIN	0.423824	0.474244	1.16423	0.279923	0.535984	-5.64112	0.3293338	0.1953301	0.8688038	0.5035072
MICB	0.423464	1.42409	1.18177	0.273304	0.529198	-5.62214	1.074256	1.350458	1.692990	1.578652
PIP5K1C	0.423237	3.24982	0.981683	0.35677	0.600299	-5.82645	3.370020	2.706383	3.819791	3.103087
MZF1	0.422851	4.52795	0.964916	0.364577	0.607597	-5.84229	4.686649	3.946402	5.092532	4.386222
MFAP4	0.422843	0.735077	1.19674	0.267759	0.524137	-5.6058	0.6071051	0.4402061	0.9911144	0.9018829
HHLA3	0.422706	3.8259	0.920478	0.385891	0.621951	-5.88324	3.972269	3.256830	4.489609	3.584902
SEC31B	0.422691	1.54645	1.16815	0.278434	0.534415	-5.6369	1.513498	1.156704	1.764612	1.750973
ASB6	0.422326	5.06657	1.09902	0.305686	0.558565	-5.70993	4.625678	5.085140	5.482762	5.072708
CSTB	0.422235	5.35967	1.1271	0.294367	0.548732	-5.68064	4.939436	5.357661	5.724166	5.417402
CCNK	0.42126	1.6413	1.02151	0.338735	0.584417	-5.78799	1.741474	1.119873	2.139067	1.564799
ADIG	0.421258	0.210629	1.19366	0.268892	0.525339	-5.60917	0.0000000	0.0000000	0.3326611	0.5098550
CPNE5	0.421065	0.513771	1.19874	0.267028	0.523368	-5.60361	0.3075892	0.2988883	0.7830380	0.6655704
PCDHB13	0.421021	1.10288	1.12288	0.296044	0.550227	-5.68507	1.1517307	0.6330145	1.2833059	1.3434823
NDUFS3	0.420829	5.80864	0.935618	0.378527	0.617405	-5.86946	5.064885	6.131560	6.145041	5.893062
SCAMP5	0.420695	3.63796	1.12739	0.294252	0.548732	-5.68034	3.288204	3.567015	4.057370	3.639239
HSP90AA1	0.420642	7.05121	0.406897	0.695414	0.833477	-6.2331	6.448728	7.233043	5.416218	9.106837
TMEM14A	0.420617	2.60972	0.972085	0.361223	0.604555	-5.83554	2.174601	2.624222	2.380649	3.259408
SAMD9	0.420411	1.71392	0.522684	0.616233	0.785534	-6.17578	1.0857463	1.9216886	0.5832403	3.2650169
SNAP29	0.420216	2.98552	1.16719	0.278796	0.535029	-5.63793	2.866228	2.684595	3.058995	3.332260
FAAP20	0.420159	1.87081	1.12862	0.293761	0.548432	-5.67904	1.681963	1.639501	2.326276	1.835507
PCYOX1	0.420137	2.87816	0.888437	0.401821	0.634598	-5.91182	3.049669	2.286506	2.603550	3.572899
ZNF442	0.419812	0.723647	1.00268	0.347172	0.591223	-5.80632	0.5076037	0.5198795	0.4877942	1.3793123
EMP2	0.41941	3.33959	1.12701	0.294403	0.548732	-5.68074	3.255276	3.004491	3.760420	3.338166
C19orf71	0.419049	4.49688	0.810225	0.442685	0.666113	-5.97811	4.908294	3.666419	5.106336	4.306476
C11orf71	0.418791	3.47445	1.18145	0.273423	0.529328	-5.62249	3.245395	3.284710	3.791593	3.576093
ALKBH6	0.418753	1.08596	1.05973	0.322107	0.572075	-5.75003	0.8244720	0.9287022	1.6474474	0.9432323
RNF38	0.418044	2.09427	0.780077	0.459184	0.67942	-6.00231	2.635518	1.134973	2.065252	2.541326
PPFIA3	0.417869	2.5835	1.13809	0.290028	0.544859	-5.66903	2.269485	2.479639	2.980611	2.604251
DHX38	0.417596	5.68586	1.16327	0.28029	0.53613	-5.64216	5.437669	5.516464	6.044856	5.744468
ZKSCAN5	0.417582	3.63794	1.10329	0.303942	0.556841	-5.70551	3.580084	3.278220	3.611308	4.082158
LOC728392	0.41699	1.93725	1.11878	0.297682	0.551242	-5.68937	1.740066	1.717451	2.394291	1.897207
CCDC64	0.416752	0.470549	1.19066	0.270002	0.525891	-5.61246	0.2628322	0.2615139	0.6648379	0.6930114
OPRL1	0.416656	0.793869	1.16272	0.280499	0.536306	-5.64275	0.5306696	0.6404131	1.1413941	0.8630012
CELSR3	0.415691	3.70037	1.01337	0.342364	0.587475	-5.79595	3.734231	3.250815	4.245665	3.570763
MOB3A	0.414977	3.68324	1.0478	0.327227	0.576174	-5.76199	3.684649	3.266863	4.183518	3.597948
TMEM179B	0.414949	2.4173	1.02647	0.336542	0.583176	-5.78313	2.218171	2.201482	3.017175	2.232377
INSR	0.414894	1.51714	1.10782	0.302099	0.555113	-5.7008	1.566129	1.053257	1.759054	1.690119
ANK1	0.414839	0.429357	1.18464	0.272235	0.528068	-5.61903	0.2182257	0.2256502	0.6615787	0.6119749
SEPW1	0.414793	0.398462	1.17593	0.275495	0.531198	-5.62849	0.2459192	0.1362117	0.5397180	0.6719985
MAGEA4	0.414337	9.08491	1.02505	0.337171	0.583612	-5.78453	8.498925	9.256561	9.394235	9.189925
RAB6B	0.414164	0.790411	1.15031	0.285267	0.540116	-5.65604	0.4615845	0.7050737	1.1077415	0.8872455
PPP2R1A	0.414014	6.88592	1.03541	0.33261	0.579958	-5.7743	6.332541	7.025282	7.237086	6.948766
TMEM127	0.413809	5.07651	1.10761	0.302184	0.555156	-5.70102	4.755145	4.984061	5.509884	5.056940
CPTP	0.413636	4.51073	1.00118	0.347854	0.591808	-5.80777	4.535729	4.072085	5.074853	4.360234
TAPBPL	0.413173	2.44725	1.13955	0.289457	0.544248	-5.66749	2.094463	2.386855	2.765553	2.542112
ZP1	0.413143	1.66472	1.14726	0.286451	0.541446	-5.65929	1.294198	1.622100	1.888070	1.854515
RALGDS	0.413055	4.84027	1.12287	0.296049	0.550227	-5.68509	4.555982	4.711499	5.252502	4.841088
KXD1	0.412942	6.00476	1.03065	0.3347	0.581384	-5.77901	5.497943	6.098629	6.441407	5.981049
GABBR2	0.412836	0.277295	1.17489	0.275885	0.531507	-5.62961	0.09880921	0.04294472	0.42879238	0.53863332
HIC1	0.412546	0.573752	1.05608	0.323664	0.573057	-5.75369	0.5494669	0.1854901	1.0632852	0.4967643
RAB3D	0.412523	1.38339	1.14156	0.288671	0.543854	-5.66536	1.094549	1.259698	1.743748	1.435545
SQRDL	0.411812	0.73708	1.15647	0.282891	0.538268	-5.64945	0.4202840	0.6420644	1.0065118	0.8794612
CLSTN3	0.411564	2.73973	1.07858	0.314144	0.566196	-5.73092	2.792655	2.275250	3.087361	2.803672
STARD9	0.411045	1.30541	1.07552	0.315425	0.566845	-5.73404	1.3901715	0.8096107	1.4437294	1.5781424
SLC20A2	0.410851	3.46504	1.15386	0.283897	0.539232	-5.65225	3.132549	3.386687	3.659792	3.681146
GPR87	0.410806	0.205403	1.11088	0.300862	0.554081	-5.69762	0.0000000	0.0000000	0.1789409	0.6426714
COL20A1	0.410779	0.321212	1.16405	0.279991	0.536034	-5.64131	0.17271067	0.05893389	0.59403732	0.45916588
TIGD3	0.409653	0.712114	1.14642	0.286777	0.541563	-5.66019	0.4389263	0.5756494	1.0393503	0.7945313
ZNF609	0.409231	4.60897	0.999396	0.348661	0.592511	-5.80949	4.759934	4.048774	5.022426	4.604745
RABAC1	0.409163	6.50478	0.846514	0.423376	0.652184	-5.94797	5.686317	6.914077	6.912510	6.506211
REC8	0.409096	0.585481	1.1406	0.289047	0.543906	-5.66638	0.4702794	0.2915867	0.9136146	0.6664443
SLC15A4	0.408741	3.47521	1.14169	0.288621	0.543854	-5.66522	3.377107	3.164576	3.780587	3.578579
TMED6	0.408559	1.89787	1.12126	0.296693	0.550587	-5.68678	1.871863	1.515328	2.018514	2.185794
CLCA2	0.40794	0.21853	1.09743	0.306334	0.559163	-5.71157	0.02911923	0.00000000	0.17980195	0.66519756
FOXF1	0.407568	1.71715	1.06053	0.321765	0.571734	-5.74922	1.741596	1.285129	2.127843	1.714018
TPBG	0.40743	4.25059	1.07577	0.31532	0.566778	-5.73378	4.291177	3.802583	4.592963	4.315656
LIPH	0.406856	0.249727	1.14542	0.287167	0.541898	-5.66125	0.09259826	0.00000000	0.34449301	0.56181735
PANK2	0.406358	3.87928	1.08277	0.312395	0.564306	-5.72664	3.939032	3.413173	4.077364	4.087558
ARMCX6	0.405537	1.55162	1.11983	0.297263	0.550785	-5.68827	1.184696	1.513005	1.830039	1.678737
COX15	0.405463	3.75166	1.10308	0.304028	0.556841	-5.70573	3.741381	3.356467	3.851721	4.057052
SMPDL3A	0.404858	0.889479	1.06393	0.320318	0.570472	-5.74579	0.8897419	0.4843588	0.8846522	1.2991639
ITGB2	0.404798	2.67911	1.08765	0.310366	0.562534	-5.72164	2.240656	2.712776	2.949791	2.813236
C2orf15	0.404746	0.603242	1.11484	0.299267	0.552779	-5.6935	0.5185513	0.2831863	0.6596339	0.9515955
ANKRD27	0.404648	2.7517	1.09431	0.307617	0.560863	-5.71479	2.750861	2.347901	2.839630	3.068427
ZBTB45	0.404646	3.45888	1.00614	0.34561	0.590279	-5.80297	3.186408	3.326701	4.039140	3.283261
SLC51B	0.404393	0.290882	1.09112	0.308931	0.561657	-5.71807	0.1773720	0.0000000	0.7125695	0.2735877
CLDN4	0.403842	3.42862	1.1123	0.300287	0.55358	-5.69614	3.158978	3.294412	3.805503	3.455572
METTL7A	0.403806	0.478684	1.13721	0.290373	0.544962	-5.66996	0.3135016	0.2400602	0.7914214	0.5697524
EVA1B	0.403197	4.44147	0.738802	0.482439	0.697044	-6.03417	3.461978	5.017769	4.876509	4.409630
DLGAP4	0.40302	3.89722	0.75914	0.470884	0.688634	-6.01866	4.324621	3.066796	4.550322	3.647134
PCDHA13	0.402921	0.606347	1.141	0.288891	0.543902	-5.66595	0.4896613	0.3201111	0.7725351	0.8430797
SETD6	0.402832	4.23385	1.0859	0.311092	0.562784	-5.72344	4.265507	3.799371	4.383488	4.487053
ALDOA	0.402197	8.64934	1.04415	0.328807	0.577555	-5.76563	8.287381	8.609104	9.117993	8.582885
ZNF221	0.401863	0.758591	0.851481	0.42078	0.650537	-5.94376	0.6020846	0.5132335	0.3469783	1.5720656
XAGE3	0.401552	0.303369	1.0138	0.342171	0.587393	-5.79553	0.0000000	0.2051870	0.1592616	0.8490287
THEM6	0.4012	1.77536	1.02093	0.338994	0.58455	-5.78856	1.273211	1.876299	2.147163	1.804748
DCAF12	0.400276	5.07196	1.12474	0.295304	0.549627	-5.68312	4.895836	4.847814	5.395366	5.148836
C15orf57	0.399503	2.62	1.06916	0.318103	0.569024	-5.7405	2.195025	2.645466	2.937347	2.702150
FHL3	0.399233	3.57708	0.94184	0.375532	0.615377	-5.86374	3.633599	3.121329	4.163489	3.389906
PNLDC1	0.399021	0.271543	1.12537	0.295055	0.549405	-5.68246	0.1440642	0.0000000	0.3869527	0.5551542
DNAJC4	0.398944	3.88087	0.993793	0.35121	0.594516	-5.81488	3.506601	3.856186	4.419410	3.741265
TBC1D25	0.398787	3.3587	1.07446	0.315868	0.567249	-5.73511	2.995647	3.322958	3.733407	3.382773
SAMD4B	0.39855	5.11338	0.990647	0.352648	0.59619	-5.81789	5.120951	4.707268	5.637300	4.988020
TSTD1	0.398135	0.424001	1.07721	0.314714	0.566396	-5.73231	0.4498669	0.0000000	0.6740158	0.5721214
VTN	0.39779	0.700786	1.07648	0.31502	0.56663	-5.73306	0.7308555	0.2729259	0.8757393	0.9236221
TCF7L1	0.397072	0.632886	1.05298	0.324996	0.574087	-5.75681	0.6303447	0.2383555	1.0207177	0.6421267
CA14	0.396452	1.28889	1.02729	0.336179	0.582834	-5.78232	0.9250932	1.2562276	1.7557394	1.2184858
CXorf40A	0.39577	2.25428	1.07542	0.315466	0.566845	-5.73414	1.848096	2.264699	2.525725	2.378611
CHRNA3	0.395714	0.258768	1.12802	0.294001	0.548639	-5.67967	0.05053832	0.07128368	0.41010700	0.50314397
ZC3HC1	0.395635	4.84697	1.06956	0.317933	0.568879	-5.74009	4.516727	4.781582	5.235865	4.853714
SLC6A16	0.395597	0.455729	1.08825	0.310116	0.562452	-5.72102	0.43237283	0.08348899	0.73093085	0.57612521
MC1R	0.395136	3.15201	1.0482	0.327052	0.576082	-5.76158	2.994861	2.914016	3.618360	3.080788
C4orf48	0.395011	5.62927	0.741637	0.480817	0.695556	-6.03203	4.723868	6.139651	6.151239	5.502303
TSPEAR	0.394785	0.991659	1.10657	0.302607	0.555772	-5.7021	0.9231320	0.6654011	1.2280767	1.1500258
PDK2	0.394701	3.34464	1.05135	0.325695	0.574758	-5.75844	3.023400	3.271170	3.774723	3.309249
KLHL33	0.39466	0.618714	0.986115	0.354727	0.598344	-5.82223	0.7131846	0.1295827	1.0541591	0.5779281
CEP295NL	0.393725	0.516891	1.10353	0.303842	0.556841	-5.70526	0.4238081	0.2162501	0.7998786	0.6276287
WASF1	0.393695	2.99688	0.719334	0.493673	0.705381	-6.04868	3.614719	1.985338	3.241819	3.145628
TIMP1	0.393674	9.2748	0.945518	0.37377	0.613719	-5.86035	9.382632	8.773289	9.785635	9.157634
IPPK	0.393607	2.16034	1.06763	0.318749	0.569587	-5.74205	1.764178	2.162888	2.461475	2.252806
ATN1	0.393258	6.13617	0.732574	0.486014	0.699364	-6.03885	6.606116	5.272975	6.755828	5.909778
LYL1	0.393224	1.82262	1.11457	0.299375	0.552779	-5.69378	1.550716	1.701300	2.062729	1.975735
TMC4	0.392576	0.500585	1.10111	0.304829	0.557387	-5.70776	0.3750289	0.2335650	0.8086260	0.5851191
TRIP10	0.392322	5.38057	0.939956	0.376437	0.615939	-5.86548	4.775375	5.593446	5.742044	5.411422
RPUSD4	0.392187	4.43014	1.06714	0.318956	0.569587	-5.74254	4.029342	4.438751	4.700439	4.552028
ASIC4	0.39212	0.588327	1.08648	0.310852	0.562784	-5.72284	0.3977301	0.3868032	0.9555264	0.6132470
ADAR	0.391969	5.92357	1.05605	0.323677	0.573057	-5.75372	5.951321	5.503857	6.032949	6.206167
CFAP161	0.391805	0.325993	1.10689	0.30248	0.555618	-5.70178	0.1084418	0.1517385	0.4209238	0.6228668
VSIG8	0.391791	0.524067	1.10167	0.304604	0.557278	-5.70719	0.3455966	0.3107472	0.5983000	0.8416250
PIAS4	0.39159	3.26894	1.03044	0.334792	0.581384	-5.77921	2.889259	3.257031	3.685567	3.243902
BRD3	0.391446	2.57321	1.00122	0.347835	0.591808	-5.80773	2.668569	2.086401	2.940974	2.596888
IRF7	0.391384	1.67992	1.08958	0.309566	0.562218	-5.71966	1.505785	1.462674	2.031304	1.719924
ZNF208	0.39127	0.76132	0.727359	0.489021	0.701322	-6.04274	0.4119882	0.7193813	0.1796811	1.7342275
EPS15L1	0.391241	3.29678	1.08366	0.312023	0.564068	-5.72573	3.005500	3.196826	3.635633	3.349175
KCNN4	0.391224	6.25671	0.971811	0.361351	0.604555	-5.8358	5.690094	6.432096	6.558700	6.345938
COA3	0.391073	7.07588	0.922942	0.384685	0.621173	-5.88101	6.436863	7.323817	7.405668	7.137159
TSKU	0.390977	4.78131	1.04549	0.328224	0.576822	-5.76429	4.521214	4.650437	5.224247	4.729358
DZIP1L	0.390504	1.31924	1.11118	0.300741	0.553979	-5.69731	1.181470	1.066512	1.489492	1.539498
TVP23A	0.390497	0.530233	1.10192	0.304501	0.557243	-5.70693	0.4269378	0.2430304	0.7829015	0.6680608
KIAA1522	0.39037	2.59738	0.794656	0.451154	0.672364	-5.9907	2.867644	1.936747	3.272578	2.312554
LZTS3	0.390154	1.99973	1.0758	0.315308	0.566778	-5.73376	1.620495	1.988817	2.208309	2.181311
KRTAP10.2	0.390088	0.195044	1.08431	0.311752	0.563738	-5.72506	0.0000000	0.0000000	0.5519340	0.2282411
GUCD1	0.389771	4.64149	1.01217	0.342902	0.587877	-5.79712	4.176404	4.716809	4.991750	4.681004
SIRT4	0.389638	1.23408	1.06003	0.321976	0.572029	-5.74972	0.8317992	1.2467146	1.4962612	1.3615290
SLC41A1	0.389472	4.92476	1.09353	0.307939	0.560974	-5.7156	4.731655	4.728396	5.247989	4.991006
SEZ6L2	0.389376	4.04475	0.929094	0.381687	0.619072	-5.87542	3.988876	3.711257	4.664579	3.814305
AANAT	0.388649	0.410776	1.11009	0.301182	0.554431	-5.69845	0.2100718	0.2228304	0.6248771	0.5853239
SLC46A3	0.388575	0.880003	1.0498	0.326365	0.575462	-5.75999	0.8665576	0.5048727	0.9259448	1.2226349
AP5B1	0.38856	4.32937	0.900426	0.395805	0.630392	-5.90122	4.478788	3.791396	4.872470	4.174833
TSACC	0.388505	1.0874	0.973219	0.360695	0.60412	-5.83447	1.2634232	0.5228779	1.3225771	1.2407336
MEGF11	0.388284	0.334832	1.06444	0.3201	0.570426	-5.74527	0.1785428	0.1028358	0.3328946	0.7250528
LIX1L	0.388218	3.0953	1.02304	0.338057	0.584203	-5.78649	3.072877	2.729506	3.516435	3.062383
SIN3A	0.388186	3.05173	0.777233	0.460762	0.680573	-6.00455	3.548531	2.166746	3.262678	3.228971
SPPL3	0.387982	4.21681	1.00883	0.3444	0.589182	-5.80036	4.177326	3.868307	4.678819	4.142778
SELPLG	0.387553	1.49036	1.10611	0.302795	0.555808	-5.70259	1.264955	1.328216	1.672417	1.695858
MLANA	0.387429	0.396623	1.00814	0.34471	0.589488	-5.80103	0.2490950	0.1567225	0.2857927	0.8948825
ALS2CL	0.386981	2.97223	1.03297	0.333683	0.580719	-5.77672	2.983845	2.573625	3.324492	3.006939
FZD7	0.386884	2.86666	0.962524	0.365701	0.608124	-5.84453	2.996108	2.350335	3.267014	2.853197
DPYSL4	0.386001	0.530982	1.07751	0.31459	0.566396	-5.73201	0.2397011	0.4362618	0.8354579	0.6125077
SLC7A7	0.385724	0.539448	1.09747	0.306318	0.559163	-5.71153	0.3163034	0.3768689	0.6766474	0.7879726
KRT18	0.385125	7.62179	1.07246	0.31671	0.567883	-5.73715	7.315710	7.542738	7.921801	7.706896
ZNF324B	0.384767	2.68307	1.07269	0.316612	0.567858	-5.73691	2.513021	2.468352	3.026531	2.724377
FOXH1	0.38467	0.333653	1.09067	0.309119	0.561902	-5.71854	0.22586996	0.05676611	0.51506646	0.53691013
RPS12	0.384589	0.463693	1.05893	0.322448	0.572107	-5.75083	0.3133908	0.2294072	0.8397346	0.4722412
P4HTM	0.384477	0.342353	1.09374	0.30785	0.560974	-5.71537	0.1937671	0.1064618	0.5821929	0.4869906
CHD4	0.384431	5.70001	1.09218	0.308495	0.561275	-5.71699	5.454817	5.560774	5.943080	5.841374
TBX4	0.383972	0.320688	1.08761	0.310382	0.562534	-5.72168	0.15870710	0.09869615	0.59805997	0.42728701
NPB	0.383932	1.77855	0.959263	0.367238	0.608698	-5.84758	1.786149	1.387022	2.290019	1.651018
TUBB1	0.383801	1.22775	0.981699	0.356762	0.600299	-5.82643	1.3046227	0.7670801	1.2145922	1.6247120
BEST4	0.383682	0.395608	1.09231	0.308439	0.561275	-5.71685	0.1850951	0.2224380	0.5316386	0.6432588
AAR2	0.383421	5.8812	0.908067	0.392005	0.627553	-5.8944	5.241810	6.137171	6.170629	5.975194
SLC27A4	0.383404	4.32183	1.00898	0.344335	0.589149	-5.80022	4.000800	4.259457	4.769998	4.257066
COA4	0.383242	7.19929	0.947874	0.372644	0.613205	-5.85817	6.630555	7.384784	7.500637	7.281185
B3GNT9	0.382664	1.02086	1.04341	0.329125	0.577822	-5.76636	0.7521620	0.9068974	1.4104284	1.0139582
PHF7	0.382524	1.4144	1.05735	0.32312	0.572548	-5.75241	1.273192	1.173085	1.776451	1.434875
TBXA2R	0.382443	0.838769	0.966347	0.363906	0.606997	-5.84094	0.8403024	0.4547925	1.3322370	0.7277433
CASP10	0.38201	1.24928	1.08592	0.311083	0.562784	-5.72341	1.001502	1.115056	1.480744	1.399835
ASPRV1	0.38183	1.29901	1.07078	0.317416	0.568582	-5.73885	1.181473	1.034708	1.600717	1.379123
C17orf67	0.38129	1.24984	1.06321	0.320621	0.570812	-5.74651	0.9989649	1.1194216	1.5801166	1.3008492
C2orf27A	0.381254	2.0863	1.06553	0.31964	0.570256	-5.74418	1.761205	2.030145	2.223481	2.330378
ZNF324	0.380753	3.84699	0.963331	0.365321	0.608124	-5.84377	3.401794	3.911431	4.286447	3.788283
LRRC42	0.380646	3.86907	1.05802	0.322836	0.572363	-5.75175	3.516767	3.840724	4.061384	4.057399
MED9	0.380547	4.12528	0.984836	0.355316	0.598913	-5.82345	3.674925	4.195092	4.498158	4.132953
KDR	0.380415	0.49702	1.03902	0.331036	0.579174	-5.77073	0.3834167	0.2302086	0.4929942	0.8814618
C9orf116	0.380403	2.27668	1.06668	0.31915	0.569781	-5.74301	1.961908	2.211047	2.514180	2.419583
RASL10A	0.380003	0.374971	1.03949	0.330831	0.579146	-5.77026	0.28756440	0.08237473	0.74251296	0.38743285
IL23A	0.379722	1.69824	0.995118	0.350606	0.59422	-5.81361	1.386014	1.630752	2.156596	1.619615
NPIPB11	0.379484	0.740651	1.0097	0.344009	0.588779	-5.79952	0.8087261	0.2930924	0.8654461	0.9953406
APOBR	0.379425	0.29158	1.05854	0.322615	0.572167	-5.75123	0.07617873	0.12755707	0.62957690	0.33300861
CCDC183	0.379296	1.89615	0.906288	0.392887	0.628366	-5.89599	1.766932	1.646073	2.526871	1.644727
GRHL3	0.379283	0.725719	1.0785	0.314174	0.566196	-5.731	0.5525740	0.5195804	0.9809462	0.8497747
RNF213	0.378696	3.01577	0.868326	0.41206	0.643989	-5.92934	3.331180	2.321669	3.208474	3.201767
SGSH	0.378679	1.725	1.0399	0.330651	0.578991	-5.76985	1.668966	1.402348	2.057101	1.771571
ANKRD39	0.378615	3.25756	0.930599	0.380957	0.61868	-5.87404	2.674747	3.461750	3.362355	3.531373
SEC61A2	0.378321	1.89116	0.965645	0.364235	0.607264	-5.8416	2.012464	1.391540	1.937740	2.222905
POMZP3	0.378064	3.88613	1.03364	0.333389	0.580444	-5.77606	3.778965	3.615223	4.264573	3.885744
ZNF668	0.377804	3.70759	0.978056	0.358448	0.602092	-5.82989	3.271910	3.765462	4.095792	3.697187
ATAT1	0.377704	0.775808	1.0133	0.342397	0.587475	-5.79602	0.8154999	0.3584121	1.0634163	0.8659030
ABHD14A	0.377337	3.88097	0.965539	0.364285	0.607268	-5.8417	3.372596	4.011999	4.177501	3.961768
CHAD	0.377198	0.476591	1.0704	0.317577	0.568611	-5.73924	0.3682096	0.2077739	0.6703665	0.6600127
ESRRB	0.376882	0.421366	1.06268	0.320846	0.571054	-5.74705	0.1312716	0.3345776	0.6561044	0.5635085
HIST1H4K	0.376589	1.92581	0.885299	0.403406	0.635907	-5.91457	2.163100	1.311923	2.311231	1.916971
PNPLA2	0.376395	5.52952	0.898092	0.396971	0.631212	-5.90329	5.378201	5.304443	6.163466	5.271967
KDELR1	0.376296	6.57874	0.994873	0.350718	0.59422	-5.81384	6.313531	6.467656	7.034373	6.499405
ZNF212	0.376062	4.0545	1.04043	0.330422	0.578828	-5.76933	3.753661	3.979286	4.376923	4.108148
KLRG2	0.3756	0.388271	1.06709	0.318979	0.569587	-5.7426	0.2461382	0.1548037	0.5185377	0.6336032
PHACTR1	0.375475	0.389902	1.06455	0.320055	0.570426	-5.74516	0.2788392	0.1254900	0.6154829	0.5397970
TOMM40L	0.375336	4.97648	0.915543	0.388314	0.624125	-5.88769	4.379525	5.198093	5.227567	5.100722
COX4I1	0.375097	0.326033	1.00673	0.345346	0.59001	-5.8024	0.0000000	0.2769696	0.7194117	0.3077509
LPAR5	0.374401	0.847887	1.05156	0.325606	0.574723	-5.75823	0.6703842	0.6509899	1.1619977	0.9081781
ARID1A	0.373356	4.42084	0.618496	0.554509	0.744764	-6.11838	5.109790	3.358542	4.985985	4.229058
APOBEC3F	0.373282	1.87591	0.97183	0.361342	0.604555	-5.83578	1.869887	1.508649	2.310915	1.814184
NPW	0.372668	1.36865	0.92201	0.385141	0.621325	-5.88185	1.5363322	0.8282977	1.7239309	1.3860357
CPZ	0.37249	1.30147	1.05595	0.32372	0.573057	-5.75382	1.090573	1.139885	1.570297	1.405140
GRTP1	0.372319	1.03203	0.933812	0.3794	0.617603	-5.87111	1.1396259	0.5521051	1.4440599	0.9923093
FIZ1	0.372051	3.82959	0.934008	0.379305	0.617603	-5.87093	3.598662	3.688460	4.381929	3.649295
GLRX	0.372004	2.75517	0.851499	0.420771	0.650537	-5.94375	2.475126	2.663217	2.442740	3.439611
CDCA3	0.371952	0.470556	1.04454	0.328635	0.577359	-5.76523	0.1582837	0.4108771	0.6759106	0.6371545
S100A9	0.371841	0.235383	1.04187	0.329797	0.578446	-5.7679	0.09892446	0.00000000	0.54797495	0.29463077
AKNAD1	0.371819	0.380706	1.04195	0.32976	0.578446	-5.76781	0.09335542	0.29623802	0.47680091	0.65643019
ZNF821	0.371615	1.91114	0.953728	0.369858	0.610867	-5.85274	1.393858	2.056814	2.073287	2.120615
NFKBID	0.371548	1.30732	1.03418	0.333153	0.580349	-5.77553	1.2792838	0.9638166	1.4929246	1.4932725
CCL24	0.371366	0.333137	0.962374	0.365772	0.608124	-5.84467	0.2949075	0.0000000	0.7976215	0.2400177
ADCY5	0.371186	0.43278	1.02053	0.339171	0.584776	-5.78895	0.3056990	0.1886745	0.4351997	0.8015463
CYP2D6	0.371095	0.878751	0.928945	0.38176	0.619072	-5.87555	0.9907217	0.3956852	1.2903818	0.8382151
CLN3	0.370984	3.57405	0.9014	0.395319	0.63039	-5.90035	2.997426	3.779688	3.912875	3.606207
RHOV	0.370779	1.04063	1.05576	0.323801	0.57312	-5.75401	0.8050005	0.9054806	1.1981126	1.2539260
PDZK1	0.370506	0.584613	1.0255	0.336971	0.583502	-5.78408	0.4586240	0.3400969	0.6060027	0.9337293
WSB2	0.37036	5.48275	1.05198	0.325424	0.57456	-5.7578	5.360488	5.234645	5.708306	5.627547
TNFRSF25	0.370226	3.66125	0.848865	0.422146	0.651719	-5.94598	3.822098	3.130180	4.214021	3.478710
PAQR7	0.370198	3.77408	1.00999	0.343881	0.588767	-5.79924	3.522566	3.655393	4.159953	3.758403
RRM2	0.37012	4.43734	0.861831	0.415407	0.645895	-5.93493	4.706024	3.798530	4.457454	4.787338
GAB2	0.370052	3.49788	1.01458	0.341824	0.587054	-5.79477	3.376237	3.249471	3.871972	3.493841
LANCL3	0.369976	0.665381	1.02862	0.335591	0.582217	-5.781	0.4279339	0.5328515	0.6979332	1.0028034
ITGB1BP2	0.369963	0.383326	1.03831	0.331348	0.579297	-5.77144	0.2131114	0.1835772	0.6975604	0.4390537
APOBEC3C	0.36986	6.10545	0.934681	0.37898	0.617603	-5.87031	5.602911	6.238134	6.456118	6.124647
TRIM62	0.369731	2.92544	0.946802	0.373156	0.613577	-5.85916	2.891818	2.589339	3.410460	2.810159
NUDT16L1	0.369643	6.0967	0.85937	0.41668	0.646731	-5.93704	5.462823	6.360941	6.464883	6.098167
RBM38	0.369506	3.8484	0.976071	0.359368	0.602767	-5.83177	3.462390	3.864907	4.227882	3.838426
PSMD13	0.369178	5.06877	0.822046	0.436329	0.661081	-5.96841	4.338300	5.430054	5.250761	5.255950
FAM21A	0.368884	1.26437	0.948972	0.37212	0.612746	-5.85715	1.1870814	0.9727787	1.1385749	1.7590522
ACACB	0.368706	0.597399	1.03486	0.332854	0.580225	-5.77485	0.4560451	0.3700463	0.9042391	0.6592646
MICA	0.368334	2.11988	0.971117	0.361675	0.604876	-5.83645	1.661619	2.209808	2.377269	2.230826
HCN2	0.368243	1.17996	0.956866	0.368371	0.609547	-5.84982	1.2761919	0.7154854	1.4976980	1.2304651
NECAB3	0.368029	4.25	0.899897	0.396069	0.630562	-5.90169	3.753185	4.378787	4.699788	4.168242
ACSL5	0.367882	0.616227	1.02578	0.336844	0.58341	-5.7838	0.3360198	0.5285526	0.6822829	0.9180529
MAP7D1	0.367481	3.98619	0.932392	0.380088	0.617747	-5.87241	3.612604	3.992287	4.465923	3.873931
BTD	0.366912	2.95452	1.01163	0.343142	0.588131	-5.79764	2.587467	2.954664	3.116382	3.159574
SSC5D	0.366762	1.17125	0.795317	0.450792	0.672027	-5.99017	1.4625666	0.5131774	1.6921661	1.0171026
NACC2	0.366498	2.85006	0.957634	0.368008	0.60916	-5.8491	2.796961	2.536668	3.304166	2.762459
FANK1	0.366305	0.827194	1.03705	0.331897	0.579585	-5.77268	0.7324145	0.5556691	0.9810551	1.0396392
DNAH1	0.366117	2.89424	0.951658	0.370841	0.611742	-5.85466	2.963767	2.458595	3.256973	2.897624
UPK1A	0.365894	0.39059	0.874799	0.408744	0.641316	-5.92373	0.1629574	0.2523284	1.0155724	0.1315012
ISY1	0.365666	1.93256	1.01883	0.339926	0.585447	-5.79061	1.663190	1.836271	2.243498	1.987296
PLEKHA7	0.365191	0.366498	1.03432	0.333088	0.580349	-5.77538	0.1951692	0.1726351	0.4588300	0.6393562
MED12	0.36468	3.80469	0.921745	0.38527	0.621421	-5.88209	3.898737	3.345966	4.214538	3.759524
LRIT3	0.364372	0.326292	0.958772	0.36747	0.608892	-5.84804	0.1860907	0.1021219	0.2240981	0.7928586
CATIP	0.364188	0.246006	1.02283	0.338153	0.584203	-5.7867	0.1278250	0.0000000	0.5383663	0.3178338
USP27X	0.364187	1.61937	1.03045	0.334786	0.581384	-5.7792	1.395813	1.478737	1.714918	1.888005
MINK1	0.363547	4.49176	0.970146	0.362128	0.605172	-5.83737	4.400000	4.219978	4.917402	4.429670
NOA1	0.363516	5.02391	0.932603	0.379986	0.617747	-5.87222	4.519972	5.164333	5.289654	5.121683
C12orf57	0.363132	7.7055	0.73208	0.486299	0.699532	-6.03922	6.852992	8.194876	8.008119	7.766012
OR51I2	0.363011	0.260227	0.914809	0.388675	0.624137	-5.88835	0.15744362	0.00000000	0.08753529	0.79593079
HOXB8	0.362772	3.09755	0.956536	0.368527	0.609648	-5.85012	3.104587	2.727744	3.490817	3.067058
TTLL3	0.362571	0.483358	1.02229	0.338393	0.584203	-5.78723	0.3812162	0.2229287	0.7437338	0.5855530
ATXN7L3	0.362419	4.84489	0.912109	0.390006	0.625664	-5.89078	4.411935	4.915428	5.290382	4.761818
EXOC3L2	0.36241	0.575885	0.996447	0.350001	0.593515	-5.81233	0.5849472	0.2044125	0.7300614	0.7841183
DUOXA1	0.362355	0.637303	1.01739	0.340567	0.586077	-5.79202	0.5720622	0.3401888	0.8738999	0.7630620
SELM	0.362235	3.96909	0.89217	0.39994	0.633343	-5.90853	3.466595	4.109351	4.387165	3.913252
RHBDD3	0.362211	3.24892	0.961524	0.366172	0.608124	-5.84547	2.966734	3.168888	3.680869	3.179173
NAA38	0.361937	6.83008	0.67697	0.518696	0.720577	-6.0791	5.877242	7.420991	7.147876	6.874231
TM2D2	0.361935	2.47797	1.01962	0.339577	0.585191	-5.78985	2.198928	2.395071	2.598000	2.719869
PHYH	0.36168	2.1262	0.971897	0.361311	0.604555	-5.83572	1.805239	2.085482	2.105437	2.508643
HSD17B3	0.361168	0.555775	1.03153	0.334314	0.581384	-5.77814	0.3647049	0.3856767	0.7168739	0.7558427
GNG5	0.360174	4.28465	0.933242	0.379676	0.61769	-5.87163	4.274003	3.935118	4.731032	4.198436
RGL1	0.360063	1.89308	0.996277	0.350078	0.593515	-5.81249	1.819501	1.606604	1.934029	2.212201
GSTM2	0.359998	1.0064	1.02674	0.336421	0.583102	-5.78286	0.8575351	0.7952602	1.2149911	1.1578004
SLC13A4	0.359966	0.69796	0.900309	0.395863	0.630392	-5.90132	0.7597203	0.2762333	0.5911899	1.1646951
CLEC3B	0.359596	1.08782	1.02504	0.337172	0.583612	-5.78453	0.9542062	0.8618277	1.2552305	1.2799957
CPVL	0.35922	1.63356	0.941647	0.375624	0.615377	-5.86392	1.163804	1.744097	1.762419	1.863921
MED26	0.358993	3.61903	0.938251	0.377258	0.616038	-5.86704	3.175390	3.703675	3.940871	3.656180
GPD1	0.35861	1.49044	0.986255	0.354663	0.59833	-5.82209	1.399494	1.222766	1.839644	1.499837
RPAP1	0.358546	5.23265	0.945511	0.373773	0.613719	-5.86035	5.086964	5.019783	5.693224	5.130616
FBXO10	0.358523	2.43708	1.00966	0.344026	0.588779	-5.79955	2.161511	2.354124	2.682519	2.550162
ABHD6	0.358517	2.72855	0.976297	0.359264	0.602729	-5.83156	2.411091	2.687485	3.073659	2.741951
TIRAP	0.358431	2.92765	0.963095	0.365433	0.608124	-5.844	2.937312	2.559562	3.263981	2.949756
CAND2	0.357249	1.12856	1.01573	0.34131	0.586881	-5.79365	1.0069797	0.8928978	1.2693724	1.3450041
GPR143	0.356269	0.499601	1.00588	0.345728	0.590279	-5.80322	0.2547769	0.3881557	0.5953219	0.7601495
SLC2A4RG	0.356201	0.568167	0.994194	0.351027	0.594478	-5.81449	0.4812925	0.2988411	0.8641153	0.6284197
FOXP3	0.356112	0.613256	0.981927	0.356657	0.600299	-5.82622	0.5836744	0.2867262	0.9011209	0.6815040
ZNF174	0.355884	3.56505	0.901405	0.395317	0.63039	-5.90035	3.137490	3.636727	3.994726	3.491258
SERHL2	0.355869	2.28053	0.943739	0.374621	0.614402	-5.86199	2.190916	2.014273	2.716175	2.200752
CBLL1	0.355499	4.00202	0.769498	0.465071	0.68369	-6.01061	4.403627	3.244920	4.099067	4.260478
ZSCAN32	0.355392	3.57097	0.945719	0.373673	0.613719	-5.86016	3.653479	3.133071	3.695306	3.802028
DHCR24	0.355186	5.87244	0.864363	0.4141	0.644766	-5.93275	5.302762	6.086940	6.194167	5.905907
DIO1	0.355162	0.241933	0.96304	0.365458	0.608124	-5.84405	0.06235500	0.06634995	0.19379110	0.64523732
SOCS1	0.355036	0.366061	0.993879	0.351171	0.594516	-5.8148	0.1829338	0.1941528	0.6826110	0.4045466
CANT1	0.354976	4.79066	0.896415	0.39781	0.631689	-5.90478	4.286752	4.939588	5.118657	4.817635
SRC	0.354937	4.72575	0.959009	0.367358	0.608818	-5.84782	4.438896	4.657672	5.109729	4.696713
SHANK3	0.354716	0.576063	0.922893	0.384709	0.621173	-5.88105	0.6129675	0.1844418	0.9750599	0.5317817
EXOC3L1	0.354247	0.391079	0.989069	0.353371	0.59686	-5.8194	0.2391953	0.1887168	0.7139871	0.4224185
FAM184B	0.354045	0.84271	0.88649	0.402804	0.635163	-5.91353	1.0094453	0.3219296	0.8742808	1.1651844
GGT1	0.353766	0.79056	0.946696	0.373206	0.613577	-5.85926	0.4841167	0.7432368	1.1861514	0.7487347
STOX2	0.353244	0.289095	0.928491	0.38198	0.619196	-5.87597	0.20096047	0.02398532	0.19007845	0.74135610
GPT	0.352777	1.49197	0.795261	0.450823	0.672027	-5.99022	1.8321318	0.7990278	1.7810706	1.5556437
INF2	0.352599	4.36166	0.900679	0.395679	0.630392	-5.90099	4.232099	4.138624	4.875079	4.200841
INO80B	0.35252	4.99636	0.930619	0.380947	0.61868	-5.87403	4.682557	4.957642	5.417940	4.927299
CHKA	0.352507	2.03984	0.986284	0.35465	0.59833	-5.82206	1.790254	1.936926	2.336458	2.095737
LRIG1	0.352443	2.11972	0.997957	0.349314	0.593064	-5.81088	2.029435	1.857560	2.262264	2.329617
FBXO33	0.35212	2.16652	0.794441	0.451272	0.672462	-5.99087	2.222426	1.758492	1.868775	2.816384
FOXD3	0.352118	2.9298	0.890496	0.400783	0.634118	-5.91001	2.578713	2.928761	3.417067	2.794643
EFNB1	0.351998	2.78497	0.89736	0.397337	0.63148	-5.90394	2.321718	2.896227	3.149688	2.772253
PCDHAC1	0.351819	0.581399	0.907237	0.392417	0.627876	-5.89515	0.5651211	0.2458586	0.4752833	1.0393341
TMPRSS9	0.351768	1.66843	0.773383	0.462903	0.682081	-6.00758	2.0139245	0.9711646	2.0580659	1.6305598
NPC2	0.351633	6.39469	0.752547	0.47461	0.691832	-6.02372	5.625742	6.812007	6.664166	6.476848
FAM122B	0.351596	2.76345	0.699612	0.505223	0.712643	-6.06304	3.271218	1.904092	2.790632	3.087871
ZSCAN22	0.351327	2.79356	0.96123	0.36631	0.608124	-5.84574	2.733989	2.501811	3.137691	2.800764
LOC100130357	0.351181	1.21026	0.884249	0.403937	0.63637	-5.91549	1.3507142	0.7186272	1.2048234	1.5668808
AMDHD2	0.351119	2.25666	0.912204	0.389959	0.625664	-5.8907	2.074546	2.087664	2.743049	2.121399
PKD1L2	0.35106	0.410452	1.00306	0.347003	0.591024	-5.80595	0.2437725	0.2260709	0.5791005	0.5928638
UNC13A	0.350825	1.6112	0.972431	0.361062	0.604497	-5.83521	1.564754	1.306827	1.897587	1.675644
DYNC1I1	0.350748	0.497009	0.997479	0.349532	0.593197	-5.81134	0.2549140	0.3883554	0.6687923	0.6759732
C10orf62	0.350702	0.221614	0.984587	0.35543	0.598913	-5.82368	0.0925261	0.0000000	0.5172055	0.2767253
REN	0.350597	0.350601	0.966733	0.363725	0.606904	-5.84058	0.1884561	0.1621493	0.7100682	0.3417319
RNF103	0.350493	1.74208	0.85397	0.419484	0.649475	-5.94165	1.916897	1.216770	1.692747	2.141905
GNAT2	0.350113	0.627226	0.684358	0.514276	0.717753	-6.07391	0.7308400	0.1734983	0.1343375	1.4702262
AKT1S1	0.34981	7.0653	0.91353	0.389305	0.624854	-5.8895	6.891307	6.889493	7.541708	6.938712
MYD88	0.349754	1.98544	0.939614	0.376602	0.615939	-5.86579	1.593013	2.028110	2.275276	2.045356
CSF1R	0.349591	0.432436	0.98479	0.355337	0.598913	-5.82349	0.3387536	0.1765268	0.6897088	0.5247530
GPX1	0.3495	9.17271	0.708189	0.500179	0.709706	-6.05684	8.340292	9.655627	9.498874	9.196045
ELMO3	0.349336	2.85106	0.962942	0.365505	0.608124	-5.84414	2.745575	2.607200	3.197848	2.853600
PLA2G6	0.348647	1.86805	0.923732	0.384299	0.620987	-5.88029	1.894387	1.493070	2.229307	1.855443
SLBP	0.348413	4.53342	0.929531	0.381475	0.619072	-5.87502	4.463393	4.255036	4.468921	4.946334
BMP4	0.348267	1.48983	0.961417	0.366222	0.608124	-5.84557	1.171321	1.460071	1.773979	1.553946
CHPF2	0.348193	5.2128	0.924959	0.3837	0.620475	-5.87918	4.999899	5.077501	5.653145	5.120641
KCNS1	0.348105	0.226027	0.929129	0.381671	0.619072	-5.87539	0.07636161	0.02758762	0.14170062	0.65845769
ZFP41	0.348062	2.77752	0.807834	0.443979	0.666959	-5.98006	2.912002	2.294981	3.328975	2.574132
ARSD	0.348042	2.55892	0.929886	0.381303	0.619006	-5.8747	2.188800	2.581007	2.899829	2.566062
B4GALT5	0.347909	5.21744	0.984002	0.3557	0.599209	-5.82424	5.135847	4.951127	5.423855	5.358936
MGAT5	0.347702	0.70901	0.976335	0.359246	0.602729	-5.83152	0.6553827	0.4149349	0.8384079	0.9273132
TM4SF1	0.347575	7.47053	0.936296	0.3782	0.617104	-5.86883	7.225136	7.368339	7.414974	7.873652
ZKSCAN3	0.346619	1.28141	0.986598	0.354505	0.598222	-5.82177	1.118721	1.097470	1.395232	1.514196
RPP25	0.346508	5.66165	0.858923	0.416911	0.64695	-5.93742	5.207985	5.768811	6.104904	5.564908
CD79B	0.346181	0.432755	0.980482	0.357325	0.60088	-5.82759	0.3326327	0.1866957	0.6601698	0.5515211
ZNF707	0.346099	0.689599	0.954223	0.369623	0.610593	-5.85228	0.6830787	0.3500199	0.9430722	0.7822237
MMP10	0.34573	0.378247	0.974864	0.35993	0.603313	-5.83292	0.2743317	0.1364321	0.4633241	0.6389004
ZNF414	0.345714	2.87858	0.812843	0.441272	0.664456	-5.97597	2.843468	2.567979	3.499547	2.603328
RXRA	0.345659	2.77014	0.948774	0.372214	0.612746	-5.85734	2.619240	2.575384	3.138283	2.747658
MYBPHL	0.345361	0.258878	0.955401	0.369065	0.610064	-5.85118	0.08354253	0.08885366	0.25585935	0.60725788
FOXJ3	0.344476	4.447	0.720748	0.492851	0.704915	-6.04764	4.759013	3.790508	4.214187	5.024285
MAFB	0.343936	0.471226	0.964143	0.36494	0.607805	-5.84301	0.3273494	0.2711664	0.7745101	0.5118783
ELL3	0.343933	1.43908	0.852655	0.420168	0.649954	-5.94277	1.425541	1.108682	1.255704	1.966384
TMEM107	0.343883	2.00816	0.959473	0.367139	0.608613	-5.84738	1.942823	1.729621	2.285892	2.074318
GFOD2	0.343694	2.7838	0.941289	0.375796	0.615382	-5.86425	2.485449	2.738454	3.113274	2.798017
RGAG1	0.343235	0.306682	0.95425	0.36961	0.610593	-5.85225	0.1155554	0.1545739	0.3181808	0.6384187
CORO1B	0.343182	7.51806	0.752922	0.474397	0.691759	-6.02344	6.792197	7.900744	7.806208	7.573098
RAB5B	0.343149	2.84919	0.969261	0.362541	0.605423	-5.8382	2.604602	2.750638	3.094883	2.946654
HDAC10	0.343137	2.41419	0.941547	0.375673	0.615377	-5.86401	2.344054	2.141196	2.755064	2.416460
SHROOM1	0.342945	2.09678	0.831698	0.431187	0.657716	-5.96041	2.225004	1.625605	2.566728	1.969771
RHOG	0.342252	5.71326	0.915134	0.388515	0.624125	-5.88806	5.508773	5.575503	6.138097	5.630683
SRRM2	0.341949	5.8255	0.495692	0.634266	0.796565	-6.19034	6.775114	4.533940	6.267692	5.725260
HAL	0.341917	0.25179	0.961072	0.366385	0.608124	-5.84589	0.12984475	0.03181846	0.30849499	0.53700130
SELL	0.341609	0.208187	0.909039	0.391523	0.627075	-5.89353	0.02402931	0.05073520	0.11370156	0.64428183
GJA4	0.341601	0.727389	0.926367	0.383014	0.619815	-5.8779	0.7081458	0.4050309	0.7312231	1.0651559
SREBF1	0.341187	5.32911	0.728496	0.488364	0.700682	-6.0419	5.475265	4.841767	6.013586	4.985821
GDE1	0.341047	4.59502	0.961185	0.366332	0.608124	-5.84578	4.312462	4.536530	4.746163	4.784923
CEP76	0.340832	1.17069	0.890047	0.401009	0.634319	-5.9104	1.0601369	0.9404154	1.0455310	1.6366859
RTN2	0.340388	2.18673	0.866546	0.412975	0.644374	-5.93087	1.765268	2.267808	2.594872	2.118981
DNAJA4	0.34009	0.492637	0.91426	0.388945	0.624381	-5.88885	0.3423965	0.3027875	0.4188437	0.9065212
SLC35A2	0.339721	6.06093	0.892158	0.399946	0.633343	-5.90854	5.684984	6.097156	6.436448	6.025132
FAM53B	0.339397	1.33527	0.927256	0.382581	0.619508	-5.87709	1.037956	1.293180	1.669335	1.340596
PROCR	0.3392	6.49634	0.709319	0.499517	0.709497	-6.05602	5.707719	6.945753	6.793725	6.538148
EGR4	0.339076	0.592062	0.95357	0.369933	0.610867	-5.85289	0.3531251	0.4919228	0.8623839	0.6608153
TMEM255A	0.33887	0.397167	0.934472	0.379081	0.617603	-5.87051	0.3178819	0.1375824	0.4057235	0.7274800
GPBAR1	0.338623	0.258853	0.95782	0.36792	0.60916	-5.84893	0.05805696	0.12102729	0.52042655	0.33590277
CLDN5	0.338584	0.444469	0.966541	0.363815	0.606959	-5.84076	0.3000255	0.2503271	0.6321268	0.5953947
CHP1	0.338431	5.37938	0.961461	0.366202	0.608124	-5.84553	5.254356	5.165963	5.607499	5.489683
B9D2	0.3384	2.6627	0.816371	0.439372	0.66341	-5.97308	2.091331	2.895660	2.986596	2.677195
SBK3	0.338338	0.214375	0.933992	0.379313	0.617603	-5.87094	0.0904125	0.0000000	0.5593904	0.2076984
TAF3	0.338304	3.05444	0.732619	0.485989	0.699364	-6.03882	3.469428	2.301150	3.237657	3.209528
SLC7A6OS	0.338115	3.80937	0.943894	0.374547	0.614359	-5.86185	3.501965	3.778659	3.924683	4.032171
SMIM1	0.337836	0.360435	0.88208	0.405037	0.637443	-5.91739	0.0000000	0.3830349	0.7626902	0.2960157
CRHR2	0.337473	0.421563	0.930222	0.38114	0.618874	-5.87439	0.43711013	0.06854223	0.56856254	0.61203575
ATP6V0D2	0.337124	0.288253	0.94876	0.372221	0.612746	-5.85735	0.18711822	0.05226479	0.35808886	0.55554174
STAR	0.336871	0.488684	0.958424	0.367634	0.609039	-5.84836	0.3837213	0.2567767	0.6510152	0.6632239
CNN1	0.336576	0.483248	0.951322	0.371001	0.611841	-5.85497	0.2288253	0.4010935	0.7043285	0.5987431
YTHDF1	0.336137	5.53078	0.892884	0.399582	0.633255	-5.9079	5.574425	5.151000	5.865074	5.532624
CARD14	0.33599	0.750958	0.904881	0.393586	0.628702	-5.89725	0.7021491	0.4637778	1.1281258	0.7097805
AARD	0.335673	0.814375	0.918544	0.386839	0.623008	-5.88499	0.8153813	0.4776958	0.8673580	1.0970653
FAM167B	0.335503	2.17288	0.807115	0.444368	0.667153	-5.98064	2.333192	1.677067	2.626428	2.054837
CNNM2	0.335483	2.92807	0.926795	0.382806	0.619636	-5.87751	2.723308	2.797350	3.271505	2.920121
TGM1	0.335331	1.18386	0.904811	0.393621	0.628702	-5.89731	1.0743704	0.9580136	1.5809188	1.1221268
BTBD19	0.335103	3.28702	0.732029	0.486328	0.699532	-6.03926	3.654669	2.584277	3.657418	3.251733
FHDC1	0.335066	0.508555	0.941778	0.375562	0.615377	-5.8638	0.4652063	0.2168378	0.6674890	0.6846878
ORMDL3	0.334626	3.99784	0.869242	0.41159	0.643648	-5.92855	3.576528	4.084522	4.344826	3.985474
MTF1	0.334598	2.45912	0.853338	0.419812	0.64978	-5.94219	2.619721	1.963911	2.525657	2.727171
C3AR1	0.334493	0.891343	0.946469	0.373315	0.613598	-5.85947	0.6680991	0.7800939	1.1363010	0.9808771
AGXT	0.334465	0.167232	0.92785	0.382292	0.619274	-5.87655	0.0000000	0.0000000	0.5022027	0.1667269
MBD6	0.334416	4.75527	0.550179	0.598148	0.774686	-6.16022	5.426130	3.749991	5.398544	4.446408
C20orf196	0.334035	2.5797	0.825005	0.434748	0.660093	-5.96597	2.020690	2.804671	2.795053	2.698378
ANGPTL6	0.333343	0.362431	0.939355	0.376726	0.616024	-5.86603	0.2616710	0.1298488	0.6223770	0.4358281
NEK8	0.332707	2.46666	0.827285	0.433533	0.659641	-5.96408	2.073666	2.526944	2.943447	2.322579
TGFB3	0.332536	0.81659	0.948868	0.37217	0.612746	-5.85725	0.6618739	0.6387703	1.0177351	0.9479803
MYL6	0.332524	9.62907	0.726666	0.489422	0.70166	-6.04326	8.898378	10.027242	9.887051	9.703617
AHRR	0.33239	2.87951	0.835575	0.429133	0.656233	-5.95717	3.029151	2.397485	3.232347	2.859069
KRT14	0.332314	2.08879	0.888516	0.401781	0.634598	-5.91175	1.668327	2.176934	2.284320	2.225570
TBC1D24	0.331728	2.59121	0.843563	0.424924	0.653387	-5.95046	2.708429	2.142254	2.959323	2.554816
C17orf107	0.33163	0.47496	0.944747	0.374138	0.614039	-5.86106	0.3563895	0.2619015	0.6657010	0.6158497
GPR19	0.331557	1.34847	0.757614	0.471745	0.689322	-6.01983	1.326572	1.038816	1.025317	2.003186
POLR2J3	0.331499	1.56628	0.825825	0.434311	0.660039	-5.96529	1.536582	1.264475	2.088329	1.375726
LAGE3	0.33142	5.79295	0.624604	0.5507	0.742066	-6.11443	4.863274	6.391216	6.079864	5.837465
ZNF2	0.331019	1.83879	0.938569	0.377104	0.616024	-5.86675	1.608358	1.738208	2.059352	1.949252
LTC4S	0.331016	0.358245	0.889348	0.401361	0.634483	-5.91102	0.3854750	0.0000000	0.6764177	0.3710888
BLOC1S3	0.330904	3.76679	0.830724	0.431703	0.658089	-5.96122	3.656256	3.546426	4.297167	3.567323
MON1B	0.330733	5.15067	0.888069	0.402006	0.634709	-5.91214	5.171868	4.798747	5.478086	5.153995
MRAS	0.329892	2.77365	0.933991	0.379314	0.617603	-5.87095	2.520504	2.696895	2.967797	2.909385
KIF3C	0.329695	3.80644	0.90667	0.392698	0.628169	-5.89565	3.556120	3.727071	4.142864	3.799718
CRYAB	0.3293	0.968245	0.820988	0.436896	0.66145	-5.96929	0.9610789	0.6461111	1.4788920	0.7868981
TMEM81	0.329143	2.15911	0.650202	0.534909	0.730804	-6.09747	2.585646	1.403435	1.931486	2.715881
KDM8	0.328983	1.22236	0.925574	0.3834	0.620127	-5.87862	1.105400	1.010338	1.497829	1.275875
C1S	0.328922	0.544385	0.939578	0.376619	0.615939	-5.86582	0.3693224	0.3905255	0.6935368	0.7241557
BRF2	0.328682	5.35906	0.744737	0.479048	0.694784	-6.02968	4.687798	5.701637	5.646045	5.400754
FAM198B	0.328509	0.481349	0.774263	0.462413	0.68183	-6.00688	0.4276606	0.2065286	0.1936497	1.0975580
BBC3	0.328389	2.31786	0.77166	0.463864	0.683025	-6.00892	1.770243	2.537082	2.753262	2.210841
NOSIP	0.328103	6.14034	0.686091	0.513242	0.717537	-6.07269	5.364878	6.587691	6.464855	6.143920
ZNF445	0.328031	1.61926	0.770196	0.464681	0.683676	-6.01007	1.867437	1.043042	1.555760	2.010781
AP5S1	0.32794	4.47764	0.870588	0.410899	0.643341	-5.92738	4.286665	4.340681	4.910620	4.372606
HSD3B7	0.32769	1.57302	0.920557	0.385852	0.621951	-5.88317	1.312880	1.505462	1.818891	1.654831
PRAF2	0.32766	6.63843	0.699118	0.505515	0.712943	-6.0634	6.910431	6.038776	7.221346	6.383182
MILR1	0.327401	0.208941	0.885048	0.403533	0.636029	-5.91479	0.0904814	0.0000000	0.1444869	0.6007963
MARCH3	0.327375	0.316272	0.933833	0.37939	0.617603	-5.87109	0.1348641	0.1703039	0.5165975	0.4433210
STX11	0.326948	0.531282	0.923512	0.384407	0.620987	-5.88049	0.4264439	0.3091724	0.7806349	0.6088773
SPON2	0.326796	2.47941	0.807317	0.444259	0.667145	-5.98048	2.113812	2.518205	2.981649	2.303958
GP1BA	0.326524	0.662011	0.859594	0.416564	0.646731	-5.93685	0.7664118	0.2310862	0.9275978	0.7229472
CPNE9	0.326496	0.231092	0.918733	0.386746	0.622937	-5.88482	0.07907351	0.05661374	0.51388033	0.27479989
ZFP36L2	0.32638	4.19847	0.603152	0.564145	0.751594	-6.12817	4.804759	3.265804	4.582198	4.141125
MAGED2	0.326248	5.83638	0.737492	0.483189	0.697515	-6.03516	5.172081	6.174437	6.155302	5.843713
EBI3	0.32624	2.36086	0.804179	0.445961	0.668288	-5.98302	2.010037	2.385449	2.874944	2.173021
KAT2A	0.325955	5.54062	0.861529	0.415563	0.645895	-5.93519	5.500039	5.255244	5.954232	5.452961
DBNDD1	0.325899	0.418052	0.915046	0.388558	0.624125	-5.88814	0.2656959	0.2445096	0.7090137	0.4529892
SPEN	0.325844	3.71084	0.478584	0.645834	0.802802	-6.1992	4.668624	2.427205	3.709658	4.037858
ATP6V1F	0.32548	7.43546	0.706752	0.501022	0.710166	-6.05788	6.692251	7.853196	7.610640	7.585767
NFASC	0.325434	1.78027	0.923964	0.384186	0.620987	-5.88008	1.653289	1.581810	2.011703	1.874263
IQCD	0.324783	0.740716	0.924181	0.38408	0.620911	-5.87988	0.6229962	0.5336535	0.9469318	0.8592829
PCNT	0.324486	2.32418	0.733494	0.485485	0.699364	-6.03816	2.686612	1.637253	2.500277	2.472561
ILDR2	0.324358	0.577229	0.892642	0.399703	0.633272	-5.90811	0.5612520	0.2688480	0.6183954	0.8604198
FCGBP	0.324239	0.344471	0.910454	0.390824	0.626419	-5.89227	0.2393246	0.1253778	0.6214041	0.3917761
MAMDC4	0.324144	0.427005	0.889474	0.401297	0.634461	-5.9109	0.3676953	0.1621701	0.7574322	0.4207215
GALR3	0.323907	0.287624	0.90206	0.39499	0.630179	-5.89976	0.1460738	0.1052659	0.6042939	0.2948607
CCDC117	0.322512	2.84118	0.701969	0.503834	0.711506	-6.06135	3.102656	2.257200	2.609211	3.395668
FADS2	0.322259	1.38512	0.895305	0.398366	0.632345	-5.90576	1.075658	1.372317	1.614807	1.477686
SNF8	0.322251	3.67217	0.821927	0.436393	0.661081	-5.96851	3.175323	3.846759	3.902968	3.763616
CEP131	0.321908	2.64626	0.87371	0.409301	0.641986	-5.92468	2.443183	2.527435	3.026760	2.587675
C1orf162	0.321676	0.494234	0.905127	0.393464	0.628686	-5.89703	0.4410734	0.2257174	0.6015379	0.7086057
HSD17B14	0.320663	0.448635	0.892996	0.399525	0.633255	-5.9078	0.3001425	0.2764639	0.7646698	0.4532621
CD37	0.320569	0.427987	0.915573	0.388299	0.624125	-5.88767	0.2599482	0.2754580	0.5675220	0.6090217
VCP	0.320278	7.41816	0.774274	0.462407	0.68183	-6.00688	6.842972	7.673069	7.681729	7.474867
TNIP1	0.319119	4.75473	0.839161	0.42724	0.655352	-5.95417	4.355659	4.834691	5.075418	4.753169
LRP1	0.318842	4.35387	0.662709	0.527295	0.72513	-6.08897	4.678520	3.710379	4.932455	4.094128
RPS10	0.318777	3.19769	0.668692	0.523677	0.724285	-6.08485	2.411689	3.664918	3.396085	3.318076
GJA9	0.318471	0.375648	0.888427	0.401826	0.634598	-5.91183	0.2780535	0.1547722	0.3973652	0.6724030
TRIM16	0.318307	4.15994	0.803344	0.446415	0.668621	-5.9837	3.665022	4.336543	4.450098	4.188081
CSDC2	0.318203	0.382851	0.900451	0.395792	0.630392	-5.9012	0.2171712	0.2303276	0.6371041	0.4468007
ZNF69	0.318152	1.58692	0.814634	0.440307	0.66408	-5.97451	1.269100	1.586596	1.449552	2.042447
GJC2	0.317406	1.91511	0.884569	0.403775	0.636332	-5.91521	1.766030	1.746784	2.227396	1.920231
ADORA2A	0.31733	0.73731	0.822899	0.435873	0.660883	-5.96771	0.8855596	0.2717295	0.9632057	0.8287434
OAZ3	0.317174	1.62624	0.838029	0.427837	0.6555	-5.95512	1.457213	1.478095	2.064229	1.505428
ZNF554	0.316485	2.59217	0.841957	0.425767	0.654284	-5.95182	2.439482	2.428366	3.016507	2.484310
TMEM150A	0.316251	1.13056	0.898212	0.396911	0.631196	-5.90318	1.0199269	0.9249509	1.3471275	1.2302531
STYK1	0.316214	0.646241	0.888401	0.401839	0.634598	-5.91185	0.3950311	0.5812371	0.7192468	0.8894485
UBE2O	0.315935	4.46756	0.829097	0.432568	0.658957	-5.96257	4.280483	4.338696	4.916564	4.334485
ABCB6	0.315801	4.37095	0.800334	0.448053	0.670087	-5.98613	3.920051	4.506050	4.726761	4.330943
ORC1	0.315333	2.91487	0.899131	0.396452	0.630858	-5.90237	2.782182	2.732216	3.109879	3.035185
LRRC8A	0.315297	5.09508	0.811108	0.442208	0.665551	-5.97739	4.647723	5.227148	5.407037	5.098428
EXD2	0.315158	2.85245	0.88963	0.401219	0.634415	-5.91077	2.598286	2.791463	2.964222	3.055842
GPR137B	0.315076	3.19952	0.888965	0.401554	0.634598	-5.91135	3.103362	2.980610	3.447178	3.266946
ZC3H3	0.313874	3.34178	0.730208	0.487377	0.700063	-6.04062	3.573071	2.796618	3.787881	3.209556
ACHE	0.313651	1.24994	0.825697	0.434379	0.660064	-5.96539	1.170867	1.015362	1.682593	1.130938
PZP	0.313571	0.176642	0.847469	0.422876	0.652006	-5.94717	0.01272654	0.02698758	0.10043851	0.56641737
ZNF618	0.313292	1.91315	0.822008	0.436349	0.661081	-5.96844	2.023962	1.489047	2.189044	1.950549
MEF2B	0.31316	0.830693	0.846744	0.423256	0.652078	-5.94778	0.5649367	0.7832889	1.1920861	0.7824600
PLEKHM3	0.312844	1.44805	0.690424	0.510664	0.716128	-6.06961	1.8430899	0.7401588	1.5177430	1.6911934
LRRC46	0.312367	1.86463	0.851168	0.420943	0.650632	-5.94403	1.647508	1.769392	2.226354	1.815281
MKNK2	0.312337	5.24905	0.8441	0.424641	0.65314	-5.95001	5.004450	5.181304	5.620984	5.189444
NDUFV3	0.312055	4.02507	0.850138	0.421481	0.651226	-5.9449	3.693839	4.044245	4.305502	4.056693
STAT6	0.311517	4.95546	0.778013	0.460329	0.680405	-6.00394	4.443938	5.155474	5.237040	4.985406
FRAT2	0.311125	3.94186	0.801289	0.447532	0.66957	-5.98536	3.628112	3.944478	4.382772	3.812068
CARHSP1	0.311101	2.7252	0.857037	0.417889	0.647949	-5.93903	2.448547	2.690758	3.023349	2.738157
TTPAL	0.311098	3.34262	0.74665	0.477958	0.693873	-6.02823	3.625647	2.748494	3.501443	3.494894
TTYH2	0.310624	0.898095	0.850652	0.421213	0.650935	-5.94447	0.6797234	0.8058417	1.2456390	0.8611748
PRDM10	0.31051	1.45031	0.745352	0.478697	0.694622	-6.02921	1.6308535	0.9592583	1.3237824	1.8873489
ATP6V0A1	0.31035	3.04397	0.860457	0.416118	0.646378	-5.93611	3.010077	2.767521	3.317438	3.080861
SHC1	0.310249	7.51779	0.812199	0.44162	0.664822	-5.9765	7.119834	7.605507	7.843932	7.501907
LIN7A	0.309763	0.201398	0.844587	0.424386	0.653121	-5.9496	0.09303358	0.00000000	0.14848588	0.56407454
TECR	0.309114	4.75627	0.83816	0.427768	0.6555	-5.95501	4.579214	4.624214	5.135485	4.686170
C3orf14	0.308114	1.23254	0.748868	0.476697	0.693361	-6.02654	0.9260172	1.2309398	0.9956178	1.7775663
ARPC4.TTLL3	0.307965	0.388321	0.873203	0.40956	0.642044	-5.92512	0.3185238	0.1501529	0.5549128	0.5296947
SPAG4	0.307923	3.04765	0.814019	0.440639	0.664284	-5.97501	2.707548	3.079826	3.408862	2.994358
GALNT5	0.307491	0.67948	0.821557	0.436591	0.661287	-5.96882	0.5185269	0.5329433	0.5758631	1.0905887
KLB	0.306711	0.321259	0.822072	0.436315	0.661081	-5.96839	0.27471031	0.06109633	0.24755985	0.70166856
EIF4EBP2	0.306577	3.80439	0.67398	0.520491	0.721521	-6.08118	4.203127	3.099086	4.071293	3.844074
LASP1	0.306547	6.91205	0.729604	0.487725	0.700291	-6.04107	6.345546	7.172004	7.245902	6.884742
CEP164	0.306391	4.2013	0.862834	0.414889	0.645647	-5.93407	4.028674	4.067536	4.469799	4.239193
TEX29	0.306318	0.414614	0.871279	0.410545	0.642879	-5.92679	0.2805127	0.2423973	0.5050303	0.6305151
PCDHA12	0.306307	1.16878	0.826129	0.434149	0.659871	-5.96504	1.232694	0.798564	1.225231	1.418642
PSMD4	0.305882	8.13619	0.664754	0.526057	0.724581	-6.08756	7.406957	8.559544	8.349530	8.228735
TAS2R5	0.305733	1.74102	0.606374	0.562113	0.75064	-6.12613	2.1829214	0.9933796	1.5173157	2.2704510
PLIN4	0.305695	0.577394	0.855248	0.418819	0.648984	-5.94056	0.5132429	0.3358501	0.8400849	0.6203988
COQ10A	0.305609	4.1513	0.789673	0.453888	0.674473	-5.99469	3.725647	4.271345	4.472299	4.135912
IDS	0.305518	3.99235	0.603095	0.56418	0.751594	-6.1282	4.549961	3.129225	4.145805	4.144417
KIF3B	0.3053	3.99735	0.645983	0.537493	0.732611	-6.10031	4.267748	3.421652	3.702181	4.597819
BSDC1	0.305285	5.09275	0.832459	0.430783	0.657492	-5.95977	4.763796	5.116421	5.364369	5.126418
ZBTB4	0.305139	4.8269	0.813301	0.441025	0.664296	-5.9756	4.582248	4.766409	5.225164	4.733771
ALDH3B1	0.304742	3.36102	0.742916	0.480087	0.69506	-6.03106	2.812334	3.604958	3.636695	3.390081
ECE2	0.304504	2.55713	0.744583	0.479136	0.694784	-6.0298	2.001720	2.808028	2.786326	2.632430
CAPN3	0.304228	0.835974	0.790397	0.45349	0.674195	-5.99411	0.9789948	0.3887246	0.8904717	1.0857042
HSD17B7	0.304002	1.07345	0.864605	0.413975	0.644766	-5.93255	0.9182401	0.9246595	1.2916749	1.1592297
SZRD1	0.303907	3.09265	0.737594	0.483131	0.697515	-6.03508	2.540712	3.340690	3.378497	3.110717
SNRPG	0.302768	1.216	0.760049	0.470372	0.688537	-6.01795	1.4316446	0.6975796	1.3281660	1.4065950
TBCB	0.302591	5.44518	0.698082	0.506127	0.713299	-6.06414	4.802080	5.785687	5.661395	5.531555
KCTD11	0.302552	3.29437	0.743546	0.479727	0.6949	-6.03058	2.905486	3.380702	3.770743	3.120549
C11orf91	0.302551	1.61322	0.789387	0.454045	0.674628	-5.99492	1.628719	1.295165	1.511307	2.017680
NCF2	0.302094	0.313144	0.85466	0.419125	0.649234	-5.94106	0.1354078	0.1887872	0.3713939	0.5569890
RHOT2	0.301936	0.690845	0.806857	0.444508	0.667284	-5.98085	0.7303412	0.3494130	1.0145146	0.6691113
C22orf46	0.301738	3.59903	0.618183	0.554704	0.744793	-6.11859	4.029864	2.866454	3.438277	4.061517
ALG1	0.301736	3.81255	0.679301	0.517299	0.72006	-6.07746	3.149633	4.173741	4.102306	3.824539
CPM	0.301488	0.831149	0.711202	0.498414	0.708873	-6.05465	0.8582164	0.5025942	0.5533121	1.4104751
SYNPO	0.301471	3.57689	0.646586	0.537123	0.732263	-6.0999	3.799340	3.052961	4.194282	3.260961
AQP7	0.30137	0.289966	0.835321	0.429268	0.656276	-5.95739	0.09103637	0.18752670	0.27739968	0.60390309
MYADM	0.301362	5.05932	0.718851	0.493953	0.705545	-6.04904	5.154810	4.662473	5.583954	4.836053
ANKRD53	0.300956	0.350457	0.839645	0.426985	0.655352	-5.95376	0.2316578	0.1683012	0.6479596	0.3539114
GJC3	0.300772	0.377438	0.852617	0.420188	0.649954	-5.9428	0.2437942	0.2103102	0.4431207	0.6125280
ARHGEF37	0.300471	2.53151	0.793079	0.452018	0.673181	-5.99197	2.126693	2.635863	2.802050	2.561449
UROD	0.300424	6.41381	0.687433	0.512443	0.717128	-6.07174	5.763655	6.763531	6.652405	6.475630
LRRC4	0.300376	0.20601	0.820366	0.437229	0.661719	-5.9698	0.07791820	0.03372628	0.14844784	0.56394865
RNF112	0.300359	0.425431	0.853104	0.419934	0.64978	-5.94238	0.2360520	0.3144504	0.6396437	0.5115762
OPN1SW	0.300256	0.202056	0.796384	0.450209	0.671661	-5.98932	0.10385684	0.00000000	0.08506914	0.61929945
NQO1	0.300172	6.62062	0.673785	0.520609	0.721529	-6.08132	5.936781	7.004277	6.739018	6.802385
HOXC13	0.300094	4.12123	0.814772	0.440233	0.664064	-5.97439	3.819181	4.123177	4.434164	4.108382
CREB3	0.299891	6.71826	0.640459	0.540887	0.735434	-6.104	5.977085	7.159548	6.988607	6.747808
BICD2	0.299547	3.92346	0.766118	0.466963	0.685255	-6.01325	4.109877	3.437498	4.110319	4.036150
KIAA0513	0.299431	2.01917	0.831468	0.431309	0.657804	-5.9606	1.878907	1.860012	2.333512	2.004270
ZNF483	0.299224	0.246078	0.818524	0.438216	0.662655	-5.97131	0.09899778	0.09393313	0.19065876	0.60072096
FBXO32	0.298935	1.5697	0.847222	0.423005	0.652006	-5.94737	1.482023	1.358446	1.781169	1.657170
TAMM41	0.29866	2.90972	0.514354	0.621769	0.788757	-6.18035	3.586589	1.934197	3.412459	2.705646
FAM193A	0.298424	2.95721	0.586871	0.574475	0.758744	-6.1383	3.475339	2.140649	3.364471	2.848365
CHD5	0.298205	0.292482	0.847908	0.422646	0.652006	-5.94679	0.1619091	0.1248500	0.5069974	0.3761708
RFTN2	0.298144	0.316244	0.847902	0.422649	0.652006	-5.9468	0.1446789	0.1896655	0.4025948	0.5280370
NUMA1	0.297915	5.06676	0.810508	0.442532	0.665961	-5.97788	4.894134	4.941467	5.432507	4.998923
UCN	0.297442	3.43762	0.675741	0.519434	0.720991	-6.07995	3.460452	3.117355	4.074922	3.097769
GPR162	0.297356	1.0752	0.826881	0.433748	0.659732	-5.96441	0.8216792	1.0313695	1.3455830	1.1021781
JAGN1	0.297319	6.20847	0.708521	0.499984	0.709706	-6.0566	5.629522	6.490095	6.485856	6.228399
PLEKHD1	0.297097	0.273977	0.828528	0.432871	0.659105	-5.96305	0.18312206	0.06773507	0.56288681	0.28216506
USP5	0.296869	6.08319	0.688259	0.511951	0.717012	-6.07115	5.463185	6.406326	6.361199	6.102051
RAVER1	0.296388	5.48529	0.546683	0.600431	0.776574	-6.16224	5.966106	4.708081	6.132761	5.134201
MLYCD	0.296322	3.41194	0.769437	0.465105	0.68369	-6.01066	2.975837	3.551726	3.679809	3.440399
YLPM1	0.296223	3.28104	0.505288	0.627824	0.792978	-6.18525	4.033440	2.232425	3.574578	3.283734
IGFBP6	0.296158	6.92291	0.586303	0.574837	0.758909	-6.13865	6.107354	7.442306	7.302414	6.839562
TBX1	0.29582	0.441705	0.825438	0.434517	0.660093	-5.96561	0.4181605	0.1694290	0.6733464	0.5058840
PPIL2	0.295793	3.38099	0.781275	0.45852	0.678674	-6.00136	3.420498	3.045694	3.737253	3.320526
LGI4	0.295717	0.417556	0.834953	0.429462	0.656495	-5.95769	0.1916845	0.3477115	0.6369263	0.4939036
CTTN	0.295595	5.79363	0.753276	0.474197	0.691625	-6.02317	5.979937	5.311731	6.024829	5.858029
RAP2B	0.295119	2.4994	0.83102	0.431547	0.65795	-5.96097	2.467394	2.236278	2.666905	2.627004
FBXL22	0.294782	0.773627	0.838994	0.427328	0.655352	-5.95431	0.6492549	0.6032159	0.9774791	0.8645566
HIST1H3E	0.294734	2.33434	0.831395	0.431348	0.657804	-5.96066	2.296323	2.077621	2.493212	2.470200
TUSC1	0.294638	4.60215	0.747708	0.477356	0.693567	-6.02742	4.170665	4.738990	4.956080	4.542852
C21orf2	0.29448	2.30823	0.822124	0.436287	0.661081	-5.96835	2.191395	2.130587	2.600559	2.310382
GLS2	0.294409	1.49301	0.688242	0.511961	0.717012	-6.07116	1.8175940	0.8740154	1.7113787	1.5690486
ZNF823	0.294314	1.20071	0.520639	0.61759	0.786153	-6.17691	1.1614357	0.9456634	0.4936539	2.2020738
CEND1	0.293998	1.27492	0.787139	0.455282	0.675759	-5.99671	1.035002	1.220838	1.657439	1.186397
PRPF8	0.293811	6.9197	0.713182	0.497257	0.708127	-6.0532	7.083252	6.462343	7.351873	6.781346
RPL34	0.293539	3.80058	0.678207	0.517954	0.720577	-6.07823	3.213103	4.094525	3.724287	4.170418
CCNE1	0.293431	2.96036	0.813526	0.440904	0.664296	-5.97541	2.654296	2.972992	3.164823	3.049328
RXFP4	0.293318	0.776478	0.710512	0.498818	0.709007	-6.05515	1.0542842	0.2053538	0.9077589	0.9385160
MFSD11	0.293275	2.58077	0.824133	0.435213	0.660446	-5.96669	2.513352	2.354910	2.824511	2.630301
PDPK1	0.293036	2.92306	0.776301	0.461279	0.680866	-6.00528	3.032346	2.520742	3.169071	2.970089
CASZ1	0.291716	0.639963	0.817858	0.438574	0.662657	-5.97186	0.5796284	0.4085820	0.8887676	0.6828738
MKNK1	0.291486	3.34741	0.825332	0.434574	0.660093	-5.9657	3.134895	3.268447	3.557090	3.429225
VPS11	0.291316	4.56047	0.680278	0.516713	0.719589	-6.07678	3.958760	4.870871	4.851557	4.560706
CST2	0.291092	0.307507	0.776634	0.461094	0.680774	-6.00502	0.0000000	0.3239228	0.6569187	0.2491884
TUBG2	0.290934	4.41341	0.778659	0.45997	0.680065	-6.00343	4.426527	4.109368	4.757199	4.360563
KPNA6	0.290576	4.86033	0.806598	0.444648	0.667416	-5.98106	4.880857	4.549236	5.011536	4.999709
FOXD4	0.289826	0.410948	0.807173	0.444337	0.667153	-5.98059	0.4207838	0.1112849	0.5752213	0.5365003
RGS16	0.289695	4.74024	0.738747	0.48247	0.697044	-6.03421	4.290137	4.900654	5.041948	4.728233
ALK	0.289401	0.45524	0.784672	0.456642	0.67678	-5.99867	0.4152838	0.2057947	0.3998014	0.8000799
SLC35E2	0.289235	1.07034	0.769193	0.465242	0.683792	-6.01085	1.1302940	0.7211545	1.3863187	1.0435989
MKRN2OS	0.28909	1.0573	0.612946	0.557983	0.747316	-6.12195	1.5129623	0.3125447	1.0761263	1.3275605
TUBAL3	0.28906	0.305101	0.813136	0.441114	0.664296	-5.97573	0.06445318	0.25668963	0.37564951	0.52361328
RIN1	0.288675	4.72055	0.748502	0.476905	0.693361	-6.02682	4.412263	4.740153	5.133159	4.596608
CCS	0.288604	3.77569	0.707046	0.50085	0.71	-6.05767	3.261427	4.001346	4.090859	3.749122
SPATA33	0.288366	1.74961	0.810044	0.442783	0.666181	-5.97826	1.700661	1.510191	1.977350	1.810233
CCDC120	0.287529	1.29441	0.701666	0.504013	0.711642	-6.06156	1.4444770	0.8568202	1.7291157	1.1472386
SUSD5	0.287376	2.32446	0.772362	0.463472	0.682641	-6.00838	2.319989	2.041549	2.266359	2.669932
RNF152	0.287302	0.345031	0.815947	0.439601	0.66358	-5.97343	0.2690684	0.1336920	0.4549662	0.5223977
KIAA1919	0.287087	2.0041	0.720585	0.492946	0.704973	-6.04776	2.151434	1.569683	1.920036	2.375254
C9orf24	0.286968	0.254227	0.799637	0.448432	0.670419	-5.9867	0.04371732	0.17776811	0.53668621	0.25873513
AKR7A3	0.286648	0.566097	0.804373	0.445855	0.668288	-5.98287	0.3378600	0.5076860	0.8086260	0.6102154
DHDDS	0.286531	4.48231	0.766339	0.466839	0.685194	-6.01308	4.129746	4.548349	4.771888	4.479269
GPR157	0.286484	1.39051	0.736252	0.4839	0.69813	-6.03609	1.398707	1.095824	1.826911	1.240590
OCEL1	0.286142	0.305759	0.758816	0.471067	0.688789	-6.01891	0.3253768	0.0000000	0.6673820	0.2302784
SLC26A10	0.285984	1.31238	0.747938	0.477226	0.693567	-6.02725	1.328870	1.009902	1.708079	1.202661
HFE	0.285522	1.6443	0.789115	0.454195	0.674734	-5.99513	1.452479	1.550595	1.958532	1.615585
ZNF579	0.285294	3.43086	0.606906	0.561778	0.750463	-6.12579	3.699238	2.877179	4.022485	3.124521
ARHGEF11	0.284993	4.5842	0.791172	0.453064	0.673954	-5.99349	4.580691	4.302722	4.816833	4.636566
C6orf106	0.284513	5.18052	0.727412	0.488991	0.701322	-6.0427	4.725060	5.351476	5.452017	5.193545
LSMEM2	0.284195	0.870246	0.796089	0.45037	0.671666	-5.98955	0.8455311	0.6107654	1.0827491	0.9419375
SF3A2	0.283787	5.84586	0.641794	0.540065	0.734629	-6.10311	6.106209	5.301722	6.323900	5.651606
CHD8	0.283712	3.44863	0.516413	0.620398	0.787889	-6.17923	4.084792	2.528760	3.327193	3.853783
C19orf38	0.283617	1.04135	0.743838	0.47956	0.694849	-6.03036	0.6095988	1.1894747	1.2294545	1.1368524
EPHB6	0.283269	0.427434	0.775586	0.461677	0.681138	-6.00585	0.2652454	0.3063542	0.7708241	0.3673137
DCST2	0.283201	0.772995	0.751081	0.47544	0.692251	-6.02485	0.8972748	0.3655144	0.9733231	0.8558678
MFSD9	0.282962	1.9627	0.797707	0.449486	0.671052	-5.98825	1.852311	1.790124	1.996052	2.212308
SHISA4	0.282507	4.93578	0.680433	0.516621	0.719589	-6.07667	4.420137	5.168910	5.295184	4.858877
BRI3	0.282495	0.389021	0.7884	0.454588	0.674963	-5.9957	0.1023350	0.3932112	0.5641666	0.4963703
LTBP4	0.282379	3.54873	0.607458	0.561431	0.750276	-6.12544	3.807434	3.007653	4.128369	3.251475
HINFP	0.28235	4.34232	0.748573	0.476864	0.693361	-6.02676	3.964835	4.437449	4.620094	4.346890
RCBTB2	0.281969	0.623119	0.73259	0.486005	0.699364	-6.03884	0.4758429	0.4884262	0.4533643	1.0748435
ROPN1B	0.281846	0.683285	0.703059	0.503192	0.711372	-6.06056	0.8701260	0.2145971	0.6333329	1.0150831
NLGN3	0.281381	0.656843	0.776204	0.461333	0.680866	-6.00536	0.6947133	0.3375907	0.7552286	0.8398382
PQLC2	0.281062	4.8579	0.725686	0.489989	0.702158	-6.04399	4.432410	5.002327	5.148099	4.848762
MAP1LC3C	0.280813	0.332197	0.799143	0.448702	0.670665	-5.98709	0.1860907	0.1974904	0.5341859	0.4110213
RIMKLA	0.280395	0.281079	0.795589	0.450643	0.671917	-5.98995	0.1339933	0.1477693	0.3403950	0.5021576
ATP6V1H	0.2801	0.626085	0.794684	0.451139	0.672364	-5.99068	0.5561710	0.4158995	0.7242879	0.8079832
MMP1	0.280078	1.76646	0.656836	0.530862	0.728312	-6.09298	1.532968	1.719880	1.443328	2.369675
SIK2	0.279966	2.96443	0.665328	0.525709	0.724528	-6.08717	3.277240	2.371652	3.123564	3.085261
EMG1	0.279434	0.987918	0.706179	0.501358	0.710327	-6.0583	0.5446505	1.1517515	1.3178348	0.9374346
PPP1R32	0.279228	1.27084	0.752722	0.47451	0.691767	-6.02359	1.061283	1.201164	1.638678	1.182225
ATP8B3	0.279093	0.424546	0.752214	0.474798	0.692028	-6.02398	0.4331495	0.1368504	0.7517870	0.3763984
CMYA5	0.278629	0.243438	0.723842	0.491056	0.703137	-6.04535	0.13184796	0.07640000	0.07301637	0.69248927
CNNM4	0.278582	2.44775	0.764727	0.467743	0.686205	-6.01433	2.213982	2.402927	2.759129	2.414944
GSTM3	0.278168	3.41557	0.650583	0.534676	0.730642	-6.09722	2.805637	3.747335	3.481855	3.627453
FUK	0.278041	2.87319	0.74314	0.479959	0.694978	-6.03089	2.805287	2.663057	3.258889	2.765537
CCDC28B	0.277988	0.668487	0.773667	0.462745	0.682061	-6.00735	0.4010284	0.6579576	0.7153354	0.8996263
NTAN1	0.277978	2.02848	0.655115	0.53191	0.728842	-6.09415	1.437358	2.341627	2.057162	2.277780
FUCA2	0.277735	4.0194	0.792509	0.452331	0.67349	-5.99242	3.886706	3.874365	4.122204	4.194338
TMEM217	0.276685	0.41563	0.778524	0.460045	0.680065	-6.00353	0.1733968	0.3811783	0.6146191	0.4933269
DNAH17	0.276424	0.619529	0.767845	0.465995	0.684427	-6.0119	0.5715191	0.3911152	0.8945502	0.6209319
GLI3	0.276145	2.48003	0.504903	0.628082	0.793076	-6.18546	3.133209	1.550706	2.814077	2.422129
MED28	0.27595	3.78629	0.695023	0.507936	0.714498	-6.06633	3.902690	3.393933	3.664251	4.184273
CD27	0.275577	0.261004	0.760762	0.469971	0.68821	-6.0174	0.2464307	0.0000000	0.2655515	0.5320332
CSNK2A2	0.275447	5.41909	0.713688	0.496962	0.707795	-6.05283	5.572536	4.990206	5.678802	5.434834
PCSK1N	0.275323	0.241821	0.74339	0.479816	0.694904	-6.0307	0.2083187	0.0000000	0.5903577	0.1686072
LDHD	0.275196	0.577141	0.749098	0.476566	0.69334	-6.02636	0.3298847	0.5492025	0.9017953	0.5276832
TMEM38A	0.275149	2.15622	0.719684	0.493469	0.705247	-6.04843	1.721057	2.316230	2.269048	2.318537
PRKCQ	0.275117	1.20535	0.777813	0.46044	0.68049	-6.00409	1.1675519	0.9680248	1.3456835	1.3401282
EPS8L2	0.27463	3.43722	0.711053	0.498502	0.708873	-6.05476	3.033222	3.566578	3.745865	3.403195
NEFH	0.274538	0.330278	0.779722	0.459381	0.679514	-6.00259	0.1368651	0.2491538	0.5179058	0.4171884
ZNF423	0.274532	0.243777	0.766073	0.466988	0.685255	-6.01328	0.18671321	0.02630876	0.50753097	0.25455532
FKBP4	0.274252	6.75741	0.599435	0.566494	0.753106	-6.1305	6.051616	7.188945	6.952176	6.836888
SLC47A2	0.273953	0.281834	0.768929	0.465389	0.683851	-6.01106	0.1404831	0.1492315	0.2891598	0.5484602
NMB	0.273887	5.30063	0.55336	0.596074	0.773601	-6.15837	4.508318	5.819059	5.614483	5.260668
DNAJC28	0.273871	0.283858	0.759882	0.470466	0.688537	-6.01808	0.22915713	0.06468798	0.27515531	0.56643178
NDRG4	0.273756	0.274676	0.769413	0.465119	0.68369	-6.01068	0.21781904	0.05777688	0.50716225	0.31594591
TAS2R46	0.273612	0.168016	0.747882	0.477258	0.693567	-6.02729	0.06242055	0.00000000	0.10025091	0.50939359
CALCOCO1	0.273517	5.51315	0.732315	0.486163	0.6995	-6.03904	5.150636	5.602151	5.764456	5.535364
ALAS1	0.273464	6.2254	0.747256	0.477614	0.693601	-6.02777	6.029103	6.148239	6.561062	6.163207
GPRC5A	0.273212	7.6989	0.764127	0.46808	0.686384	-6.0148	7.478566	7.646020	7.950507	7.720502
SCNN1D	0.273209	1.33016	0.590485	0.572173	0.757112	-6.13607	1.6340488	0.7530679	1.8547850	1.0787493
PPP2CB	0.273067	4.37885	0.769607	0.46501	0.68369	-6.01053	4.198939	4.285700	4.410371	4.620402
SOX12	0.273013	2.0249	0.647496	0.536565	0.731815	-6.09929	2.063792	1.712991	2.582491	1.740318
SLC46A1	0.273005	1.80129	0.729458	0.487809	0.700291	-6.04118	1.669151	1.660433	2.195107	1.680487
RSRP1	0.272887	3.57791	0.574884	0.58215	0.7643	-6.1456	4.045619	2.837319	3.566420	3.862293
ZNF473	0.272473	2.74703	0.724448	0.490705	0.70279	-6.0449	2.527946	2.693632	2.629104	3.137420
MGRN1	0.272161	1.80382	0.694604	0.508184	0.714611	-6.06663	1.886183	1.449301	2.202810	1.676995
TMPRSS7	0.272147	0.516344	0.754843	0.47331	0.690726	-6.02196	0.2577798	0.5027623	0.5371003	0.7677349
TMEM8B	0.271975	1.43342	0.615561	0.556344	0.745819	-6.12027	1.6466799	0.9481923	1.9588654	1.1799562
KRTCAP3	0.27168	0.75026	0.743967	0.479487	0.694821	-6.03027	0.6543131	0.5745260	1.0845598	0.6876402
SLC39A7	0.27152	4.97142	0.740626	0.481395	0.696099	-6.03279	4.665921	5.005400	5.234079	4.980282
NDN	0.271269	4.15763	0.674652	0.520087	0.72135	-6.08071	3.682808	4.361175	4.473384	4.113137
TAF4	0.270783	2.12387	0.484247	0.641993	0.801343	-6.1963	2.796839	1.180110	2.508297	2.010217
LUC7L2	0.270344	0.427165	0.763859	0.46823	0.686465	-6.015	0.2836035	0.3003834	0.4600921	0.6645822
MAP3K3	0.270298	3.6413	0.700572	0.504658	0.712238	-6.06235	3.244045	3.768258	3.951367	3.601531
ALKBH7	0.270005	5.60759	0.536482	0.607121	0.780412	-6.16806	4.790391	6.154776	5.906057	5.579120
LRCH4	0.269859	1.99302	0.718424	0.494202	0.705657	-6.04935	1.819725	1.896449	2.389900	1.865992
SPON1	0.269713	0.423923	0.751585	0.475155	0.692074	-6.02446	0.3099428	0.2681890	0.4060222	0.7115363
SFT2D2	0.2697	3.35543	0.667382	0.524468	0.724387	-6.08575	3.574189	2.866963	3.321156	3.659396
P2RY1	0.26961	0.426939	0.719989	0.493291	0.705113	-6.0482	0.3430287	0.2412395	0.3083303	0.8151571
MXRA8	0.269376	2.08292	0.633517	0.545171	0.738572	-6.10859	2.342108	1.554357	2.471166	1.964051
BTBD16	0.269276	0.30322	0.763036	0.468692	0.686731	-6.01564	0.2073818	0.1297821	0.5173221	0.3583943
FZD1	0.269226	2.60322	0.756283	0.472496	0.690011	-6.02086	2.516293	2.420923	2.855192	2.620476
TMEM139	0.269171	0.535119	0.764172	0.468054	0.686384	-6.01476	0.3342782	0.4667878	0.7106389	0.6287699
JMJD4	0.269065	4.50251	0.686642	0.512913	0.717237	-6.07229	4.083499	4.652462	4.826801	4.447289
ZNF384	0.269052	5.23944	0.702963	0.503249	0.711372	-6.06063	5.340884	4.868950	5.560252	5.187687
PLCH2	0.267745	0.395103	0.758513	0.471238	0.688836	-6.01914	0.2238557	0.2986052	0.6105352	0.4474161
DSCR4	0.267739	1.45852	0.759625	0.470611	0.688537	-6.01828	1.319365	1.329939	1.673810	1.510973
KMT2B	0.267534	4.17393	0.457014	0.660568	0.811891	-6.20995	4.843952	3.236379	4.734602	3.880797
MAPK11	0.267369	2.97392	0.695852	0.507445	0.714044	-6.06574	2.586056	3.094416	3.281038	2.934173
PIPOX	0.26715	0.34457	0.749257	0.476476	0.693298	-6.02624	0.2266377	0.1953533	0.6097465	0.3465436
PROX1	0.267044	0.786688	0.591718	0.571388	0.756936	-6.13531	0.9828905	0.3234407	0.4766536	1.3637662
VANGL1	0.266965	2.3862	0.750498	0.475771	0.692459	-6.02529	2.368592	2.136840	2.476123	2.563239
CDYL2	0.266873	1.65877	0.712558	0.497622	0.708327	-6.05366	1.736322	1.314355	1.642284	1.942139
ODF3B	0.266811	0.415128	0.728555	0.488331	0.700682	-6.04185	0.3251638	0.2382805	0.7533632	0.3437030
[truncated: 10,782 more rows]

## Sheet: Table S3
SYMBOL	logFC	AveExpr	t	P.Value	adj.P.Val	B	A375_CTRL_1	A375_CTRL_2	A375_BIBR1532_1	A375_BIBR1532_2
CSF2	6.00341	6.08604	29.2896	2.84395e-07	0.00104714	7.02508	3.208440	2.960234	9.160748	9.014752
IL1B	5.93714	4.72671	31.3453	1.9592e-07	0.00104714	7.22924	1.780043	1.736230	7.752812	7.637749
LCE1F	5.71251	3.65872	28.6101	3.2352e-07	0.00104714	6.95103	0.8122584	0.7926763	6.6362793	6.3936827
KRT6B	5.64217	4.69488	16.4853	6.57927e-06	0.0035388	4.73738	1.397866	2.349728	7.556753	7.475188
C3	5.50922	4.51272	28.5458	3.27537e-07	0.00104714	6.94385	1.725847	1.790364	7.348163	7.186494
ANGPTL4	4.97252	3.8071	24.609	7.39197e-07	0.00162226	6.43439	1.209971	1.431709	6.365269	6.221444
SERPINA1	4.92903	3.73256	18.3785	3.64334e-06	0.00291194	5.23985	0.9533295	1.5827640	6.2625838	6.1315636
FDCSP	4.6491	2.96574	24.4477	7.66329e-07	0.00162226	6.41021	0.5902805	0.6920997	5.2456990	5.3348876
CYP1A1	4.45739	3.62794	21.912	1.39544e-06	0.00162226	5.98859	1.273087	1.525408	5.912054	5.801219
PRAMEF12	4.42345	2.61494	23.6335	9.22522e-07	0.00162226	6.28366	0.3790409	0.4273949	4.8562211	4.7971206
MMP9	4.36349	2.46575	22.5027	1.20649e-06	0.00162226	6.0943	0.2329631	0.3350578	4.7246007	4.5703934
SERPINB2	4.29929	2.51005	22.7117	1.14699e-06	0.00162226	6.13055	0.3173571	0.4034605	4.6170549	4.7023415
CTSS	4.1299	2.76912	22.1392	1.31891e-06	0.00162226	6.02982	0.7139059	0.6944357	4.8072903	4.8608570
LCE1D	4.0362	2.2773	15.2894	9.89566e-06	0.00377599	4.37379	0.2516650	0.2667247	4.6070035	3.9837902
TRIM64B	3.822	2.07479	19.8567	2.38982e-06	0.00235085	5.57956	0.24760775	0.07997958	3.98529677	3.98629398
ACPP	3.81343	2.40289	20.5287	1.99279e-06	0.00212365	5.72082	0.4941962	0.4981540	4.3116560	4.3075608
BRINP2	3.80807	2.26441	19.543	2.60673e-06	0.00238106	5.51091	0.3047804	0.4159759	4.2489269	4.0879759
CD82	3.77825	3.94482	11.2012	5.26199e-05	0.00885398	2.76751	1.589119	2.522264	5.868618	5.799266
LCE1E	3.74962	2.27818	18.77	3.24817e-06	0.00276917	5.33395	0.4314235	0.3753235	4.2718676	4.0341198
PI3	3.69539	2.03452	15.9422	7.89027e-06	0.0036536	4.57712	0.3736448	0.0000000	4.0170721	3.7473514
CXCL2	3.65718	3.57228	8.12042	0.000284224	0.0152717	1.00687	2.423714	1.063667	5.449474	5.352262
LCN2	3.62453	6.06191	17.5868	4.62996e-06	0.00311621	5.03969	4.389193	4.110092	7.924526	7.823825
IL37	3.51084	1.98417	18.0851	3.97701e-06	0.00298425	5.16724	0.3148364	0.1426654	3.7025012	3.7766707
C15orf48	3.49487	2.7469	16.5673	6.40448e-06	0.0035388	4.76091	0.9285143	1.0704129	4.6445520	4.3441092
TRAF1	3.42739	5.11349	16.8673	5.80987e-06	0.00353793	4.84555	3.265907	3.533676	6.855644	6.798721
SPRR2D	3.39721	6.31476	15.7991	8.28546e-06	0.0036536	4.53357	4.796055	4.436253	8.007849	8.018883
SERPIND1	3.36777	2.79098	15.2487	1.00394e-05	0.00377599	4.36071	0.9166009	1.2975952	4.5307617	4.4189820
RTL1	3.3673	1.97384	17.0677	5.44892e-06	0.00348404	4.90084	0.3832472	0.1971383	3.7170358	3.5979549
IL6	3.3355	3.95364	17.9043	4.20053e-06	0.00298425	5.12159	2.275908	2.295866	5.642813	5.599969
SPON2	3.26789	3.94995	14.0171	1.58225e-05	0.00481757	3.94048	2.113812	2.518205	5.701893	5.465901
PLAT	3.26637	6.31952	11.2246	5.20384e-05	0.00885398	2.77872	4.322887	5.049792	8.033048	7.872367
GAST	3.25678	2.31718	12.0778	3.52042e-05	0.00789809	3.16898	0.4309504	0.9466220	4.1431066	3.7480305
TMEM132A	3.24654	5.12932	13.2342	2.15601e-05	0.00552613	3.64665	3.760855	3.251240	6.829836	6.675335
HLA.DQA1	3.2445	4.31371	11.2301	5.19036e-05	0.00885398	2.78134	2.327135	3.055781	5.985711	5.886197
LAMB3	3.23066	4.80725	13.8931	1.65988e-05	0.0049364	3.89541	2.966029	3.417803	6.477454	6.367697
CXCL8	3.22778	6.08437	11.7124	4.14827e-05	0.00847225	3.00607	4.154859	4.786094	7.576509	7.820006
LYPD3	3.2031	4.34279	10.6057	7.03255e-05	0.00947638	2.47284	2.354489	3.127995	6.028091	5.860601
TNFRSF9	3.17785	1.9242	15.9996	7.73798e-06	0.0036536	4.59443	0.2367360	0.4338077	3.5759490	3.4502916
ICAM1	3.16366	5.96006	16.4568	6.64147e-06	0.0035388	4.72915	4.385821	4.370640	7.623832	7.459954
CXCL3	3.16137	3.24639	13.8281	1.70234e-05	0.00494762	3.87157	1.875172	1.456249	4.898997	4.755157
FCRLA	3.13366	3.63052	14.9872	1.10241e-05	0.0040279	4.27548	1.905164	2.222224	5.214980	5.179725
SH2D2A	3.10186	3.98185	15.8316	8.19377e-06	0.0036536	4.5435	2.467155	2.394686	5.629799	5.435769
NLRP3	3.09311	2.44587	14.3662	1.38558e-05	0.00478886	4.06459	0.7213962	1.0772325	4.0251483	3.9596998
APLP1	3.05336	3.07885	15.5614	8.99456e-06	0.00373037	4.45999	1.648861	1.455473	4.646561	4.564500
PRAMEF2	3.03378	1.70888	16.2621	7.0844e-06	0.00362381	4.67246	0.1699848	0.2139912	3.2073168	3.2442098
SLAMF9	3.01825	4.69797	8.74449	0.000193742	0.0134023	1.41579	2.708415	3.669281	6.260697	6.153493
MRGPRX4	2.94951	3.63391	10.9979	5.80026e-05	0.009138	2.669	1.844956	2.473356	5.176555	5.040783
EBI3	2.93562	3.66555	13.2618	2.13201e-05	0.00552613	3.65739	2.010037	2.385449	5.202584	5.064135
APOBEC3H	2.91724	2.11139	15.546	9.04298e-06	0.00373037	4.45516	0.6191850	0.6863619	3.5412000	3.5988326
PRAMEF4	2.88271	1.66925	14.056	1.55877e-05	0.00481757	3.95452	0.09352209	0.36227144	3.05760006	3.16361117
TIMP1	2.82225	10.4891	10.7733	6.47168e-05	0.00944687	2.55768	9.382632	8.773289	11.937577	11.862838
ZSCAN4	2.79209	1.55147	13.1538	2.22782e-05	0.00552613	3.61518	0.1018522	0.2090055	2.7854462	3.1095864
ISLR	2.78626	2.59385	9.50402	0.000125395	0.0119267	1.87433	1.5764828	0.8249512	4.0160734	3.9578838
KRT15	2.78051	4.36844	9.84671	0.000104096	0.0110932	2.06845	2.624790	3.331576	5.754648	5.762733
CYP4F3	2.74105	1.64709	14.0255	1.57714e-05	0.00481757	3.94352	0.3648841	0.1882529	2.9687328	3.0664960
LCE1C	2.71954	1.70838	14.5939	1.27279e-05	0.00452122	4.14335	0.3732905	0.3239228	3.0669740	3.0693173
COL22A1	2.6854	1.66235	14.0225	1.57893e-05	0.00481757	3.94245	0.3869066	0.2524005	2.9667107	3.0433927
EGR2	2.6847	2.38511	8.41192	0.000236904	0.0142232	1.20171	1.4730960	0.6124145	3.7555984	3.6993118
PVRL4	2.67165	3.53797	14.1705	1.49206e-05	0.00481757	3.99551	2.226986	2.177312	4.921338	4.826259
FAM222A	2.64132	2.33444	10.6963	6.72243e-05	0.00944687	2.51891	1.2638935	0.7636687	3.7577882	3.5524164
IL2RG	2.62514	1.86651	13.385	2.0286e-05	0.00551953	3.70498	0.4581143	0.6497734	3.2209736	3.1371972
ADAM19	2.61866	3.23559	13.1327	2.2471e-05	0.00552613	3.60689	1.922043	1.930467	4.665319	4.424522
TMEM2	2.61862	4.0284	5.95126	0.00135451	0.0230673	-0.693683	3.344096	2.094075	5.117038	5.558379
LCE1B	2.58917	1.54174	13.4851	1.94885e-05	0.0054178	3.74326	0.1946416	0.2996696	2.8976440	2.7750040
FN1	2.5873	4.14629	6.66685	0.00077349	0.0188326	-0.0785256	3.417754	2.287528	5.475229	5.404655
ECM1	2.56554	3.93801	13.2215	2.1672e-05	0.00552613	3.64168	2.631915	2.678578	5.311058	5.130509
TCN1	2.55985	2.54026	11.5299	4.51069e-05	0.008665	2.92238	1.103858	1.416810	3.692324	3.948045
EGR1	2.55514	6.79135	5.59345	0.00182837	0.0258641	-1.0245	6.204142	4.823422	8.134765	8.003082
SHISA2	2.52624	3.18246	6.78305	0.000709471	0.0184658	0.0159263	2.455578	1.383105	4.432069	4.459096
KRT6A	2.5203	1.43631	13.4933	1.94253e-05	0.0054178	3.74636	0.1598679	0.1924527	2.6683009	2.7246149
IL1A	2.51658	4.02103	10.1367	8.93286e-05	0.0103849	2.22698	2.533626	2.991851	5.129572	5.429057
NFKBIA	2.5107	6.00478	10.2502	8.42287e-05	0.0100665	2.28763	4.495954	5.002902	7.338504	7.181754
TFPI2	2.50708	5.2174	11.9694	3.69428e-05	0.00800719	3.12128	3.803204	4.124513	6.478630	6.463249
TRIM43	2.50417	1.37553	12.8659	2.509e-05	0.00605379	3.50045	0.17135973	0.07553912	2.54374367	2.71149234
C1QTNF1	2.48112	3.43459	10.4091	7.76503e-05	0.00975984	2.37129	1.978017	2.410044	4.797412	4.552891
MAB21L1	2.47216	3.11722	12.1676	3.38364e-05	0.00772679	3.2081	1.756251	2.006037	4.297511	4.409094
HLA.DQA2	2.45203	2.31383	8.3828	0.000241194	0.0143221	1.18255	0.7141949	1.4614219	3.5771793	3.5025070
MAPK13	2.44489	2.14497	11.5892	4.38913e-05	0.00863511	2.94972	1.088292	0.756753	3.355711	3.379106
C11orf96	2.42796	3.36333	11.3677	4.86457e-05	0.00885398	2.84661	2.067085	2.231610	4.731973	4.422637
TRIM43B	2.39824	1.26676	12.2065	3.32635e-05	0.00772679	3.22493	0.1352792	0.0000000	2.3837908	2.5479713
AQP3	2.39733	3.60315	9.2732	0.000142636	0.0124695	1.73924	2.115560	2.693404	4.877945	4.725687
FERMT1	2.37255	5.27864	6.74023	0.000732318	0.0186924	-0.0187119	4.589096	3.595633	6.475530	6.454306
GFPT2	2.3623	4.78266	10.7944	6.40494e-05	0.00944687	2.56824	3.413648	3.789366	6.004804	5.922815
ACAN	2.34758	1.49398	12.5794	2.83121e-05	0.00670473	3.38297	0.3443065	0.2960604	2.6854136	2.6501214
TRIM49B	2.31666	1.36553	11.0578	5.63524e-05	0.00900793	2.69825	0.2399437	0.1744560	2.3662182	2.6815059
IFI6	2.30884	4.94635	8.57606	0.000214333	0.0138064	1.30844	3.477246	4.106608	6.177145	6.024384
C11orf91	2.28914	2.60651	10.7781	6.45648e-05	0.00944687	2.56008	1.628719	1.295165	3.712766	3.789398
SERPINA6	2.27226	1.2547	11.9919	3.65729e-05	0.00800719	3.13125	0.07723908	0.15989358	2.34438890	2.43727062
CIT	2.25415	3.76793	5.62061	0.0017863	0.0255803	-0.998802	3.229984	2.051725	4.852846	4.937165
PRDM1	2.24029	2.36241	6.26896	0.00104966	0.0207141	-0.413232	1.7487074	0.7358182	3.4529931	3.5121114
SPINK4	2.23501	1.684	8.63789	0.00020649	0.0138064	1.34809	0.8275076	0.3054771	2.6550123	2.9479994
PNRC1	2.22704	3.9711	6.87385	0.000663711	0.0178854	0.0887307	3.283089	2.432067	5.200847	4.968392
STRA6	2.21046	4.02947	11.3024	5.01606e-05	0.00885398	2.81576	2.836286	3.012203	5.185739	5.083665
CD74	2.19254	10.4559	10.8287	6.29797e-05	0.00944687	2.58539	9.492986	9.226292	11.540141	11.564216
TAGLN3	2.19077	5.6017	6.13617	0.00116624	0.0214897	-0.52898	4.006813	5.005813	6.781904	6.612258
PRAMEF1	2.18962	1.11874	11.3869	4.82106e-05	0.00885398	2.85563	0.047857	0.000000	2.292640	2.134459
WNT9A	2.18781	3.01215	10.8798	6.14242e-05	0.00944687	2.61082	1.799847	2.036648	4.154661	4.057450
MRGPRX3	2.18605	1.7747	11.516	4.53984e-05	0.008665	2.91593	0.7457939	0.6175558	2.8783938	2.8570533
SIGLEC14	2.18555	1.16287	11.6985	4.17475e-05	0.00847225	2.99973	0.08168439	0.05849800	2.22453624	2.28675563
NREP	2.17974	3.14889	8.87612	0.000179249	0.0129949	1.4982	2.325307	1.792728	4.257093	4.220418
GDNF	2.17106	1.9851	10.6416	6.90775e-05	0.00947638	2.49114	1.0231341	0.7760045	3.1368725	3.0043913
GPR153	2.1641	4.59466	5.86067	0.00145946	0.0235947	-0.775904	4.041525	2.983689	5.715118	5.638305
TRIM64	2.15945	1.13876	11.2666	5.10146e-05	0.00885398	2.79875	0.03808230	0.07997958	2.29415747	2.14281178
C10orf90	2.12508	3.0049	7.65338	0.000385166	0.016049	0.67973	2.278383	1.606349	3.998850	4.136037
SIRPB1	2.12497	2.21574	10.5299	7.30474e-05	0.00947638	2.43397	1.281101	1.025411	3.307065	3.249395
HELZ2	2.12315	3.43212	4.40386	0.0055399	0.0413568	-2.25043	3.108603	1.632495	4.536155	4.451235
CEBPD	2.12062	3.16847	7.6793	0.000378568	0.016049	0.698391	1.779510	2.436805	4.314105	4.143441
SLC25A45	2.11277	3.31054	8.89888	0.000176873	0.0129949	1.51232	2.489443	2.018870	4.437732	4.296128
DOC2A	2.09545	2.02737	9.04617	0.000162362	0.0129298	1.6028	1.209587	0.749706	3.078775	3.071425
S1PR4	2.09425	4.34921	5.82225	0.00150678	0.0238957	-0.811079	3.809968	2.794200	5.459887	5.332788
CEACAM1	2.08084	1.60127	10.7393	6.58095e-05	0.00944687	2.54061	0.6491724	0.4725219	2.6174402	2.6659273
S100A1	2.08045	4.83168	11.1385	5.42155e-05	0.00888178	2.73735	3.767499	3.815405	5.893903	5.849908
TIMP3	2.07861	7.20777	9.89351	0.000101529	0.0110932	2.09439	6.307427	6.029496	8.332514	8.161636
NR4A1	2.07704	5.62477	5.83473	0.00149122	0.023765	-0.799632	5.083080	4.089424	6.751591	6.574996
RAET1L	2.07665	2.76472	7.5855	0.00040309	0.0163642	0.630573	1.397451	2.055354	3.861911	3.744184
TMEM88	2.06248	2.6131	5.20742	0.00256888	0.0292687	-1.40027	2.162674	1.001051	3.621191	3.667489
IRAK2	2.05745	3.14517	9.4961	0.000125944	0.0119267	1.86976	1.931197	2.301694	4.168485	4.179310
ALPL	2.03983	1.23771	10.5444	7.25174e-05	0.00947638	2.44143	0.1305429	0.3050548	2.2787533	2.2364975
C1R	2.03785	2.74396	7.92358	0.000322458	0.0155754	0.871298	1.433439	2.016628	3.811285	3.714478
MMP19	2.03115	3.08493	10.5851	7.10524e-05	0.00947638	2.46232	2.068818	2.069888	4.180471	4.020527
HES2	2.02736	2.13493	9.68869	0.000113342	0.0115953	1.97988	0.967731	1.274774	3.193999	3.103229
SH2D1B	2.02039	1.7473	9.94408	9.88389e-05	0.0109693	2.12226	0.6029537	0.8712522	2.7842083	2.7307709
COL17A1	2.01705	1.73576	10.2588	8.38542e-05	0.0100665	2.29222	0.8297604	0.6247200	2.7752537	2.7133213
TRIM22	2.00572	1.66521	10.4041	7.78467e-05	0.00975984	2.3687	0.5767514	0.7479473	2.6636689	2.6724615
DAPK1	2.00324	1.52423	10.7053	6.69261e-05	0.00944687	2.52345	0.5560490	0.4891667	2.5430081	2.5086783
FBXO32	2.0016	2.42103	10.5544	7.2156e-05	0.00947638	2.44654	1.482023	1.358446	3.407075	3.436591
CNKSR3	1.99086	3.32774	9.03003	0.000163883	0.0129298	1.59296	2.523647	2.140969	4.371452	4.274873
IGFBP3	1.98523	7.48553	7.21187	0.000521056	0.0169981	0.352295	6.172600	6.813227	8.584719	8.371568
SPINT1	1.98389	1.70661	9.93145	9.9503e-05	0.0109693	2.11531	0.7925973	0.6367289	2.7925508	2.6045590
IL23A	1.97969	2.49823	9.52506	0.000123948	0.0119267	1.88647	1.386014	1.630752	3.583096	3.393042
MAST4	1.9565	2.65752	4.20178	0.00681611	0.0458567	-2.47949	2.3878136	0.9707227	3.5986406	3.6729036
GAP43	1.95517	2.56236	8.05297	0.000296698	0.0153325	0.960778	1.346375	1.823183	3.643170	3.436726
C3AR1	1.95494	1.70156	10.2566	8.39486e-05	0.0100665	2.29106	0.6680991	0.7800939	2.7226618	2.6354029
KRT79	1.9509	1.12981	10.4426	7.63384e-05	0.00975984	2.38879	0.1364455	0.1722766	2.0773806	2.1331410
ZC3H12A	1.94031	3.85188	9.7166	0.000111641	0.0115953	1.99564	2.997639	2.765799	4.859406	4.784661
PDZRN3	1.9297	1.88023	9.19449	0.000149139	0.012607	1.69234	1.077590	0.753177	2.838653	2.851510
ASB9	1.92868	2.27218	7.47484	0.00043444	0.0164367	0.549529	1.011978	1.603688	3.268597	3.204437
CLU	1.92174	3.21336	10.1156	9.03173e-05	0.0104052	2.2156	2.310380	2.194593	4.206351	4.142100
HSPG2	1.921	4.38008	3.31825	0.0181416	0.0794782	-3.55474	4.329143	2.510007	5.393907	5.287249
TRIML2	1.91319	2.81508	9.50033	0.000125651	0.0119267	1.8722	1.972682	1.744293	3.832237	3.711127
CHST2	1.89943	2.50541	8.58174	0.000213598	0.0138064	1.31209	1.356977	1.754410	3.477660	3.432594
CTSK	1.89668	3.32393	8.95099	0.000171573	0.0129949	1.54451	2.208802	2.542384	4.242505	4.302032
PLEKHG5	1.89099	5.37204	9.9445	9.8817e-05	0.0109693	2.12249	4.493501	4.359594	6.326789	6.308280
LPXN	1.87899	5.84385	7.76104	0.000358611	0.016049	0.756832	4.650208	5.158508	6.827885	6.738803
UBD	1.878	0.974335	10.0883	9.16154e-05	0.0104605	2.20085	0.01700453	0.05366857	1.92220910	1.90445929
RRAD	1.87537	1.33482	8.45781	0.000230325	0.0140257	1.23176	0.5582931	0.2359799	2.3929650	2.1520412
KDM6B	1.86798	5.67856	3.15705	0.0219747	0.0900968	-3.76325	5.677353	3.811787	6.649114	6.575992
ADAMTS7	1.86166	2.63716	8.16788	0.000275816	0.0152026	1.03906	1.920168	1.492489	3.617434	3.518548
SLC52A1	1.861	1.32808	8.75625	0.000192392	0.0134023	1.42321	0.5112271	0.2839298	2.3871800	2.1299839
STC1	1.85126	3.54898	4.58555	0.00462082	0.0380987	-2.04981	3.172937	2.073761	4.244986	4.704237
DHRS2	1.8497	1.5573	9.19903	0.000148754	0.012607	1.69506	0.5229561	0.7419556	2.4160010	2.5483057
RASAL1	1.84862	1.5853	9.58584	0.000119879	0.0118348	1.92137	0.5959790	0.7259887	2.5661152	2.4530981
CIITA	1.84767	3.64777	8.93932	0.000172744	0.0129949	1.53732	2.868217	2.579660	4.614874	4.528339
RCSD1	1.84556	1.0126	9.87768	0.000102389	0.0110932	2.08563	0.05823726	0.12139511	1.94647435	1.92428439
TNFRSF21	1.84005	4.11229	5.00589	0.00309013	0.0317584	-1.60462	3.714871	2.669649	5.100754	4.963867
IRS2	1.83625	6.00264	2.97617	0.0273776	0.10261	-4.00118	6.060122	4.108917	6.984420	6.857112
ADGRF1	1.83068	1.00653	9.32121	0.000138831	0.0124695	1.76764	0.12139610	0.06097857	1.82027065	2.02346071
ADAMTS4	1.83006	1.4199	9.29819	0.000140641	0.0124695	1.75404	0.6055518	0.4041900	2.2955157	2.3743524
TSPAN10	1.82573	2.50487	7.92995	0.000321129	0.0155754	0.87574	1.366848	1.817159	3.437646	3.397829
F11R	1.82225	4.05168	7.87313	0.000333203	0.0155754	0.83602	2.924396	3.356713	5.039751	4.885855
CD83	1.82213	3.43797	6.77024	0.000716219	0.0184658	0.00558204	2.216922	2.836886	4.442045	4.256030
GAS2L1	1.80984	3.4207	9.03907	0.00016303	0.0129298	1.59847	2.567168	2.464380	4.438676	4.212558
SPOCK1	1.80905	3.39725	4.99829	0.00311205	0.0318184	-1.61244	3.008137	1.977300	4.273768	4.329776
KREMEN2	1.80855	1.83692	7.34648	0.00047443	0.0168813	0.454083	0.7633097	1.1019796	2.9495023	2.5328784
NFKB2	1.8063	6.92439	7.64804	0.000386542	0.016049	0.67588	5.791150	6.251325	7.903745	7.751326
INPP5D	1.80008	1.39677	8.9063	0.000176107	0.0129949	1.51692	0.4043073	0.5891648	2.3915682	2.2020592
AMACR	1.79487	4.25903	9.5653	0.000121236	0.0118348	1.90961	3.387732	3.335456	5.120878	5.192045
JUP	1.79084	2.90699	9.60287	0.000118766	0.0118348	1.93111	2.018130	2.005015	3.829133	3.775682
APOL3	1.79072	1.46433	8.66037	0.000203722	0.0137115	1.36244	0.4232613	0.7146881	2.3990555	2.3203348
ANGPT4	1.78991	3.08619	8.69477	0.000199569	0.0135749	1.38432	2.127638	2.254820	3.848101	4.114182
CD93	1.78756	1.12406	9.26521	0.00014328	0.0124695	1.7345	0.3169026	0.1436581	2.0198086	2.0158710
CAPN5	1.78458	3.64391	9.26448	0.000143339	0.0124695	1.73407	2.750858	2.752378	4.620932	4.451460
NFATC2	1.78429	2.45945	3.98244	0.00859464	0.0521882	-2.73529	2.244130	0.890484	3.321108	3.382082
ZSWIM4	1.78128	4.31352	7.5455	0.000414106	0.016367	0.601413	3.662534	3.183227	5.238470	5.169862
IL20RB	1.77478	2.43824	8.71338	0.000197364	0.0134968	1.39612	1.413735	1.687973	3.347570	3.303702
TSPAN11	1.77328	3.28305	8.50977	0.000223132	0.0139585	1.26559	2.240264	2.552565	4.185299	4.154082
TMEM40	1.77186	1.31788	8.5727	0.000214769	0.0138064	1.30627	0.2814685	0.5824270	2.2100978	2.1975110
MAF	1.76956	2.76258	7.26217	0.000503033	0.0168813	0.390538	2.133255	1.622338	3.705789	3.588929
OAS1	1.76455	2.40459	9.48327	0.00012684	0.0119267	1.86234	1.535233	1.509392	3.274272	3.299457
KIAA0040	1.76005	5.70451	8.77834	0.000189887	0.0133422	1.4371	4.715497	4.933472	6.646578	6.522492
FOS	1.74421	3.77352	8.887	0.000178109	0.0129949	1.50496	2.994360	2.808470	4.695124	4.596125
UBA7	1.7429	1.82897	9.35655	0.000136107	0.0124324	1.78844	0.9542252	0.9608219	2.7233648	2.6774808
HLA.DRB5	1.74218	5.30726	4.72436	0.00403528	0.0359604	-1.89991	3.909358	4.962970	6.230301	6.126393
PARM1	1.74074	1.43265	9.27389	0.00014258	0.0124695	1.73965	0.6049010	0.5196514	2.2890638	2.3169742
THBS2	1.7365	2.24734	7.03245	0.000591766	0.017558	0.213833	1.647807	1.110366	3.085979	3.145197
ENC1	1.7103	3.37345	7.98012	0.000310893	0.0154097	0.910574	2.694309	2.342300	4.204501	4.252709
NTN1	1.70838	1.26313	8.89094	0.000177698	0.0129949	1.5074	0.4788470	0.3390291	2.1595872	2.0750530
SSC5D	1.70744	1.84159	4.97569	0.00317829	0.0319845	-1.63575	1.4625666	0.5131774	2.7627531	2.6278804
ADGRE1	1.70644	2.44303	5.03284	0.00301384	0.0315144	-1.57697	1.119390	2.060241	3.325661	3.266840
GPX3	1.69937	3.00233	6.83167	0.000684528	0.0181	0.0550172	1.879958	2.425321	3.816995	3.887027
HIST1H2BG	1.69461	2.8596	7.87464	0.000332876	0.0155754	0.837075	1.841720	2.182877	3.647721	3.766093
KRTAP19.1	1.69195	0.946942	8.41296	0.000236754	0.0142232	1.20239	0.2019331	0.0000000	1.7140917	1.8717442
PATL2	1.69129	1.32355	7.68739	0.000376538	0.016049	0.704196	0.6653779	0.2904230	2.1123333	2.2260530
MMP14	1.68897	6.25625	8.05605	0.000296114	0.0153325	0.96289	5.265030	5.558502	7.168279	7.033189
RRM2	1.68748	5.09602	5.10943	0.00280852	0.0304368	-1.49891	4.706024	3.798530	5.945079	5.934435
SIGLEC5	1.68732	0.878012	8.13519	0.000281575	0.0152026	1.01691	0.06870399	0.00000000	1.87111018	1.57223567
KRT9	1.68644	1.28199	7.85117	0.00033801	0.0156046	0.820596	0.2595857	0.6179495	2.1205745	2.1298327
ATP2B4	1.68633	4.77398	4.28447	0.00625723	0.0442086	-2.385	4.499724	3.361905	5.523198	5.711098
ARNT2	1.68281	4.94	8.84228	0.00018285	0.0130492	1.47714	4.033165	4.164033	5.802736	5.760082
KRTAP13.2	1.68017	0.874201	7.78924	0.000352011	0.015928	0.776862	0.0682303	0.0000000	1.8932795	1.5352959
HLA.DRB1	1.67577	4.61173	5.21587	0.00254933	0.0292263	-1.39182	3.338529	4.209162	5.465416	5.433817
CARNS1	1.66989	1.35365	8.4892	0.000225948	0.0139585	1.25222	0.6014899	0.4359091	2.1199270	2.2572604
PXYLP1	1.66889	3.15689	4.98834	0.00314103	0.0319095	-1.6227	2.763403	1.881484	3.852245	4.130422
SLC2A6	1.66203	3.52074	6.61758	0.000802642	0.0190483	-0.119009	2.410407	2.969037	4.381484	4.322023
MAN2B1	1.65553	5.968	5.56243	0.0018778	0.0261899	-1.05395	4.758652	5.521813	6.856760	6.734770
RTP4	1.65156	1.43358	8.73416	0.000194935	0.0134023	1.40927	0.6119107	0.6037025	2.3180051	2.2007216
FETUB	1.64883	1.19854	7.5045	0.000425765	0.0164367	0.571366	0.2337903	0.5144634	1.8875826	2.1583311
NFKBIZ	1.64847	4.10112	3.52628	0.014251	0.0690049	-3.291	3.989009	2.564765	4.892983	4.957728
SEMA3G	1.64479	2.54478	8.22423	0.000266206	0.0149309	1.07705	1.820229	1.624541	3.441972	3.292379
SMAD3	1.6409	4.85028	6.07162	0.00122829	0.0219958	-0.586007	4.352743	3.706910	5.716873	5.624577
FAM83H	1.63798	2.19236	6.98373	0.000612855	0.017595	0.175678	1.605417	1.141319	3.064029	2.958663
SQRDL	1.63363	1.34799	8.01942	0.000303138	0.0153325	0.937717	0.4202840	0.6420644	2.2485463	2.0810559
TRANK1	1.63148	2.44645	6.69387	0.000758022	0.0188298	-0.0564294	1.876569	1.384848	3.171055	3.353322
IGFBP7	1.62613	3.6656	4.71901	0.00405623	0.0360216	-1.90564	2.379544	3.325522	4.572936	4.384387
ACER2	1.62406	2.55174	4.51151	0.00497256	0.039301	-2.13096	2.246385	1.233030	3.287432	3.440111
COL6A3	1.61312	3.53153	6.78899	0.000706365	0.0184347	0.020719	2.971172	2.478780	4.335530	4.340658
PTX3	1.60964	5.94794	8.50233	0.000224146	0.0139585	1.26076	5.084767	5.201484	6.769660	6.735863
HLA.DOA	1.6096	0.973091	8.60356	0.000210803	0.0138064	1.32611	0.1565517	0.1800332	1.8130141	1.7427660
KLLN	1.60744	1.78112	5.90498	0.00140699	0.0234139	-0.735559	1.3002003	0.6546079	2.5131230	2.6565615
MAP1S	1.60445	4.55399	4.27594	0.00631242	0.0444266	-2.3947	4.285136	3.218387	5.451132	5.261290
GM2A	1.59932	3.10985	8.40324	0.000238174	0.0142326	1.19601	2.280320	2.340058	3.971584	3.847441
ALDH1A3	1.59685	6.12001	6.16141	0.00114297	0.0213307	-0.50682	5.617377	5.025788	6.866462	6.970395
SIPA1	1.59586	4.13857	7.92851	0.00032143	0.0155754	0.874733	3.365976	3.315307	5.062814	4.810197
GREB1	1.59431	1.58028	7.25232	0.000506507	0.0168813	0.383064	0.9657552	0.6005025	2.4468353	2.3080367
CX3CL1	1.59421	1.45097	8.47255	0.000228258	0.0139663	1.24138	0.6957921	0.6119478	2.2210711	2.2750834
TMEM158	1.59411	4.97832	7.82419	0.000344028	0.0157686	0.801585	4.300231	4.062303	5.847442	5.703309
RLBP1	1.58608	2.09014	6.49546	0.000880582	0.0195362	-0.220514	1.036978	1.557220	2.841908	2.924455
KIAA1549L	1.58422	3.21766	3.72007	0.0114508	0.0607099	-3.05104	3.061592	1.789512	3.979041	4.040500
SEC14L4	1.5822	2.7036	8.3483	0.000246393	0.0143221	1.15977	1.962499	1.862488	3.532209	3.457185
PDE2A	1.58157	2.2631	8.35539	0.000245314	0.0143221	1.16446	1.412662	1.531969	3.043822	3.063942
SULT1B1	1.58105	0.914515	7.6697	0.000380997	0.016049	0.691485	0.2479779	0.0000000	1.6232427	1.7868389
TAPBPL	1.57832	3.02982	7.50498	0.000425629	0.0164367	0.571712	2.094463	2.386855	3.892969	3.744984
PTPRU	1.57794	3.32113	7.88292	0.000331086	0.0155754	0.84288	2.414897	2.649427	4.150277	4.069922
IKBKE	1.57711	3.6858	5.49877	0.00198415	0.0267369	-1.1148	2.534166	3.260336	4.468301	4.480415
RFPL4A	1.57708	1.19663	7.57984	0.000404629	0.016367	0.626455	0.3461025	0.4700871	1.8422860	2.1280604
CSF1	1.57537	3.35147	8.04249	0.000298691	0.0153325	0.953588	2.657094	2.470471	4.183495	4.094816
CHST7	1.57439	2.74464	6.39761	0.000949423	0.0200847	-0.303051	1.719995	2.194892	3.656594	3.407067
TTYH3	1.56843	5.42492	4.78596	0.00380298	0.0351078	-1.8343	5.084297	4.197108	6.276225	6.142046
CYP4F2	1.5631	0.982057	7.86552	0.00033486	0.0155754	0.830678	0.2055897	0.1954288	1.8808589	1.6463496
POLR2A	1.56109	5.65093	2.59607	0.0441311	0.138781	-4.51232	5.818872	3.921888	6.491085	6.371860
AREG	1.56064	0.904896	7.38141	0.000463137	0.0168813	0.480213	0.15365738	0.09549289	1.85048544	1.51994963
ITGA5	1.56058	6.59688	6.49196	0.000882941	0.0195362	-0.223446	5.573822	6.059354	7.450310	7.304020
SPTBN5	1.55653	1.72719	6.07007	0.00122982	0.0219958	-0.587375	1.237623	0.660233	2.451177	2.559743
SFRP1	1.554	5.90108	6.97432	0.000617025	0.017595	0.168287	5.311972	4.936189	6.758767	6.597386
PARP10	1.55179	3.90036	5.5003	0.00198152	0.0267296	-1.11333	3.476862	2.772080	4.694428	4.658083
CCDC71L	1.55088	3.83227	7.07013	0.000576032	0.0174144	0.243181	2.898444	3.215220	4.719530	4.495896
TCTEX1D4	1.54164	1.88322	6.43857	0.00091987	0.019904	-0.268366	1.3538065	0.8709947	2.7229831	2.5850984
SPOCD1	1.53732	2.90874	8.23161	0.000264977	0.0149274	1.082	2.108170	2.171996	3.673416	3.681394
APOE	1.53438	2.06642	7.48803	0.000430557	0.0164367	0.55925	1.178620	1.419843	2.911842	2.755386
TAPBP	1.53261	2.72612	5.55597	0.00188828	0.0261899	-1.0601	2.288943	1.630693	3.573127	3.411722
GOLGA7B	1.53076	2.34682	7.36108	0.00046967	0.0168813	0.465022	1.441494	1.721388	3.179641	3.044753
RAB26	1.53034	3.35664	7.30906	0.000486885	0.0168813	0.425964	2.431505	2.751429	4.135424	4.108185
RARRES3	1.53009	1.87953	4.25774	0.00643198	0.0447509	-2.41543	0.6185302	1.6104379	2.7684879	2.5206566
TREM2	1.52613	0.842561	7.80984	0.00034728	0.0158133	0.791447	0.1589906	0.0000000	1.6676433	1.5436114
PRR13	1.52531	6.41202	7.90506	0.000326354	0.0155754	0.858375	5.596328	5.702404	7.243346	7.105998
FAM132B	1.52379	2.32589	7.66657	0.000381794	0.016049	0.689228	1.490934	1.637049	3.179822	2.995747
SOCS1	1.52071	0.948897	7.44779	0.000442529	0.0166443	0.529547	0.1829338	0.1941528	1.8500050	1.5684966
AKR1B10	1.51506	0.90306	7.3296	0.000480002	0.0168813	0.441416	0.07212563	0.21893609	1.52899921	1.79217978
CLDN4	1.51473	3.98406	7.29472	0.000491759	0.0168813	0.415151	3.158978	3.294412	4.879987	4.602870
TP53I3	1.51372	6.13435	4.41679	0.00546798	0.0410115	-2.23598	4.906477	5.848516	6.976015	6.806409
HAPLN3	1.50966	2.6026	5.60613	0.00180858	0.0256693	-1.01248	1.524278	2.171259	3.375095	3.339752
TNFRSF25	1.50963	4.23095	5.41055	0.00214326	0.0275209	-1.20002	3.822098	3.130180	4.985254	4.986277
PLAU	1.50815	1.03992	8.05824	0.0002957	0.0153325	0.964394	0.3148154	0.2568637	1.8186129	1.7693758
HNRNPCL2	1.5072	1.3798	6.56874	0.000832812	0.0192884	-0.159408	0.4388109	0.8135902	2.0109925	2.2558073
EXOSC6	1.50651	5.56831	6.99452	0.00060811	0.0175939	0.184149	4.943304	4.686815	6.449531	6.193606
ARC	1.50054	3.97329	7.56885	0.000407635	0.016367	0.618449	3.162095	3.283933	4.821247	4.625870
PRKCDBP	1.50035	5.57428	3.22238	0.0203225	0.0856049	-3.67833	4.124524	5.523679	6.442435	6.206468
LRG1	1.49915	0.952738	6.48688	0.000886383	0.0195432	-0.22771	0.03294808	0.37337491	1.85473059	1.54989845
PRAMEF11	1.49673	0.748365	7.86607	0.000334739	0.0155754	0.831066	0.000000	0.000000	1.565266	1.428195
SOD2	1.49561	4.15508	6.62925	0.000795624	0.0189822	-0.109397	3.593524	3.221031	4.800016	5.005751
ZMIZ1	1.49487	4.49783	2.93147	0.0289277	0.106239	-4.06056	4.538480	2.962307	5.286211	5.204319
PMEL	1.49364	1.00022	7.11082	0.000559588	0.0172725	0.274706	0.2460213	0.2607730	1.9098317	1.5842413
SERPINA3	1.49303	8.16308	3.85011	0.00991978	0.0562407	-2.89322	6.851608	7.981526	8.937620	8.881572
HLA.DQB1	1.49268	2.64056	5.54936	0.00189909	0.026198	-1.0664	1.577815	2.210629	3.453180	3.320621
YPEL3	1.49186	1.6286	5.33012	0.00230126	0.0280064	-1.27863	1.1890447	0.5762933	2.5393859	2.2096797
CLIP3	1.49162	2.75232	3.62996	0.0126677	0.064207	-3.16191	2.613588	1.399428	3.547449	3.448813
KRTAP2.3	1.4906	1.80444	6.70333	0.000752693	0.0188298	-0.0487138	1.1729656	0.9453193	2.7179902	2.3815006
OTUB2	1.48589	2.50966	6.35322	0.0009827	0.0203452	-0.340852	1.530570	2.002860	3.251980	3.253223
MAGED1	1.48248	4.86377	5.44189	0.00208511	0.0272769	-1.16962	4.448295	3.796772	5.664385	5.545642
ANPEP	1.48242	5.52108	4.85338	0.00356613	0.0341217	-1.76315	5.178799	4.380932	6.318734	6.205836
OAS2	1.47828	1.37005	7.38924	0.000460649	0.0168813	0.486052	0.7074392	0.5543677	2.0123218	2.2060542
FEZ1	1.47559	4.19567	7.58685	0.000402725	0.0163642	0.631555	3.552705	3.363053	4.947053	4.919881
PROSER2	1.4733	3.27294	7.62599	0.000392286	0.0161824	0.659943	2.586988	2.485593	4.081812	3.937364
SERPINA5	1.47155	3.61627	5.06356	0.00292949	0.0311408	-1.54556	2.513144	3.247843	4.406708	4.297375
FRMD8	1.47022	5.41021	7.41673	0.000452037	0.0168813	0.50651	4.753088	4.597105	6.229856	6.060777
ATG16L2	1.46911	2.02359	7.6008	0.000398968	0.0163003	0.641687	1.377765	1.200296	2.761009	2.755274
SVIL	1.46725	2.8165	3.8744	0.0096601	0.0553465	-2.86402	2.624625	1.541135	3.465001	3.635254
KIFC2	1.46722	2.98498	5.54002	0.00191446	0.0262966	-1.07531	2.564443	1.938291	3.738163	3.699007
CCNA1	1.4665	3.18366	5.78259	0.00155752	0.0241878	-0.847597	2.166650	2.734164	3.959342	3.874473
SDC4	1.45877	8.04067	6.21326	0.00109684	0.0211786	-0.46153	7.079710	7.542866	8.827556	8.712559
SRPX	1.45386	3.92238	6.52808	0.000858937	0.0193952	-0.193242	3.387948	3.002952	4.717334	4.581294
ABCB9	1.45304	5.03672	5.88225	0.00143363	0.0234849	-0.756223	4.041521	4.578885	5.795260	5.731222
PTPRS	1.44911	3.92651	4.93756	0.00329376	0.0325507	-1.67523	3.577314	2.826603	4.691961	4.610169
IL27RA	1.4476	4.30076	5.04137	0.00299013	0.0314183	-1.56823	3.226884	3.927047	5.123752	4.925376
PAX8	1.44726	1.24231	6.18095	0.00112532	0.0211786	-0.489709	0.7555562	0.2817947	1.9663810	1.9654919
NFKBIE	1.44418	4.49867	4.37018	0.00573229	0.0421265	-2.28817	3.322853	4.230308	5.240811	5.200714
MMP10	1.44291	0.926836	7.24373	0.000509556	0.0168813	0.376545	0.2743317	0.1364321	1.5506527	1.7459262
TLCD2	1.43832	2.72067	4.68073	0.00420965	0.0364722	-1.94671	2.408235	1.594781	3.445154	3.434503
MCEMP1	1.43543	1.0125	7.63801	0.000389143	0.0161047	0.668634	0.2483244	0.3412485	1.7397360	1.7207008
MMP2	1.43334	6.4968	6.28505	0.00103648	0.0206778	-0.399348	5.573584	5.986672	7.288802	7.138129
PLAC1	1.43292	0.917991	6.85506	0.00067289	0.0180019	0.0737396	0.1580728	0.2449840	1.4811960	1.7877102
ACTA2	1.43251	4.13729	7.54514	0.000414207	0.016367	0.601149	3.479371	3.362694	4.824301	4.882790
TMEM265	1.43138	3.90007	7.13927	0.000548411	0.0171889	0.296658	3.308366	3.060381	4.597102	4.634414
MARVELD1	1.42819	4.76987	5.7055	0.00166189	0.0249147	-0.919136	4.323787	3.787758	5.560844	5.407078
HSPA2	1.42593	1.55884	6.52025	0.000864073	0.0193952	-0.199774	0.659545	1.032194	2.226304	2.317303
FAXDC2	1.42141	2.06683	7.56157	0.000409639	0.016367	0.613146	1.324273	1.387970	2.813335	2.741727
CEMIP	1.42113	3.52194	5.62909	0.00177341	0.0255135	-0.990808	3.091110	2.531646	4.282196	4.182816
RELB	1.42077	5.5756	4.88914	0.00344738	0.0333473	-1.72567	4.498832	5.231602	6.346537	6.225436
PCDHB6	1.42016	3.76494	5.35049	0.00226001	0.027843	-1.25864	3.355588	2.754134	4.568937	4.381098
BCL2A1	1.41727	1.07822	6.55895	0.000839017	0.0193322	-0.167538	0.2840117	0.4551673	1.6245973	1.9491157
GAA	1.41481	5.53484	7.40431	0.000455906	0.0168813	0.497275	4.864283	4.790596	6.306938	6.177558
PRRT2	1.4146	2.02032	4.66763	0.00426367	0.0366667	-1.96082	1.7084678	0.9175805	2.7719751	2.6832673
ATP6V0A4	1.41112	3.42067	5.53214	0.00192755	0.0263936	-1.08283	2.428806	3.001413	4.175350	4.077101
PLEC	1.40999	7.48565	2.91872	0.0293875	0.107104	-4.07755	7.520354	6.040957	8.235068	8.146227
MSC	1.40751	2.8424	5.69251	0.00168027	0.0251097	-0.931269	1.870962	2.406323	3.589576	3.502738
AMPD3	1.4074	1.61939	7.27111	0.00049991	0.0168813	0.397302	1.0055771	0.8258045	2.3330379	2.3131529
ADAT3	1.40466	2.71248	6.62604	0.000797545	0.0189926	-0.112036	1.957018	2.063269	3.576037	3.253579
SLC14A1	1.40458	4.09526	7.55225	0.000412223	0.016367	0.606345	3.377739	3.408190	4.799334	4.795759
HIST1H2BD	1.40306	3.65031	6.19995	0.00110846	0.0211786	-0.47312	2.739056	3.158505	4.305456	4.398223
COL16A1	1.39911	1.85395	5.55338	0.00189251	0.0261899	-1.06257	1.4308818	0.8779157	2.4939446	2.6130737
APOL1	1.39696	1.16962	7.30161	0.00048941	0.0168813	0.420349	0.5160815	0.4262040	1.9295783	1.8066273
NFKB1	1.39479	5.96333	7.34657	0.000474401	0.0168813	0.45415	5.229081	5.302793	6.714557	6.606901
ST3GAL5	1.39338	2.7623	5.88315	0.00143256	0.0234849	-0.755402	2.309068	1.822160	3.477608	3.440381
NINJ1	1.39158	3.59285	5.92952	0.00137887	0.0232545	-0.713316	2.659436	3.134689	4.270114	4.307176
SIPA1L2	1.39144	1.79591	5.17934	0.00263506	0.0296119	-1.4284	1.4216674	0.7787165	2.4657703	2.5174886
ABCC2	1.39086	2.47925	4.25877	0.00642515	0.0447509	-2.41425	2.206192	1.361446	3.030320	3.319029
ARHGEF37	1.38808	3.07532	5.76335	0.00158284	0.0242411	-0.865375	2.126693	2.635863	3.778550	3.760174
S100A10	1.38248	7.60309	3.70925	0.0115897	0.061192	-3.06429	7.439936	6.383771	8.391432	8.197228
KRT6C	1.3818	0.716291	7.40867	0.00045454	0.0168813	0.500525	0.05078323	0.00000000	1.41878731	1.39559372
TPBG	1.37997	4.73686	5.77908	0.00156211	0.0241878	-0.850837	4.291177	3.802583	5.476728	5.376964
TBX3	1.37932	6.17097	6.54348	0.000848932	0.0193952	-0.180406	5.632699	5.329914	6.927693	6.793556
MXRA8	1.37903	2.63775	4.46085	0.00523083	0.0402963	-2.18696	2.342108	1.554357	3.211183	3.443337
JARID2	1.37495	3.71198	4.98354	0.00315512	0.0319513	-1.62765	3.362194	2.686826	4.369781	4.429132
CDCP1	1.37365	4.69041	5.39586	0.00217117	0.0275922	-1.21431	4.290499	3.716676	5.414133	5.340351
KCNS3	1.37275	4.10028	5.29768	0.00236875	0.0282308	-1.31059	3.129237	3.698570	4.882013	4.691292
COL7A1	1.37265	2.68624	3.18108	0.0213504	0.0884733	-3.73196	2.644457	1.355376	3.313976	3.431168
LSAMP	1.37136	1.20822	6.92595	0.000639009	0.0177637	0.130112	0.6007129	0.4443649	1.8110140	1.9767881
TSPAN1	1.36957	1.96309	4.8007	0.00374969	0.0349751	-1.81868	0.9295888	1.6270257	2.7364834	2.5592632
BCL3	1.3655	4.03568	4.20999	0.00675817	0.0456301	-2.47007	3.787991	2.917877	4.795493	4.641373
FZD1	1.36492	3.15107	6.97059	0.00061869	0.017595	0.165348	2.516293	2.420923	3.924761	3.742294
FUT11	1.36461	3.01463	5.03596	0.00300514	0.031474	-1.57377	2.643747	2.020910	3.799371	3.594502
PCDHB5	1.36336	2.55662	6.94319	0.00063107	0.0177155	0.143747	1.921621	1.828265	3.333238	3.143371
QPRT	1.36223	1.29645	6.91164	0.000645687	0.0177637	0.118773	0.5352295	0.6954479	2.0521927	1.9029380
NNAT	1.36089	2.1411	4.30217	0.00614451	0.0438761	-2.36491	1.867787	1.053521	2.697985	2.945110
CDC42EP5	1.36031	1.71995	5.06669	0.00292104	0.0311124	-1.54237	0.7177785	1.3618084	2.3918176	2.4083881
IRGQ	1.35976	2.66041	4.71406	0.00407571	0.0361089	-1.91094	2.345552	1.615502	3.375280	3.305293
IRF7	1.35917	2.16382	6.53889	0.000851899	0.0193952	-0.184228	1.505785	1.462674	2.996907	2.689902
CDKN1A	1.35834	7.30556	4.50944	0.00498283	0.0393336	-2.13324	6.238335	7.014455	8.053111	7.916356
IL4R	1.35721	3.92725	6.17862	0.00112741	0.0211786	-0.49175	3.057492	3.439796	4.643540	4.568162
TUBB4A	1.35706	1.83944	5.55881	0.00188367	0.0261899	-1.0574	1.4198611	0.9019512	2.5652312	2.4706998
CST3	1.35673	6.33986	5.81581	0.0015149	0.0239241	-0.816999	5.449743	5.873248	7.119004	6.917446
USP43	1.35415	3.72801	7.15215	0.00054344	0.017117	0.306564	3.088498	3.013369	4.453017	4.357142
ZSWIM1	1.35325	3.73841	2.79246	0.0343965	0.118657	-4.24659	3.803143	2.320419	4.474835	4.355227
LPAR2	1.35149	2.66702	4.69584	0.00414829	0.0363345	-1.93047	2.350639	1.631904	3.277179	3.408344
KANK3	1.34994	1.05819	7.15536	0.00054221	0.017117	0.309028	0.3389362	0.4274893	1.7007951	1.7655201
P4HA3	1.34901	0.905942	6.60474	0.000810449	0.0191572	-0.129605	0.1230376	0.3398348	1.4900702	1.6708272
VANGL2	1.34647	2.70127	5.35613	0.00224874	0.0277844	-1.25311	2.308959	1.747114	3.392080	3.356933
HIP1	1.34618	3.79959	5.67703	0.00170247	0.0251975	-0.945756	3.371425	2.881572	4.472032	4.473324
EVC	1.34455	3.49563	4.55103	0.00478114	0.0387485	-2.08754	3.200444	2.446270	4.227437	4.108376
MMP17	1.34319	2.76102	7.04529	0.000586348	0.017558	0.223852	2.110960	2.067893	3.500635	3.364595
S100B	1.34298	4.56149	6.41287	0.000938288	0.0200154	-0.290109	3.729312	4.050681	5.235280	5.230677
ASTN2	1.33926	1.50001	7.00716	0.000602605	0.0175939	0.19406	0.7561166	0.9046490	2.1784863	2.1608065
NEFL	1.33777	3.34489	6.70513	0.000751683	0.0188298	-0.0472465	2.587486	2.764533	4.096259	3.931297
MAGEB6	1.33465	0.841956	6.88964	0.00065611	0.0178512	0.101301	0.2250243	0.1242369	1.4330773	1.5854874
APOBEC3D	1.33109	2.31769	7.05313	0.000583068	0.0175442	0.229961	1.706320	1.597972	2.994895	2.971570
PFKFB4	1.33101	5.02226	6.67311	0.000769874	0.0188298	-0.0733989	4.250268	4.463239	5.744669	5.630849
RAP2B	1.3273	3.01549	6.66662	0.000773622	0.0188326	-0.0787125	2.467394	2.236278	3.707873	3.650396
PBXIP1	1.32626	2.0163	6.02468	0.00127582	0.0223803	-0.62779	1.157248	1.549087	2.667068	2.691779
RFPL4AL1	1.32273	0.694866	7.03489	0.000590732	0.017558	0.21574	0.06699852	0.00000000	1.32126664	1.39119793
SOX10	1.32165	8.29864	6.84084	0.00067994	0.018098	0.0623609	7.627632	7.648005	9.047159	8.871783
ST8SIA5	1.32155	1.55861	6.96648	0.00062053	0.017595	0.162112	0.8475708	0.9480919	2.1797928	2.2589684
DQX1	1.32019	1.02796	6.60773	0.000808623	0.0191494	-0.127135	0.4739837	0.2617464	1.6273264	1.7487935
XYLT1	1.31835	1.31741	6.82887	0.000685936	0.0181	0.0527741	0.7430918	0.5733764	1.9975006	1.9556679
TNIP1	1.31783	5.25409	5.52344	0.00194214	0.0264777	-1.09116	4.355659	4.834691	5.980398	5.845617
PIDD1	1.3178	4.06964	5.94823	0.00135787	0.0230673	-0.696417	3.609211	3.212257	4.757886	4.699190
GPR25	1.31573	0.657866	7.08319	0.000570694	0.0172939	0.253318	0.000000	0.000000	1.316891	1.314573
ULK1	1.31542	3.60469	3.57361	0.0135023	0.0669134	-3.23187	3.471369	2.422589	4.324627	4.200177
CD22	1.31344	4.58597	7.02627	0.000594392	0.0175823	0.20901	3.901660	3.956846	5.263976	5.221412
RAB3A	1.31238	2.42039	6.50583	0.000873631	0.0194833	-0.211829	1.767830	1.760578	3.207244	2.945913
COL9A3	1.31081	4.09558	5.84372	0.00148012	0.0237103	-0.791396	3.626477	3.253876	4.845595	4.656377
SH2B3	1.31062	4.28613	5.25606	0.00245871	0.0286919	-1.3518	3.891878	3.369758	5.032326	4.850549
NEDD9	1.30872	2.23468	6.4763	0.000893594	0.0195494	-0.236591	1.681518	1.479128	2.974152	2.803939
HLA.DMB	1.30634	1.54247	5.20039	0.00258528	0.029361	-1.4073	0.6083073	1.1702927	2.1928784	2.1983950
S100A4	1.30484	8.51275	2.97627	0.0273741	0.10261	-4.00104	7.201443	8.519214	9.201660	9.128683
TENM4	1.30301	0.785512	6.82782	0.000686466	0.0181	0.0519311	0.16898329	0.09902623	1.50077885	1.37325847
NECAB2	1.30123	1.2874	6.18861	0.00111849	0.0211786	-0.483021	0.7540434	0.5195328	2.0522590	1.8237720
MST1R	1.29802	1.19835	6.87759	0.000661902	0.0178854	0.0917098	0.5916232	0.5070606	1.8833056	1.8114118
HMOX1	1.2977	3.53125	4.77167	0.0038555	0.0352424	-1.84948	2.555301	3.209493	4.224393	4.135805
CHST11	1.29727	2.48213	6.20238	0.00110633	0.0211786	-0.471006	1.679937	1.987062	3.174797	3.086735
AZGP1	1.29419	3.85653	4.79994	0.00375241	0.0349751	-1.81949	2.885677	3.533202	4.528957	4.478303
CAPS	1.29306	6.22376	3.57342	0.0135051	0.0669134	-3.23211	5.072663	6.081796	6.978431	6.762149
PIR	1.29255	2.46263	5.30335	0.0023568	0.0281914	-1.30499	1.606517	2.026186	2.951687	3.266124
ADAM23	1.2925	1.69619	5.89017	0.00142427	0.0234849	-0.749011	1.2407286	0.8591611	2.3782630	2.3066193
ORAI3	1.29237	5.06208	6.30282	0.00102213	0.0205196	-0.384041	4.296207	4.535575	5.788861	5.627668
FOXF1	1.2903	2.15851	5.49061	0.00199829	0.0267955	-1.12264	1.741596	1.285129	2.875272	2.732060
APOBEC3B	1.28849	4.12305	4.26864	0.00636005	0.0445995	-2.403	3.093466	3.864142	4.855754	4.678824
GPR84	1.28796	0.704079	6.70973	0.00074911	0.0188298	-0.0434975	0.03877860	0.08142061	1.42559965	1.27051710
UCN2	1.28782	5.41922	6.35243	0.000983301	0.0203452	-0.341523	4.673985	4.876630	6.152249	5.974001
CNFN	1.28774	2.23904	5.90412	0.00140798	0.0234139	-0.736336	1.697763	1.492581	2.723045	3.042774
LCP1	1.28742	1.4406	6.77371	0.00071438	0.0184658	0.00839175	0.7589157	0.8348689	2.0292809	2.1393383
ACP5	1.28685	2.62357	5.44136	0.00208608	0.0272769	-1.17014	1.737052	2.223239	3.258884	3.275099
ZNF865	1.28592	3.72735	3.50343	0.014629	0.0700396	-3.31966	3.597194	2.571593	4.487638	4.252990
PLXNB3	1.28563	4.37912	3.09233	0.0237593	0.0942323	-3.84792	4.353795	3.118821	5.048521	4.995351
TRIB1	1.28371	4.4564	6.7265	0.000739825	0.0187716	-0.0298599	3.861863	3.767228	5.153524	5.042984
CEND1	1.28111	1.76847	6.48122	0.000890235	0.0195494	-0.232463	1.035002	1.220838	2.345960	2.472098
DUSP10	1.27697	5.14217	6.0345	0.0012657	0.0222638	-0.619023	4.672068	4.335309	5.785193	5.776119
CDK18	1.27451	3.15198	4.37633	0.00569657	0.0419967	-2.28126	2.878967	2.150488	3.868294	3.710191
GAS7	1.27394	4.47948	6.77756	0.000712353	0.0184658	0.0114966	3.861159	3.823865	5.160421	5.072473
S100A3	1.27353	4.31384	3.21506	0.0205006	0.0861673	-3.68782	3.124655	4.229484	5.131786	4.769423
TGFBI	1.27251	6.01849	3.8787	0.00961499	0.0551503	-2.85887	4.937410	5.827062	6.718481	6.591014
MYO1A	1.27045	0.799409	6.83926	0.000680727	0.018098	0.0610967	0.1666508	0.1617137	1.4345682	1.4347013
TSPYL2	1.26934	3.92143	6.80318	0.000699016	0.0182977	0.0321443	3.305458	3.268064	4.578489	4.533714
MYBL2	1.26904	4.34146	6.47931	0.000891533	0.0195494	-0.23406	3.611672	3.802207	5.015653	4.936301
FAM222B	1.26797	3.94176	2.64406	0.041504	0.133288	-4.44711	4.040180	2.575374	4.633369	4.518120
TNRC18	1.2661	4.8132	2.723	0.0375434	0.125256	-4.34022	4.884978	3.475318	5.516271	5.376228
SPATA25	1.26555	2.77579	4.24197	0.0065377	0.0450453	-2.43344	2.506341	1.779681	3.544531	3.272592
RNF125	1.2648	2.69718	4.44026	0.00534016	0.0406877	-2.20983	2.423625	1.705936	3.329655	3.329507
GCHFR	1.26207	3.31589	4.14751	0.00721373	0.047417	-2.54209	2.328993	3.040710	4.130698	3.763151
RIPK4	1.26073	3.61549	4.71479	0.00407283	0.0361089	-1.91015	2.678140	3.292102	4.334867	4.156833
S1PR5	1.26007	1.74214	5.47721	0.00202176	0.0269034	-1.13553	0.9016419	1.3225692	2.4532494	2.2910997
LTBP3	1.25889	6.71979	3.89857	0.00940931	0.0546441	-2.83506	6.517665	5.663035	7.449473	7.249007
MYO1E	1.25775	4.19819	6.21106	0.00109875	0.0211786	-0.463443	3.703314	3.435325	4.828102	4.826034
PADI4	1.25726	0.655852	6.38405	0.000959448	0.02018	-0.314574	0.00000000	0.05444594	1.17923076	1.38973324
ARHGAP31	1.25549	2.47685	6.70726	0.000750494	0.0188298	-0.0455156	1.810765	1.887453	3.106236	3.102955
KRBA2	1.25518	0.819768	6.49545	0.000880592	0.0195362	-0.220526	0.2539053	0.1304514	1.5107992	1.3839157
A2M	1.25465	1.7903	6.14024	0.00116245	0.0214818	-0.525402	1.291932	1.034018	2.359462	2.475793
NFE2L3	1.24631	3.57123	4.91408	0.00336725	0.0329208	-1.69965	3.205424	2.690732	4.067458	4.321318
IFI35	1.24592	5.44437	3.23788	0.019951	0.084626	-3.65827	4.263664	5.379155	6.117297	6.017359
KCNK3	1.24506	0.914751	6.5306	0.000857291	0.0193952	-0.19114	0.2209352	0.3635052	1.5402651	1.5342999
C1orf106	1.24413	2.04465	6.17154	0.00113378	0.021228	-0.49794	1.484344	1.360836	2.781290	2.552148
ZNF385A	1.24389	3.62353	4.44582	0.00531041	0.0405914	-2.20365	3.342870	2.660291	4.311828	4.179114
MYPOP	1.24199	3.33955	3.81313	0.0103302	0.0576869	-2.93783	3.158360	2.278756	4.025661	3.895434
PPP1R14C	1.23956	1.61803	6.09433	0.00120604	0.0217404	-0.565887	0.9199661	1.0765411	2.3510786	2.1245483
PCDHB16	1.23895	2.60142	4.24327	0.00652887	0.0450087	-2.43194	2.354399	1.609486	3.258395	3.183398
HHEX	1.2385	3.27647	5.80048	0.00153439	0.0240999	-0.831098	2.821893	2.492552	3.954833	3.836619
GBP2	1.23813	2.14005	6.34826	0.000986499	0.0203452	-0.345086	1.534958	1.507018	2.661322	2.856905
FBXO2	1.23758	2.02505	4.49843	0.00503784	0.0395475	-2.14538	1.070591	1.741939	2.676099	2.611583
HLA.DMA	1.23754	2.2786	5.68493	0.0016911	0.0251975	-0.938357	1.482719	1.836941	2.962232	2.832507
NCAM1	1.23709	1.8634	6.21889	0.00109195	0.0211574	-0.456628	1.358724	1.130987	2.449938	2.513946
CYTH4	1.23701	1.10374	6.39549	0.000950984	0.0200847	-0.304853	0.3978423	0.5726238	1.7024999	1.7419921
MATN4	1.23648	1.46933	6.48734	0.000886068	0.0195432	-0.22732	0.7801323	0.9220460	2.0869683	2.0881615
FAM102A	1.23572	4.11419	5.84265	0.00148143	0.0237103	-0.792375	3.661905	3.330754	4.760795	4.703299
HIST1H3E	1.23381	2.80388	6.24843	0.00106677	0.0208851	-0.430993	2.296323	2.077621	3.441493	3.400066
ASPHD1	1.2322	4.05087	5.21503	0.00255127	0.0292263	-1.39266	3.192845	3.676703	4.685665	4.648280
TNFSF14	1.23147	0.635934	6.5503	0.000844545	0.0193952	-0.174731	0.04040108	0.00000000	1.20793251	1.29540171
MARCKSL1	1.23008	7.01534	6.3353	0.000996516	0.0203452	-0.356176	6.379409	6.421203	7.721957	7.538812
PTGS1	1.22994	1.05597	6.36777	0.000971647	0.0202699	-0.328439	0.4131302	0.4688749	1.7543892	1.5874960
RNF213	1.22897	3.44091	3.45149	0.0155309	0.0723793	-3.3851	3.331180	2.321669	4.061403	4.049391
CYP1B1	1.2283	1.11596	5.43718	0.00209374	0.0273212	-1.17419	0.6181692	0.3854469	1.5509304	1.9092787
KLF14	1.22681	1.80137	5.33962	0.00228192	0.0279513	-1.2693	1.370400	1.005532	2.545948	2.283613
GRHL3	1.22535	1.14875	6.58724	0.000821233	0.019195	-0.144077	0.5525740	0.5195804	1.7611758	1.7616687
P4HA2	1.22485	4.19663	5.40828	0.00214756	0.0275209	-1.20223	3.368910	3.799490	4.806666	4.811437
C15orf39	1.22483	3.32991	3.80516	0.0104213	0.0579927	-2.94748	3.153569	2.281433	3.968109	3.916543
VASN	1.22412	1.34203	6.46109	0.000904084	0.0197294	-0.249386	0.7052093	0.7547384	2.0108972	1.8972810
CPVL	1.22031	2.06411	4.7867	0.00380031	0.0351078	-1.83352	1.163804	1.744097	2.676328	2.672196
TREH	1.2201	1.07849	6.40336	0.00094521	0.0200847	-0.298172	0.5268126	0.4100634	1.6489560	1.7281117
ADAMTSL4	1.21852	2.14685	4.52655	0.00489871	0.0391183	-2.11441	1.834728	1.240450	2.884673	2.627543
LAMA4	1.21759	4.10803	3.33446	0.0177992	0.078924	-3.53396	3.977620	3.020856	4.506937	4.926725
HLA.DRA	1.21728	5.74633	3.23399	0.0200435	0.0847889	-3.6633	4.595321	5.680064	6.397023	6.312915
MMP15	1.21605	1.84863	6.39914	0.000948301	0.0200847	-0.301753	1.278318	1.202893	2.511613	2.401704
TTLL6	1.21306	0.83281	5.75029	0.0016003	0.0243917	-0.877477	0.3505503	0.1020121	1.3290440	1.5496340
NTF4	1.21249	0.933712	6.2164	0.00109411	0.0211672	-0.458796	0.3181669	0.3367636	1.6383790	1.4415371
UBE2R2	1.21239	5.62877	3.08687	0.0239173	0.0945452	-3.8551	5.592311	4.452841	6.312894	6.157034
VNN1	1.2118	0.712776	6.31365	0.00101351	0.0205196	-0.374735	0.11838124	0.09537292	1.23922250	1.39812674
CD68	1.21055	7.83984	3.20181	0.0208274	0.0869258	-3.70501	6.691235	7.777888	8.510188	8.380035
HEG1	1.21	3.29409	2.26275	0.0680943	0.183479	-4.96776	3.522015	1.856170	3.922771	3.875416
KIF3C	1.20978	4.24648	6.19248	0.00111506	0.0211786	-0.479642	3.556120	3.727071	4.904347	4.798397
APOBEC3C	1.20967	6.52536	4.48454	0.00510822	0.0398559	-2.16073	5.602911	6.238134	7.199189	7.061196
ELMSAN1	1.20623	3.2665	3.97735	0.00864168	0.0522752	-2.7413	3.061266	2.265513	3.889254	3.849975
HOXB9	1.20483	5.82356	5.07558	0.00289722	0.0310559	-1.53331	5.455218	4.987068	6.500325	6.351631
MAGEB2	1.20205	2.2292	4.20004	0.00682847	0.0458867	-2.48149	1.279941	1.976411	2.928362	2.732082
BCORL1	1.19938	2.05147	3.50071	0.0146748	0.0701193	-3.32307	1.920147	0.983412	2.748534	2.553794
HRCT1	1.19894	1.65947	4.33407	0.00594707	0.043049	-2.32882	0.7592259	1.3607654	2.4188425	2.0990363
AMT	1.19879	2.11027	3.44682	0.015615	0.072586	-3.391	1.999122	1.022634	2.690989	2.728342
LTBP4	1.19866	4.00687	3.93061	0.0090882	0.0536298	-2.79682	3.807434	3.007653	4.646253	4.566158
TTPAL	1.19864	3.78639	3.69151	0.0118217	0.0618053	-3.08605	3.625647	2.748494	4.444888	4.326542
KRT8	1.19753	6.48166	2.91367	0.0295717	0.107531	-4.08428	5.274802	6.490990	7.117694	7.043153
SERPINE2	1.19636	7.8495	6.34082	0.000992233	0.0203452	-0.351448	7.197175	7.305468	8.438198	8.457162
TEP1	1.1961	2.88799	4.22511	0.00665287	0.0453804	-2.45272	2.644857	1.935034	3.478711	3.493373
CCR10	1.19514	1.83778	5.36907	0.00222313	0.0276958	-1.24045	1.130515	1.349911	2.607141	2.263568
DLGAP4	1.19295	4.29218	2.81521	0.0334292	0.116356	-4.21602	4.324621	3.066796	4.959519	4.817798
RHBDL2	1.19274	1.23597	5.93272	0.00137525	0.023232	-0.710421	0.5156703	0.7635272	1.8011408	1.8635319
PML	1.19093	3.64914	3.98687	0.00855382	0.0521148	-2.73004	3.436385	2.670961	4.312754	4.176461
TRIM49	1.188	0.646734	5.46068	0.00205112	0.0270969	-1.15147	0.1054714	0.0000000	1.0600819	1.4213833
MAGEC1	1.18516	1.19216	6.37163	0.000968735	0.0202444	-0.325144	0.6073801	0.5917720	1.7706406	1.7988326
MFGE8	1.18475	4.47697	5.4589	0.00205432	0.027101	-1.15319	3.706808	4.062383	5.125727	5.012965
FAM110A	1.18261	2.47977	5.06809	0.00291728	0.0311124	-1.54094	1.688199	2.088736	3.193427	2.948736
GALNT2	1.17985	6.54631	5.7518	0.00159828	0.0243899	-0.876082	5.834433	6.078334	7.213939	7.058521
PVRL1	1.17905	2.83759	4.2983	0.00616897	0.0439492	-2.3693	2.572448	1.923673	3.512354	3.341869
CD79B	1.17904	0.849183	5.71236	0.00165229	0.0248595	-0.912742	0.3326327	0.1866957	1.3081856	1.5692166
FAM210B	1.17831	5.74822	6.27314	0.00104622	0.0206785	-0.409619	5.205192	5.112944	6.333016	6.341733
CACNB3	1.17812	3.58993	5.67928	0.00169921	0.0251975	-0.943641	2.881886	3.119862	4.275886	4.082094
NBPF3	1.17798	2.04122	5.97477	0.00132872	0.0229217	-0.672512	1.385869	1.518592	2.717715	2.542710
HLA.B	1.17717	2.69747	3.82244	0.0102251	0.0573503	-2.92658	1.732552	2.485228	3.444089	3.128024
TNFRSF1B	1.17671	2.25161	6.05734	0.00124253	0.0221301	-0.598684	1.579397	1.747114	2.883518	2.796418
SSUH2	1.17398	3.05785	5.16245	0.00267582	0.0297752	-1.44537	2.687205	2.254514	3.618073	3.671608
NEURL3	1.1739	0.704483	5.78392	0.00155579	0.0241878	-0.846366	0.09789136	0.13717204	1.15696132	1.42590645
NICN1	1.17339	3.12252	3.58954	0.0132602	0.0660582	-3.21205	2.982074	2.089569	3.734685	3.683748
RERE	1.17243	3.8998	1.89925	0.110481	0.249484	-5.46174	4.288773	2.338391	4.563354	4.408676
APOBEC3F	1.17144	2.27499	5.38435	0.00219331	0.0276608	-1.22553	1.869887	1.508649	2.913648	2.807764
GNS	1.17052	4.795	3.19916	0.0208933	0.0870924	-3.70845	4.733042	3.686441	5.403408	5.357124
EFNA4	1.17035	2.77282	6.15311	0.00115056	0.0214169	-0.514099	2.146566	2.228729	3.412154	3.303834
PHLDA2	1.16976	7.42361	5.28699	0.0023915	0.028346	-1.32115	6.676118	7.001347	8.124483	7.892507
SEZ6L2	1.16711	4.43362	5.71469	0.00164903	0.0248595	-0.910568	3.988876	3.711257	5.042248	4.992104
JAG1	1.16647	4.49798	5.56477	0.00187401	0.0261899	-1.05173	4.063378	3.766116	5.144161	5.018274
PTGS2	1.1659	0.735554	6.20217	0.00110652	0.0211786	-0.471189	0.1969446	0.1082612	1.3001952	1.3368154
CNTNAP1	1.16501	3.83506	6.18012	0.00112607	0.0211786	-0.490439	3.296049	3.209063	4.448503	4.386630
RBM47	1.16399	3.20036	5.75634	0.00159218	0.0243377	-0.871867	2.749586	2.487154	3.762071	3.802642
NIPAL4	1.16302	1.61763	6.04692	0.00125304	0.0221938	-0.60796	1.0808532	0.9913942	2.2689153	2.1293687
ITGB3	1.1613	6.0633	6.02517	0.00127531	0.0223803	-0.627347	5.563945	5.401346	6.670294	6.617597
LRP1	1.16032	4.77461	3.34346	0.0176124	0.0784942	-3.52246	4.678520	3.710379	5.409191	5.300348
CTNNA1	1.16013	7.26363	4.46745	0.00519636	0.0402246	-2.17964	6.985095	6.382038	7.847469	7.839919
FAM83D	1.15952	4.1852	5.74452	0.00160809	0.0244812	-0.882831	3.701871	3.509004	4.853990	4.675926
OPRD1	1.15914	1.82208	5.48901	0.00200107	0.0267955	-1.12417	1.325252	1.159766	2.546612	2.256678
NLGN2	1.15694	3.7174	3.51441	0.014446	0.0695542	-3.30588	3.588838	2.689033	4.335308	4.256439
GPR15	1.15603	1.33134	4.97829	0.00317059	0.0319845	-1.63306	0.8649970	0.6416507	1.7064982	2.1122155
ZP1	1.15409	2.03519	5.48704	0.00200451	0.0268135	-1.12607	1.294198	1.622100	2.611821	2.612659
EGR3	1.15329	3.84575	3.18691	0.0212016	0.0879803	-3.72436	3.781123	2.757086	4.487000	4.357786
CHAC1	1.153	6.55322	4.27261	0.00633413	0.0445304	-2.39849	5.666871	6.286575	7.228727	7.030718
SLC5A3	1.15295	3.06959	4.14124	0.00726132	0.0474612	-2.54935	2.789447	2.196788	3.470169	3.821966
GBGT1	1.15242	3.2488	4.57085	0.00468834	0.0384166	-2.06586	2.390683	2.954486	3.852963	3.797053
PMEPA1	1.1517	7.84776	5.64484	0.00174972	0.0254728	-0.975968	7.155274	7.388551	8.501481	8.345744
PCDHA1	1.15077	0.980291	5.56492	0.00187377	0.0261899	-1.05158	0.5421754	0.2676385	1.6185972	1.4927513
CITED4	1.14998	5.74291	5.35861	0.00224381	0.0277504	-1.25069	5.064672	5.271164	6.463618	6.172175
MDGA1	1.14664	0.867865	6.09328	0.00120705	0.0217404	-0.566809	0.3420394	0.2470528	1.4570247	1.4253419
GPR137B	1.14639	3.61518	6.05173	0.00124817	0.0221382	-0.603674	3.103362	2.980610	4.194971	4.181774
ABCA7	1.14546	1.6755	5.55917	0.00188308	0.0261899	-1.05705	1.2358426	0.9696931	2.3134196	2.1830447
EFR3B	1.14425	0.760071	6.14795	0.00115531	0.0214429	-0.51863	0.1859507	0.1899458	1.3129269	1.3514596
KCNC3	1.1431	1.42338	3.70245	0.011678	0.0614562	-3.07262	1.2616085	0.4420386	1.9917731	1.9980799
PTPRJ	1.13971	2.6506	3.49373	0.0147929	0.0703472	-3.33185	2.521729	1.639757	3.156429	3.284468
ABHD15	1.1392	2.69609	5.78792	0.00155058	0.0241878	-0.842672	2.049356	2.203616	3.341497	3.189882
HSD17B3	1.13864	0.944512	6.12578	0.00117598	0.0215203	-0.538124	0.3647049	0.3856767	1.5096446	1.5180216
ZNF697	1.1373	3.59683	3.48333	0.0149709	0.0708359	-3.34493	3.466027	2.590334	4.079646	4.251315
HEXIM1	1.13724	4.39855	5.22302	0.00253295	0.0291814	-1.38469	4.014705	3.645158	5.005795	4.928543
VWA5A	1.13678	2.33425	5.5405	0.00191367	0.0262966	-1.07485	1.656135	1.875586	2.997121	2.808158
INCA1	1.13632	2.90152	3.19425	0.0210164	0.0874578	-3.71483	2.825345	1.841382	3.579755	3.359606
GPR37	1.13514	1.43788	6.07966	0.00122035	0.0218876	-0.578869	0.8890798	0.8515351	2.0305925	1.9802963
LGMN	1.1306	3.36487	5.36215	0.00223679	0.0277172	-1.24722	2.633840	2.965307	3.926264	3.934085
PNKD	1.13038	3.3945	5.19388	0.00260055	0.0294561	-1.41382	2.640953	3.017663	3.965855	3.953530
TMEM63B	1.13008	4.64293	5.67151	0.00171046	0.0251975	-0.950924	4.193282	3.962506	5.240232	5.175718
FZD8	1.12993	4.28824	5.80188	0.0015326	0.0240999	-0.829811	3.789336	3.657215	4.924554	4.781851
NTSR1	1.12894	2.44939	5.33321	0.00229495	0.0280064	-1.2756	2.005666	1.764183	3.131660	2.896069
ZNF219	1.12786	3.03148	5.15789	0.00268694	0.0297752	-1.44996	2.634398	2.300704	3.689834	3.500979
TP53INP1	1.12389	2.77289	2.48248	0.0510891	0.152611	-4.66715	2.866811	1.555069	3.133540	3.536124
CLSTN1	1.12387	5.06531	5.31483	0.00233279	0.0281504	-1.29367	4.659662	4.347095	5.688645	5.565847
SPSB4	1.12338	1.1222	5.40233	0.00215883	0.0275209	-1.20802	0.4957954	0.6252325	1.8250803	1.5427011
COL18A1	1.12334	2.6374	4.85997	0.0035439	0.0339471	-1.75623	2.292242	1.859220	3.272357	3.125778
GPR132	1.12238	1.20239	5.86936	0.00144898	0.0234849	-0.767966	0.6146306	0.6677784	1.6929321	1.8342302
OMP	1.12051	0.88627	5.75577	0.00159295	0.0243377	-0.872402	0.4157574	0.2362743	1.4101980	1.4828494
HAP1	1.12013	0.833083	5.96599	0.00133827	0.0229716	-0.680403	0.2842845	0.2617464	1.4371515	1.3491492
TBC1D8	1.11964	3.88858	4.87514	0.00349331	0.0335631	-1.74032	3.553159	3.104357	4.444799	4.452001
ABAT	1.11886	1.25541	5.9933	0.00130878	0.022771	-0.655867	0.7229574	0.6689946	1.7996300	1.8300500
SNX21	1.11814	3.87043	5.77022	0.00157374	0.0241878	-0.859021	3.243061	3.379655	4.490696	4.368299
RND1	1.11613	1.35646	4.00801	0.0083623	0.0517266	-2.70508	0.4539112	1.1428880	1.9010189	1.9280340
RCAN3	1.11409	2.24431	3.56632	0.0136146	0.0672474	-3.24095	2.102245	1.272280	2.845862	2.756839
LOC81691	1.11403	2.16457	5.47481	0.00202598	0.0269316	-1.13784	1.469619	1.745488	2.716157	2.727006
ECE1	1.11383	4.87975	5.39514	0.00217254	0.0275922	-1.21501	4.175382	4.470290	5.462622	5.410720
S100A2	1.11313	7.43013	2.85435	0.0318335	0.112735	-4.16353	6.304186	7.442951	8.008221	7.965169
LRFN5	1.11182	0.587004	5.42399	0.00211809	0.0274121	-1.18696	0.06219174	0.00000000	1.00227528	1.28354789
F8A1	1.11101	2.12764	5.87109	0.00144692	0.0234849	-0.766395	1.622375	1.521886	2.716018	2.650270
ZFP36	1.11083	5.16938	3.76344	0.0109123	0.0591348	-2.99811	4.994840	4.233093	5.709731	5.739872
IGSF9	1.10776	0.848454	5.16559	0.00266819	0.0297479	-1.44222	0.4696959	0.1194557	1.3700186	1.4346440
SLC16A13	1.10647	1.82412	5.47016	0.00203422	0.0269785	-1.14233	1.403123	1.138651	2.362721	2.391984
TNFSF9	1.10548	4.73218	4.39112	0.00561181	0.0417474	-2.26469	3.903865	4.455007	5.346506	5.223322
FUCA1	1.10541	4.29269	5.95036	0.00135551	0.0230673	-0.694496	3.741862	3.738099	4.841380	4.849400
TRNP1	1.10534	6.9204	3.66451	0.0121848	0.062865	-3.11926	5.980927	6.754527	7.552694	7.393443
HES7	1.10527	3.15638	5.42297	0.00212	0.0274121	-1.18796	2.574452	2.633037	3.845289	3.572749
TMSB15B	1.10405	1.81265	5.48319	0.00201123	0.0268753	-1.12977	1.157466	1.363783	2.287012	2.442329
STX11	1.10402	0.919817	5.83414	0.00149196	0.023765	-0.800178	0.4264439	0.3091724	1.4847264	1.4589253
RGL1	1.1035	2.2648	5.55097	0.00189645	0.0261899	-1.06487	1.819501	1.606604	2.766388	2.866715
JUNB	1.10232	7.58657	3.18588	0.021228	0.0880516	-3.72571	6.562588	7.508240	8.246034	8.029427
ACTN2	1.09835	1.2299	5.49428	0.00199192	0.0267955	-1.11911	0.7972758	0.5641791	1.7404681	1.8176939
ADAR	1.09792	6.27655	4.77695	0.00383598	0.0352393	-1.84386	5.951321	5.503857	6.848561	6.802449
APOBEC3G	1.09673	3.98677	3.03214	0.0255635	0.0987092	-3.92713	2.924616	3.952185	4.579839	4.490420
C10orf54	1.09655	2.61471	5.17632	0.00264229	0.0296268	-1.43143	1.932108	2.200757	3.265915	3.060044
HES1	1.09573	4.61655	5.48904	0.00200102	0.0267955	-1.12415	4.156351	3.981027	5.248520	5.080317
SMTN	1.09534	4.59095	5.17142	0.00265408	0.0296604	-1.43635	3.878492	4.208060	5.176661	5.100574
DLX2	1.09318	3.17725	3.13369	0.0226013	0.0915216	-3.79376	3.116494	2.144832	3.792578	3.655109
CBR3	1.0931	1.82602	3.77591	0.0107629	0.0588091	-2.98295	0.9153835	1.6435555	2.4323805	2.3127590
SEMA4B	1.09261	3.53282	5.7741	0.00156864	0.0241878	-0.855437	2.967995	3.005036	4.136163	4.022089
KCNK1	1.0917	3.46496	5.87476	0.00144253	0.0234849	-0.763045	2.926173	2.912052	4.005590	4.016025
AHRR	1.08976	3.2582	4.06897	0.00783662	0.049759	-2.63348	3.029151	2.397485	3.858164	3.747987
RAET1E	1.08775	1.977	5.54175	0.0019116	0.0262966	-1.07366	1.337780	1.528459	2.475943	2.565799
HHLA3	1.08737	4.15823	3.81903	0.0102634	0.0574244	-2.93069	3.972269	3.256830	4.726625	4.677213
PGF	1.0865	1.85585	4.93504	0.00330157	0.0325541	-1.67785	1.124623	1.500581	2.455914	2.342282
PAPSS2	1.08631	3.80627	5.32837	0.00230484	0.0280064	-1.28035	3.400569	3.125654	4.373924	4.324925
TGFB1	1.08615	4.57316	4.23211	0.00660479	0.0452153	-2.44471	4.301813	3.758360	5.229224	5.003254
CACNG8	1.08488	2.23442	3.06197	0.0246512	0.096315	-3.88782	2.193287	1.190677	2.783757	2.769960
POM121C	1.08305	3.29833	2.13228	0.0809349	0.204721	-5.14609	3.541191	1.972420	3.882827	3.796876
MVP	1.07955	6.42278	3.41473	0.0162067	0.0742899	-3.43166	5.458959	6.307048	6.992476	6.932638
FAM84A	1.07913	0.686843	5.67691	0.00170264	0.0251975	-0.945861	0.1079979	0.1865579	1.2808071	1.1720095
TCF7L2	1.07779	3.37462	1.91184	0.108632	0.247186	-5.44483	3.719965	1.951480	3.933216	3.893806
RAPH1	1.07597	2.84002	1.78476	0.128811	0.274447	-5.61429	3.252792	1.351275	3.311953	3.444062
ADPRH	1.07436	3.4666	5.12062	0.00277991	0.0302807	-1.48759	2.792567	3.066275	4.090669	3.916899
PARD6G	1.07432	1.97178	3.80295	0.0104466	0.0580267	-2.95015	1.784966	1.084280	2.557378	2.460510
A4GALT	1.07368	3.08652	5.06824	0.00291687	0.0311124	-1.54078	2.380911	2.718444	3.636128	3.610585
MBLAC1	1.07237	2.05704	5.09344	0.00285002	0.0306814	-1.51514	1.356213	1.685503	2.597022	2.589429
ALOX15B	1.07235	0.745082	5.51736	0.0019524	0.0265327	-1.09698	0.1249983	0.2928116	1.2366091	1.3259086
MGAT4B	1.07188	5.12419	4.71132	0.00408652	0.03614	-1.91387	4.786816	4.389683	5.750813	5.569446
FKBP9	1.07132	5.87238	5.58474	0.00184209	0.0259721	-1.03276	5.266525	5.406910	6.445576	6.370500
GAREM1	1.07048	1.29095	5.42757	0.00211145	0.0274121	-1.18349	0.8579298	0.6534974	1.8672734	1.7851039
SALL1	1.07034	3.91914	2.23643	0.0705012	0.187086	-5.00378	4.116566	2.651370	4.432068	4.476551
SHROOM2	1.07019	2.19141	4.16818	0.00705923	0.0467741	-2.51819	1.940441	1.372189	2.804117	2.648889
TNS2	1.06858	3.22165	4.14475	0.00723466	0.0474612	-2.54529	2.979500	2.395222	3.809941	3.701934
SCNN1D	1.06804	1.72758	3.29588	0.0186262	0.0808525	-3.58346	1.6340488	0.7530679	2.2871775	2.2360201
LMO2	1.06779	1.23215	4.77197	0.00385436	0.0352424	-1.84915	0.4937322	0.9027819	1.7999799	1.7321211
PLA2G4C	1.0673	0.860336	5.38739	0.00218744	0.0276413	-1.22257	0.3457650	0.3076063	1.5068345	1.2811377
SYN3	1.06705	1.336	5.5989	0.00181983	0.0257811	-1.01933	0.8441051	0.7608495	1.8122112	1.9268360
MYLK	1.06676	1.75221	4.02033	0.0082529	0.0514318	-2.69056	1.5304137	0.9072463	2.3308628	2.2403163
TP53I11	1.06499	1.73641	5.13722	0.00273806	0.0300037	-1.47081	1.355158	1.052678	2.291743	2.246069
DDO	1.06455	2.0536	5.14733	0.00271291	0.0298817	-1.4606	1.671546	1.371098	2.569602	2.602142
GJC2	1.06433	2.28857	4.8509	0.00357454	0.0341217	-1.76575	1.766030	1.746784	3.014540	2.626932
MAST3	1.064	2.27786	3.30569	0.0184119	0.0801401	-3.57086	2.180286	1.311438	2.855327	2.764398
MFAP2	1.06362	2.35871	3.8645	0.00976497	0.0556729	-2.87591	1.489511	2.164283	2.898389	2.882640
ALDH1L1	1.06309	0.648668	5.55111	0.00189621	0.0261899	-1.06473	0.06562858	0.16861544	1.23805330	1.12237494
SLC22A17	1.06243	1.42759	5.40135	0.0021607	0.0275209	-1.20897	0.8484960	0.9442574	2.0550603	1.8625507
SLC4A11	1.06203	1.74132	5.17585	0.00264343	0.0296268	-1.4319	1.343892	1.076716	2.216335	2.328330
COL9A2	1.06151	3.23597	5.43258	0.00210219	0.0273756	-1.17864	2.797564	2.612870	3.807015	3.726448
KCNF1	1.06109	1.07468	4.9284	0.00332219	0.0326056	-1.68474	0.3647049	0.7235620	1.5822433	1.6282114
SLC16A4	1.06009	3.34301	4.61089	0.00450702	0.0375911	-2.02223	3.005625	2.620306	3.756593	3.989508
ALPK1	1.05947	2.00229	3.62366	0.0127581	0.0644761	-3.16972	1.820902	1.124217	2.392656	2.671397
C9orf172	1.05832	2.03923	3.29543	0.0186361	0.080868	-3.58404	1.944905	1.075238	2.589119	2.547665
CASC10	1.05802	2.43862	5.62168	0.00178468	0.0255803	-0.997799	1.953796	1.865416	2.991681	2.943578
CABYR	1.05763	1.5781	3.68186	0.01195	0.062237	-3.09791	1.371771	0.726793	1.937880	2.275942
IRF9	1.05687	3.19768	4.86161	0.00353837	0.0339196	-1.7545	2.567815	2.770670	3.884014	3.568217
PIM2	1.05591	4.05496	5.53204	0.00192772	0.0263936	-1.08293	3.573629	3.480381	4.639036	4.526795
FARP2	1.05565	1.71753	4.79566	0.00376782	0.0350421	-1.82402	1.3796242	0.9997782	2.2948823	2.1958243
PLK3	1.05553	5.077	4.76276	0.00388865	0.0352889	-1.85895	4.357630	4.740852	5.665033	5.544501
HIST2H2BE	1.05539	4.05974	5.32668	0.00230832	0.0280064	-1.28201	3.628178	3.435900	4.649732	4.525135
GRASP	1.0532	1.27385	5.31243	0.0023378	0.0281504	-1.29604	0.6852392	0.8092582	1.8974385	1.7034525
FCMR	1.05296	1.93069	5.31883	0.00232449	0.0281226	-1.28973	1.517673	1.290736	2.465452	2.448885
RASL11A	1.05191	1.97504	5.6117	0.00179998	0.0256382	-1.00722	1.434576	1.463600	2.540215	2.461783
SSH1	1.05182	4.42271	3.18829	0.0211667	0.0878829	-3.72257	4.348604	3.444992	4.981999	4.915229
USP27X	1.05178	1.96317	5.48921	0.00200073	0.0267955	-1.12398	1.395813	1.478737	2.422853	2.555265
RDM1	1.05071	1.34028	5.28942	0.00238631	0.0283344	-1.31875	0.7289162	0.9009309	1.7863521	1.9449196
S1PR2	1.04978	2.36413	5.14874	0.00270941	0.0298753	-1.45917	1.977735	1.700743	2.907269	2.870768
GMIP	1.04927	3.81362	5.59848	0.00182049	0.0257811	-1.01973	3.257553	3.320413	4.365297	4.311217
TCAF2	1.04832	1.55556	5.21194	0.00255841	0.0292638	-1.39575	1.1589736	0.9038365	2.0669871	2.0924603
IL13RA1	1.04793	2.90907	3.1478	0.0222206	0.0906401	-3.77533	2.837675	1.932532	3.356015	3.510059
THBS1	1.04744	6.24739	2.35744	0.0601277	0.169952	-4.83816	6.393473	5.053856	6.736486	6.805732
DNM1	1.04695	3.97056	4.00085	0.00842667	0.0519192	-2.71353	3.751294	3.142876	4.529621	4.458449
RNF208	1.04669	1.81599	2.66608	0.040356	0.131183	-4.41726	1.8619110	0.7233757	2.2602213	2.4184517
GINS4	1.0463	1.80817	4.74776	0.00394516	0.0354171	-1.87492	1.472687	1.097353	2.391391	2.271240
IRF1	1.0458	1.36697	4.65879	0.00430058	0.0367619	-1.97036	0.6993006	0.9888472	2.0412186	1.7385204
PIEZO1	1.04487	5.17197	2.29228	0.065497	0.179203	-4.92735	5.340265	3.958791	5.730860	5.657945
BMP2	1.0448	4.83224	4.76243	0.00388986	0.0352889	-1.85929	4.503805	4.115881	5.355994	5.353299
C10orf10	1.04353	1.19768	5.08854	0.00286289	0.0307459	-1.52012	0.7979763	0.5538468	1.6422918	1.7965994
ACSL5	1.04288	0.953727	5.23434	0.00250722	0.029106	-1.3734	0.3360198	0.5285526	1.4039737	1.5463636
UBE2L6	1.04272	5.63398	4.43462	0.00537055	0.0407769	-2.2161	4.880116	5.345117	6.213039	6.097632
TRIM48	1.04166	0.583353	5.52119	0.00194592	0.026501	-1.09331	0.04035990	0.08469046	1.15437549	1.05398646
FAM127B	1.04088	6.07644	4.11657	0.00745215	0.0481304	-2.57798	5.831183	5.280812	6.671265	6.522481
ZC3H4	1.03968	3.94419	5.13074	0.00275431	0.0301044	-1.47735	3.545441	3.303270	4.522728	4.405334
MPZ	1.0393	4.10223	4.4134	0.00548675	0.0411281	-2.23977	3.346746	3.818412	4.669122	4.574637
CTHRC1	1.03775	4.8017	5.27327	0.00242104	0.0285612	-1.33473	4.389268	4.176384	5.302300	5.338860
INHBA	1.03475	6.89415	4.54097	0.00482908	0.0389185	-2.09858	6.535757	6.217787	7.260437	7.562611
GPC1	1.03451	4.64216	5.17131	0.00265434	0.0296604	-1.43646	4.029433	4.220370	5.237605	5.081218
ETV6	1.03427	2.49571	3.0584	0.0247585	0.096587	-3.89252	2.447911	1.509235	2.997669	3.028024
MAG	1.03392	1.44304	4.55342	0.00476985	0.0387036	-2.08492	1.1251476	0.7270049	1.8736158	2.0463758
SYNPO	1.03308	3.94269	3.53018	0.0141876	0.068776	-3.28611	3.799340	3.052961	4.503110	4.415343
CCNE1	1.03277	3.33003	4.82697	0.00365684	0.0344712	-1.79094	2.654296	2.972992	3.922172	3.770660
NLRP1	1.03234	3.03778	5.10455	0.00282111	0.0304957	-1.50386	2.624892	2.418328	3.470312	3.637589
SLC20A1	1.03176	7.94505	4.65215	0.00432854	0.0368855	-1.97752	7.624876	7.233468	8.508294	8.413571
CYB5R2	1.03116	0.897945	5.40164	0.00216014	0.0275209	-1.20869	0.3095644	0.4551673	1.4206238	1.4064250
MRC2	1.02757	4.25806	5.41791	0.00212944	0.0275063	-1.19287	3.766818	3.721735	4.831367	4.712320
ITGAX	1.02748	1.149	5.23447	0.00250692	0.029106	-1.37327	0.7395966	0.5309177	1.6475570	1.6779207
SRGAP3	1.02655	1.74128	4.31023	0.00609393	0.0437068	-2.35578	1.4755331	0.9804866	2.2637016	2.2454130
TNFAIP3	1.02643	4.20142	3.50049	0.0146785	0.0701193	-3.32336	4.065179	3.311236	4.720212	4.709056
SELM	1.02584	4.30089	3.77449	0.0107798	0.0588107	-2.98468	3.466595	4.109351	4.887328	4.740300
AMOTL1	1.02555	5.50472	3.33526	0.0177827	0.0789053	-3.53295	5.398767	4.585127	6.000246	6.034755
BBC3	1.02542	2.66637	3.34285	0.0176249	0.0785049	-3.52323	1.770243	2.537082	3.311517	3.046652
CXCR2	1.02519	0.522614	5.46517	0.0020431	0.0270323	-1.14714	0.02003318	0.00000000	1.07752543	0.99289735
ETV7	1.02519	0.566037	5.32828	0.00230502	0.0280064	-1.28043	0.05177955	0.05510982	1.16195211	0.99530753
NOL4L	1.02486	2.49523	2.78422	0.0347543	0.119569	-4.25767	2.509831	1.455764	3.040721	2.974587
EXTL1	1.02446	3.28215	5.36631	0.00222857	0.0276958	-1.24315	2.812282	2.727549	3.854077	3.734672
DAG1	1.02387	3.47813	4.18877	0.00690915	0.0462345	-2.49446	2.737227	3.195169	4.121502	3.858634
SOD3	1.0233	4.15439	5.21686	0.00254707	0.0292263	-1.39084	3.613430	3.672051	4.766570	4.565504
KIF6	1.02316	1.27943	5.23013	0.00251677	0.029106	-1.3776	0.6686596	0.8670488	1.7673506	1.8146766
ENGASE	1.02251	4.08911	4.61618	0.00448367	0.0374835	-2.01648	3.777285	3.378428	4.621208	4.579528
IL12RB1	1.02235	0.906438	5.22989	0.0025173	0.029106	-1.37784	0.2945406	0.4959827	1.4077203	1.4275099
ADAMTS9	1.02215	0.993761	5.14176	0.00272673	0.0299309	-1.46622	0.5887359	0.3766377	1.4538392	1.5558300
SLC8B1	1.02117	2.59617	4.91303	0.00337059	0.0329282	-1.70074	1.949259	2.221907	3.180458	3.033054
ARID1A	1.02063	4.74448	1.82621	0.121846	0.265991	-5.55932	5.109790	3.358542	5.276747	5.232849
REEP2	1.01778	4.12264	4.43203	0.0053846	0.0407769	-2.21899	3.391088	3.836412	4.659167	4.603898
TEX37	1.01768	0.508838	4.70046	0.00412976	0.0362625	-1.92551	0.0000000	0.0000000	0.8328562	1.2024971
C6orf58	1.01675	0.532567	5.40261	0.00215829	0.0275209	-1.20774	0.0483834	0.0000000	0.9969242	1.0849614
SLC26A1	1.01654	2.34452	2.80412	0.0338972	0.117433	-4.23092	2.352050	1.320442	2.892193	2.813381
PLEKHO2	1.01653	3.87144	3.72781	0.0113525	0.0603644	-3.04157	3.035879	3.690467	4.433795	4.325603
GALNT12	1.01559	1.87039	5.30136	0.002361	0.0281914	-1.30696	1.295523	1.429660	2.417739	2.338627
VAT1L	1.01321	1.98204	5.42936	0.00210814	0.0274121	-1.18176	1.501197	1.449677	2.473634	2.503669
BCL6	1.01264	2.44229	3.25035	0.0196574	0.083933	-3.64214	2.350500	1.521434	2.918592	2.978624
FBN1	1.01238	2.04172	3.4925	0.0148139	0.0703573	-3.3334	1.880145	1.190921	2.413804	2.682015
GALNT6	1.01206	3.07217	5.4327	0.00210198	0.0273756	-1.17852	2.544064	2.588221	3.586267	3.570141
SRCAP	1.01014	5.03628	1.77922	0.129771	0.275759	-5.62162	5.421914	3.640512	5.579152	5.503561
RASA3	1.00948	5.03532	5.23244	0.00251152	0.029106	-1.37529	4.454424	4.606738	5.581331	5.498801
HIVEP3	1.00911	1.57649	2.28487	0.066139	0.180338	-4.9375	1.7377120	0.4061591	2.0887398	2.0733456
HGSNAT	1.00901	3.30922	5.0328	0.00301393	0.0315144	-1.577	2.920251	2.689176	3.862341	3.765099
TIRAP	1.00848	3.25268	4.61872	0.00447252	0.0374835	-2.01373	2.937312	2.559562	3.730564	3.783270
TMPPE	1.00845	1.81758	3.97927	0.00862391	0.0522444	-2.73904	1.599704	1.027017	2.330383	2.313237
HIST1H4K	1.00733	2.24118	3.18382	0.0212802	0.0882398	-3.72838	2.163100	1.311923	2.741504	2.748188
SUFU	1.00651	3.24658	5.3409	0.00227933	0.0279464	-1.26805	2.729132	2.757514	3.800729	3.698947
POLH	1.00586	3.31265	3.47101	0.0151848	0.0716017	-3.36046	3.173907	2.445546	3.878670	3.752496
BTG1	1.00533	6.70672	3.68472	0.0119118	0.0620986	-3.09439	6.535779	5.872325	7.224642	7.194128
SERPINE1	1.00481	5.44841	5.03911	0.00299638	0.0314338	-1.57054	4.843888	5.048126	6.014764	5.886878
MMP1	1.00479	2.12882	4.29518	0.00618873	0.0439735	-2.37283	1.532968	1.719880	2.414185	2.848244
CMBL	1.00463	3.99705	5.05613	0.00294963	0.0311993	-1.55314	3.379227	3.610249	4.519276	4.479458
TRIM49C	1.00437	0.5961	5.1793	0.00263515	0.0296119	-1.42844	0.13067703	0.05715065	1.01336815	1.18320402
GAS1	1.00434	1.70199	5.00587	0.00309019	0.0317584	-1.60464	1.084365	1.315269	2.153696	2.254626
SASH1	1.00414	2.56551	2.37962	0.0584076	0.166425	-4.80779	2.692554	1.434332	3.042658	3.092506
TFDP1	1.003	5.36602	3.37071	0.0170595	0.07687	-3.48765	5.247022	4.482022	5.921485	5.813558
PCSK1N	1.00299	0.605655	5.10949	0.00280836	0.0304368	-1.49885	0.2083187	0.0000000	1.1237869	1.0905125
DNAJC22	1.00269	3.19041	5.09639	0.00284232	0.0306731	-1.51214	2.796463	2.581673	3.683068	3.700441
SIX5	1.00222	3.27312	4.67067	0.00425109	0.0366155	-1.95755	2.934094	2.609928	3.849005	3.699450
GNG4	1.00125	4.21214	5.18903	0.00261201	0.0294813	-1.41868	3.672729	3.750296	4.790397	4.635127
ABTB2	1.00067	3.745	4.89846	0.00341719	0.0331053	-1.71594	3.103864	3.385479	4.256696	4.233982
COL27A1	1.00032	3.56036	3.09374	0.0237188	0.0941681	-3.84607	3.499982	2.620424	4.061517	4.059533
SIN3A	1.00001	3.35764	2.18833	0.0751332	0.194823	-5.06955	3.548531	2.166746	3.794286	3.921015
SRSF8	0.999885	3.24566	4.04288	0.00805689	0.0506297	-2.66405	3.016367	2.475060	3.764849	3.726349
EFNB1	0.999782	3.10886	3.87943	0.00960733	0.0551503	-2.85799	2.321718	2.896227	3.683608	3.533901
EGR4	0.999162	0.922105	4.6793	0.00421553	0.0364737	-1.94826	0.3531251	0.4919228	1.2610412	1.5823300
CCDC102A	0.999082	2.72388	4.75911	0.00390231	0.0352889	-1.86283	2.067378	2.381302	3.265602	3.181243
TNC	0.998421	7.69537	5.22018	0.00253945	0.0292228	-1.38752	7.261734	7.130580	8.232455	8.156701
VLDLR	0.997842	2.42462	3.87072	0.00969895	0.0554585	-2.86844	2.213462	1.637928	2.997159	2.849915
FDXR	0.997404	6.1919	2.85721	0.0317203	0.112521	-4.1597	5.204460	6.181945	6.738988	6.642226
SEMA3B	0.997213	7.2847	4.67046	0.00425196	0.0366155	-1.95778	6.625434	6.946761	7.852554	7.714067
SMPDL3B	0.997107	1.00215	5.22608	0.00252596	0.0291271	-1.38163	0.4449326	0.5622614	1.4582734	1.5431340
CORO2B	0.994796	3.52875	4.00464	0.00839256	0.0518412	-2.70906	3.302660	2.760040	4.064980	3.987312
WFDC10B	0.994622	0.678332	5.32523	0.00231129	0.0280159	-1.28344	0.1756214	0.1864203	1.1436662	1.2076189
MRPS6	0.993574	6.19441	4.78926	0.00379097	0.0351078	-1.8308	5.557611	5.837645	6.754151	6.628253
ITGAM	0.992614	0.514726	5.33421	0.00229291	0.0280064	-1.27461	0.03683815	0.00000000	1.01211145	1.00995430
PSMB6	0.992435	7.06287	3.60372	0.0130489	0.0653878	-3.19444	6.234833	6.898481	7.622604	7.495579
SAMD1	0.992367	5.03058	4.37561	0.00570076	0.0419967	-2.28207	4.705811	4.362980	5.658559	5.394967
DHFR	0.992222	3.05782	5.10828	0.00281148	0.030443	-1.50008	2.468093	2.655327	3.542153	3.565711
TCN2	0.991195	2.47272	4.42636	0.00541544	0.0408176	-2.22531	1.771187	2.183057	2.940421	2.996213
SLC9A1	0.991025	4.1542	3.3028	0.0184749	0.0803291	-3.57458	4.048911	3.268467	4.682251	4.617177
TRPV4	0.990147	4.51467	4.83466	0.00363014	0.0344123	-1.78283	3.877400	4.161783	5.027741	4.991737
DUSP14	0.990074	6.55069	3.63548	0.0125891	0.0639608	-3.15509	5.732591	6.378721	7.117485	6.973975
GPR87	0.988932	0.494466	4.94013	0.00328581	0.0325351	-1.67256	0.0000000	0.0000000	0.8649242	1.1129399
HIST1H2BC	0.988878	1.36214	2.74949	0.0363079	0.122654	-4.30447	0.3576221	1.3777807	1.8150433	1.8981149
MFI2	0.988731	5.51432	4.99607	0.00311849	0.0318271	-1.61473	5.109600	4.930307	6.078210	5.939159
CAPG	0.98784	5.72885	2.00429	0.0959901	0.227487	-5.3201	4.478318	5.991534	6.277667	6.167865
FAM84B	0.986992	4.82887	2.62236	0.0426704	0.135908	-4.47658	4.877477	3.793268	5.277599	5.367131
PLXNB1	0.986969	3.6156	4.75805	0.0039063	0.0352889	-1.86396	3.274289	2.969934	4.128525	4.089634
CPT1A	0.985748	2.75842	4.26324	0.00639561	0.04472	-2.40916	2.492819	2.038268	3.277676	3.224907
AMOT	0.985451	2.09551	3.55569	0.0137804	0.0676036	-3.25422	1.935961	1.269600	2.512006	2.664456
MS4A15	0.98433	0.872841	5.00847	0.00308274	0.0317584	-1.60197	0.2742752	0.4870768	1.3726385	1.3573726
RGAG4	0.983496	1.47408	4.59107	0.00459577	0.0379656	-2.0438	1.1590243	0.8056303	1.9805711	1.9510755
PRAME	0.983486	6.21519	5.1563	0.00269082	0.0297924	-1.45156	5.660131	5.786764	6.741139	6.672728
TCEA3	0.982993	1.01676	4.31624	0.00605651	0.0435599	-2.34897	0.3301423	0.7203844	1.6076072	1.4089058
ARSA	0.98252	3.47516	5.14253	0.0027248	0.0299309	-1.46544	2.986008	2.981799	4.040685	3.892161
PAEP	0.98234	1.13498	4.76985	0.00386224	0.0352788	-1.85141	0.7885212	0.4990909	1.6561476	1.5961440
IFNGR2	0.98165	5.12012	4.27012	0.00635037	0.0445711	-2.40132	4.410652	4.847938	5.664319	5.557570
NLRP10	0.981497	0.715031	4.71364	0.00407735	0.0361089	-1.91138	0.2176896	0.2308750	1.0495639	1.3619957
SPRED3	0.981181	3.62956	3.32502	0.0179979	0.0792278	-3.54606	3.518984	2.758956	4.147732	4.092571
FAM214B	0.98003	4.92033	4.10368	0.00755413	0.0486416	-2.59298	4.186986	4.673644	5.465128	5.355562
SLC19A3	0.978758	1.21483	5.06687	0.00292056	0.0311124	-1.54218	0.7073566	0.7435513	1.7904151	1.6180081
VCX3B	0.977572	3.41799	3.05007	0.0250109	0.0972546	-3.90349	2.524198	3.334219	4.062804	3.750756
MYD88	0.97658	2.29885	4.14537	0.00722994	0.0474612	-2.54457	1.593013	2.028110	2.890324	2.683959
BHLHE40	0.976063	5.30497	4.07481	0.00778829	0.0495752	-2.62666	5.062417	4.571452	5.846830	5.739167
PRR12	0.975473	3.85906	2.05614	0.0895707	0.217947	-5.24977	4.093965	2.648690	4.410120	4.283481
MBD3L2	0.975081	0.487541	4.87759	0.00348524	0.0335107	-1.73776	0.000000	0.000000	0.852294	1.097868
APOL6	0.975034	2.38579	5.04844	0.00297065	0.0312922	-1.561	1.982152	1.814400	2.847064	2.899557
RBPJL	0.973924	0.732783	4.94713	0.00326434	0.0323851	-1.6653	0.1771292	0.3145127	1.3035505	1.1359403
SNX29	0.973843	2.18967	3.66834	0.0121325	0.0627823	-3.11455	2.012089	1.393398	2.736855	2.616318
LGALS3BP	0.972759	8.33093	4.01092	0.00833637	0.051675	-2.70165	7.593423	8.095672	8.881168	8.753445
SLC41A1	0.972402	5.21623	5.14855	0.00270991	0.0298753	-1.45937	4.731655	4.728396	5.759182	5.645674
NOTCH2	0.97151	5.14979	1.87284	0.114461	0.255407	-5.49711	5.468562	3.859508	5.657438	5.613651
C11orf68	0.971108	8.24108	5.20682	0.00257028	0.0292687	-1.40087	7.782015	7.729044	8.735217	8.718057
BCL9	0.968933	3.28757	3.00507	0.0264239	0.100704	-3.96291	3.239217	2.366994	3.812052	3.732025
ISM1	0.968159	0.701036	5.08831	0.00286349	0.0307459	-1.52035	0.2511315	0.1827808	1.2444752	1.1257561
TREM1	0.968054	0.572112	5.17632	0.0026423	0.0296268	-1.43143	0.05709862	0.11907153	1.03770028	1.07457824
PACS1	0.967321	4.01298	2.3238	0.0628391	0.174769	-4.88421	4.146820	2.911823	4.540097	4.453188
B3GALT5	0.967032	2.19201	3.11836	0.023023	0.0924392	-3.81381	2.120499	1.296489	2.698344	2.652707
SHC4	0.9667	2.1982	4.83212	0.00363893	0.0344446	-1.78551	1.809516	1.620175	2.602325	2.760767
C20orf141	0.965566	0.85229	3.75415	0.0110253	0.05952	-3.00943	0.07678956	0.66222509	1.37634270	1.29380295
PCED1B	0.965473	3.97334	4.33206	0.0059593	0.0430794	-2.33109	3.695207	3.285992	4.452689	4.459456
CHST12	0.964305	3.43322	4.39743	0.00557603	0.041578	-2.25761	2.790632	3.111497	4.023850	3.806889
COL5A2	0.96378	3.86174	4.71796	0.00406035	0.0360331	-1.90676	3.518821	3.240882	4.318337	4.368926
HSPA1B	0.963007	1.31236	4.93972	0.00328709	0.0325351	-1.67299	0.7534015	0.9083209	1.8544489	1.7332872
DPYSL2	0.962205	2.40642	3.90817	0.00931184	0.0544146	-2.82359	2.193287	1.657349	2.904700	2.870346
ISYNA1	0.961993	4.5111	4.81931	0.00368364	0.0345862	-1.79902	3.940834	4.119380	5.074429	4.909771
CST7	0.961846	1.59084	4.37721	0.00569154	0.0419967	-2.28028	1.130934	1.088903	2.265704	1.877825
C1orf116	0.961509	3.87367	4.53285	0.00486812	0.0390794	-2.10748	3.222843	3.562985	4.361018	4.347828
RARG	0.961073	4.32249	4.84543	0.00359316	0.0342247	-1.7715	3.799964	3.883935	4.910697	4.695348
SIDT2	0.960467	3.47963	4.94467	0.00327187	0.0324346	-1.66785	3.005951	2.992841	4.054020	3.865707
SECTM1	0.960088	3.05025	3.19362	0.0210322	0.0874719	-3.71565	2.178856	2.961549	3.563849	3.496731
MOV10	0.959218	4.67812	5.0031	0.00309815	0.0317615	-1.60749	4.121968	4.275060	5.176841	5.138624
NOTCH1	0.959089	3.59361	2.70393	0.0384613	0.127421	-4.366	3.613408	2.614722	4.125930	4.020378
PRODH	0.95908	0.83455	4.63732	0.00439177	0.037158	-1.99357	0.2263780	0.4836416	1.3933881	1.2347923
CD9	0.958909	6.63058	3.00019	0.0265823	0.100991	-3.96936	5.722870	6.579379	7.168333	7.051734
ALAS1	0.958641	6.56799	5.02948	0.00302321	0.0315599	-1.5804	6.029103	6.148239	7.085955	7.008670
RNASEL	0.958457	2.71884	3.66734	0.012146	0.0627823	-3.11577	2.488692	1.990527	3.021187	3.374945
MLXIPL	0.957616	0.844161	4.20228	0.00681255	0.0458567	-2.47892	0.5847039	0.1460009	1.3235312	1.3224063
AGRN	0.956992	7.04877	1.84821	0.118304	0.260896	-5.53002	7.369970	5.770576	7.601662	7.452867
MUC5B	0.956928	1.41277	2.62394	0.0425846	0.135721	-4.47444	1.4549544	0.4136608	1.8612348	1.9212360
CHRDL1	0.956808	1.83322	4.456	0.00525636	0.0403985	-2.19234	1.518697	1.190931	2.239658	2.383585
FBXL7	0.956166	2.11338	2.87552	0.0310054	0.11097	-4.13521	2.091661	1.178930	2.633490	2.549433
ARVCF	0.955748	2.69235	5.01048	0.00307698	0.0317584	-1.5999	2.237143	2.191817	3.238647	3.101809
VHL	0.955229	5.35531	3.65592	0.0123028	0.0631589	-3.12985	5.176563	4.578820	5.895442	5.770399
HR	0.955159	4.14109	4.07251	0.00780729	0.0496715	-2.62934	3.882066	3.444955	4.712747	4.524592
EPOR	0.954211	3.34181	4.7882	0.00379485	0.0351078	-1.83193	2.758197	2.971217	3.874071	3.763766
GNA15	0.954098	0.721633	4.98335	0.00315565	0.0319513	-1.62784	0.2374438	0.2517247	1.2754309	1.1219342
C1RL	0.954096	3.02361	4.66461	0.00427624	0.0366667	-1.96408	2.678923	2.414193	3.552859	3.448448
DHCR24	0.95336	6.17153	3.16175	0.0218509	0.0897909	-3.75712	5.302762	6.086940	6.693420	6.603002
IGSF9B	0.953287	2.90747	2.94511	0.0284446	0.105221	-4.04242	2.870905	1.990753	3.403084	3.365148
OSR2	0.952711	1.03694	5.00847	0.00308273	0.0317584	-1.60197	0.6237609	0.4974070	1.4878785	1.5387106
ALDOC	0.952652	5.41172	2.289	0.0657799	0.179656	-4.93184	4.323397	5.547400	5.980029	5.796072
NFASC	0.952358	2.09373	5.06581	0.00292341	0.0311124	-1.54326	1.653289	1.581810	2.602140	2.537676
HCFC1	0.951115	5.20692	2.30295	0.0645842	0.177835	-4.91275	5.340878	4.121847	5.747272	5.617682
ZFHX2	0.951045	0.955266	3.59505	0.0131776	0.0658519	-3.20519	0.7907532	0.1687332	1.4659834	1.3955937
FUS	0.949587	1.69686	4.99448	0.00312312	0.0318488	-1.61637	1.264946	1.179181	2.223625	2.119676
EXT2	0.948694	5.67005	3.33156	0.01786	0.0790571	-3.53768	4.840429	5.550975	6.193498	6.095294
CTSL	0.948447	6.80068	4.6231	0.00445333	0.0374134	-2.00897	6.186583	6.466335	7.312000	7.237812
HIPK2	0.94768	3.16672	1.82147	0.122623	0.266729	-5.56562	3.491612	1.894149	3.521347	3.759775
SULF2	0.947477	3.94722	4.77624	0.00383862	0.0352393	-1.84462	3.359010	3.587943	4.437787	4.404120
ZNF579	0.947289	3.76185	2.93332	0.0288618	0.106181	-4.05811	3.699238	2.877179	4.389624	4.081371
B4GALT1	0.946239	5.77509	3.69668	0.0117536	0.0616324	-3.07971	5.587020	5.016921	6.314482	6.181938
PCDH1	0.946149	5.25607	4.60946	0.00451338	0.0375911	-2.02379	4.658692	4.907300	5.804066	5.654225
GSN	0.94537	6.48545	2.90217	0.0299962	0.108564	-4.09962	5.568927	6.456600	6.985216	6.931051
RBPMS2	0.945027	2.38845	2.9241	0.0291925	0.106674	-4.07038	2.348193	1.483685	2.940291	2.781642
IL36G	0.944875	0.472437	4.53699	0.00484818	0.0389928	-2.10294	0.0000000	0.0000000	1.1013597	0.7883896
MR1	0.944663	2.94571	4.97547	0.00317894	0.0319845	-1.63597	2.413017	2.533748	3.442943	3.393148
PAPLN	0.944286	2.59496	3.4497	0.015563	0.0723971	-3.38736	2.456705	1.788935	3.079009	3.055205
MAMLD1	0.943503	1.22697	3.77316	0.0107956	0.0588217	-2.98629	1.0286590	0.4817834	1.6476031	1.7498444
ZNF589	0.943393	2.13132	5.01505	0.00306395	0.0317584	-1.59521	1.694531	1.624706	2.637896	2.568128
PHGR1	0.942594	0.471297	3.82108	0.0102404	0.0573855	-2.92821	0.0000000	0.0000000	1.2123238	0.6728651
KCNC4	0.941158	1.78732	3.88445	0.00955489	0.0550991	-2.85196	1.545357	1.088129	2.378552	2.137250
SFT2D2	0.940656	3.6909	3.15379	0.022061	0.090277	-3.7675	3.574189	2.866963	4.002094	4.320370
IRX5	0.940527	2.26499	4.22107	0.00668085	0.0454682	-2.45736	1.907276	1.682180	2.905982	2.564527
KIF21B	0.940056	3.51746	4.51566	0.00495202	0.039244	-2.12638	3.184718	2.910141	4.061939	3.913033
DGAT2	0.939299	1.88872	4.71268	0.00408112	0.0361172	-1.9124	1.343844	1.494297	2.451957	2.264780
ACCS	0.938705	3.53204	3.99764	0.00845569	0.0519613	-2.71732	3.296842	2.828524	4.047704	3.955071
RAB2B	0.937804	3.30131	4.33615	0.0059345	0.0430426	-2.32648	3.015118	2.649690	3.792553	3.747862
MIDN	0.937574	4.94589	3.5637	0.0136553	0.0673446	-3.24423	4.770595	4.183617	5.513241	5.316120
PLAGL2	0.936624	3.57703	1.92435	0.106828	0.244429	-5.42802	3.855921	2.361523	4.069022	4.021669
RASD1	0.935926	1.02668	4.97609	0.0031771	0.0319845	-1.63533	0.5797106	0.5377309	1.4503044	1.5389881
CARD6	0.935805	1.86402	4.54132	0.00482739	0.0389185	-2.09819	1.483993	1.308241	2.212535	2.451308
PXDN	0.935764	3.15026	4.67482	0.00423393	0.0365341	-1.95308	2.800401	2.564353	3.656021	3.580261
TRAF3	0.935537	3.64259	4.05173	0.0079814	0.0503036	-2.65367	3.402242	2.947409	4.125214	4.095510
TNFAIP2	0.935188	3.93098	4.95005	0.0032554	0.0323717	-1.66227	3.478809	3.447957	4.453740	4.343402
CADM4	0.934909	6.63737	3.10893	0.023287	0.0930316	-3.82616	5.786665	6.553162	7.191712	7.017933
IZUMO1R	0.934473	0.467236	4.67937	0.00421521	0.0364737	-1.94817	0.0000000	0.0000000	1.0563123	0.8126333
STAT3	0.934256	4.39893	4.82868	0.00365088	0.0344665	-1.78914	4.017845	3.845764	4.892312	4.839808
LYZ	0.93394	1.1686	4.90336	0.00340143	0.0330628	-1.71082	0.7459358	0.6573255	1.5813780	1.6897638
SPRYD4	0.933425	4.75823	3.52465	0.0142777	0.0690557	-3.29305	3.991595	4.591450	5.316743	5.133151
PLAUR	0.933346	5.75185	4.34076	0.00590659	0.0429656	-2.32127	5.452743	5.117614	6.284167	6.152882
SP8	0.933194	1.01562	4.91592	0.00336143	0.0328891	-1.69774	0.6130204	0.4850323	1.4938082	1.4706328
EPN3	0.93286	0.769993	4.88729	0.00345342	0.0333552	-1.72761	0.3704640	0.2366617	1.2655898	1.2072552
FBLIM1	0.932783	2.62009	4.3781	0.00568637	0.0419931	-2.27928	1.981747	2.325654	3.108828	3.064139
STK32B	0.931798	3.4985	4.65125	0.00433234	0.0368855	-1.9785	2.935699	3.129503	4.042841	3.885957
SPTBN1	0.931705	5.06265	2.777	0.0350713	0.120207	-4.26739	5.057971	4.135616	5.474991	5.582007
FAM122B	0.931516	3.05341	2.06213	0.0888573	0.216728	-5.24162	3.271218	1.904092	3.488896	3.549447
GJA5	0.931017	0.696198	4.78973	0.0037893	0.0351078	-1.83031	0.2797797	0.1815991	1.2432135	1.0801996
VAMP1	0.930528	2.04445	3.6038	0.0130477	0.0653878	-3.19433	1.874864	1.283514	2.547102	2.472332
ITIH5	0.930496	0.732391	4.95329	0.00324556	0.0323164	-1.65892	0.2302125	0.3040739	1.1692853	1.2259936
ZNF747	0.926791	1.44799	4.95595	0.00323748	0.032294	-1.65616	0.9619377	1.0072413	1.9392456	1.8835156
KSR1	0.9261	1.11781	4.29039	0.00621929	0.0440367	-2.37828	0.8356196	0.4739054	1.6067820	1.5549426
TICAM1	0.925382	4.55351	4.33079	0.00596705	0.0430867	-2.33253	4.243217	3.938421	5.103212	4.929189
ADAMTS15	0.925159	1.06121	4.74903	0.00394034	0.0354171	-1.87356	0.6790748	0.5181890	1.5789832	1.4685977
INSIG1	0.924977	3.59705	4.02818	0.00818412	0.0510937	-2.68133	3.350245	2.918870	3.997882	4.121187
PSPC1	0.924445	4.39253	4.96833	0.0032002	0.0320722	-1.64335	3.946072	3.914542	4.863377	4.846127
VWA1	0.923398	1.46127	4.68088	0.00420903	0.0364722	-1.94655	1.0850215	0.9141267	1.9928251	1.8531183
CNIH2	0.923044	1.6893	4.85203	0.00357069	0.0341217	-1.76456	1.182321	1.273242	2.201722	2.099929
LOC730183	0.922757	2.01374	2.18607	0.0753588	0.195237	-5.07264	2.1777364	0.9269956	2.5501193	2.4001276
ZNF703	0.922478	1.99045	3.4446	0.0156551	0.0727099	-3.39381	1.834897	1.223520	2.548200	2.355174
CLPS	0.921535	0.779678	4.50146	0.00502262	0.0395475	-2.14204	0.4580295	0.1797909	1.2073527	1.2735372
RAB3D	0.920501	1.63737	4.77483	0.00384381	0.0352424	-1.84612	1.094549	1.259698	2.120617	2.074634
KIAA1161	0.919174	1.00628	4.93645	0.0032972	0.0325541	-1.67639	0.5582720	0.5351058	1.4839331	1.4477918
HSPA6	0.91887	1.11655	4.88367	0.00346523	0.0333937	-1.73139	0.6073992	0.7068222	1.5737502	1.5782104
PVRIG	0.918869	1.37731	2.82723	0.0329302	0.115152	-4.19989	1.3607598	0.4749822	1.8210743	1.8524048
PCDHB10	0.917753	1.34521	3.56322	0.0136628	0.0673552	-3.24482	1.177331	0.595338	1.747305	1.860870
DHX58	0.917606	2.5961	3.9901	0.00852427	0.0521148	-2.72623	1.914331	2.360263	3.022579	3.087229
PNP	0.917025	5.64307	2.2977	0.0650318	0.178384	-4.91994	4.598138	5.770971	6.127479	6.075680
BMP7	0.916925	0.922071	4.59795	0.00456473	0.0378068	-2.0363	0.3849723	0.5422445	1.4719249	1.2891412
SYT5	0.91651	2.07676	4.68489	0.00419268	0.0364722	-1.94224	1.596709	1.640293	2.634650	2.435371
SLC30A1	0.915994	4.64587	4.88109	0.00347372	0.0334502	-1.73409	4.231952	4.143798	5.108911	5.098826
WBSCR27	0.915921	4.45371	3.65159	0.0123629	0.0633655	-3.13519	3.715729	4.275777	4.917656	4.905692
PROCA1	0.91537	1.31272	4.61625	0.00448338	0.0374835	-2.01641	0.9521167	0.7579532	1.8326415	1.7081690
CD70	0.915076	7.37275	2.61365	0.0431484	0.136681	-4.48841	6.430483	7.399935	7.921061	7.739509
CD33	0.914201	1.04087	4.56588	0.00471141	0.0384981	-2.07129	0.4926982	0.6748389	1.4135311	1.5824083
FAM20C	0.913411	3.8103	4.524	0.00491113	0.0391183	-2.11721	3.456033	3.251147	4.349423	4.184579
KEL	0.913109	0.6463	4.90304	0.00340246	0.0330628	-1.71116	0.1945707	0.1849202	1.1245356	1.0811729
ARHGAP1	0.912536	5.79831	3.24898	0.0196894	0.0840077	-3.64391	5.686713	4.997376	6.315867	6.193295
IL22RA1	0.911029	0.897209	4.8521	0.00357045	0.0341217	-1.76449	0.4144185	0.4689719	1.3891319	1.3163156
MOB3C	0.910939	4.37032	4.39221	0.00560557	0.0417253	-2.26346	3.768180	4.061526	4.870351	4.781233
CASP10	0.910653	1.51361	4.82143	0.00367621	0.0345418	-1.79679	1.001502	1.115056	1.971620	1.966244
FMNL3	0.910589	3.62256	4.78083	0.00382176	0.035168	-1.83975	3.228662	3.105865	4.111430	4.044277
FYN	0.909229	3.81194	4.37295	0.0057162	0.0420591	-2.28506	3.505230	3.209427	4.313707	4.219409
TBC1D10A	0.909087	3.42118	3.83656	0.010068	0.056743	-2.90954	2.728020	3.205255	3.928863	3.822586
GUCD1	0.908959	4.90109	3.61436	0.0128927	0.064987	-3.18123	4.176404	4.716809	5.435259	5.275872
GPRIN1	0.908292	2.33359	4.46778	0.00519464	0.0402246	-2.17928	1.751153	2.007734	2.836625	2.738846
FAM65A	0.908165	4.73926	1.75953	0.133244	0.280246	-5.6476	5.084120	3.486243	5.238388	5.148305
SERTAD1	0.908018	6.23748	2.24163	0.0700192	0.186271	-4.99667	5.188441	6.378499	6.752640	6.630336
TNKS1BP1	0.907927	5.14697	4.8298	0.00364699	0.0344665	-1.78796	4.721894	4.664129	5.639260	5.562616
SAP130	0.907458	3.04483	3.42758	0.0159668	0.0737391	-3.41536	2.904563	2.277630	3.501802	3.495307
LYNX1	0.907217	0.864584	4.63404	0.00440587	0.037158	-1.99712	0.5125255	0.3094253	1.3337794	1.3026054
LRP4	0.906699	1.64726	4.73124	0.00400856	0.0357971	-1.89255	1.271733	1.116085	2.109519	2.091698
PLEKHG2	0.906351	3.24892	2.1547	0.0785598	0.200674	-5.11549	3.422482	2.169010	3.724341	3.679852
KPRP	0.905561	0.716622	4.45714	0.00525033	0.0403985	-2.19107	0.2965967	0.2310862	1.3021903	1.0366153
SLC16A6	0.903821	1.33911	3.78836	0.0106159	0.0584906	-2.96783	1.0784286	0.6959796	1.6318763	1.9501738
CIC	0.903553	4.48201	1.7093	0.142523	0.292407	-5.7135	4.850705	3.209771	4.989787	4.877795
THAP8	0.902409	2.024	4.72962	0.00401482	0.035828	-1.89428	1.553658	1.591930	2.545066	2.405340
AP3B2	0.902206	1.31449	4.75308	0.00392502	0.0353852	-1.86925	0.8030058	0.9237643	1.7417800	1.7894017
ANKFN1	0.902175	1.16165	4.30376	0.00613448	0.0438746	-2.36311	0.8684230	0.5526996	1.5789481	1.6465242
C1orf122	0.90162	5.0635	2.14709	0.0793584	0.202222	-5.12589	4.021333	5.204041	5.719107	5.309507
GATSL3	0.901183	1.20751	4.36435	0.00576635	0.0422822	-2.29471	0.6603853	0.8534492	1.7727225	1.5434773
TUBB4B	0.900199	8.77939	2.54631	0.0470448	0.145141	-4.58006	7.836253	8.822329	9.311660	9.147321
NUMB	0.900037	4.43129	3.82725	0.0101713	0.0571618	-2.92077	4.202727	3.759821	4.789717	4.972904
PTMS	0.899868	3.82687	2.6385	0.0417995	0.133902	-4.45466	2.971419	3.782450	4.524720	4.028885
TESK2	0.899573	1.92452	4.22951	0.00662262	0.0453131	-2.44769	1.302674	1.646800	2.379830	2.368791
SNPH	0.898931	2.3283	4.21662	0.00671178	0.0455462	-2.46246	1.713942	2.043732	2.832824	2.722712
ACP2	0.898574	4.62384	4.76154	0.00389319	0.0352889	-1.86024	4.134936	4.214173	5.111770	5.034487
FLYWCH1	0.898152	4.46699	4.74772	0.00394532	0.0354171	-1.87496	3.968599	4.067235	4.949401	4.882738
LAMP3	0.898056	1.26733	2.60474	0.0436435	0.137738	-4.50052	1.300769	0.335836	1.702683	1.730036
SNCG	0.897954	2.52483	4.45016	0.00528729	0.0405116	-2.19883	2.206709	1.944993	2.978982	2.968629
CFL1	0.89768	10.2151	4.61663	0.00448172	0.0374835	-2.016	9.833290	9.699256	10.732027	10.595879
SLC24A3	0.897009	3.25468	4.75502	0.00391769	0.035356	-1.86718	2.778143	2.834207	3.750126	3.656242
ELMO1	0.896413	1.69266	3.55363	0.0138129	0.0676036	-3.25679	1.5271843	0.9617241	2.1630469	2.1186872
NOV	0.89587	2.37684	3.38553	0.0167668	0.0758989	-3.46876	2.231540	1.626277	2.744225	2.905332
MESDC1	0.895663	4.62727	4.47977	0.00513262	0.0399246	-2.166	4.239175	4.119711	5.182511	4.967701
ZNF575	0.895417	1.65212	4.15973	0.00712196	0.0470918	-2.52796	1.356258	1.052567	2.197883	2.001776
NR2F2	0.895364	4.74721	2.27962	0.0665976	0.181087	-4.94468	4.874295	3.724766	5.213461	5.176329
PTK7	0.894478	3.27549	4.68831	0.00417874	0.0364602	-1.93856	2.803396	2.853115	3.790689	3.654777
ICOSLG	0.893577	0.91172	4.1203	0.00742295	0.0480631	-2.57364	0.6282024	0.3016608	1.4476117	1.2694062
XDH	0.893529	1.93648	4.70464	0.00411304	0.0362526	-1.92103	1.534160	1.445272	2.431747	2.334741
EHD2	0.892398	4.45035	3.23401	0.0200429	0.0847889	-3.66327	4.332661	3.675645	4.980577	4.812526
CDH3	0.892268	0.627199	4.7682	0.00386836	0.0352889	-1.85316	0.1756648	0.1864661	1.1105832	1.0360831
PCDHA7	0.89099	1.73198	4.47509	0.00515675	0.0400149	-2.17118	1.209110	1.363867	2.268012	2.086945
SFN	0.890267	2.87061	2.75242	0.0361738	0.122416	-4.30051	1.989743	2.861214	3.376899	3.254593
SOX15	0.89016	2.56388	3.85535	0.00986305	0.0560074	-2.88691	2.324920	1.912672	3.106118	2.911793
SHROOM4	0.889432	2.42371	3.84993	0.00992172	0.0562407	-2.89343	2.207249	1.750744	2.866914	2.869943
SEL1L3	0.888877	3.54614	4.23754	0.00656776	0.0450883	-2.4385	3.248204	2.955191	3.921600	4.059550
ETV5	0.887132	4.78098	2.35982	0.05994	0.169658	-4.83489	4.875808	3.799017	5.295879	5.153210
BAX	0.886831	7.00098	4.25536	0.00644784	0.0448369	-2.41815	6.421900	6.693231	7.523435	7.365358
FGFBP2	0.886779	0.633256	4.43344	0.00537695	0.0407769	-2.21742	0.2756799	0.1040537	0.9881346	1.1651569
PLBD2	0.885401	4.09571	3.65825	0.0122707	0.0630813	-3.12697	3.909365	3.396653	4.565894	4.510926
ABCD1	0.885298	3.84949	4.682	0.00420446	0.0364722	-1.94535	3.407824	3.405850	4.350857	4.233413
MLLT11	0.88514	5.95605	4.76153	0.00389325	0.0352889	-1.86026	5.517447	5.509516	6.387254	6.409988
CHAMP1	0.884508	4.98091	1.69129	0.146004	0.2966	-5.737	5.350777	3.726542	5.402771	5.443563
TUBB2A	0.88447	4.09599	3.06446	0.0245769	0.0961302	-3.88455	3.308626	3.998886	4.663249	4.413203
BAIAP2L1	0.88429	3.37304	3.65311	0.0123417	0.0633077	-3.13331	3.187830	2.673958	3.837685	3.792682
CSPG4	0.883875	7.51531	3.94307	0.00896666	0.0531847	-2.78198	7.271946	6.874807	8.020820	7.893683
RPS27L	0.883631	3.26299	4.49322	0.00506409	0.0396217	-2.15113	2.714105	2.928244	3.697596	3.712014
AHDC1	0.883392	3.16323	2.95403	0.0281337	0.104597	-4.03057	3.094414	2.348658	3.717282	3.492574
C4orf48	0.882591	5.87305	1.86676	0.115398	0.256914	-5.50525	4.723868	6.139651	6.458743	6.169957
ACHE	0.88043	1.53333	4.59235	0.00458998	0.0379423	-2.0424	1.170867	1.015362	1.960484	1.986604
RHPN1	0.880213	4.04258	3.0919	0.0237718	0.0942323	-3.84849	3.958456	3.246490	4.440416	4.524955
ABHD17C	0.879875	5.27395	2.66257	0.0405366	0.131602	-4.42201	5.287784	4.380249	5.732920	5.694863
ENDOD1	0.879681	4.03096	3.90045	0.00939014	0.0545575	-2.83281	3.801308	3.380926	4.439223	4.502373
FAM171A2	0.878631	1.19316	4.09949	0.0075876	0.0487835	-2.59785	0.8929446	0.6147388	1.7430020	1.5219430
MAMSTR	0.878133	0.972486	3.96671	0.00874112	0.052607	-2.75391	0.3440209	0.7228174	1.4761663	1.3469385
MSX2	0.878126	2.62036	3.90891	0.0093043	0.0544048	-2.8227	2.370838	1.991748	3.149686	2.969151
AFF1	0.87799	2.38811	1.61136	0.162481	0.317804	-5.84028	2.792280	1.105958	2.710508	2.943708
SEMA5A	0.877844	0.787804	4.3645	0.00576552	0.0422822	-2.29455	0.4344807	0.2632832	1.1313148	1.3221367
C1orf198	0.877815	4.20034	4.63558	0.00439926	0.037158	-1.99545	3.756140	3.766729	4.700185	4.578313
SEPHS2	0.877803	7.40527	3.15218	0.0221037	0.0903236	-3.7696	6.631072	7.301666	7.924368	7.763975
RAB38	0.877371	5.88275	3.6282	0.0126929	0.0643091	-3.16409	5.186868	5.701261	6.314722	6.328149
ANKRD9	0.877308	2.56534	3.467	0.0152553	0.0717196	-3.36552	2.369339	1.884025	3.154494	2.853486
UBQLN2	0.877307	4.25122	1.99336	0.0974035	0.229942	-5.33491	4.475011	3.150117	4.662515	4.717229
GLTSCR1	0.876055	2.66575	1.83047	0.121151	0.264818	-5.55364	2.954862	1.500581	3.195786	3.011768
C1orf226	0.875773	2.4565	3.62033	0.0128062	0.0646018	-3.17384	2.275248	1.761982	2.873234	2.915543
TMEM121	0.875604	3.52878	3.05578	0.0248375	0.096836	-3.89597	2.740621	3.441335	4.059797	3.873367
SDR42E1	0.874595	0.839639	4.51421	0.00495921	0.039244	-2.12799	0.3411092	0.4635738	1.3449302	1.2089434
FMO4	0.874512	0.932157	4.08493	0.0077053	0.049201	-2.61484	0.5661132	0.4236890	1.2075295	1.5312972
NPTX2	0.874231	1.61561	3.8467	0.00995685	0.0563898	-2.89732	0.9887427	1.3682388	2.1592192	1.9462233
PLTP	0.873814	6.85493	3.51026	0.0145148	0.0697366	-3.31108	6.150968	6.685083	7.359006	7.224672
FAM168A	0.873667	4.27792	3.09481	0.0236881	0.0941341	-3.84467	4.188101	3.494068	4.780776	4.648727
ZP4	0.873399	0.461706	4.68608	0.0041878	0.0364638	-1.94096	0.00000000	0.05001338	0.90293155	0.89387900
LIPH	0.872843	0.482721	4.57044	0.00469023	0.0384166	-2.06631	0.09259826	0.00000000	0.97649581	0.86178837
PDE4C	0.872835	0.600212	4.65408	0.00432039	0.0368819	-1.97544	0.1635719	0.1640162	1.0795693	0.9936887
MAT1A	0.872203	0.540686	4.54512	0.00480925	0.0388998	-2.09402	0.06797645	0.14119208	0.90559034	1.04798483
FLRT1	0.871159	2.48804	4.36967	0.00573524	0.0421265	-2.28874	1.940398	2.164525	2.967401	2.879840
PRUNE	0.870831	3.68634	4.14084	0.00726435	0.0474612	-2.54981	3.391713	3.110141	4.205586	4.037928
CARHSP1	0.870293	3.0048	4.14051	0.00726689	0.0474612	-2.55019	2.448547	2.690758	3.549718	3.330171
CBL	0.866741	3.9241	1.58842	0.167533	0.323558	-5.8696	4.343134	2.638321	4.340599	4.374338
EPHB3	0.866737	2.11161	4.53063	0.00487887	0.0390921	-2.10992	1.728085	1.628407	2.602410	2.487557
SLC34A3	0.866443	1.50783	1.79274	0.12744	0.272466	-5.60374	1.8099004	0.3393118	1.8458660	2.0362313
ACY3	0.866303	0.433151	4.54408	0.00481417	0.038915	-2.09515	0.0000000	0.0000000	0.7950038	0.9376015
EHBP1L1	0.86606	5.38859	4.5042	0.0050089	0.039515	-2.13901	5.014505	4.896610	5.879381	5.763854
AATK	0.865105	1.25244	3.17024	0.0216295	0.0892539	-3.74606	1.1293066	0.5104712	1.8058386	1.5641489
YLPM1	0.864997	3.56543	1.50944	0.186115	0.346641	-5.96933	4.033440	2.232425	4.022443	3.973417
FBXL8	0.864742	2.42091	3.00469	0.026436	0.100704	-3.9634	2.353717	1.623367	2.844355	2.862214
NID1	0.86413	5.00499	2.12725	0.0814783	0.20539	-5.15296	5.170147	3.975703	5.497878	5.376232
LZTS1	0.863682	1.25806	4.63481	0.00440255	0.037158	-1.99628	0.8410485	0.8113798	1.7096495	1.6701435
FAM19A3	0.863623	1.55643	4.29507	0.00618941	0.0439735	-2.37296	1.247678	1.001559	1.953315	2.023168
DCD	0.863377	1.19829	3.56048	0.0137055	0.0674617	-3.24824	0.5465526	0.9866433	1.4933375	1.7666127
GPR157	0.863352	1.67894	3.73352	0.0112806	0.0601571	-3.03459	1.398707	1.095824	2.282212	1.939023
PELI3	0.862911	2.63898	4.12725	0.00736884	0.0479101	-2.56557	2.049283	2.365759	3.090143	3.050721
YPEL2	0.862586	1.39679	2.7538	0.0361109	0.122295	-4.29865	1.3761116	0.5548763	1.7441681	1.9119914
BACE1	0.862559	5.13657	3.14219	0.0223709	0.0909343	-3.78264	5.037082	4.373497	5.619941	5.515757
MAN2B2	0.862223	3.02972	3.34192	0.0176441	0.0785334	-3.52441	2.891806	2.305403	3.511433	3.410221
CYP2J2	0.861258	1.86201	4.50946	0.00498273	0.0393336	-2.13322	1.384290	1.478467	2.349469	2.235803
FOXM1	0.860925	3.42118	2.86779	0.0313048	0.111667	-4.14554	3.382372	2.599058	3.865150	3.838130
ABTB1	0.860805	3.7453	4.06714	0.00785186	0.0498064	-2.63562	3.152680	3.477121	4.221539	4.129871
PRDX1	0.860546	7.38307	3.05545	0.0248476	0.0968458	-3.89641	6.603551	7.302038	7.855585	7.771095
PDGFRB	0.86014	1.5497	4.37554	0.00570115	0.0419967	-2.28214	1.018694	1.220557	2.015009	1.944521
CHSY1	0.860001	4.46988	1.97782	0.099449	0.233178	-5.35592	4.692860	3.386900	4.879457	4.920306
FAM25A	0.859592	0.429796	4.46888	0.00518892	0.0402157	-2.17806	0.0000000	0.0000000	0.9425888	0.7765951
KCNN1	0.859134	0.893663	4.48169	0.0051228	0.039874	-2.16388	0.5180519	0.4101398	1.3805520	1.2659075
UCN	0.858963	3.71839	3.64484	0.0124571	0.0635933	-3.14352	3.460452	3.117355	4.317135	3.978599
COL4A6	0.858816	0.526502	4.60604	0.00452856	0.0376292	-2.0275	0.12300363	0.07118343	0.96295009	0.94886886
TRIM56	0.858798	4.03223	1.91	0.108901	0.247402	-5.44731	4.281597	2.924060	4.508983	4.414268
RNASEK	0.858774	1.44035	3.76536	0.0108892	0.0591048	-2.99577	1.2109274	0.8109904	1.9612199	1.7782460
RAP1GAP	0.857936	1.38336	4.42551	0.00542007	0.0408197	-2.22625	0.9496811	0.9590949	1.7202523	1.9043955
SLC9A3R1	0.857712	4.22694	3.94297	0.00896763	0.0531847	-2.7821	3.634738	3.961429	4.749088	4.562504
ACACB	0.857534	0.841813	4.56932	0.00469543	0.0384166	-2.06753	0.4560451	0.3700463	1.2819879	1.2591715
COL6A1	0.857462	5.55616	4.55048	0.00478373	0.0387485	-2.08814	5.106199	5.148661	6.033045	5.936740
EMP2	0.856823	3.5583	4.18891	0.0069081	0.0462345	-2.4943	3.255276	3.004491	4.054011	3.919403
FRMD4A	0.856315	2.80661	3.74286	0.0111642	0.0599127	-3.02319	2.592971	2.163937	3.291696	3.177841
CLPSL1	0.85589	1.92031	4.24431	0.00652188	0.0449983	-2.43076	1.394768	1.589968	2.434779	2.261736
MICALL1	0.855713	6.12663	2.80418	0.0338945	0.117433	-4.23084	6.097106	5.300447	6.610959	6.498021
SORL1	0.855654	0.655923	4.31825	0.00604409	0.0434957	-2.3467	0.3350970	0.1210958	1.0426322	1.1248676
SUSD4	0.855652	0.664431	4.49288	0.0050658	0.0396217	-2.15151	0.1893862	0.2838233	1.0408206	1.1436924
CNIH3	0.855564	2.0326	4.23952	0.00655428	0.0450865	-2.43623	1.476653	1.732989	2.487825	2.432945
RNF144A	0.85477	3.64047	3.91332	0.00925996	0.0541853	-2.81744	3.400654	3.025518	4.103670	4.032041
OLAH	0.854302	0.565486	4.2034	0.00680465	0.0458558	-2.47764	0.20958113	0.06708866	0.87555582	1.10971793
DCPS	0.853995	5.20393	3.30325	0.018465	0.0803166	-3.574	4.481748	5.072112	5.677310	5.584539
SSBP3	0.853552	2.45635	4.59492	0.00457839	0.0378954	-2.03961	2.029407	2.029750	2.885829	2.880431
DGKA	0.853394	4.99789	4.05618	0.00794375	0.0501901	-2.64846	4.733341	4.409042	5.450299	5.398872
SDC2	0.852527	2.80812	4.23849	0.0065613	0.0450865	-2.43742	2.509570	2.254150	3.245698	3.223076
KMT2D	0.851968	4.15094	1.33742	0.233527	0.399725	-6.17879	4.737372	2.712548	4.593193	4.560664
TMEM175	0.851049	3.8708	3.89582	0.00943755	0.0547583	-2.83836	3.256490	3.634053	4.325603	4.267038
UNKL	0.850689	2.75977	3.88365	0.00956326	0.0550991	-2.85293	2.521684	2.147176	3.231449	3.138789
FGFR3	0.850509	1.49353	4.41061	0.00550224	0.0411718	-2.24289	1.119679	1.016869	1.987765	1.849801
MSX1	0.849834	4.17314	3.17987	0.0213814	0.0885157	-3.73353	3.442551	4.053903	4.690315	4.505808
TMEM8B	0.848244	1.72156	2.90686	0.0298223	0.108128	-4.09336	1.6466799	0.9481923	2.2793958	2.0119633
TCP11L1	0.848236	3.14619	2.87391	0.0310673	0.111099	-4.13735	3.103064	2.341089	3.581105	3.559519
RNF19B	0.84805	4.97956	3.78058	0.0107075	0.0586615	-2.97728	4.352502	4.758577	5.453015	5.354164
SLC45A1	0.847046	1.08912	4.55871	0.00474494	0.038624	-2.07913	0.6639059	0.6672838	1.5052844	1.5199980
TAF10	0.846994	3.18583	1.8547	0.11728	0.259476	-5.52136	2.089216	3.435452	3.775173	3.443482
MAP3K6	0.846634	2.48661	4.34723	0.00586777	0.0427642	-2.31399	1.993262	2.133316	2.977392	2.842455
ZFP36L2	0.846176	4.45837	1.69505	0.145269	0.295662	-5.73209	4.804759	3.265804	4.908802	4.854114
FYB	0.845278	0.577779	4.36188	0.00578087	0.0423453	-2.29749	0.21152652	0.09875393	0.92802392	1.07281205
CYBA	0.844886	5.26256	1.35704	0.227603	0.393747	-6.15551	3.857574	5.822654	5.783336	5.586664
GGT1	0.844391	1.03587	4.14344	0.00724462	0.0474612	-2.54681	0.4841167	0.7432368	1.5092111	1.4069250
FDX1	0.843284	2.1471	4.42402	0.00542822	0.0408347	-2.22791	1.775595	1.675314	2.619121	2.518354
ROBO4	0.843116	5.00906	3.97082	0.00870261	0.0525054	-2.74905	4.417094	4.757910	5.443770	5.417467
NAV1	0.842735	2.87535	1.78953	0.12799	0.273382	-5.60799	3.169964	1.737994	3.363501	3.229928
STOM	0.842517	5.8283	2.38735	0.0578205	0.165379	-4.79721	5.905176	4.908902	6.227549	6.271564
PIK3CD	0.841554	4.08635	4.48836	0.00508875	0.0397526	-2.1565	3.653156	3.677988	4.547667	4.466585
TMEM51	0.84146	1.9497	3.46954	0.0152105	0.071648	-3.36231	1.281858	1.776075	2.448393	2.292460
NATD1	0.841071	3.23406	4.3594	0.00579549	0.0423986	-2.30029	2.859783	2.767275	3.727868	3.581331
ATXN2L	0.841054	6.81226	1.90797	0.109198	0.247759	-5.45003	7.054410	5.729051	7.278995	7.186574
NFIC	0.840588	4.13778	1.5704	0.17161	0.328378	-5.89253	4.549019	2.885945	4.624506	4.491634
PLPPR2	0.839714	4.63765	3.01901	0.0259769	0.0996678	-3.94447	4.557593	3.877988	5.111156	5.003852
LRRC4B	0.838516	3.44803	4.25878	0.00642507	0.0447509	-2.41424	3.021567	3.035971	3.975529	3.759043
CYP2S1	0.838273	1.28586	4.48165	0.00512301	0.039874	-2.16392	0.8332703	0.9001672	1.6904279	1.7195553
ATP6V1E2	0.837686	2.62489	4.41895	0.00545608	0.0409462	-2.23357	2.186943	2.225158	3.103631	2.983841
WNT5A	0.837485	2.4584	2.88631	0.0305924	0.109892	-4.12079	2.406065	1.673255	2.822858	2.931432
LOC728392	0.837347	2.14743	4.02459	0.00821548	0.0512236	-2.68555	1.740066	1.717451	2.721433	2.410778
LZTS3	0.836473	2.22289	3.85051	0.00991535	0.0562407	-2.89273	1.620495	1.988817	2.674577	2.607682
SYNJ2	0.836329	3.49461	2.67249	0.0400279	0.130547	-4.40857	3.493850	2.659041	3.882555	3.942995
HLA.DQB2	0.836167	0.843996	4.42062	0.00544689	0.0409253	-2.23171	0.3681713	0.4836529	1.2756532	1.2485051
SUSD6	0.836152	3.62747	4.387	0.00563529	0.0417887	-2.2693	3.273396	3.145386	4.076172	4.014914
PNPLA2	0.835495	5.75907	4.26722	0.00636937	0.0446065	-2.40462	5.378201	5.304443	6.272830	6.080804
THEMIS2	0.83536	1.19691	4.42738	0.00540989	0.0408176	-2.22417	0.7601176	0.7983394	1.5629978	1.6661784
HTATIP2	0.834924	2.28073	4.26058	0.00641319	0.0447509	-2.4122	1.777360	1.949176	2.756360	2.640023
FAM160A1	0.834175	1.47604	3.24064	0.0198855	0.0844556	-3.65469	1.3462930	0.7716097	1.8215630	1.9646903
PLXND1	0.833638	3.0337	4.20126	0.00681981	0.0458567	-2.48009	2.703057	2.530708	3.528095	3.372947
ASTN1	0.833485	1.98799	4.33353	0.00595036	0.043049	-2.32943	1.648816	1.493685	2.433963	2.375509
KIAA1324	0.832626	0.769233	4.4234	0.00543164	0.0408347	-2.22861	0.3400602	0.3657800	1.2344828	1.1366090
CMIP	0.832284	2.5732	2.15011	0.0790402	0.201508	-5.12176	2.721340	1.592772	2.996403	2.982278
DMRT2	0.831971	2.28748	4.06253	0.00789036	0.0499267	-2.64102	1.781211	1.961773	2.814730	2.592196
LAMC1	0.831403	7.23933	3.70721	0.0116161	0.0612565	-3.06679	7.032343	6.614909	7.661453	7.648605
PTPRE	0.831354	0.752462	4.26241	0.00640108	0.0447306	-2.41011	0.4320624	0.2415086	1.1418538	1.1944252
PTPN23	0.830568	5.13837	1.57351	0.170898	0.327408	-5.88857	5.542328	3.903842	5.607546	5.499760
SETD1B	0.830103	3.17485	1.42457	0.208255	0.373097	-6.07412	3.677529	1.842076	3.581435	3.598377
CREBBP	0.830006	3.46846	1.32648	0.236892	0.402949	-6.1917	4.045529	2.061389	3.923853	3.843077
FAM78B	0.829311	2.81589	4.19647	0.00685389	0.045961	-2.4856	2.391492	2.410981	3.342211	3.118885
ARHGEF40	0.82799	3.30518	4.22029	0.00668628	0.0454809	-2.45826	2.786258	2.996119	3.719030	3.719326
HHAT	0.827604	4.70561	3.91641	0.00922899	0.0541129	-2.81375	4.125291	4.458327	5.136751	5.102076
ACAA1	0.826204	3.72434	3.12678	0.0227902	0.0919498	-3.80279	3.006658	3.615820	4.206339	4.068548
CYP27C1	0.826015	1.0872	3.88538	0.00954527	0.0550991	-2.85086	0.8324257	0.5159610	1.4332148	1.5672025
LGR6	0.825706	0.570222	4.43008	0.00539519	0.0408005	-2.22116	0.1826521	0.1320863	0.9796560	0.9864954
PANX1	0.825518	3.92942	4.31078	0.00609049	0.0437066	-2.35516	3.586769	3.446546	4.309433	4.374918
SHANK3	0.825262	0.811336	3.59926	0.013115	0.0655905	-3.19997	0.6129675	0.1844418	1.2870753	1.1608577
TCIRG1	0.824349	4.07203	4.35095	0.00584559	0.0426431	-2.3098	3.706381	3.613334	4.525206	4.443207
CCNF	0.823795	2.89947	3.98321	0.00858749	0.0521695	-2.73437	2.608300	2.366839	3.402235	3.220496
AARD	0.821532	1.0573	3.27224	0.0191539	0.0824992	-3.61389	0.8153813	0.4776958	1.6922663	1.2438749
CCDC69	0.821488	1.13522	3.00751	0.026345	0.100477	-3.95967	0.4461197	1.0028296	1.7283286	1.3635975
LOC391322	0.820922	3.1334	1.77216	0.131006	0.277506	-5.63094	3.408358	2.037525	3.709556	3.378172
CYFIP2	0.82086	3.79098	4.4114	0.0054978	0.0411718	-2.24199	3.398425	3.362667	4.197819	4.204993
AGPAT1	0.820142	3.88831	3.35293	0.017418	0.077862	-3.51035	3.735619	3.220852	4.359118	4.237638
SH3RF1	0.819475	3.70024	2.45422	0.0529967	0.155958	-4.70576	3.749560	2.831438	4.067001	4.152947
SPSB1	0.819424	3.32087	3.33823	0.0177207	0.0787282	-3.52914	2.650215	3.172102	3.785447	3.675717
PHYH	0.818947	2.35483	3.9958	0.00847233	0.0520135	-2.71949	1.805239	2.085482	2.797148	2.731466
FAM89B	0.81864	5.89563	2.86196	0.0315331	0.112262	-4.15334	5.130598	5.842025	6.369127	6.240775
GRN	0.818627	6.04682	3.15471	0.0220366	0.0902352	-3.76631	5.354344	5.920675	6.558495	6.353778
CATIP	0.817888	0.472856	4.30478	0.0061281	0.0438704	-2.36196	0.1278250	0.0000000	0.8996047	0.8639957
ABHD3	0.817856	1.3256	3.988	0.00854351	0.0521148	-2.72871	1.0112234	0.8221268	1.6253635	1.8436980
PITPNC1	0.817794	3.0991	3.60682	0.0130032	0.0653377	-3.19058	2.482773	2.897625	3.568431	3.447554
DCUN1D3	0.81764	3.20026	3.79182	0.0105755	0.0583759	-2.96364	2.973377	2.609504	3.613033	3.605127
IER5	0.816288	6.96034	3.20949	0.0206371	0.0864704	-3.69504	6.275753	6.828637	7.451678	7.285288
LAT2	0.816204	3.71982	2.52139	0.0485812	0.147813	-4.61403	2.873582	3.749852	4.173887	4.081955
STAT6	0.815747	5.20758	2.87245	0.0311241	0.111121	-4.13931	4.443938	5.155474	5.644632	5.586275
PTGFRN	0.81467	4.47386	3.94508	0.00894723	0.0531184	-2.77959	4.209885	3.923171	4.925052	4.837343
SUOX	0.814633	3.66939	3.31936	0.0181181	0.0794782	-3.55332	3.024831	3.499318	4.198168	3.955248
GLI4	0.814345	4.45515	4.17326	0.00702189	0.0466715	-2.51234	4.139556	3.956391	4.900778	4.823859
IL11RA	0.814065	3.21995	4.11587	0.00745764	0.0481415	-2.57879	2.733386	2.892444	3.707102	3.546857
VEGFC	0.813746	3.01507	2.99105	0.0268819	0.101706	-3.98146	2.925815	2.290572	3.512613	3.331266
NPR2	0.813467	2.87195	3.94955	0.00890418	0.052951	-2.77428	2.604091	2.326350	3.329445	3.227930
PCDHA5	0.813466	1.21767	3.86997	0.00970687	0.0554585	-2.86934	0.9646400	0.6572263	1.6800991	1.5686997
PIP5K1C	0.813223	3.44481	2.96548	0.0277399	0.103634	-4.01537	3.370020	2.706383	3.899114	3.803735
SCN1B	0.813052	1.0034	4.31464	0.00606644	0.0435599	-2.35078	0.6221747	0.5715784	1.4561516	1.3637053
N4BP3	0.811832	0.555976	4.22862	0.00662869	0.0453206	-2.4487	0.1593591	0.1407599	1.0419774	0.8818059
SPARC	0.811652	8.8737	2.94514	0.0284436	0.105221	-4.04238	8.137616	8.798135	9.352815	9.206239
METTL7B	0.811561	3.85703	2.69413	0.0389425	0.128185	-4.37927	3.061436	3.841056	4.320551	4.205064
C1S	0.81146	0.785654	4.36482	0.0057636	0.0422822	-2.29419	0.3693224	0.3905255	1.1983073	1.1844612
IP6K2	0.810762	4.41513	4.29384	0.00619724	0.0439791	-2.37435	3.970949	4.048550	4.861332	4.779690
ARID3A	0.810393	2.01047	4.15403	0.0071646	0.0471786	-2.53455	1.585245	1.625294	2.512687	2.318638
STAT2	0.810367	4.31316	3.74168	0.0111789	0.0599127	-3.02464	4.085318	3.730638	4.771221	4.665469
RNF144B	0.810159	0.966382	3.90539	0.00933997	0.0544462	-2.82691	0.7106820	0.4119223	1.3362604	1.4066625
NLRX1	0.809768	4.27911	3.48323	0.0149726	0.0708359	-3.34506	3.649862	4.098597	4.744138	4.623858
SLC44A2	0.808344	4.70275	4.26317	0.00639606	0.04472	-2.40924	4.255977	4.341180	5.153656	5.060189
PLEKHH3	0.808238	3.16817	3.42862	0.0159476	0.0737034	-3.41404	2.993414	2.534681	3.646849	3.497722
TFAP2A	0.808038	2.34681	2.30249	0.064623	0.177835	-4.91337	2.436977	1.448603	2.774901	2.726755
ABHD1	0.807768	1.33149	4.25132	0.00647476	0.044918	-2.42275	0.9722806	0.8829292	1.7845118	1.6862333
PSAT1	0.807627	7.38633	4.18302	0.00695069	0.0464639	-2.50108	7.057862	6.907168	7.834636	7.745648
NPPC	0.807595	0.688316	2.85439	0.031832	0.112735	-4.16348	0.2763232	0.2927145	1.4466512	0.7375765
ADGRB2	0.80647	2.13835	3.95045	0.00889554	0.052951	-2.77321	1.875837	1.594394	2.541606	2.541565
TLCD1	0.806422	5.93989	2.25835	0.0684906	0.184197	-4.97379	5.036320	6.037043	6.423411	6.262796
TMEM184B	0.80571	2.82748	2.42341	0.0551641	0.160509	-4.74789	2.882098	1.967158	3.256142	3.204535
ZYX	0.80557	6.31714	2.25121	0.0691388	0.185228	-4.98356	6.413606	5.415109	6.815059	6.624795
ITM2A	0.805538	2.18596	3.19283	0.0210522	0.0874969	-3.71668	1.547960	2.018420	2.430124	2.747332
RGMA	0.805357	0.760983	3.99423	0.00848656	0.0520509	-2.72134	0.4845679	0.2320415	1.1959193	1.1314035
NEIL3	0.804615	1.97417	3.56886	0.0135753	0.0671052	-3.23779	1.686477	1.457240	2.197752	2.555194
ZNF628	0.804527	2.25448	2.22547	0.0715299	0.188712	-5.01878	2.367177	1.337249	2.676790	2.636689
PRSS3	0.803832	0.782567	3.51099	0.0145028	0.0697227	-3.31018	0.1801555	0.5811461	1.0882339	1.2807319
RNF34	0.803815	3.96235	4.08164	0.00773213	0.0493159	-2.61867	3.645894	3.474983	4.431430	4.297077
LRFN3	0.801784	2.70727	2.62055	0.042769	0.136017	-4.47903	2.691618	1.921139	3.229820	2.986505
HIST1H1D	0.801367	1.71876	3.59314	0.0132063	0.0659094	-3.20758	1.148590	1.487573	2.234971	2.003925
KIAA0513	0.800988	2.26995	4.3044	0.00613047	0.0438704	-2.36238	1.878907	1.860012	2.686347	2.654548
SERPINF2	0.800436	1.39169	3.77988	0.0107158	0.0586615	-2.97813	0.8509896	1.1319504	1.6980220	1.8857894
TRIM62	0.799829	3.14049	3.75101	0.0110637	0.0596722	-3.01325	2.891818	2.589339	3.626421	3.454394
FECH	0.79856	2.65391	4.26819	0.006363	0.0445995	-2.40352	2.223713	2.285543	3.032535	3.073840
AEBP1	0.798313	5.46502	3.09063	0.0238085	0.0943467	-3.85016	5.355528	4.776190	5.935213	5.793131
ELMOD1	0.798241	1.09011	3.87324	0.00967236	0.0553919	-2.86542	0.7942363	0.5877470	1.3827126	1.5957526
SEC16A	0.797525	4.26679	2.04142	0.0913466	0.220862	-5.26976	4.437796	3.298252	4.704530	4.626568
NHSL1	0.797362	2.55704	1.84846	0.118264	0.260886	-5.52968	2.802093	1.514634	3.020082	2.891370
ZNF316	0.797301	3.504	2.24833	0.0694022	0.185488	-4.9875	3.600059	2.610645	3.987689	3.817618
ZSWIM3	0.796535	2.91521	3.27048	0.0191938	0.0825877	-3.61616	2.257654	2.776228	3.349357	3.277596
ABCC5	0.796359	2.76501	2.94845	0.0283278	0.105022	-4.03798	2.691984	2.041674	3.142310	3.184065
WNK4	0.795871	4.80486	3.09346	0.0237269	0.0941711	-3.84644	4.695606	4.118247	5.267287	5.138309
DOT1L	0.795442	3.9829	1.94933	0.103313	0.238823	-5.39438	4.188635	2.981720	4.399296	4.361943
VMAC	0.795217	3.28357	4.13847	0.00728248	0.0474802	-2.55256	2.925672	2.846255	3.752602	3.609758
CHST14	0.793786	5.18299	3.55937	0.0137229	0.0675213	-3.24963	4.619838	4.952365	5.699940	5.459835
FLG	0.793593	2.5998	1.97669	0.099599	0.233359	-5.35745	2.793744	1.612259	2.968031	3.025158
PKD1	0.793254	3.85331	1.25292	0.260672	0.427664	-6.27703	4.461373	2.452000	4.296569	4.203312
ITM2B	0.793035	5.41642	3.36553	0.017163	0.077188	-3.49425	5.259757	4.780055	5.790322	5.835561
INPP5J	0.792848	1.47679	4.13708	0.00729315	0.0474872	-2.55418	1.128462	1.032274	1.935077	1.811356
RAB11B	0.792787	5.12592	3.73446	0.0112689	0.0601196	-3.03345	4.874515	4.584538	5.612564	5.432064
GPC4	0.791679	1.59469	3.04999	0.0250133	0.0972546	-3.9036	1.4751799	0.9225187	2.1105602	1.8704965
ASF1B	0.791411	5.32743	3.80332	0.0104424	0.0580267	-2.9497	4.823195	5.040261	5.834967	5.611310
S100A11	0.791276	9.67608	2.66233	0.0405487	0.131608	-4.42233	9.662697	8.898179	10.121896	10.021533
PPARD	0.791078	3.52197	3.56676	0.0136079	0.0672401	-3.24041	3.316523	2.936339	3.984002	3.851018
HOXD10	0.790526	1.12579	4.16039	0.00711701	0.0470918	-2.52719	0.6714159	0.7896338	1.4906259	1.5514756
IFITM1	0.790308	3.45174	3.95503	0.00885179	0.052871	-2.76778	3.077751	3.035413	3.967441	3.726338
GNE	0.789318	4.61613	3.96934	0.00871643	0.0525286	-2.7508	4.339422	4.103517	5.010428	5.011147
OSCAR	0.78928	5.30143	4.1377	0.00728837	0.0474802	-2.55345	4.842757	4.970814	5.729217	5.662915
INPPL1	0.789225	5.92786	4.09001	0.00766402	0.0490528	-2.60891	5.603300	5.463190	6.373789	6.271151
SNAPC2	0.789052	4.03779	3.40528	0.0163857	0.0747851	-3.44365	3.435821	3.850713	4.532058	4.332581
CCDC134	0.788652	1.99024	4.07849	0.00775801	0.0494563	-2.62236	1.527257	1.664563	2.441654	2.327470
SULT1A1	0.788552	1.19589	3.79053	0.0105906	0.0583759	-2.9652	0.6490886	0.9541435	1.6211634	1.5591737
DNASE1L2	0.787592	2.33239	2.4628	0.0524097	0.154963	-4.69403	2.369895	1.507284	2.759234	2.693130
HIST1H1C	0.786956	7.38895	1.75968	0.133217	0.28024	-5.6474	6.326284	7.664664	7.878188	7.686672
NXF1	0.786596	4.7913	2.00914	0.0953711	0.226693	-5.31355	4.970300	3.825700	5.205662	5.163531
RGS16	0.786587	4.98869	2.99348	0.0268019	0.101582	-3.97824	4.290137	4.900654	5.428859	5.335106
CAT	0.786317	2.99072	4.03126	0.0081572	0.0510344	-2.6777	2.554953	2.640177	3.294634	3.473130
MTMR11	0.785468	2.53787	4.00625	0.00837809	0.051783	-2.70716	2.043162	2.247110	2.908954	2.952255
RPA4	0.785187	0.765207	3.04293	0.0252295	0.0980058	-3.91291	0.6655504	0.0796774	1.1052055	1.2103959
B3GAT1	0.784943	3.19482	3.75919	0.0109639	0.059359	-3.00329	2.902063	2.702643	3.710481	3.464111
C1orf54	0.78456	1.85547	2.81856	0.033289	0.116026	-4.21151	1.119440	1.806939	2.225229	2.270270
TMEM55A	0.784118	2.94458	2.23193	0.0709221	0.187697	-5.00994	3.046046	2.058987	3.292341	3.380928
PRICKLE3	0.783971	3.8121	4.20322	0.00680594	0.0458558	-2.47784	3.439795	3.400442	4.224044	4.184135
SEPN1	0.783744	5.36128	1.97812	0.0994084	0.233126	-5.35551	5.548674	4.390145	5.804517	5.701790
SCUBE3	0.783369	1.09358	3.42329	0.0160463	0.073946	-3.42079	0.9215042	0.4822887	1.5183093	1.4522214
GAB3	0.783126	0.696051	4.14163	0.00725838	0.0474612	-2.5489	0.3426613	0.2663154	1.0429691	1.1322591
IL21R	0.78288	0.510066	4.00384	0.00839967	0.0518412	-2.70999	0.16472963	0.07252295	0.99189583	0.81111667
GLG1	0.782063	4.85209	4.09293	0.00764034	0.0490373	-2.6055	4.386840	4.535274	5.237551	5.248688
COL5A3	0.781988	0.764493	4.12282	0.00740331	0.0480036	-2.57072	0.3895777	0.3574209	1.2171774	1.0937979
USP11	0.781937	7.09475	3.44341	0.0156767	0.0727671	-3.39532	6.495352	6.912210	7.546303	7.425133
VGLL4	0.781847	3.79004	3.70976	0.0115831	0.061192	-3.06366	3.560712	3.237523	4.216456	4.145472
HLA.C	0.781736	3.10097	3.08992	0.023829	0.0943467	-3.85109	2.434123	2.986078	3.564646	3.419028
LOC389602	0.781733	0.516661	3.88438	0.00955564	0.0550991	-2.85205	0.15514979	0.09643916	0.78223191	1.03282287
UBE2D4	0.781213	3.01941	3.53509	0.0141083	0.0685212	-3.27997	2.819193	2.438419	3.467696	3.352343
PDLIM4	0.780632	5.80994	3.05886	0.0247447	0.0965624	-3.89192	5.132738	5.706502	6.247804	6.152699
GAMT	0.780188	4.76616	2.01376	0.0947843	0.225928	-5.30729	3.818192	4.933933	5.245554	5.066948
INO80C	0.77959	3.35176	3.25218	0.0196149	0.0838634	-3.63978	2.710182	3.213742	3.740659	3.742445
PTHLH	0.779404	3.21976	4.05061	0.00799094	0.0503293	-2.65499	2.746698	2.913411	3.612647	3.606271
CCDC153	0.779148	1.09307	3.67777	0.0120049	0.0623344	-3.10294	0.5642971	0.8427000	1.5789726	1.3863201
TENM2	0.779055	0.713687	3.77485	0.0107755	0.0588107	-2.98423	0.4692753	0.1790439	1.0674877	1.1389425
ZDHHC12	0.778731	5.22006	2.97027	0.0275769	0.103249	-4.00901	4.537001	5.124390	5.700345	5.518508
EMILIN1	0.778232	5.65048	3.83365	0.0101001	0.0568488	-2.91305	5.182886	5.339841	6.150752	5.928440
TRIM21	0.778077	2.49906	2.45454	0.0529751	0.15595	-4.70533	1.683185	2.536867	2.888812	2.887395
C1orf56	0.778017	3.92975	3.46238	0.0153367	0.07192	-3.37134	3.337004	3.744472	4.370143	4.267366
SLC6A6	0.77753	2.98168	3.41567	0.016189	0.0742557	-3.43046	2.808694	2.377127	3.405748	3.335135
TOB2	0.776955	4.57487	3.83502	0.010085	0.0567885	-2.91139	4.311544	4.061240	5.012306	4.914388
CNNM4	0.776898	2.6969	3.99914	0.00844206	0.0519353	-2.71555	2.213982	2.402927	3.082477	3.088227
TYMS	0.776572	3.64389	4.09169	0.00765038	0.0490391	-2.60695	3.238816	3.272385	4.094680	3.969665
RAB29	0.77638	4.52469	3.98538	0.0085675	0.0521472	-2.7318	4.229066	4.043925	4.943612	4.882139
NCKAP5L	0.776108	4.49079	3.33267	0.0178367	0.0790352	-3.53626	4.326387	3.879078	4.945575	4.812106
VPS9D1	0.775996	3.67264	4.05227	0.00797683	0.0502997	-2.65304	3.359478	3.209804	4.080200	4.041075
NDE1	0.775974	3.32918	3.60061	0.0130949	0.065567	-3.1983	3.109369	2.773026	3.785664	3.648679
CASP6	0.775054	2.3896	4.16043	0.00711671	0.0470918	-2.52714	1.986060	2.018095	2.794362	2.759900
PROSER1	0.774756	4.31431	1.19762	0.279927	0.447998	-6.3394	4.956606	2.897254	4.693327	4.710045
PLA2G6	0.774429	2.08094	3.36724	0.0171287	0.0771273	-3.49207	1.894387	1.493070	2.365600	2.570714
MYO18A	0.774087	3.76777	3.87588	0.00964452	0.055282	-2.86224	3.260626	3.500832	4.175803	4.133828
EHF	0.773528	0.543423	3.76337	0.0109132	0.0591348	-2.9982	0.2054314	0.1078872	0.7923396	1.0680345
MN1	0.773166	0.728193	3.75028	0.0110727	0.0596953	-3.01414	0.4659865	0.2172329	1.1961204	1.0334312
GRIN2C	0.773016	1.05872	3.96351	0.00877132	0.0526349	-2.75771	0.7604620	0.5839612	1.4008456	1.4896089
GDPGP1	0.772857	2.19757	3.97218	0.00868986	0.0524674	-2.74743	1.752606	1.869671	2.660355	2.507636
LAMC3	0.772241	0.593839	4.09976	0.00758543	0.0487835	-2.59754	0.2405390	0.1748985	0.9397294	1.0201894
ALOX5	0.771756	0.499498	4.01606	0.00829064	0.0515665	-2.69559	0.13214153	0.09509811	0.96506560	0.80568510
ATF7	0.771708	2.64881	2.03393	0.0922644	0.222199	-5.27993	2.811760	1.714144	3.066882	3.002439
TMEM74	0.771658	0.803268	3.75779	0.0109809	0.0594008	-3.00499	0.3290375	0.5058410	1.0735656	1.3046281
NRG1	0.771616	1.43995	3.92478	0.00914573	0.0538311	-2.80377	0.9472138	1.1610719	1.8301889	1.8213292
PHKG1	0.771302	0.824522	3.06045	0.0246969	0.0964643	-3.88983	0.7172728	0.1604686	1.2611611	1.1591846
NEURL2	0.771295	1.57603	3.79688	0.0105167	0.0582449	-2.9575	1.321042	1.059733	2.001675	1.921689
PSMB9	0.77088	2.64107	2.17148	0.0768302	0.197409	-5.09258	1.756822	2.754430	3.089040	2.963971
CASP2	0.770754	3.77925	1.90333	0.109878	0.248547	-5.45625	3.991794	2.795958	4.169389	4.159871
CTTN	0.770407	6.03104	2.81318	0.0335144	0.116526	-4.21875	5.979937	5.311731	6.429941	6.402541
PTCHD4	0.769881	1.74446	4.06356	0.00788174	0.0499251	-2.63981	1.354626	1.364422	2.067627	2.191181
SPINK13	0.769248	0.384624	2.91848	0.0293962	0.107104	-4.07787	0.0000000	0.0000000	0.4585075	1.0799882
SLC14A2	0.769183	0.391194	3.96203	0.0087853	0.0526706	-2.75947	0.01320475	0.00000000	0.86934370	0.68222757
CNP	0.769136	5.15408	2.75268	0.0361621	0.122416	-4.30016	4.430221	5.108793	5.610664	5.466622
ITPR1	0.768831	1.30654	2.77644	0.0350962	0.12026	-4.26815	1.1930887	0.6511639	1.4834967	1.8984177
CELSR2	0.768279	2.65321	2.52527	0.0483387	0.147376	-4.60875	2.668316	1.869831	3.067547	3.007158
MAGI1	0.767645	1.80845	2.51828	0.0487772	0.148127	-4.61829	1.793823	1.055436	2.034158	2.350392
PROB1	0.766952	2.04286	3.28979	0.0187607	0.0811884	-3.5913	1.886064	1.432704	2.484787	2.367887
AK1	0.766708	5.09488	2.25	0.0692494	0.185314	-4.98521	4.246698	5.176345	5.574625	5.381835
TMEM164	0.766013	3.24818	3.76592	0.0108825	0.0591044	-2.9951	2.727831	3.002508	3.641583	3.620782
GLP2R	0.765939	1.18601	3.34629	0.017554	0.0782981	-3.51883	0.5961238	1.0099647	1.6500760	1.4878914
G0S2	0.765919	0.469827	2.9812	0.027209	0.102398	-3.99451	0.1737353	0.0000000	1.1346360	0.5709366
TRPM4	0.765654	2.24267	4.0139	0.00830983	0.0516254	-2.69814	1.797973	1.921712	2.662485	2.588509
PNPLA3	0.765185	2.27224	2.91085	0.0296753	0.107687	-4.08804	2.196622	1.582666	2.618775	2.690884
ANGPTL2	0.764944	3.43496	3.81835	0.0102712	0.0574244	-2.93152	2.935804	3.169174	3.861353	3.773513
RHNO1	0.764686	4.63887	3.10838	0.0233024	0.0930529	-3.82688	4.519896	3.993157	4.971485	5.070939
RCOR1	0.76419	3.00443	2.01237	0.0949601	0.226094	-5.30917	3.171134	2.073539	3.344800	3.428255
GNGT2	0.764071	1.29002	2.75835	0.0359043	0.121886	-4.29251	0.6009547	1.2150088	1.8214914	1.5226138
CMTM7	0.763428	3.17755	3.45008	0.0155563	0.0723923	-3.38689	2.935155	2.656512	3.702501	3.416022
PCDHB8	0.762972	2.17982	3.6231	0.0127662	0.0644761	-3.17041	1.963172	1.633487	2.563219	2.559384
SOX13	0.762815	3.16061	3.64716	0.0124246	0.0635117	-3.14065	2.927405	2.630999	3.601616	3.482417
GIPR	0.762723	1.22033	3.99799	0.00845248	0.0519613	-2.7169	0.8757976	0.8021357	1.6638722	1.5395073
UPK3B	0.762392	1.1796	2.96587	0.0277266	0.103634	-4.01485	1.046460	0.550350	1.400638	1.720956
CALCB	0.762055	0.624606	3.03398	0.0255062	0.098661	-3.9247	0.2614399	0.2257174	1.2860048	0.7252618
ZNF296	0.762041	3.11832	3.26112	0.019408	0.0832849	-3.62824	2.951528	2.523062	3.597339	3.401332
FOXO4	0.76194	3.27198	3.47136	0.0151787	0.0715993	-3.36002	2.728204	3.053824	3.759011	3.546897
PLEKHA6	0.761854	0.800927	3.80705	0.0103995	0.0579222	-2.94518	0.5344123	0.3055881	1.1347989	1.2289100
SKAP2	0.761849	3.12021	1.76902	0.131558	0.278195	-5.63508	3.355042	2.123536	3.306968	3.695307
PODXL	0.761577	3.47247	2.24499	0.0697087	0.185899	-4.99207	3.562140	2.621221	3.887273	3.819242
LOC101927322	0.761222	0.677332	3.78453	0.0106609	0.0585115	-2.97248	0.3088718	0.2845703	1.1855799	0.9303062
GPR162	0.761004	1.30703	3.87889	0.00961294	0.0551503	-2.85863	0.8216792	1.0313695	1.6835028	1.6915549
GPR62	0.760505	0.958354	3.74652	0.011119	0.0598442	-3.01873	0.7123877	0.4438146	1.3169322	1.3602807
BGN	0.759863	3.57145	2.20055	0.0739273	0.192935	-5.05285	3.653043	2.729998	4.096174	3.806593
ADGRE2	0.759504	1.00979	3.99035	0.00852198	0.0521148	-2.72593	0.6748361	0.5852480	1.3370861	1.4420054
H2AFX	0.75842	6.99617	3.23079	0.02012	0.0850102	-3.66744	6.406039	6.827871	7.486744	7.264007
POLR3GL	0.758249	2.20861	4.02995	0.00816862	0.0510597	-2.67924	1.803921	1.855042	2.545011	2.630450
MYRF	0.758155	2.85232	2.77893	0.0349862	0.12004	-4.26479	2.801682	2.144801	3.280166	3.182628
OPCML	0.757268	0.402211	3.93706	0.00902511	0.0534072	-2.78914	0.009034533	0.038119838	0.699178539	0.862511737
TMEM246	0.757014	2.9188	3.99677	0.00846351	0.0519843	-2.71834	2.557969	2.522611	3.356228	3.238380
LHB	0.755838	2.7304	3.38697	0.0167387	0.0757982	-3.46693	2.201638	2.503328	3.247903	2.968739
SERINC5	0.755819	1.7918	2.48182	0.0511325	0.152613	-4.66805	1.811593	1.016179	2.118236	2.221173
FBXL18	0.755513	3.43732	2.29556	0.0652144	0.178732	-4.92286	3.504472	2.614647	3.891723	3.738422
ACTN1	0.754963	6.5347	3.94074	0.00898928	0.0532445	-2.78476	6.207615	6.106814	6.971591	6.852763
LAMC2	0.754884	1.74988	3.90791	0.00931447	0.0544146	-2.8239	1.344333	1.400550	2.043846	2.210806
PTPRCAP	0.754425	2.73081	3.79494	0.0105392	0.0583216	-2.95986	2.455059	2.252142	3.167671	3.048379
DLK2	0.754158	2.5306	3.21159	0.0205857	0.0863759	-3.69232	2.361779	1.945254	3.024356	2.790994
RASL12	0.754022	0.989161	3.77528	0.0107703	0.0588091	-2.98371	0.4902107	0.7340898	1.3680831	1.3642610
MAPK7	0.754009	2.51129	2.90148	0.0300219	0.108564	-4.10054	2.427275	1.841300	2.961502	2.815091
RASSF5	0.753818	1.54659	4.01198	0.00832689	0.0516412	-2.7004	1.202975	1.136384	1.890361	1.956634
ALDH5A1	0.753705	1.61742	2.91191	0.0296362	0.107667	-4.08662	1.5315766	0.9495665	1.9233282	2.0652256
SLC25A35	0.75345	2.07182	3.41465	0.0162081	0.0742899	-3.43175	1.892925	1.497269	2.453766	2.443328
MYO15B	0.752983	1.39781	3.03602	0.0254429	0.0984758	-3.92202	1.2897014	0.7529457	1.7238132	1.8247992
BFSP1	0.752875	2.06243	2.65762	0.0407929	0.1322	-4.42872	1.344416	2.027560	2.537111	2.340616
ARHGAP25	0.75256	0.716752	3.55644	0.0137686	0.0676036	-3.25328	0.5069438	0.1739998	1.0674954	1.1185690
BIK	0.752493	2.72958	2.19335	0.0746353	0.194149	-5.06269	1.890297	2.816369	3.229649	2.982004
NAT6	0.752444	3.97779	3.95247	0.00887622	0.052951	-2.77081	3.635972	3.567170	4.414142	4.293889
MAP3K11	0.751858	5.5903	3.41346	0.0162305	0.0743661	-3.43326	5.037721	5.391027	6.052736	5.879729
NOTCH2NL	0.75168	4.83892	3.83698	0.0100633	0.0567416	-2.90903	4.362712	4.563447	5.239744	5.189775
PMP22	0.75087	6.07367	3.91982	0.00919495	0.0539987	-2.80968	5.663640	5.732822	6.518747	6.379454
MEX3B	0.750525	1.51644	3.73163	0.0113044	0.0601837	-3.03691	1.269184	1.013181	1.885572	1.897842
SPINK6	0.748055	0.750088	2.65467	0.0409462	0.132436	-4.43272	0.07841213	0.67370821	0.93600057	1.31223036
MSN	0.747903	6.87103	3.5562	0.0137725	0.0676036	-3.25359	6.346738	6.647417	7.310205	7.179756
NEO1	0.747679	1.43343	3.51736	0.0143973	0.0693887	-3.30218	1.2312435	0.8879376	1.8126251	1.8019133
ADRA2C	0.747657	0.589706	3.88677	0.00953085	0.0550991	-2.84919	0.2498956	0.1818604	1.0393005	0.8877689
NFIB	0.747582	1.98578	1.79812	0.126524	0.271155	-5.59661	2.215682	1.008305	2.226981	2.492170
ARHGEF3	0.747116	1.47459	2.97825	0.0273075	0.102575	-3.99842	1.3803967	0.8216758	1.8692998	1.8270053
GPR68	0.747111	0.913867	2.77981	0.0349474	0.120026	-4.26361	0.8494663	0.2311567	1.3801795	1.1946652
SQSTM1	0.746986	9.60903	2.06476	0.0885472	0.21622	-5.23806	8.721859	9.749218	10.030107	9.934941
VIPR1	0.74694	0.963043	3.91345	0.00925863	0.0541853	-2.81728	0.6523635	0.5267826	1.3735722	1.2994537
CTC1	0.746884	2.60552	2.95364	0.0281471	0.104605	-4.03108	2.512338	1.951818	3.031321	2.926603
C18orf32	0.74679	1.63432	3.74852	0.0110944	0.0597871	-3.01629	1.149296	1.372546	1.964599	2.050823
PIAS3	0.74666	4.89228	2.97869	0.0272927	0.102565	-3.99783	4.795245	4.242651	5.309035	5.222181
PCYT1B	0.746074	1.03577	3.73562	0.0112544	0.0600764	-3.03203	0.5433124	0.7821521	1.4333878	1.3842252
HS6ST1	0.745639	2.52626	3.36038	0.0172668	0.077394	-3.50084	1.961355	2.345517	2.960585	2.837566
AKR1C3	0.745438	0.84138	3.80032	0.0104769	0.0581253	-2.95334	0.3669298	0.5703922	1.1892694	1.2389292
IFITM3	0.744802	9.30225	2.77853	0.035004	0.12004	-4.26534	9.248449	8.611250	9.714994	9.634309
PNLIPRP3	0.744571	0.421748	3.88658	0.00953286	0.0550991	-2.84942	0.09892446	0.00000000	0.73387020	0.85419596
PLXNA3	0.744445	3.2131	2.16448	0.077547	0.198732	-5.10214	3.320695	2.361064	3.619063	3.551586
CD59	0.744202	5.86774	3.9353	0.00904226	0.0534346	-2.79123	5.533217	5.458056	6.194430	6.285246
RNF44	0.744027	4.56544	1.80907	0.124679	0.268946	-5.58208	4.802185	3.584670	4.972098	4.902812
WASF1	0.743557	3.17181	1.41718	0.210296	0.375334	-6.08312	3.614719	1.985338	3.577264	3.509909
MROH6	0.743381	1.98683	1.86188	0.116156	0.257882	-5.51177	2.195911	1.034369	2.445742	2.271300
FANCC	0.742869	2.91683	3.9493	0.00890661	0.052951	-2.77458	2.501165	2.589628	3.309897	3.266634
SLIT2	0.742522	1.43795	2.85284	0.0318937	0.112831	-4.16556	1.364615	0.768768	1.754227	1.864200
USP2	0.742015	1.39183	2.85088	0.0319716	0.112849	-4.16818	1.3236434	0.7179988	1.7718471	1.7538257
ANKRD2	0.741787	0.862863	3.82528	0.0101933	0.0571968	-2.92314	0.4356670	0.5482721	1.1603471	1.3071665
CBARP	0.74151	2.36444	2.02078	0.0938992	0.224487	-5.29777	2.515939	1.471430	2.673791	2.796597
CDK5R2	0.7413	0.840039	3.95802	0.00882331	0.0527995	-2.76423	0.5091490	0.4296289	1.2089150	1.2124626
FGFR1	0.741295	3.03142	3.15247	0.022096	0.0903236	-3.76923	2.429569	2.891968	3.464942	3.339185
B4GALT5	0.740747	5.41386	3.79141	0.0105802	0.0583759	-2.96413	5.135847	4.951127	5.824183	5.744286
MREG	0.740416	1.93009	3.57632	0.0134607	0.0667968	-3.22849	1.706739	1.413029	2.261398	2.339203
IRF2BP2	0.740322	5.39275	1.92191	0.107176	0.245051	-5.43129	5.577996	4.467188	5.840154	5.685675
THNSL2	0.739587	4.30044	3.95892	0.00881475	0.052773	-2.76316	3.962966	3.898332	4.677207	4.663265
ZNF774	0.739392	1.55006	2.85167	0.03194	0.112831	-4.16711	1.4675437	0.8931869	1.8309456	2.0085687
NCALD	0.739066	0.696229	3.95936	0.00881057	0.052773	-2.76263	0.3499967	0.3033946	1.0855836	1.0459392
TOR4A	0.738757	3.63032	2.50723	0.0494784	0.149546	-4.63336	3.617618	2.904268	4.130994	3.868406
RAB4B	0.737316	1.21281	3.78699	0.010632	0.0585035	-2.9695	0.8951172	0.7931857	1.6639220	1.4990133
GRAMD1B	0.737046	4.99705	2.83181	0.0327421	0.114777	-4.19374	4.931436	4.325623	5.370825	5.360326
CD276	0.736107	4.73642	3.33035	0.0178854	0.0790571	-3.53923	4.169310	4.567420	5.105627	5.103316
LCTL	0.736002	1.51885	3.89537	0.00944208	0.0547598	-2.83889	1.125680	1.176023	1.835215	1.938492
TCF19	0.735698	1.85643	3.31294	0.0182554	0.079894	-3.56155	1.302843	1.674316	2.304256	2.144299
BMP6	0.73565	2.13788	3.26289	0.0193674	0.0831666	-3.62596	1.981791	1.558326	2.521692	2.489725
KLF10	0.73564	3.78686	1.85377	0.117426	0.259709	-5.5226	4.001630	2.836459	4.142172	4.167196
OPTC	0.735329	0.387831	3.94947	0.00890501	0.052951	-2.77438	0.04033249	0.00000000	0.76153231	0.74945814
CGN	0.73521	1.61822	3.01997	0.0259465	0.0995809	-3.9432	1.481425	1.019814	1.862918	2.108742
RAVER1	0.735008	5.7046	1.72678	0.139223	0.288135	-5.69063	5.966106	4.708081	6.168816	5.975386
MYL6	0.734778	9.8302	1.89002	0.111855	0.25161	-5.47411	8.898378	10.027242	10.256565	10.138611
DUSP5	0.734749	6.72255	3.80383	0.0104365	0.0580267	-2.94909	6.300027	6.410326	7.158546	7.021303
ODF3L1	0.734455	0.442638	3.86968	0.00971	0.0554585	-2.86969	0.04878084	0.10203950	0.75082966	0.86890074
APOC1	0.734088	2.77004	2.99423	0.0267773	0.10158	-3.97725	2.154641	2.651346	3.042119	3.232043
TLN2	0.733984	1.6029	3.9505	0.0088951	0.052951	-2.77316	1.235119	1.236692	1.963348	1.976431
PCDHGC3	0.733334	3.28838	3.78017	0.0107123	0.0586615	-2.97777	2.976968	2.866454	3.729805	3.580286
CPM	0.733296	1.04705	3.35284	0.0174197	0.077862	-3.51045	0.8582164	0.5025942	1.3416669	1.4857350
NUDT14	0.733099	3.01442	2.42688	0.0549153	0.16004	-4.74314	2.270184	3.025555	3.499466	3.262471
BCL9L	0.732814	5.47724	1.38373	0.219766	0.386146	-6.12357	5.932486	4.289189	5.907428	5.779876
IDH2	0.732628	4.69667	1.91849	0.107669	0.245782	-5.43589	3.777727	4.882976	5.107780	5.018181
GAL3ST4	0.73232	1.94782	3.54871	0.0138905	0.0678502	-3.26294	1.663709	1.499609	2.438807	2.189151
ADAT1	0.732003	4.32985	2.96555	0.0277374	0.103634	-4.01527	4.233883	3.693815	4.702525	4.689181
EFEMP2	0.73186	3.94916	3.42331	0.0160459	0.073946	-3.42076	3.657974	3.508490	4.474283	4.155901
TINAGL1	0.731385	8.4132	2.27337	0.0671482	0.181772	-4.95324	7.619896	8.475125	8.866471	8.691320
PRSS23	0.730311	4.82435	3.82796	0.0101634	0.0571545	-2.91991	4.411450	4.506941	5.243826	5.135186
TIAM2	0.730187	0.827742	3.45812	0.0154124	0.0721254	-3.37673	0.6252259	0.3000707	1.1553585	1.2303123
HLA.A	0.730176	5.6902	2.09194	0.0853968	0.211721	-5.20107	4.840307	5.809924	6.133339	5.977244
CNOT4	0.730083	2.48887	1.70918	0.142545	0.292407	-5.71365	2.760716	1.486950	2.799849	2.907982
TLE4	0.729936	3.22677	1.95969	0.101891	0.236709	-5.38041	3.397858	2.325747	3.570229	3.613248
CRLF1	0.72901	2.26846	3.80336	0.0104419	0.0580267	-2.94966	1.974173	1.833729	2.668193	2.597730
DIP2B	0.728826	3.33231	2.03986	0.0915374	0.221156	-5.27188	3.468469	2.467335	3.615155	3.778300
LRP10	0.728802	6.04604	3.64296	0.0124835	0.0636775	-3.14585	5.574043	5.789240	6.470957	6.349929
HAS2	0.728498	0.704059	3.63725	0.0125639	0.0639092	-3.15289	0.3375844	0.3420360	0.9438546	1.1927611
TRADD	0.728393	3.43552	2.75884	0.0358826	0.121845	-4.29187	2.791661	3.350985	3.937541	3.661892
SVEP1	0.72783	0.96701	3.40785	0.0163367	0.0747189	-3.44038	0.7465092	0.4596810	1.2303775	1.4314729
WIZ	0.7265	5.02042	2.23389	0.0707384	0.187366	-5.00726	5.096773	4.217570	5.443027	5.324315
IL17RA	0.725796	2.38573	3.84259	0.0100017	0.0565439	-2.90227	2.048648	1.997025	2.799336	2.697929
RHOF	0.725225	1.45999	3.70013	0.0117083	0.0615396	-3.07547	0.996672	1.198081	1.848295	1.796909
KCTD11	0.724802	3.5055	3.08594	0.0239441	0.0946221	-3.85631	2.905486	3.380702	3.843555	3.892237
OAS3	0.724191	3.89012	3.55737	0.0137541	0.0676034	-3.25212	3.391622	3.664421	4.275760	4.228665
GBA	0.72361	5.28822	3.10926	0.0232776	0.093023	-3.82572	4.699186	5.153641	5.701486	5.598561
IDS	0.723214	4.2012	1.53998	0.178707	0.337564	-5.931	4.549961	3.129225	4.467442	4.658172
HDHD3	0.723138	2.27701	3.73207	0.0112989	0.0601837	-3.03637	1.825114	2.005777	2.653906	2.623261
NFKBID	0.722887	1.48299	3.42032	0.0161017	0.0740413	-3.42455	1.2792838	0.9638166	1.9008984	1.7879754
KCND1	0.72272	1.11801	2.85883	0.0316563	0.112469	-4.15753	1.0384070	0.4748965	1.5219079	1.4368362
PET117	0.722451	2.66528	3.84734	0.0099498	0.0563749	-2.89654	2.262177	2.345929	3.044848	3.008161
EP400	0.722236	3.65364	1.18447	0.284687	0.452161	-6.354	4.257016	2.328018	4.048025	3.981481
DTX1	0.721291	2.61255	3.36153	0.0172435	0.0773568	-3.49936	2.073418	2.430386	2.973278	2.973108
DGKQ	0.720926	3.3597	2.77618	0.0351073	0.120266	-4.26849	3.296077	2.702399	3.773241	3.667087
OAZ2	0.720786	5.14742	2.86623	0.0313657	0.111791	-4.14762	4.512520	5.061541	5.570984	5.444649
KDR	0.720783	0.667204	3.76472	0.0108969	0.0591215	-2.99655	0.3834167	0.2302086	1.0361604	1.0190317
HSD17B7	0.720174	1.28154	3.73761	0.0112295	0.0600458	-3.0296	0.9182401	0.9246595	1.5565861	1.7266614
SPAG4	0.719665	3.25352	3.28845	0.0187904	0.081262	-3.59303	2.707548	3.079826	3.661566	3.565138
PLCB3	0.719552	3.9975	3.73669	0.011241	0.0600458	-3.03072	3.720300	3.555154	4.374503	4.340055
FZD7	0.719527	3.03299	2.63212	0.0421416	0.134564	-4.46332	2.996108	2.350335	3.475289	3.310208
APOD	0.71951	1.97815	3.45741	0.0154251	0.0721254	-3.37762	1.762883	1.473913	2.279299	2.396517
ACTB	0.719277	10.2891	3.66437	0.0121866	0.062865	-3.11943	9.973792	9.885149	10.744408	10.553088
HOXA3	0.71891	2.92291	1.83181	0.120934	0.264651	-5.55187	3.136381	1.990527	3.324560	3.240168
TROAP	0.717506	3.90663	3.74132	0.0111833	0.0599127	-3.02506	3.531575	3.564173	4.342941	4.187818
ABCG4	0.717488	0.613225	3.8556	0.00986033	0.0560074	-2.8866	0.2730735	0.2358881	0.9717689	0.9721683
SLC1A4	0.717175	5.5672	2.816	0.0333963	0.116273	-4.21496	4.940681	5.476538	6.035505	5.816064
NDUFB10	0.717077	7.66402	3.40402	0.0164097	0.0747851	-3.44525	7.143725	7.467247	8.055610	7.989517
MYH9	0.717036	6.47396	3.80991	0.0103669	0.0577958	-2.94172	6.132799	6.098083	6.879685	6.785269
TOB1	0.716949	3.11233	1.75585	0.133903	0.281082	-5.65245	3.355938	2.151766	3.419884	3.521719
ICAM5	0.716948	3.85224	3.54679	0.013921	0.0679687	-3.26534	3.604348	3.383181	4.283673	4.137751
SEMA4A	0.716788	0.474876	3.76863	0.0108499	0.059062	-2.9918	0.16177980	0.07118343	0.88389820	0.78264140
LIPC	0.716375	0.466507	3.78594	0.0106444	0.0585075	-2.97077	0.14023413	0.07640576	0.87540322	0.77398659
DRD2	0.71624	1.4048	3.758	0.0109783	0.0594008	-3.00474	1.066884	1.026480	1.694955	1.830889
ZNF490	0.716017	1.96882	2.00056	0.0964708	0.228288	-5.32516	2.117304	1.104311	2.283237	2.370412
CYTL1	0.715387	0.655885	3.25595	0.0195273	0.0836565	-3.63491	0.3640226	0.2323617	1.1971333	0.8300241
IRGM	0.715374	0.357687	3.75577	0.0110055	0.059509	-3.00746	0.0000000	0.0000000	0.7854045	0.6453444
TMEM107	0.714798	2.19362	3.22871	0.0201698	0.085154	-3.67013	1.942823	1.729621	2.720425	2.381615
MAGEE1	0.713808	0.845965	3.54651	0.0139254	0.0679687	-3.26568	0.6170619	0.3610594	1.2169683	1.1887690
ST3GAL2	0.712827	3.59782	3.5121	0.0144844	0.0697092	-3.30878	3.130657	3.352152	4.033019	3.875443
GATS	0.712708	0.892916	3.1736	0.0215424	0.0890096	-3.74168	0.7444487	0.3286748	1.2215622	1.2769769
AP2A2	0.712526	2.90479	3.69253	0.0118082	0.06176	-3.0848	2.479200	2.617861	3.313350	3.208763
HLA.F	0.711886	0.876514	3.70638	0.0116269	0.0612881	-3.06781	0.4432336	0.5979084	1.2571515	1.2077618
SLPI	0.710395	2.37917	2.17664	0.0763066	0.196501	-5.08553	1.579981	2.467958	2.775903	2.692825
KDELC1	0.710121	3.84084	3.67884	0.0119904	0.0623304	-3.10161	3.398838	3.572723	4.203012	4.188792
RHBDF2	0.709743	3.26828	3.23783	0.0199521	0.084626	-3.65833	3.106113	2.720698	3.606781	3.639516
KIAA1217	0.708948	2.61094	1.35162	0.229226	0.395496	-6.16195	3.071516	1.441418	2.955809	2.975020
FUT8	0.70827	2.15971	2.50313	0.0497411	0.149986	-4.63895	2.154126	1.457018	2.448200	2.579483
HSPA1A	0.707919	1.20921	3.52394	0.0142892	0.0690851	-3.29393	0.7288264	0.9816719	1.5764376	1.5498985
GRK5	0.707894	2.49388	3.29278	0.0186946	0.0810127	-3.58746	1.961508	2.318353	2.870423	2.825225
HIST1H3D	0.707616	1.42775	3.50433	0.0146141	0.0700384	-3.31854	1.049901	1.097985	1.910924	1.652194
SPATA12	0.707164	0.474415	3.7936	0.0105548	0.058355	-2.96148	0.1404831	0.1011826	0.8449983	0.8109952
IGFBP2	0.706557	3.75849	2.00307	0.0961469	0.22769	-5.32176	2.908093	3.902336	4.145822	4.077721
NPAS1	0.706201	2.6335	3.68603	0.0118943	0.0620833	-3.09277	2.210240	2.350561	3.020625	2.952577
PCDHB15	0.706039	2.18611	2.43448	0.0543749	0.1589	-4.73275	2.199902	1.466270	2.588323	2.489927
LMTK2	0.70571	3.27701	1.62451	0.159651	0.313708	-5.82341	3.576664	2.271642	3.636961	3.622765
VDR	0.705426	3.25588	3.05406	0.0248898	0.096892	-3.89824	3.123176	2.683161	3.668926	3.548262
MANSC1	0.705143	3.79008	3.13974	0.0224371	0.0910142	-3.78585	3.644249	3.230772	4.107162	4.178144
RGS8	0.704734	0.509088	3.76832	0.0108536	0.059062	-2.99218	0.1819052	0.1315368	0.8356605	0.8872503
SALL2	0.704476	1.5535	3.66743	0.0121449	0.0627823	-3.11567	1.256141	1.146389	1.965745	1.845738
CABLES2	0.703915	2.22105	2.63449	0.0420142	0.134319	-4.46011	2.181486	1.556699	2.507691	2.638324
SLC26A6	0.703878	3.89638	3.78498	0.0106556	0.0585075	-2.97193	3.558480	3.530396	4.252966	4.243666
PCDH12	0.703869	0.939874	3.07479	0.0242704	0.0953971	-3.87097	0.8041091	0.3717707	1.2399102	1.3437072
DAB2	0.703179	2.44414	2.4839	0.0509951	0.15254	-4.66521	2.446274	1.738825	2.765747	2.825710
DDR1	0.701836	2.87038	3.61337	0.0129073	0.0650348	-3.18247	2.452440	2.586481	3.287676	3.154917
FAM234A	0.701711	5.93677	3.11212	0.0231972	0.092905	-3.82198	5.381741	5.790082	6.346113	6.229132
LGALS7B	0.701552	2.24806	1.47535	0.194728	0.356964	-6.01174	1.171524	2.623037	2.647487	2.550178
PCDHGB1	0.7015	1.10788	3.43135	0.0158972	0.0735482	-3.41058	0.8989192	0.6153349	1.4533887	1.4638655
TMEM14A	0.70124	2.75003	3.05145	0.0249689	0.0971408	-3.90168	2.174601	2.624222	3.103607	3.097695
ZNF341	0.701113	1.46491	3.67756	0.0120077	0.0623344	-3.1032	1.176278	1.052428	1.780093	1.850839
DPF3	0.701095	0.663704	3.62318	0.012765	0.0644761	-3.17031	0.2697275	0.3565859	0.9353224	1.0931817
ZNF827	0.700793	2.19916	1.69798	0.144701	0.294843	-5.72828	2.459472	1.238062	2.503557	2.595563
MCCC2	0.70072	5.06947	2.47744	0.051424	0.152968	-4.67404	5.072680	4.365547	5.444613	5.395055
FBXL21	0.70035	0.877039	3.20326	0.0207913	0.086832	-3.70313	0.6306498	0.4230777	1.0661317	1.3882961
TBC1D24	0.700282	2.77548	2.77163	0.0353089	0.120601	-4.27462	2.708429	2.142254	3.154911	3.096336
MTMR1	0.69944	4.30951	3.15203	0.0221077	0.0903236	-3.7698	4.161496	3.758083	4.657171	4.661287
PLCXD1	0.699208	2.93381	3.25379	0.0195774	0.0837591	-3.6377	2.752660	2.415760	3.345538	3.221299
LIX1L	0.698883	3.25063	3.08443	0.0239879	0.0947367	-3.85829	3.072877	2.729506	3.730509	3.469640
MGRN1	0.698729	2.01711	3.05439	0.0248797	0.0968825	-3.89781	1.886183	1.449301	2.405351	2.327591
PLXNB2	0.698552	6.78394	3.7322	0.0112973	0.0601837	-3.03621	6.431762	6.437566	7.171293	7.095138
CPT2	0.698088	4.31492	3.09908	0.0235659	0.0938233	-3.83906	3.767576	4.164177	4.738189	4.589739
GRINA	0.697941	6.70554	2.98299	0.027149	0.102301	-3.99213	6.570533	6.142600	7.155032	6.953984
GLI2	0.697632	1.14856	2.74874	0.0363421	0.122688	-4.30547	1.0736165	0.5258713	1.5844638	1.4102881
SLC6A9	0.696996	4.18424	2.3867	0.0578697	0.165446	-4.7981	4.204835	3.466639	4.595831	4.469635
LRRC15	0.696724	0.398723	3.68978	0.0118445	0.0618742	-3.08817	0.05874619	0.04197613	0.69133965	0.80282986
TMEM160	0.696563	4.80498	1.15934	0.293977	0.460893	-6.38161	3.532674	5.380732	5.371660	4.934872
HMX3	0.696493	2.49232	3.38063	0.016863	0.0761995	-3.47501	2.282153	2.005996	2.894089	2.787047
CSRNP2	0.696382	4.13135	3.47883	0.0150487	0.0711435	-3.35061	3.675319	3.890999	4.540712	4.418370
TAF3	0.695932	3.23325	1.75016	0.134927	0.28249	-5.65993	3.469428	2.301150	3.591550	3.570891
PKNOX2	0.6957	0.92963	3.6268	0.0127129	0.0643596	-3.16582	0.6321731	0.5313874	1.2159343	1.3390257
PHF21A	0.695669	3.04731	2.21139	0.0728743	0.191045	-5.03803	3.121128	2.277832	3.380956	3.409341
TCEAL3	0.695598	5.06701	3.63477	0.0125992	0.0639612	-3.15596	4.718466	4.719947	5.491305	5.338304
TJAP1	0.695046	5.19722	3.14085	0.0224072	0.0909949	-3.7844	5.045740	4.653660	5.583650	5.505843
MYCL	0.694719	1.10665	3.45019	0.0155541	0.0723923	-3.38674	0.6309077	0.8876640	1.4680681	1.4399413
SEMA4F	0.694286	2.50994	3.47026	0.015198	0.0716371	-3.3614	2.054553	2.271041	2.916522	2.797643
NKD2	0.694192	1.44735	3.10473	0.0234054	0.0933878	-3.83166	1.2538119	0.9466887	1.9329648	1.6559207
CEP131	0.693147	2.83188	3.46543	0.0152828	0.0717393	-3.3675	2.443183	2.527435	3.294302	3.062611
PHLDA1	0.692905	7.3797	2.16522	0.0774713	0.198617	-5.10113	7.463218	6.603272	7.777440	7.674861
DPP3	0.69287	4.49475	2.53879	0.0475028	0.14592	-4.59031	3.834063	4.462567	4.949045	4.733326
LUM	0.692856	0.66686	3.31825	0.0181418	0.0794782	-3.55475	0.1839469	0.4569163	1.0938064	0.9327694
IFFO1	0.692445	4.66333	3.59291	0.0132097	0.0659094	-3.20786	4.234253	4.399966	5.030097	4.989012
RNF122	0.691596	0.626998	3.20283	0.020802	0.0868483	-3.70369	0.2059411	0.3564597	1.1395604	0.8060315
STX1B	0.691565	0.822829	3.0921	0.0237659	0.0942323	-3.84822	0.6838373	0.2702557	1.1778628	1.1593611
IRF5	0.691385	2.35711	3.51148	0.0144946	0.0697092	-3.30955	2.088248	1.934598	2.779410	2.626205
ERMP1	0.691347	3.13661	2.24289	0.0699024	0.186154	-4.99494	3.173770	2.408105	3.339053	3.625515
KCTD13	0.691321	5.68162	3.50213	0.0146509	0.0700918	-3.32129	5.422192	5.249724	6.097181	5.957378
HIST1H2BF	0.691024	0.760764	2.94716	0.0283728	0.105107	-4.03969	0.5632131	0.2672896	0.9201648	1.2923865
MYO10	0.690959	2.26923	1.96198	0.101579	0.236337	-5.37732	2.411624	1.435872	2.518933	2.710481
PRKCD	0.690862	5.49599	3.113	0.0231726	0.0928552	-3.82083	4.949768	5.351352	5.861560	5.821284
ZNF462	0.690718	2.60437	1.43654	0.204989	0.369137	-6.0595	2.992168	1.525858	2.875039	3.024423
SNN	0.689865	1.95311	3.52272	0.0143092	0.0691298	-3.29546	1.671893	1.544468	2.379052	2.217040
AGTRAP	0.689592	5.9757	1.95445	0.102607	0.237706	-5.38747	5.148738	6.113065	6.446955	6.194033
ABHD8	0.689282	5.12894	2.88217	0.0307499	0.110272	-4.12631	4.544813	5.023776	5.546393	5.400760
SLC39A11	0.688975	4.35231	3.40212	0.016446	0.0749238	-3.44766	3.891871	4.123769	4.764064	4.629527
DLG3	0.688934	1.97824	3.69669	0.0117533	0.0616324	-3.07968	1.634663	1.632892	2.347774	2.297649
TRIM8	0.68889	6.83199	3.49602	0.014754	0.0702435	-3.32897	6.431449	6.543644	7.270211	7.082662
TIFA	0.688509	2.89609	3.5649	0.0136366	0.0672854	-3.24273	2.479849	2.623823	3.290759	3.189930
FBXO27	0.688418	5.70148	2.35828	0.0600613	0.169926	-4.837	4.993127	5.721416	6.131850	5.959529
ARSB	0.688013	1.55402	2.59603	0.044133	0.138781	-4.51236	1.5097653	0.9102548	1.9919256	1.8041211
RBM14	0.687986	4.78943	3.36537	0.0171663	0.077188	-3.49446	4.313118	4.577765	5.184561	5.082294
TDRKH	0.687979	4.18455	3.67954	0.0119811	0.0623304	-3.10076	3.831902	3.849213	4.494153	4.562919
SREBF1	0.687382	5.50221	2.53507	0.0477316	0.146272	-4.59539	5.475265	4.841767	5.931973	5.759825
LBHD1	0.687313	2.54556	2.45547	0.0529106	0.155809	-4.70404	2.538119	1.865679	2.978798	2.799626
POM121	0.687106	3.38941	1.56334	0.173231	0.33054	-5.90148	3.707136	2.384571	3.761616	3.704301
RAD54L2	0.686892	3.57655	2.5234	0.0484553	0.147554	-4.61129	3.563736	2.902468	3.922867	3.917120
NOVA1	0.685952	1.00643	2.84198	0.0323288	0.113702	-4.18011	0.9191051	0.4077951	1.3343124	1.3644920
MYL9	0.685305	1.79341	2.43821	0.0541113	0.158419	-4.72764	1.690611	1.210900	1.880457	2.391664
ST3GAL4	0.685242	7.51237	1.94291	0.104205	0.240017	-5.40303	6.678947	7.660553	7.940486	7.769498
CMTM8	0.6851	2.36201	3.64128	0.0125071	0.0637471	-3.14792	2.042894	1.996034	2.660699	2.748429
YY1	0.684884	1.65793	3.00051	0.0265717	0.100981	-3.96893	1.393041	1.237940	2.206710	1.794039
IFI30	0.683274	6.79616	2.19705	0.0742704	0.193712	-5.05763	6.047640	6.861398	7.216777	7.058809
PIK3AP1	0.682533	1.09416	2.55811	0.0463358	0.143682	-4.56399	1.0585590	0.4472219	1.3467572	1.5240900
PCDHA4	0.682504	0.90021	3.52123	0.0143336	0.0692212	-3.29732	0.5823044	0.5356115	1.1524917	1.3304319
LTF	0.682498	0.588682	3.43809	0.0157734	0.0731366	-3.40204	0.1766676	0.3181986	1.0222831	0.8375793
CRMP1	0.681992	1.49731	3.32502	0.0179978	0.0792278	-3.54606	1.291885	1.020735	1.788201	1.888402
TPP1	0.68155	5.2898	2.33137	0.0622175	0.173986	-4.87384	5.320053	4.577998	5.685772	5.575379
PRAF2	0.681313	6.81526	2.10693	0.08371	0.209324	-5.18065	6.910431	6.038776	7.215208	7.096625
THBS3	0.681239	3.28136	3.39925	0.0165009	0.0751475	-3.45131	3.027161	2.854311	3.712297	3.531654
RBM3	0.681181	2.21872	2.89822	0.0301434	0.108768	-4.10488	2.117191	1.639063	2.548890	2.569725
CHD4	0.680851	5.84822	3.59131	0.0132336	0.0659514	-3.20984	5.454817	5.560774	6.222743	6.154551
UNC5B	0.680778	1.09172	3.49162	0.014829	0.0703907	-3.33451	0.7169244	0.7857371	1.3398512	1.5243671
BAZ2A	0.680051	5.19467	2.0388	0.0916663	0.221426	-5.27331	5.313551	4.395739	5.571341	5.498051
MEGF8	0.679864	3.70977	1.34197	0.232141	0.398259	-6.17341	4.150674	2.589000	4.110731	3.988672
NFIX	0.679556	5.00112	1.7064	0.143078	0.292829	-5.71729	5.242758	4.079918	5.408709	5.273079
CHST1	0.679312	2.11812	3.14128	0.0223956	0.0909805	-3.78384	1.928911	1.628015	2.563710	2.351840
TBX6	0.679226	1.12462	2.70898	0.0382161	0.12697	-4.35918	1.0001098	0.5698954	1.6432375	1.2852194
GPAT3	0.679199	5.75055	3.12448	0.0228537	0.0921061	-3.8058	5.598327	5.223576	6.099974	6.080328
FHOD3	0.678717	1.54249	3.58224	0.0133705	0.0664522	-3.22112	1.147014	1.259254	1.855422	1.908279
GALNT5	0.678682	0.865076	3.65164	0.0123621	0.0633655	-3.13512	0.5185269	0.5329433	1.2118016	1.1970324
SGCA	0.67867	1.50877	2.45768	0.0527592	0.155637	-4.70103	1.4986428	0.8402336	1.7649917	1.9312243
HS3ST1	0.678664	1.37086	3.60632	0.0130106	0.0653493	-3.19121	1.0766846	0.9863707	1.7319836	1.6884006
E2F1	0.678478	4.34326	3.10381	0.0234315	0.0934338	-3.83287	3.813813	4.194223	4.704656	4.660337
MXI1	0.678239	3.49528	2.54223	0.0472932	0.145556	-4.58563	3.467065	2.845263	3.766560	3.902246
HES6	0.678183	4.12427	2.63503	0.0419851	0.13426	-4.45937	3.545042	4.025309	4.636469	4.290247
NCOA6	0.678166	3.69692	1.09111	0.320524	0.486108	-6.45474	4.343413	2.372259	4.028420	4.043584
EIF4EBP2	0.678127	3.99017	1.77991	0.129651	0.275711	-5.6207	4.203127	3.099086	4.357573	4.300894
CELSR1	0.678096	2.72353	2.48547	0.0508915	0.152305	-4.66307	2.713709	2.055255	3.105746	3.019410
TM7SF2	0.677362	2.09267	2.8576	0.0317049	0.112521	-4.15918	1.996267	1.511714	2.397066	2.465640
ACOX1	0.677277	2.83614	2.56105	0.0461607	0.143451	-4.55998	2.805847	2.189165	3.122243	3.227324
GPR39	0.677218	1.65494	3.55063	0.0138601	0.0677796	-3.26054	1.245325	1.387338	2.005122	1.981977
TAX1BP3	0.677215	4.71407	3.54504	0.0139488	0.0679959	-3.26752	4.430810	4.320123	5.101968	5.003396
SLC7A7	0.67684	0.685006	3.54482	0.0139522	0.0679959	-3.26779	0.3163034	0.3768689	0.9565248	1.0903285
C11orf71	0.676687	3.6034	3.60442	0.0130385	0.0653878	-3.19356	3.245395	3.284710	3.982491	3.900987
RIMS4	0.676621	0.383716	3.60947	0.0129642	0.0652189	-3.18729	0.06674747	0.02406285	0.75809266	0.68596058
RRAS	0.675582	4.38614	2.45541	0.0529153	0.155809	-4.70414	3.736032	4.360658	4.851283	4.596571
JAK3	0.674346	0.574717	3.27189	0.0191619	0.0825059	-3.61435	0.3635678	0.1115204	0.9902302	0.8335506
STRIP2	0.674328	1.79494	2.29098	0.0656091	0.179344	-4.92913	1.832159	1.083394	2.070553	2.193657
CCDC122	0.674323	0.96425	3.55104	0.0138536	0.0677736	-3.26002	0.6896424	0.5645350	1.2818433	1.3209809
OPTN	0.673798	3.56841	3.0326	0.0255493	0.0987092	-3.92653	3.346519	3.116504	3.738542	4.072077
PDF	0.672955	4.45715	2.2693	0.0675093	0.182479	-4.95881	3.780307	4.461031	4.971682	4.615565
ATG2A	0.671899	4.35607	2.07517	0.0873259	0.214466	-5.22389	4.457316	3.582925	4.747308	4.636731
NFE2	0.671871	1.56587	2.51906	0.0487281	0.148083	-4.61722	0.9124644	1.5474087	1.9208953	1.8827191
TNNC2	0.671722	0.972189	3.36657	0.0171422	0.077161	-3.49293	0.6773545	0.5953007	1.4219388	1.1941605
CEP170B	0.671506	4.06581	2.2503	0.0692219	0.185314	-4.9848	4.117198	3.342925	4.428605	4.374529
ABCA13	0.670409	0.425809	3.56481	0.0136381	0.0672854	-3.24284	0.13783391	0.04337401	0.74860377	0.77342285
PAGE1	0.670184	2.47427	2.25558	0.0687413	0.184755	-4.97758	1.763918	2.514433	2.721748	2.896972
C19orf71	0.670172	4.62244	1.60461	0.163952	0.3196	-5.84893	4.908294	3.666419	4.986246	4.928811
TUBAL3	0.669705	0.495424	3.36403	0.0171932	0.0772468	-3.49617	0.06445318	0.25668963	0.76012440	0.90042939
DNMT3A	0.669423	1.87074	2.5861	0.0446991	0.140056	-4.52588	1.835242	1.236813	2.190755	2.220146
COLGALT1	0.669263	6.30666	2.69976	0.0386652	0.127699	-4.37164	5.703050	6.240997	6.686745	6.595830
LYPD8	0.668731	0.64651	3.55458	0.0137978	0.0676036	-3.2556	0.3597998	0.2644889	0.9944788	0.9672710
SPRED2	0.667447	4.65914	1.45283	0.200621	0.3637	-6.03952	5.023322	3.627514	5.013898	4.971833
HTR7	0.667425	4.36092	3.32364	0.018027	0.0793015	-3.54783	4.153597	3.900826	4.704653	4.684620
SWSAP1	0.667364	2.51083	3.58262	0.0133648	0.0664499	-3.22066	2.174058	2.180245	2.867541	2.821490
UST	0.667312	1.777	3.42464	0.0160213	0.0738841	-3.41908	1.521844	1.364836	2.168999	2.052305
PSPH	0.666832	5.13667	2.31526	0.0635476	0.17613	-4.89589	4.448531	5.157982	5.559256	5.380922
MAP4	0.666689	5.26266	2.664	0.0404626	0.131396	-4.42007	5.205760	4.652875	5.631228	5.560785
TRIM9	0.666638	1.048	2.6682	0.0402472	0.131062	-4.41438	0.9910531	0.4383131	1.4079854	1.3546572
ZFPM1	0.666516	3.34564	3.24364	0.0198149	0.0843003	-3.65082	3.154019	2.870750	3.714333	3.643467
ARL4C	0.66641	2.63416	3.40405	0.016409	0.0747851	-3.44521	2.224153	2.377760	3.035584	2.899149
ADGRA3	0.666003	3.36433	2.175	0.076473	0.196807	-5.08777	3.429643	2.633016	3.626781	3.767884
ATP6V0C	0.665793	7.66438	3.12911	0.0227265	0.091854	-3.79975	7.486722	7.176243	8.072349	7.922203
SPC24	0.665714	3.51875	3.49766	0.0147264	0.0702435	-3.32692	3.213576	3.158209	3.914758	3.788453
TMEM229B	0.665696	3.22624	3.51152	0.014494	0.0697092	-3.30951	2.857807	2.928972	3.610999	3.507172
TMEM201	0.665563	3.05696	2.11704	0.0825916	0.207257	-5.16687	3.145042	2.303313	3.412395	3.367086
TRIM45	0.664608	2.15131	3.12641	0.0228005	0.0919498	-3.80327	1.981633	1.656372	2.538900	2.428321
ZNF516	0.664471	2.53119	2.45651	0.0528397	0.155757	-4.70263	2.517253	1.880659	2.937224	2.789630
FZD9	0.663101	1.56522	3.38431	0.0167908	0.0759803	-3.47032	1.190662	1.276684	1.991010	1.802538
S1PR3	0.662247	0.398876	3.41778	0.0161494	0.0741805	-3.42778	0.07896834	0.05653786	0.82094396	0.63905554
SIX1	0.662223	2.83851	3.4516	0.0155289	0.0723793	-3.38496	2.455617	2.559174	3.230334	3.108902
CACNG6	0.662147	2.19421	2.46468	0.0522822	0.154765	-4.69147	1.540773	2.185504	2.535322	2.515249
LTBP2	0.662101	1.85949	2.73887	0.0367979	0.12364	-4.3188	1.776051	1.280831	2.259683	2.121400
ACOX2	0.661772	1.71923	3.27135	0.0191741	0.0825306	-3.61504	1.304623	1.472063	1.946609	2.153621
FAM212B	0.661768	2.99653	3.20796	0.020675	0.0865288	-3.69703	2.517500	2.813788	3.344298	3.310526
ACAD8	0.661708	3.28753	2.90346	0.0299483	0.108431	-4.0979	3.158315	2.755035	3.704908	3.531859
ZFP36L1	0.661675	5.59542	1.14669	0.298751	0.465566	-6.39538	6.171114	4.358052	5.974519	5.877998
PTGES3L	0.661667	1.25469	3.42109	0.0160875	0.0740413	-3.42359	0.8460242	1.0016968	1.5412946	1.6297600
UBE2T	0.661569	3.8509	3.50262	0.0146427	0.070079	-3.32068	3.492846	3.547391	4.131792	4.231582
PANX2	0.661074	1.22524	2.99935	0.0266096	0.101034	-3.97047	1.0829778	0.7064241	1.6142168	1.4973340
ADAMTSL5	0.660966	2.65527	2.619	0.0428539	0.136017	-4.48114	2.607308	2.042272	2.957844	3.013668
PAPPA	0.660859	0.921401	3.19027	0.0211166	0.087732	-3.72	0.7140475	0.4678956	1.1620310	1.3416295
S100P	0.660351	2.4484	2.1111	0.083247	0.208452	-5.17497	1.700986	2.535458	2.750094	2.807052
TMEM171	0.660231	1.23324	3.0763	0.0242259	0.095294	-3.86898	0.8301969	0.9760537	1.7264316	1.4002808
GRB10	0.66013	3.67851	2.62131	0.0427279	0.135955	-4.47801	3.628324	3.068558	4.047408	3.969733
TRRAP	0.659717	3.88698	1.50145	0.188101	0.349068	-5.97931	4.218793	2.895449	4.219451	4.214225
STAC3	0.659714	1.56021	2.18791	0.0751758	0.194881	-5.07014	1.6208510	0.8398512	1.9473892	1.8327418
ATHL1	0.65948	3.23315	2.49383	0.0503435	0.151054	-4.65165	3.215798	2.591017	3.547568	3.578206
MSANTD3	0.659264	2.91408	3.059	0.0247404	0.0965624	-3.89173	2.759147	2.409749	3.194137	3.293287
LAMA5	0.659229	4.80601	1.18519	0.284424	0.452052	-6.3532	5.345404	3.607382	5.197533	5.073710
SP2	0.659046	4.39349	1.43157	0.20634	0.371018	-6.06558	4.761952	3.365972	4.775457	4.670560
SCAF4	0.65855	3.8919	1.27074	0.25472	0.421571	-6.2566	4.366510	2.758743	4.230901	4.211452
B3GALT4	0.65853	0.471367	3.32703	0.0179553	0.0792042	-3.54349	0.1279314	0.1562735	0.9133436	0.6879211
TKTL1	0.658525	0.497254	3.33626	0.0177616	0.0788393	-3.53166	0.05992195	0.27606064	0.80149582	0.85153705
TUBB3	0.65805	6.24221	1.85259	0.11761	0.259938	-5.52416	5.427793	6.398579	6.703555	6.438917
BRPF3	0.657874	3.32513	3.18683	0.0212039	0.0879803	-3.72448	3.134482	2.857913	3.711301	3.596842
TMSB4X	0.657696	8.42172	2.0461	0.0907784	0.220029	-5.26341	7.657795	8.527959	8.723543	8.777602
EML2	0.657623	4.62681	3.03229	0.0255589	0.0987092	-3.92694	4.112045	4.483954	4.960019	4.951226
PARP12	0.657531	3.10006	3.2516	0.0196283	0.0838646	-3.64053	2.649706	2.892883	3.482255	3.375396
OTUD7B	0.65751	4.39725	2.77235	0.0352773	0.12059	-4.27366	4.313401	3.823594	4.733990	4.718024
RGS12	0.656753	1.50205	3.39172	0.0166464	0.0756482	-3.46089	1.254130	1.093221	1.872662	1.788194
IL7	0.656045	1.2695	3.0321	0.025565	0.0987092	-3.92719	0.7587473	1.1242063	1.6220599	1.5729828
PCDH7	0.655297	0.504712	3.47517	0.0151122	0.0713381	-3.35521	0.1635966	0.1905305	0.8845661	0.7801545
GRIP2	0.655224	0.491029	3.51	0.0145192	0.0697366	-3.31141	0.1867669	0.1400670	0.8386771	0.7986051
CDC42BPG	0.655217	0.858751	3.46612	0.0152707	0.0717393	-3.36662	0.589418	0.472866	1.186047	1.186671
CYP27A1	0.654757	3.28016	2.89532	0.0302521	0.109006	-4.10876	2.741276	3.164280	3.642246	3.572823
ISG15	0.654714	5.13913	1.83042	0.121161	0.264818	-5.55372	4.320516	5.303027	5.595584	5.337388
CCDC106	0.654592	3.51688	3.02702	0.0257239	0.0989645	-3.93389	3.069801	3.309362	3.983835	3.704513
TCF7L1	0.654571	0.761636	2.89171	0.0303878	0.109372	-4.11357	0.6303447	0.2383555	1.0006241	1.1772178
SPSB2	0.654542	4.6922	2.53674	0.0476288	0.146227	-4.59311	4.070046	4.659818	5.059516	4.979433
GLI3	0.654383	2.66915	1.27889	0.252041	0.419085	-6.2472	3.133209	1.550706	3.036199	2.956482
SLC25A4	0.653269	6.01257	2.71857	0.0377548	0.125764	-4.34622	5.435384	5.936483	6.376554	6.301850
HIST1H4E	0.652958	1.84394	2.47175	0.0518048	0.153743	-4.68181	1.205916	1.829007	2.189370	2.151468
PLOD1	0.652957	6.51709	2.32734	0.0625471	0.174336	-4.87935	5.843527	6.537688	6.883662	6.803467
MC1R	0.652583	3.28073	3.29277	0.0186948	0.0810127	-3.58747	2.994861	2.914016	3.714481	3.499560
CAMK2A	0.652426	0.551238	3.45706	0.0154313	0.0721254	-3.37807	0.1704733	0.2795779	0.8871956	0.8677070
PROSER3	0.651876	1.9486	1.41261	0.211566	0.376916	-6.08867	2.3236284	0.9217039	2.3118968	2.2371883
SNTB2	0.651742	3.73911	1.80098	0.126039	0.27057	-5.59282	3.920425	2.906062	3.969581	4.160390
FAH	0.65166	2.8629	2.69855	0.0387248	0.127764	-4.37329	2.295631	2.778510	3.275076	3.102384
SLC22A4	0.651543	2.74969	3.4966	0.0147443	0.0702435	-3.32824	2.441113	2.406733	3.092898	3.058034
TBC1D16	0.650809	2.74961	3.4516	0.015529	0.0723793	-3.38497	2.375839	2.472576	3.098562	3.051470
POMK	0.650675	2.34762	1.64978	0.154346	0.307616	-5.79084	2.598644	1.445927	2.718332	2.627590
OCA2	0.650327	1.95077	2.70492	0.038413	0.127359	-4.36466	1.378676	1.872544	2.333896	2.217978
PDK4	0.650235	1.60668	2.77969	0.0349529	0.120026	-4.26377	1.517825	1.045301	1.930222	1.933374
MAGEA4	0.650048	9.20277	2.19281	0.0746886	0.194248	-5.06343	8.498925	9.256561	9.590080	9.465502
SLC2A13	0.649803	1.37607	3.3829	0.0168183	0.0760512	-3.47211	1.092805	1.009529	1.631170	1.770771
KAT7	0.649362	3.92473	1.38923	0.218181	0.3841	-6.11694	4.308281	2.891813	4.329576	4.169242
DPYSL5	0.649275	1.22226	2.95394	0.0281368	0.104597	-4.03069	0.7172518	1.0779937	1.6216849	1.4721102
WNK1	0.649263	3.8581	1.00059	0.358827	0.522748	-6.54728	4.555265	2.511680	4.030191	4.335280
INSR	0.649144	1.63426	2.68803	0.0392451	0.128783	-4.38752	1.566129	1.053257	1.957753	1.959921
EP300	0.649143	3.71032	0.974061	0.370738	0.532876	-6.57337	4.449223	2.322283	4.024322	4.045470
KRT14	0.648891	2.24708	2.68893	0.0392002	0.128711	-4.3863	1.668327	2.176934	2.542253	2.600790
CPTP	0.648372	4.62809	2.77248	0.0352713	0.12059	-4.27348	4.535729	4.072085	4.996980	4.907578
TBX2	0.648326	3.35459	3.38961	0.0166874	0.0757382	-3.46358	2.980259	3.080586	3.735545	3.621951
HUS1B	0.648299	1.1941	2.60716	0.0435084	0.137447	-4.49723	0.6050964	1.1348117	1.5911290	1.4453781
NME4	0.648295	2.99073	2.11916	0.082359	0.206917	-5.16398	2.277602	3.055572	3.423674	3.206090
CXCL11	0.648094	0.324047	3.29323	0.0186846	0.0810127	-3.58688	0.0000000	0.0000000	0.7560976	0.5400896
PLD5	0.647847	0.401442	3.39596	0.0165644	0.0753557	-3.4555	0.08353078	0.07150523	0.79733837	0.65339207
NCOR2	0.647444	4.36591	1.17086	0.289687	0.456671	-6.369	4.907119	3.177248	4.720066	4.659188
FOXD2	0.647249	1.32964	3.46844	0.0152299	0.0716557	-3.3637	1.002597	1.009425	1.682768	1.623753
TMEM259	0.647116	4.608	2.5439	0.0471911	0.145452	-4.58334	4.562800	4.006084	5.008500	4.854617
CRISPLD2	0.646547	0.530896	3.33082	0.0178755	0.0790571	-3.53863	0.2590696	0.1561740	0.9323957	0.7759428
AGTR1	0.646526	0.522326	3.41963	0.0161147	0.0740743	-3.42543	0.2138803	0.1842463	0.7889645	0.9022137
SH2B1	0.646049	4.24602	2.75884	0.0358822	0.121845	-4.29185	4.159240	3.686745	4.587275	4.550808
EPHX1	0.645423	3.53286	3.32161	0.0180701	0.0794363	-3.55043	3.133163	3.287137	3.910831	3.800315
SHROOM3	0.645362	2.14211	2.90638	0.0298399	0.108161	-4.094	2.021602	1.617263	2.464609	2.464980
KDM4E	0.645063	0.335111	3.46182	0.0153467	0.0719219	-3.37205	0.02515928	0.00000000	0.63664003	0.67864467
HEATR6	0.644804	3.98821	2.23926	0.0702385	0.186622	-4.99991	4.031434	3.300184	4.311280	4.309947
MYADM	0.644635	5.23096	2.61697	0.0429655	0.13627	-4.4839	5.154810	4.662473	5.661319	5.445233
C22orf23	0.644626	5.31517	1.21914	0.272291	0.440154	-6.31533	5.815292	4.170423	5.655612	5.619355
CDC42EP3	0.644337	4.45909	2.89872	0.0301247	0.108731	-4.10422	4.339620	3.934214	4.772870	4.789639
NOCT	0.644308	4.41039	2.65462	0.0409489	0.132436	-4.43279	4.339594	3.836874	4.797399	4.667686
SOGA1	0.643755	2.50289	1.64159	0.156045	0.309813	-5.80141	2.754659	1.607364	2.841861	2.807673
KCNE4	0.643561	0.451284	3.41129	0.0162715	0.0745253	-3.43601	0.1079488	0.1510588	0.7226990	0.8234309
PRKD2	0.643461	3.81532	3.27835	0.019016	0.0819947	-3.60603	3.388293	3.598882	4.140717	4.133379
BBS2	0.643434	3.78045	3.19911	0.0208946	0.0870924	-3.70851	3.584113	3.333360	4.075587	4.128756
RAB40B	0.643392	2.1543	3.36009	0.0172726	0.077394	-3.5012	1.843529	1.821673	2.399527	2.552460
BMF	0.643197	1.01123	3.45623	0.0154461	0.0721684	-3.37912	0.6801766	0.6990923	1.3491071	1.3165555
MBD6	0.642923	4.90952	1.19073	0.282412	0.450198	-6.34706	5.426130	3.749991	5.316835	5.145131
SLITRK1	0.642715	2.40053	2.41239	0.0559615	0.161726	-4.76295	2.392695	1.765644	2.771115	2.672655
CLTCL1	0.642478	1.74218	3.38907	0.0166978	0.0757382	-3.46426	1.404633	1.437258	2.002651	2.124196
SLC9A7	0.642367	1.99539	2.0193	0.0940846	0.224805	-5.29977	2.103329	1.245092	2.313224	2.319930
GLUL	0.642346	2.61775	2.38438	0.0580455	0.165696	-4.80128	1.972798	2.620355	2.955979	2.921865
RUSC1	0.642329	3.58725	2.97716	0.0273441	0.102605	-3.99986	3.089048	3.443126	3.952188	3.864643
IGF1R	0.641409	4.17046	1.52517	0.182264	0.341959	-5.94963	4.476239	3.223268	4.515755	4.466571
SPECC1	0.641022	1.72432	3.38905	0.0166983	0.0757382	-3.46429	1.363541	1.444085	2.001361	2.088310
BCR	0.640939	2.5204	3.33033	0.0178859	0.0790571	-3.53926	2.214961	2.184908	2.923178	2.758570
LPCAT4	0.640565	4.17722	3.06627	0.0245227	0.0960478	-3.88216	3.968081	3.745793	4.610988	4.384016
ATXN2	0.640297	2.74644	1.2377	0.265852	0.433276	-6.29436	3.228608	1.623976	3.069844	3.063334
SIRPA	0.640287	2.53011	3.32547	0.0179882	0.0792278	-3.54548	2.177015	2.242911	2.927736	2.772763
SLC22A18	0.640124	2.99781	3.33016	0.0178895	0.0790571	-3.53948	2.710791	2.644710	3.393096	3.242653
RABEP2	0.640051	2.99027	3.37839	0.0169072	0.076372	-3.47786	2.629545	2.710954	3.356971	3.263629
ARSG	0.639735	1.75407	3.31089	0.0182995	0.0799446	-3.56418	1.345805	1.522599	2.075167	2.072707
SMG7	0.639646	5.63329	1.45858	0.1991	0.362131	-6.03244	5.973592	4.653349	5.954229	5.952004
LDHD	0.639314	0.7592	3.21491	0.0205042	0.0861673	-3.68801	0.3298847	0.5492025	1.1223736	1.0353410
PLEK2	0.638058	0.413335	3.21255	0.020562	0.0863253	-3.69107	0.10977880	0.07883349	0.84816789	0.61655952
CTSA	0.638029	5.48398	2.49633	0.0501808	0.150778	-4.64824	4.877809	5.452118	5.854428	5.751557
FKRP	0.63736	4.13226	3.14458	0.0223066	0.090789	-3.77952	3.722776	3.904377	4.550518	4.351355
ZNF142	0.637339	3.29677	1.47872	0.19386	0.356036	-6.00756	3.623920	2.332281	3.591016	3.639863
IQSEC2	0.637015	1.4381	3.14417	0.0223178	0.090789	-3.78006	1.2539575	0.9852358	1.7605327	1.7526910
FAM155B	0.636749	1.80474	3.16716	0.0217095	0.089411	-3.75007	1.448754	1.523978	2.245265	2.000966
LPIN3	0.636736	1.51743	3.3614	0.0172462	0.0773568	-3.49953	1.260005	1.138120	1.826245	1.845353
ABR	0.63673	5.51059	3.25927	0.0194505	0.0834396	-3.63062	5.096999	5.287442	5.861236	5.796664
USF1	0.636543	4.58973	2.92845	0.0290359	0.106454	-4.06458	4.083893	4.459029	4.910429	4.905578
CFAP52	0.63625	0.711284	2.60929	0.04339	0.137242	-4.49434	0.6237855	0.1625314	0.9040461	1.1547711
PLPP4	0.635895	3.15517	2.17726	0.0762445	0.196501	-5.08469	2.480243	3.194199	3.586380	3.359851
TMPRSS5	0.635744	3.63557	3.31378	0.0182375	0.0798459	-3.56048	3.247757	3.387631	3.991713	3.915164
PABPN1	0.635694	3.74452	2.63509	0.0419822	0.13426	-4.4593	3.175861	3.677492	4.112530	4.012210
RHCE	0.635413	1.00794	3.27828	0.0190175	0.0819947	-3.60611	0.6144769	0.7659833	1.2734716	1.3778138
UNC119	0.635165	4.53048	2.84884	0.0320532	0.113016	-4.17092	4.030940	4.394851	4.942285	4.753837
CORO2A	0.634983	2.60159	3.40645	0.0163633	0.0747811	-3.44216	2.309819	2.258372	2.922164	2.915992
C11orf24	0.634959	6.4155	3.23618	0.0199913	0.0847066	-3.66046	6.023144	6.172900	6.806592	6.659370
MANBA	0.634436	2.51423	2.51609	0.0489153	0.148405	-4.62127	2.450315	1.943709	2.704463	2.958432
ABCA2	0.634181	3.84362	2.78309	0.0348037	0.119674	-4.25919	3.741368	3.311684	4.204808	4.116606
MTFMT	0.634061	2.52378	3.32297	0.0180412	0.0793366	-3.54869	2.192557	2.220935	2.911931	2.769684
STIM2	0.633987	2.61453	2.6569	0.0408303	0.132287	-4.4297	2.535408	2.059657	2.858278	3.004761
AAK1	0.633564	2.22729	1.19182	0.282019	0.449771	-6.34585	2.733493	1.087520	2.456128	2.632013
CTNNB1	0.633332	6.69428	2.35612	0.0602314	0.170117	-4.83996	6.696711	6.058511	6.961794	7.060093
UNC13A	0.633211	1.7524	3.14405	0.022321	0.090789	-3.78022	1.564754	1.306827	2.059235	2.078768
PCDHB13	0.632697	1.20872	2.30933	0.0640448	0.176815	-4.90401	1.1517307	0.6330145	1.7365506	1.3135882
HDAC5	0.632182	4.80075	2.30822	0.0641377	0.176957	-4.90552	4.152545	4.816777	5.156215	5.077471
ZNF576	0.632169	3.24101	2.13119	0.0810523	0.20476	-5.14758	2.554809	3.295041	3.660517	3.453671
FBXO43	0.631841	1.19846	2.26431	0.0679552	0.183238	-4.96564	1.2284552	0.5366154	1.5228556	1.5058974
CLDN23	0.63176	1.15872	2.80167	0.0340011	0.117655	-4.2342	0.6304318	1.0552425	1.4710972	1.4780975
CCDC136	0.631591	2.21848	2.27895	0.0666565	0.181208	-4.9456	2.238818	1.566553	2.596124	2.472428
PAQR7	0.631197	3.90458	3.30884	0.0183438	0.0800002	-3.56682	3.522566	3.655393	4.248385	4.191967
HOXB8	0.63114	3.23174	2.82727	0.0329285	0.115152	-4.19983	3.104587	2.727744	3.629915	3.464696
RAB6B	0.630766	0.898712	3.15857	0.0219346	0.0900563	-3.76127	0.4615845	0.7050737	1.2093752	1.2188144
MYL10	0.630517	0.374944	3.07373	0.0243016	0.0954744	-3.87236	0.0000000	0.1193712	0.5584709	0.8219337
TMEM94	0.630036	4.13742	1.59221	0.166688	0.322543	-5.86477	4.402978	3.241827	4.455537	4.449340
HMCN2	0.62907	0.370395	3.2664	0.0192869	0.0829046	-3.62143	0.04156325	0.07015731	0.76821468	0.60164513
FAM189B	0.628679	4.19927	2.03734	0.0918455	0.221649	-5.2753	4.283168	3.486690	4.608791	4.418426
KLHL12	0.627875	5.33288	2.9362	0.0287593	0.105956	-4.05427	5.183654	4.854225	5.584692	5.708938
NPB	0.627856	1.90051	2.82777	0.0329079	0.115137	-4.19916	1.786149	1.387022	2.246460	2.182424
PPM1J	0.62775	1.42114	3.05483	0.0248664	0.0968602	-3.89723	0.9672517	1.2472751	1.7765361	1.6934901
TSSK6	0.62761	3.66304	2.15936	0.0780757	0.199806	-5.10913	3.711022	2.987443	4.061053	3.892633
ZBTB45	0.627207	3.57016	3.25221	0.0196142	0.0838634	-3.63974	3.186408	3.326701	3.933812	3.833712
CDH15	0.626446	0.77522	3.3183	0.0181406	0.0794782	-3.55468	0.4417053	0.4822887	1.1406394	1.0362469
CMPK2	0.626429	0.770793	3.29161	0.0187204	0.0810864	-3.58896	0.5242154	0.3909416	1.1011173	1.0668979
BRI3BP	0.626168	3.48442	2.8535	0.0318672	0.112792	-4.16466	3.364366	2.978307	3.776811	3.818199
OAF	0.625947	5.76951	2.38434	0.0580482	0.165696	-4.80133	5.162366	5.750700	6.174638	5.990321
POMZP3	0.625771	4.00998	3.22771	0.0201938	0.0852274	-3.67143	3.778965	3.615223	4.365421	4.280310
SLC25A29	0.625748	3.39006	3.24331	0.0198226	0.0843003	-3.65124	3.127149	3.027226	3.773745	3.632126
CCNK	0.625414	1.74338	2.27686	0.0668403	0.181419	-4.94846	1.741474	1.119873	2.184412	1.927763
HIC1	0.625385	0.680171	2.68424	0.0394346	0.129206	-4.39265	0.5494669	0.1854901	1.1394608	0.8462655
ITGB8	0.62537	2.45453	2.25815	0.0685089	0.184208	-4.97406	2.425893	1.857801	2.577960	2.956474
SEMA6A	0.625125	0.895083	2.75197	0.0361946	0.122416	-4.30113	0.7997212	0.3653185	1.2130264	1.2022640
RAB11FIP1	0.624741	3.0069	3.06406	0.0245888	0.0961302	-3.88508	2.834174	2.554894	3.314991	3.323559
LRIG1	0.624711	2.25585	3.23298	0.0200675	0.0848622	-3.6646	2.029435	1.857560	2.589186	2.547232
ID2	0.623973	1.43949	2.77236	0.0352765	0.12059	-4.27364	1.235797	1.019208	1.570169	1.932781
NADSYN1	0.623677	3.50257	3.25169	0.0196262	0.0838646	-3.64041	3.125296	3.256171	3.859390	3.769432
SAMD11	0.623497	1.23938	3.23748	0.0199603	0.0846328	-3.65878	0.8619841	0.9932721	1.6043272	1.4979238
PYGO2	0.623331	6.33123	3.24356	0.0198166	0.0843003	-3.65091	6.079320	5.959800	6.698842	6.586941
PREX1	0.621935	3.32646	2.98471	0.0270917	0.102197	-3.98985	2.866378	3.164607	3.686243	3.588613
CEP19	0.621831	1.49485	3.22723	0.0202054	0.0852478	-3.67205	1.109350	1.258521	1.764799	1.846734
C3orf70	0.62182	0.999073	2.56231	0.0460861	0.143254	-4.55826	0.9362485	0.4400775	1.2338348	1.3861315
CCDC51	0.621125	5.63679	2.08827	0.0858156	0.212376	-5.20607	4.950113	5.702337	6.034222	5.860477
SPTAN1	0.620961	5.50844	2.35802	0.0600814	0.169945	-4.83735	5.506953	4.888957	5.845976	5.791856
GABRE	0.620744	0.881157	2.83058	0.0327926	0.114891	-4.19539	0.7572052	0.3843646	1.2441401	1.1389176
CORO1A	0.620126	0.694314	3.03735	0.0254016	0.0984297	-3.92026	0.2769695	0.4915331	1.0955714	0.9131835
TIAM1	0.619948	1.62247	2.4794	0.0512933	0.152748	-4.67135	1.559761	1.065228	1.805094	2.059791
HENMT1	0.619902	1.689	2.76975	0.0353925	0.120782	-4.27715	1.539860	1.218232	1.867878	2.130018
BHMG1	0.619797	0.354216	3.2806	0.0189655	0.0818531	-3.60313	0.0000000	0.0886358	0.7004563	0.6277727
CLSTN3	0.61918	2.84354	2.55471	0.0465386	0.144171	-4.56861	2.792655	2.275250	3.152638	3.153627
ADNP2	0.619178	3.83181	2.71477	0.0379367	0.126234	-4.35135	3.736826	3.307622	4.093338	4.189467
RTN1	0.618674	0.382038	3.31162	0.0182839	0.0799364	-3.56325	0.07835005	0.06705311	0.72401045	0.65874001
INHBE	0.618436	2.64517	2.61258	0.0432078	0.136801	-4.48987	2.095697	2.576204	2.995951	2.912821
UBASH3B	0.618272	3.37666	2.14313	0.0797763	0.202977	-5.13128	3.430819	2.704223	3.635300	3.736285
UBR4	0.618238	5.45731	1.54525	0.177458	0.336025	-5.92436	5.736933	4.559456	5.777040	5.755825
LHX1	0.617987	2.51606	2.78113	0.0348895	0.119899	-4.26183	2.409531	2.004598	2.833542	2.816561
BRD4	0.617778	5.06426	1.71997	0.1405	0.289621	-5.69955	5.255283	4.255468	5.478268	5.268038
GPX1	0.617543	9.30673	1.40569	0.213505	0.378904	-6.09706	8.340292	9.655627	9.687050	9.543955
GLS2	0.617301	1.65446	1.80607	0.125182	0.269454	-5.58607	1.8175940	0.8740154	2.0317887	1.8944236
FURIN	0.617138	5.39893	3.28616	0.0188413	0.0814547	-3.59598	5.088812	5.091919	5.753422	5.661584
ITPKB	0.617067	3.14198	2.97787	0.0273203	0.102575	-3.99892	2.690993	2.975906	3.505265	3.395769
RTKN	0.616718	3.91895	2.78685	0.0346399	0.119272	-4.25414	3.424139	3.797038	4.299322	4.155292
DEXI	0.616711	4.11744	3.20488	0.0207512	0.0867381	-3.70103	3.733090	3.885081	4.460385	4.391210
PIK3C2B	0.616579	1.14112	2.67367	0.0399678	0.130397	-4.40697	1.0323112	0.6333559	1.5579583	1.3408671
EHD3	0.61613	5.17947	2.35279	0.0604943	0.170472	-4.84451	4.576257	5.166562	5.571017	5.404063
OR8G5	0.615905	1.61153	3.30234	0.0184848	0.0803291	-3.57516	1.276330	1.330817	1.913874	1.925082
ZNF274	0.615903	4.5087	3.02928	0.0256531	0.0988645	-3.93091	4.327619	4.073869	4.869297	4.763997
SLC47A1	0.615228	0.974012	3.2653	0.019312	0.0829844	-3.62284	0.6201622	0.7126347	1.3063511	1.2569017
CFAP73	0.615159	0.645112	3.28523	0.0188619	0.0814885	-3.59716	0.3757520	0.2993139	0.9616894	0.9436943
MAPRE3	0.615025	4.579	2.84962	0.0320218	0.112964	-4.16986	4.120799	4.422185	4.989666	4.783368
HERPUD2	0.614557	3.59726	2.30367	0.0645224	0.17773	-4.91175	3.606836	2.973119	3.933480	3.875589
E2F2	0.614519	1.38275	3.11283	0.0231775	0.0928552	-3.82106	1.003879	1.147106	1.774927	1.605096
DOPEY2	0.614516	1.18309	2.47816	0.051376	0.152897	-4.67305	1.1447379	0.6069169	1.4434006	1.5372856
HOXA4	0.614094	3.61132	2.14165	0.0799332	0.203258	-5.1333	3.664864	2.943673	3.959886	3.876839
NTN3	0.613949	0.834412	2.55425	0.0465663	0.144221	-4.56924	0.7677578	0.2871178	1.0607510	1.2220225
TSSK4	0.613864	1.90628	1.8232	0.122338	0.266382	-5.56332	2.065128	1.133565	2.184926	2.241496
ZNF436	0.613776	2.84511	2.65035	0.0411727	0.132757	-4.43859	2.747599	2.328848	3.057261	3.246738
ERC1	0.613331	2.79124	2.11433	0.0828901	0.207802	-5.17057	2.841926	2.127224	3.001052	3.194760
CKB	0.612564	7.03695	1.77683	0.130188	0.276303	-5.62477	6.252751	7.208586	7.410348	7.276117
DGKG	0.612473	1.63518	3.16865	0.0216709	0.0893382	-3.74814	1.403840	1.254047	1.989175	1.893658
NPIPA1	0.611336	3.49821	1.34228	0.232046	0.398259	-6.17303	3.883510	2.501568	3.811099	3.796652
TPST1	0.611235	2.90073	2.93474	0.028811	0.106037	-4.05621	2.470614	2.719608	3.301243	3.111449
CPOX	0.610531	4.04868	2.58134	0.0449731	0.14065	-4.53236	3.983966	3.502854	4.317554	4.390327
KRTAP19.5	0.61003	0.708058	1.98631	0.0983264	0.231565	-5.34445	0.8060856	0.0000000	1.0652959	0.9608495
NKX2.2	0.610022	0.744626	3.22663	0.0202198	0.0852807	-3.67283	0.4601328	0.4190968	0.9948622	1.1044117
FAM134C	0.609834	3.53783	2.76893	0.0354295	0.120782	-4.27827	3.062340	3.403483	3.940572	3.744920
CSNK2B	0.609681	4.90572	1.9262	0.106563	0.244085	-5.42553	5.025857	4.175898	5.238024	5.183092
ATXN1	0.609608	1.9646	2.02439	0.0934469	0.223767	-5.29286	2.051009	1.268583	2.223925	2.314884
CNPY4	0.609482	3.83558	2.49784	0.0500832	0.150626	-4.64618	3.268360	3.793308	4.125078	4.155555
NR1H3	0.6089	1.89397	2.27513	0.0669923	0.181538	-4.95082	1.271794	1.907242	2.237897	2.158940
ZBTB3	0.608584	1.53063	2.64958	0.0412132	0.132784	-4.43963	1.388683	1.063987	1.989989	1.679849
ZNF513	0.608471	4.85463	2.73281	0.0370809	0.124134	-4.32698	4.357573	4.743223	5.225450	5.092288
KIF20A	0.608233	3.70339	3.1834	0.0212909	0.0882555	-3.72893	3.328685	3.469872	4.030797	3.984225
AKIRIN1	0.608106	5.9387	3.00907	0.0262949	0.100346	-3.95762	5.764866	5.504426	6.265996	6.219508
ZNF503	0.60809	2.55796	3.13278	0.0226261	0.0915819	-3.79495	2.210013	2.297814	2.944672	2.779335
ASB16	0.607969	1.33855	2.31657	0.0634383	0.175961	-4.8941	1.3425665	0.7265562	1.6358647	1.6491962
PINK1	0.6075	3.14969	1.77075	0.131253	0.277799	-5.6328	2.373325	3.318554	3.533199	3.373680
SLC12A6	0.607397	2.33358	1.48349	0.192637	0.354453	-6.00165	2.628396	1.431358	2.540339	2.734210
EXTL3	0.607175	2.89364	2.89598	0.0302274	0.108948	-4.10788	2.446059	2.734041	3.270514	3.123936
CEP85	0.607053	3.90364	3.1782	0.0214241	0.0886353	-3.7357	3.658848	3.541380	4.252050	4.162284
UXS1	0.606636	1.6237	3.2449	0.0197853	0.0842537	-3.64919	1.323365	1.317408	1.962011	1.892036
SYT11	0.606502	5.07499	2.96091	0.0278961	0.104126	-4.02142	4.633185	4.910302	5.415434	5.341056
FCHO1	0.606026	0.674953	3.13021	0.0226962	0.0917896	-3.7983	0.4390589	0.3048207	0.9169685	1.0389636
P3H1	0.605987	4.07058	2.91561	0.0295007	0.107358	-4.08169	3.635718	3.899447	4.454925	4.292214
PGP	0.60565	3.90085	2.36853	0.0592608	0.168219	-4.82297	3.334999	3.861060	4.330518	4.076841
CDK5R1	0.605555	2.53567	3.00058	0.0265694	0.100981	-3.96884	2.316731	2.149063	2.939239	2.737665
SEPT6	0.605436	1.47621	2.73986	0.0367518	0.123549	-4.31746	1.3722908	0.9746905	1.7731484	1.7847045
CCDC80	0.605347	1.54141	3.11121	0.0232228	0.0929204	-3.82317	1.195838	1.281640	1.930218	1.757954
RPRD2	0.605077	3.88002	1.08326	0.323707	0.489369	-6.46298	4.452379	2.702575	4.154400	4.210708
ALDH3A2	0.605026	2.99244	3.23878	0.0199297	0.0845869	-3.6571	2.662362	2.717489	3.276938	3.312965
FBXL20	0.604803	1.95571	2.05239	0.0900193	0.218645	-5.25486	2.033000	1.273627	2.239573	2.276659
DRAP1	0.604164	8.0331	2.24488	0.0697194	0.185899	-4.99223	7.411923	8.050121	8.389052	8.281321
FAM234B	0.60407	2.68695	3.08995	0.0238279	0.0943467	-3.85104	2.460791	2.309045	3.056062	2.921914
NFATC1	0.603596	1.09582	2.54817	0.0469322	0.144898	-4.57752	1.0378046	0.5502424	1.4127360	1.3825038
MPV17L	0.60345	2.69765	1.71203	0.142003	0.291669	-5.70993	2.892363	1.899494	2.962827	3.035930
BCOR	0.602953	4.02449	1.49349	0.190099	0.351642	-5.98922	4.317520	3.128502	4.362640	4.289289
TBC1D10B	0.602061	2.64619	3.23169	0.0200984	0.0849649	-3.66628	2.363242	2.327073	2.962523	2.931913
STK10	0.602013	4.58057	2.77407	0.0352009	0.120522	-4.27134	4.099087	4.460043	4.928433	4.834724
OSBPL10	0.601863	4.31349	3.21038	0.0206154	0.086436	-3.69389	4.042826	3.982282	4.643703	4.585130
AFAP1L2	0.601621	2.16191	2.99756	0.026668	0.101226	-3.97283	1.977046	1.745146	2.512810	2.412625
PSD4	0.601446	1.69296	2.81746	0.0333353	0.116116	-4.213	1.218550	1.565932	1.974008	2.013366
TAF4	0.601384	2.28917	1.15482	0.295676	0.46252	-6.38654	2.796839	1.180110	2.600075	2.579642
TSLP	0.601177	3.35638	2.49687	0.0501461	0.150709	-4.6475	3.301376	2.810206	3.589981	3.723955
FOXP4	0.601165	2.93693	1.5746	0.170652	0.327181	-5.8872	3.190329	2.082367	3.255440	3.219587
OXSR1	0.60055	5.23897	1.58109	0.16918	0.325726	-5.87893	5.470865	4.406517	5.398207	5.680275
GCLM	0.600012	1.64291	3.1719	0.0215865	0.0891055	-3.7439	1.348602	1.337200	1.883753	2.002072
ZNF414	0.59988	3.00566	2.46607	0.0521879	0.154593	-4.68957	2.843468	2.567979	3.527283	3.083924
TNFAIP8L1	0.599459	1.50333	3.20958	0.020635	0.0864704	-3.69492	1.174328	1.232869	1.816889	1.789226
FOXA1	0.599091	1.39374	2.04807	0.0905404	0.219619	-5.26074	1.4672403	0.7211452	1.7360517	1.6505164
NTAN1	0.598819	2.1889	1.76446	0.132366	0.279139	-5.6411	1.437358	2.341627	2.623726	2.352898
LTA4H	0.598113	3.87929	2.30202	0.064663	0.177868	-4.91402	3.828255	3.332221	4.006256	4.350446
ATP10B	0.597725	1.13072	2.58172	0.0449507	0.140614	-4.53183	1.0596601	0.6040598	1.4005651	1.4586050
OR7C1	0.597632	0.32898	3.06741	0.0244889	0.0960418	-3.88067	0.0603278	0.0000000	0.5348853	0.7207060
SLC25A42	0.597437	3.21674	3.19882	0.0209019	0.0870946	-3.70889	2.917873	2.918163	3.547771	3.483141
FOLR1	0.597416	0.560394	2.81124	0.0335958	0.116745	-4.22135	0.09152759	0.43184413	0.88080057	0.83740295
YBX3	0.597322	5.69107	3.13197	0.0226481	0.0916242	-3.796	5.405068	5.379759	6.060453	5.919018
SGK223	0.597038	1.96522	2.27693	0.0668339	0.181419	-4.94836	1.955572	1.377828	2.369229	2.158246
RASSF4	0.59696	1.83779	2.9999	0.0265919	0.100997	-3.96975	1.446153	1.632466	2.209678	2.062862
NIT1	0.596894	5.13441	2.25415	0.0688717	0.185028	-4.97954	4.523309	5.148621	5.457063	5.408655
RGAG1	0.596846	0.433488	3.18847	0.0211621	0.0878829	-3.72233	0.1155554	0.1545739	0.7650461	0.6987758
NLRP2	0.5968	1.06933	2.92248	0.029251	0.106783	-4.07254	0.6301064	0.9117504	1.3743280	1.3611284
AUNIP	0.596731	2.83691	2.97867	0.0272935	0.102565	-3.99786	2.496257	2.580839	3.252568	3.017990
ZC3H3	0.596723	3.48321	1.99566	0.0971048	0.229406	-5.3318	3.573071	2.796618	3.811276	3.751859
ITGA7	0.596708	2.79386	3.20527	0.0207415	0.0867371	-3.70052	2.474958	2.516054	3.092983	3.091445
SCARB1	0.596635	4.15464	2.8104	0.033631	0.116836	-4.22247	3.733062	3.979586	4.571195	4.334724
ACTL10	0.596628	3.07707	1.8877	0.112204	0.252039	-5.47722	2.367131	3.190385	3.480855	3.269918
CYP4X1	0.59634	0.500334	3.03347	0.0255221	0.0986926	-3.92538	0.2523472	0.1519817	0.7040629	0.8929458
ADM2	0.596178	3.80903	2.97797	0.0273169	0.102575	-3.99879	3.596918	3.424960	4.196557	4.017676
PLEKHA4	0.596139	3.42856	2.65966	0.0406872	0.131957	-4.42596	2.932279	3.328694	3.791146	3.662106
MAPK8IP3	0.595942	4.33731	2.01691	0.0943855	0.225439	-5.30301	4.420839	3.657837	4.651122	4.619438
ACTL8	0.594893	2.7544	1.83952	0.119691	0.262846	-5.5416	2.017084	2.896814	3.057387	3.046299
CRB2	0.594796	0.354249	3.13821	0.0224786	0.0910823	-3.78785	0.09150407	0.02219745	0.70377063	0.59952202
INTS1	0.594515	6.05116	1.38244	0.22014	0.386468	-6.12512	6.397426	5.110381	6.384131	6.312707
FAM50B	0.594486	3.2929	2.24463	0.0697427	0.185922	-4.99257	2.683109	3.308200	3.617134	3.563146
CRABP2	0.593975	1.46441	2.80302	0.0339437	0.117539	-4.23239	1.246926	1.087922	1.611747	1.911052
GNG11	0.593942	6.0999	1.86793	0.115217	0.2566	-5.50368	5.374219	6.231633	6.407330	6.386405
GRM8	0.593853	0.6129	3.15414	0.0220518	0.0902685	-3.76706	0.3641532	0.2677938	0.8929103	0.9267425
PAPD7	0.593803	3.88815	1.65687	0.152889	0.305955	-5.78168	4.100548	3.081946	4.185965	4.184135
CALM1	0.593626	5.18826	2.66439	0.0404427	0.131364	-4.41955	5.030359	4.752537	5.335082	5.635066
GSTM2	0.593542	1.12317	3.17894	0.0214051	0.0885851	-3.73474	0.8575351	0.7952602	1.4238882	1.4159920
ELMO2	0.593434	4.05086	2.93465	0.0288144	0.106037	-4.05634	3.633876	3.874405	4.403910	4.291239
CDA	0.593338	0.709627	2.82393	0.0330661	0.115438	-4.20431	0.3776557	0.4482598	0.8469892	1.1656016
RAB43	0.593217	0.968885	2.79628	0.0342319	0.118249	-4.24145	0.5075848	0.8369680	1.3087785	1.2222087
DCAF5	0.59316	3.35009	2.29299	0.0654353	0.179145	-4.92637	3.352584	2.754431	3.654054	3.639282
DNAH17	0.593111	0.777873	3.06432	0.024581	0.0961302	-3.88473	0.5715191	0.3911152	1.0802788	1.0685778
TSPAN33	0.592593	2.40915	2.85212	0.0319222	0.112831	-4.16652	1.960860	2.264850	2.734174	2.676723
PHACTR1	0.592481	0.498405	3.08049	0.0241029	0.0950735	-3.86347	0.2788392	0.1254900	0.7631659	0.8261250
ZNF536	0.591798	1.17755	3.02301	0.0258503	0.099361	-3.93919	0.9776674	0.7856387	1.5098971	1.4370051
OTX1	0.591453	0.994982	2.61937	0.0428337	0.136017	-4.48064	0.8974962	0.5010152	1.2119079	1.3695086
SLC16A8	0.591416	1.06343	2.05889	0.0892428	0.217405	-5.24603	1.1315907	0.4038539	1.3463204	1.3719566
ANKRD11	0.591384	5.30213	1.19362	0.281367	0.449239	-6.34385	5.769681	4.243192	5.597360	5.598281
NUMA1	0.59085	5.21322	3.1506	0.0221458	0.0904288	-3.77167	4.894134	4.941467	5.544394	5.472906
RAB17	0.590652	2.28273	2.71344	0.0380007	0.126353	-4.35315	1.891473	2.083326	2.740411	2.415693
RNF182	0.589921	2.50228	2.37411	0.0588296	0.167255	-4.81533	2.465874	1.948764	2.705799	2.888682
ZBTB7A	0.589675	3.85983	2.91825	0.0294047	0.107104	-4.07818	3.685892	3.444096	4.208068	4.101269
DAAM2	0.58899	2.84089	3.02821	0.0256866	0.09891	-3.93232	2.450685	2.642105	3.130373	3.140398
SH3BP1	0.588301	3.25939	2.95967	0.0279389	0.104164	-4.02308	2.864791	3.065684	3.614648	3.492428
BTBD11	0.588259	1.79323	2.76948	0.0354047	0.120782	-4.27752	1.407324	1.590869	2.231864	1.942847
SDK2	0.588194	0.432253	3.14003	0.0224292	0.0910142	-3.78547	0.1417320	0.1345811	0.7663837	0.6863171
SLC24A1	0.587961	2.38848	2.2516	0.0691037	0.185228	-4.98303	2.392953	1.796052	2.619692	2.745234
MAP1A	0.587959	1.07503	2.60868	0.0434239	0.137291	-4.49517	0.9656604	0.5964389	1.4734725	1.2645452
LIMK2	0.587699	3.10442	2.33042	0.0622951	0.174051	-4.87514	2.529180	3.091966	3.432229	3.364315
ACTL9	0.587123	0.313963	2.79765	0.034173	0.118078	-4.23961	0.0408036	0.0000000	0.7685249	0.4465242
GSE1	0.58703	3.24596	1.45238	0.200742	0.363868	-6.04008	3.548952	2.355938	3.539667	3.539283
SCAMP5	0.586721	3.72097	2.87464	0.0310392	0.11106	-4.13638	3.288204	3.567015	4.032192	3.996468
BPHL	0.586155	1.01379	3.10213	0.0234791	0.0935946	-3.83507	0.6672804	0.7741456	1.3282094	1.2855273
NKX3.1	0.586138	1.15661	2.91088	0.0296741	0.107687	-4.088	0.8993204	0.8277644	1.5737924	1.3255675
F2RL2	0.586025	2.30768	2.01552	0.0945618	0.225717	-5.3049	2.374990	1.654348	2.509427	2.691961
ACTRT3	0.585961	0.784555	2.97663	0.0273621	0.10261	-4.00057	0.5976825	0.3854657	1.0558728	1.0991979
OXCT2	0.585813	1.04952	2.47712	0.0514448	0.15297	-4.67446	0.9945651	0.5186660	1.2920845	1.3927732
TRIM6	0.585692	0.953036	2.94588	0.0284176	0.105182	-4.04139	0.7369062	0.5834739	1.1565091	1.3352558
SMURF1	0.585557	3.66852	3.00122	0.0265487	0.100981	-3.96799	3.465415	3.286078	4.003684	3.918923
ADGRF4	0.585541	0.31245	3.07957	0.0241298	0.0951128	-3.86468	0.0000000	0.0393587	0.5406974	0.6697424
ZSCAN5B	0.584938	0.292469	3.03858	0.0253635	0.0983768	-3.91864	0.0000000	0.0000000	0.6689083	0.5009683
CHPF2	0.584666	5.33103	3.02198	0.0258829	0.0994121	-3.94055	4.999899	5.077501	5.704464	5.542269
CYGB	0.584154	0.476573	3.12043	0.0229656	0.0923742	-3.8111	0.2038422	0.1651499	0.7351950	0.8021053
MILR1	0.584097	0.337289	3.06733	0.0244911	0.0960418	-3.88077	0.0904814	0.0000000	0.6823116	0.5763630
STAT5A	0.584043	3.72131	2.32132	0.063044	0.175262	-4.8876	3.153335	3.705243	4.071381	3.955284
CAMK1G	0.58394	0.303831	2.88221	0.0307487	0.110272	-4.12627	0.02372216	0.00000000	0.72969423	0.46190832
KAZALD1	0.583852	3.6321	2.55955	0.0462502	0.143625	-4.56203	3.128637	3.551705	3.984481	3.863564
KIF5A	0.583811	1.68507	2.59639	0.0441127	0.138781	-4.51187	1.601293	1.185031	2.008826	1.945120
GXYLT2	0.583383	1.57428	2.17787	0.076182	0.196454	-5.08385	1.5931763	0.9719976	1.7860366	1.9459043
SNAP47	0.58295	5.01955	2.70274	0.0385195	0.127514	-4.36762	4.547670	4.908477	5.336280	5.285767
CANT1	0.582932	4.90464	2.14443	0.0796388	0.202832	-5.12951	4.286752	4.939588	5.243202	5.149003
PRR19	0.582887	0.751603	2.2344	0.0706911	0.187318	-5.00657	0.7639834	0.1563349	1.0249357	1.0611560
TMEM179B	0.582282	2.50097	2.9819	0.0271853	0.102339	-3.99358	2.218171	2.201482	2.891837	2.692381
FOXL1	0.582218	1.68187	3.02908	0.0256593	0.0988645	-3.93118	1.468512	1.313003	1.999299	1.946652
TMEM169	0.582031	1.32317	2.98436	0.0271034	0.102211	-3.99032	1.1296347	0.9346727	1.6299465	1.5984221
USP35	0.581551	1.9624	2.818	0.0333126	0.116077	-4.21227	1.813318	1.529925	2.300557	2.205787
CLASP1	0.581264	3.4402	1.68511	0.147216	0.298305	-5.74504	3.605751	2.693393	3.572178	3.889494
ZFP41	0.5812	2.89409	2.1777	0.0761991	0.196458	-5.08408	2.912002	2.294981	3.263599	3.105783
FHOD1	0.581172	4.10332	3.08494	0.0239732	0.0947078	-3.85763	3.847250	3.778216	4.433061	4.354749
SNAP29	0.581128	3.06598	2.99343	0.0268034	0.101582	-3.9783	2.866228	2.684595	3.379867	3.333212
SFRP5	0.580967	0.488289	3.08988	0.0238301	0.0943467	-3.85115	0.1494337	0.2461781	0.7771341	0.7804110
ALPPL2	0.580461	0.338388	3.09236	0.0237585	0.0942323	-3.84788	0.04665387	0.04966011	0.67349505	0.58374160
KDM5B	0.580317	4.39604	1.5997	0.165031	0.32044	-5.85521	4.615183	3.596585	4.592810	4.779592
ISL2	0.580308	1.93128	2.62335	0.0426164	0.135769	-4.47523	1.765937	1.516323	2.065663	2.377212
TMEM106A	0.580284	2.17351	2.73827	0.0368256	0.123667	-4.3196	1.750596	2.016143	2.569010	2.358297
PIK3R3	0.580214	1.40289	2.77332	0.0352342	0.12059	-4.27236	1.191796	1.033772	1.553919	1.832077
C8orf46	0.580213	0.73521	3.11014	0.0232529	0.0930018	-3.82457	0.4264624	0.4637451	1.0471700	1.0034642
SCD5	0.579964	1.48499	3.03154	0.0255823	0.0987462	-3.92792	1.250089	1.139932	1.827436	1.722513
PATL1	0.579722	5.028	1.3661	0.224916	0.391004	-6.1447	5.371242	4.105029	5.351969	5.283746
CACNA1D	0.57961	0.664276	2.48178	0.0511354	0.152613	-4.66811	0.5966012	0.1523418	0.8766673	1.0314948
PLP1	0.579581	2.74902	2.70081	0.0386135	0.127561	-4.37022	2.506834	2.411631	2.866715	3.210912
RGS20	0.579514	1.11644	2.90831	0.0297686	0.107995	-4.09142	0.8735454	0.7798185	1.5164907	1.2959010
C16orf46	0.578941	1.41457	3.08163	0.0240696	0.0950006	-3.86197	1.100301	1.149901	1.743631	1.664452
FOXK1	0.578745	3.25592	1.17672	0.287523	0.454607	-6.36255	3.723150	2.209953	3.560136	3.530457
UBALD1	0.578591	5.40778	2.91736	0.0294369	0.107156	-4.07936	5.188532	5.048432	5.788878	5.605268
CALCOCO1	0.578548	5.66567	2.50433	0.0496642	0.14981	-4.63732	5.150636	5.602151	5.988502	5.921381
ZNF816.ZNF321P	0.578254	1.12924	2.47396	0.0516563	0.153441	-4.67879	1.0733313	0.6068848	1.4528123	1.3839119
TMEM102	0.578238	3.05799	1.86228	0.116093	0.257825	-5.51123	2.369197	3.168545	3.452940	3.241278
CCDC74B	0.578155	0.816582	2.93494	0.0288041	0.106037	-4.05595	0.6357952	0.4192133	1.1178890	1.0934294
RAI1	0.577229	4.40254	1.81641	0.123458	0.267788	-5.57234	4.539660	3.688186	4.739393	4.642911
C15orf62	0.577201	1.42515	2.38314	0.0581395	0.165862	-4.80298	1.3892981	0.8837999	1.6606150	1.7668853
C14orf159	0.577126	2.31289	2.73618	0.0369231	0.123897	-4.32243	2.190278	1.858369	2.606897	2.596003
TMEM154	0.577014	1.96933	2.56638	0.0458455	0.142715	-4.55272	1.850225	1.511423	2.132885	2.382790
PHLDA3	0.576969	7.1232	1.77059	0.131282	0.277815	-5.63302	6.398949	7.270481	7.501365	7.322004
SLC15A3	0.576672	0.39945	3.09757	0.0236093	0.0939667	-3.84106	0.1077203	0.1145085	0.7081860	0.6673861
SLC23A1	0.576553	0.530699	2.93863	0.028673	0.105669	-4.05103	0.3332889	0.1515567	0.8715014	0.7664495
KIAA0319L	0.576355	4.71619	3.00853	0.0263121	0.100381	-3.95832	4.385813	4.470213	5.069819	4.938918
DNM3	0.576218	0.719561	3.0241	0.0258158	0.0992583	-3.93775	0.4140548	0.4488490	0.9393068	1.0760337
CASP8	0.576017	3.7625	2.3829	0.058158	0.165862	-4.80331	3.731501	3.217479	4.046082	4.054932
RDH10	0.575966	2.34133	1.96991	0.100506	0.23477	-5.36661	2.423980	1.682719	2.570920	2.687709
SLC12A8	0.575929	0.411862	3.07472	0.0242723	0.0953971	-3.87106	0.1440254	0.1037692	0.6651874	0.7344642
RDH5	0.575603	3.76661	2.27515	0.0669909	0.181538	-4.9508	3.195304	3.762322	4.021445	4.087387
STARD10	0.575544	2.55172	2.25421	0.0688663	0.185028	-4.97946	2.004538	2.523354	2.971528	2.707451
BEX1	0.575092	1.13177	2.33056	0.062284	0.174051	-4.87495	0.6073801	1.0810756	1.2898401	1.5487998
IFNB1	0.574324	0.32089	2.98813	0.0269783	0.10199	-3.98532	0.06745519	0.00000000	0.53326761	0.68283523
SYNM	0.574306	1.78994	2.02611	0.0932336	0.223314	-5.29054	1.857537	1.148038	2.104161	2.050025
FAM127C	0.574202	2.52389	1.74864	0.135203	0.28275	-5.66193	2.683461	1.790124	2.865327	2.756661
ZMYM3	0.574161	3.32323	2.97199	0.0275185	0.103108	-4.00672	3.097240	2.975057	3.673951	3.546666
CXorf65	0.573971	0.596933	3.01411	0.0261329	0.0999664	-3.95094	0.2454099	0.3744859	0.8576362	0.9102019
TREX2	0.573893	1.5313	2.94079	0.0285967	0.10554	-4.04816	1.228175	1.260524	1.720155	1.916329
FOXC1	0.573704	2.13454	2.40972	0.0561567	0.16207	-4.76661	2.094021	1.601348	2.444968	2.397810
PRR9	0.57329	0.286645	3.08059	0.0241	0.0950735	-3.86334	0.0000000	0.0000000	0.5544779	0.5921022
TPCN1	0.573167	3.70979	3.01747	0.0260259	0.0997359	-3.94651	3.467906	3.378507	4.044908	3.947840
PTPDC1	0.572991	3.0396	2.01233	0.0949646	0.226094	-5.30921	3.080272	2.425939	3.179260	3.472933
TSPYL1	0.572862	4.04788	2.17992	0.0759753	0.196198	-5.08105	4.069124	3.453772	4.361682	4.306938
DISP2	0.572776	0.909705	2.79868	0.0341292	0.11799	-4.23823	0.760770	0.485864	1.157509	1.234677
NRP2	0.572476	4.47039	2.3771	0.0586006	0.166883	-4.81125	4.436241	3.932072	4.793092	4.720174
INPP5E	0.572333	3.94728	2.08416	0.0862866	0.213059	-5.21166	3.992027	3.330191	4.292162	4.174721
IGFLR1	0.571774	1.23776	2.99566	0.0267304	0.101433	-3.97536	0.9956662	0.9080804	1.4653260	1.5819695
HOXC13	0.571377	4.25687	2.72608	0.0373976	0.124965	-4.33607	3.819181	4.123177	4.596647	4.488464
TRIM47	0.57076	4.40346	3.05643	0.0248178	0.0967887	-3.89511	4.102920	4.133237	4.716872	4.660804
SHROOM1	0.570636	2.21062	2.17975	0.0759927	0.196203	-5.08128	2.225004	1.625605	2.560325	2.431556
SRRM2	0.570462	5.93976	0.815553	0.44849	0.603334	-6.7184	6.775114	4.533940	6.221297	6.228682
FAM90A1	0.570065	1.65879	2.70839	0.0382445	0.127031	-4.35997	1.448636	1.298887	2.090281	1.797372
TRAK1	0.569986	2.73093	2.16793	0.0771927	0.198181	-5.09742	2.752785	2.139095	3.053926	2.977928
RGL3	0.569933	1.52323	2.45657	0.0528357	0.155757	-4.70255	1.462111	1.014420	1.751228	1.865169
RBM38	0.569397	3.94835	2.54332	0.0472265	0.145456	-4.58414	3.462390	3.864907	4.284232	4.181859
CMAS	0.56924	4.06017	2.88637	0.0305899	0.109892	-4.1207	3.880627	3.670470	4.311909	4.377669
SKI	0.56922	4.92839	1.39028	0.21788	0.383805	-6.11568	5.246608	4.040944	5.277730	5.148262
KIAA0226L	0.569213	1.68908	3.00324	0.0264831	0.100854	-3.96532	1.466809	1.342148	1.968013	1.979370
GCH1	0.569108	1.70778	2.58431	0.044802	0.140252	-4.52832	1.615693	1.230753	1.952466	2.032196
IGF2BP2	0.568859	4.80401	1.96359	0.10136	0.236014	-5.37514	4.888496	4.150670	5.069055	5.107830
ANO10	0.568707	3.52746	2.71544	0.0379043	0.126179	-4.35044	3.083739	3.402475	3.790766	3.832862
PHLDB1	0.568696	4.76405	2.74455	0.0365351	0.123067	-4.31114	4.342327	4.617085	5.114800	4.982004
DACT3	0.568626	0.451527	2.93474	0.0288112	0.106037	-4.05622	0.2091874	0.1252415	0.8172411	0.6544400
ZNF445	0.568245	1.73936	1.81259	0.124093	0.268263	-5.57742	1.867437	1.043042	1.944740	2.102230
VASH1	0.568038	2.06934	2.8855	0.0306231	0.10994	-4.12187	1.849918	1.720718	2.440311	2.266403
SMARCAL1	0.567842	2.72367	3.01203	0.0261997	0.100175	-3.9537	2.387159	2.492349	2.997678	3.017514
C17orf67	0.567234	1.34281	2.85689	0.0317329	0.112535	-4.16013	0.9989649	1.1194216	1.7261865	1.5266687
PCDHA6	0.566444	1.94795	2.75025	0.036273	0.122584	-4.30344	1.810142	1.519314	2.257859	2.204485
INHA	0.566364	1.71399	2.44328	0.0537554	0.15763	-4.72071	1.630894	1.230715	2.111451	1.882885
HOXA1	0.566165	2.70835	2.9827	0.0271588	0.102301	-3.99252	2.481942	2.368601	3.023098	2.959775
PPFIA4	0.565247	0.836691	2.9511	0.0282354	0.104781	-4.03446	0.5907483	0.5173861	1.1877327	1.0508959
ZFP64	0.565201	3.08059	2.61902	0.0428531	0.136017	-4.48112	2.980229	2.615759	3.373858	3.352531
NAGS	0.564844	2.24704	1.59472	0.166131	0.322038	-5.86156	1.465844	2.463384	2.578121	2.480794
TRMT2B	0.564842	3.06319	3.00944	0.0262827	0.100329	-3.95712	2.736686	2.824858	3.352951	3.338277
MPP1	0.564779	1.8701	2.94651	0.0283956	0.105131	-4.04056	1.617102	1.558314	2.225360	2.079615
NMUR2	0.564118	0.400935	2.80997	0.0336494	0.116868	-4.22306	0.2377508	0.0000000	0.6396238	0.7263639
FAM193A	0.563341	3.08966	1.273	0.253976	0.420924	-6.254	3.475339	2.140649	3.382394	3.360276
RABGGTB	0.563251	0.938949	2.84794	0.0320891	0.113108	-4.17212	0.7678727	0.5467739	1.1979837	1.2431644
ZNF671	0.563235	2.89103	2.99276	0.0268254	0.101582	-3.97919	2.659637	2.559187	3.170858	3.174435
PARP2	0.563166	4.22687	1.80862	0.124754	0.26903	-5.58268	4.359910	3.530674	4.485250	4.531666
PALLD	0.563134	2.05012	1.50945	0.186111	0.346641	-5.96931	2.303230	1.233869	2.275471	2.387895
TAMM41	0.562962	3.04187	1.06056	0.333052	0.49802	-6.48657	3.586589	1.934197	3.311225	3.335485
ID1	0.562726	6.80875	1.77597	0.130337	0.276548	-5.6259	6.121200	6.933564	7.220350	6.959866
SRXN1	0.562251	6.30729	2.15759	0.0782597	0.200157	-5.11155	5.728226	6.324113	6.647305	6.529535
PCDHB7	0.562012	1.99022	2.91454	0.02954	0.10747	-4.08312	1.774625	1.643807	2.327091	2.215366
CSAD	0.56197	2.33943	1.28385	0.250422	0.41766	-6.24147	2.715454	1.401442	2.574294	2.666543
MESP1	0.561814	3.42817	1.54655	0.177152	0.335518	-5.92272	2.664524	3.629996	3.899024	3.519124
ZNF488	0.560523	0.689898	2.68835	0.039229	0.128763	-4.38708	0.3851269	0.4341468	1.1256055	0.8147147
ING1	0.560362	3.18924	2.98268	0.0271592	0.102301	-3.99254	2.923426	2.894687	3.424927	3.513912
ARPC1B	0.559542	6.89389	1.47734	0.194214	0.356427	-6.00927	6.073737	7.154502	7.267564	7.079759
MAVS	0.559511	4.91592	1.70454	0.143436	0.29321	-5.71972	5.083040	4.189282	5.246093	5.145253
NUDT19	0.55936	3.96153	1.50997	0.185983	0.346566	-5.96866	4.212055	3.151637	4.291477	4.190935
TUBB6	0.559129	5.8998	1.82337	0.122311	0.266368	-5.56309	5.218181	6.022297	6.231532	6.127204
HUWE1	0.558789	6.01324	1.15156	0.296905	0.463706	-6.39009	6.478310	4.989383	6.266689	6.318583
FRAT1	0.558465	2.39096	2.29808	0.0649987	0.178332	-4.91941	1.881810	2.341650	2.792381	2.548009
CNOT11	0.558272	4.03417	2.65484	0.0409373	0.132436	-4.43249	3.915128	3.594934	4.347879	4.278726
LHFP	0.558056	3.05523	2.13662	0.0804692	0.203972	-5.14017	3.081312	2.471093	3.335504	3.333013
USP18	0.557849	2.02764	1.80808	0.124844	0.269135	-5.5834	1.350064	2.147377	2.399556	2.213583
MFSD9	0.557774	2.1001	2.95223	0.0281961	0.104665	-4.03296	1.852311	1.790124	2.427191	2.330791
APLP2	0.55747	6.0964	2.58596	0.0447068	0.140056	-4.52606	5.640483	5.994852	6.415806	6.334468
SEMA4D	0.557105	1.52136	2.68988	0.0391528	0.128645	-4.38501	1.375549	1.110060	1.874398	1.725422
SNX27	0.557099	3.60976	1.46666	0.196983	0.359568	-6.02248	3.881774	2.780644	3.888692	3.887924
RPS10	0.557039	3.31682	1.32514	0.237305	0.4032	-6.19327	2.411689	3.664918	3.593239	3.597447
ADIG	0.55701	0.278505	2.73334	0.037056	0.124099	-4.32627	0.0000000	0.0000000	0.6962737	0.4177463
RFX5	0.556828	5.97799	2.5747	0.0453579	0.141542	-4.54139	5.521408	5.877750	6.302570	6.210245
GJD3	0.556673	1.30659	2.77067	0.0353518	0.120715	-4.27592	0.923132	1.133381	1.656616	1.513243
RMI2	0.556639	4.81545	2.61971	0.042815	0.136017	-4.48017	4.687147	4.387114	5.176750	5.010789
SCAF1	0.556126	5.76867	2.41303	0.0559152	0.161628	-4.76208	5.698053	5.283166	6.138161	5.955311
ZNF101	0.556036	1.94535	1.88534	0.112559	0.252528	-5.48038	2.047976	1.286687	2.227029	2.219705
TMEM108	0.555882	0.573723	2.95685	0.0280359	0.104383	-4.02681	0.3411821	0.2503822	0.8356808	0.8676468
PPIL2	0.555847	3.51102	2.51863	0.0487551	0.148127	-4.61781	3.420498	3.045694	3.724944	3.852943
[truncated: 10,789 more rows]

## Sheet: Table S4
Cell Lines	Apoptotic Index	SMITH_TERT_TARGETS_UP	KANG_IMMORTALIZED_BY_TERT_UP	BIOCARTA_TEL_PATHWAY	PACKAGING_OF_TELOMERE_ENDS	TELOMERE_MAINTENANCE	DAIRKEE_TERT_TARGETS_UP	GO_TELOMERE_MAINTENANCE	GO_TELOMERASE_ACTIVITY	ROETH_TERT_TARGETS_UP	PID_TELOMERASE_PATHWAY	LINDVALL_IMMORTALIZED_BY_TERT_UP
UACC257	15.3837	0.707671	0.0685238	0.642862	0.319152	0.659844	0.709089	0.724025	0.483765	-0.00615456	0.665471	0.442633
HS695T	10.096	0.699957	0.205624	0.627994	0.294065	0.650833	0.689173	0.761303	0.607645	0.03658	0.613612	0.604241
A375	48.6816	0.74231	0.179217	0.601828	0.156967	0.61387	0.743921	0.790971	0.60537	0.306704	0.654084	0.507313
A2058	3.75895	0.75791	0.220337	0.67199	0.156459	0.610488	0.706268	0.757493	0.550952	0.401329	0.663265	0.496958
RPMI7951	6.53236	0.747465	0.310818	0.523305	0.215133	0.593039	0.677099	0.758031	0.593183	0.607428	0.670667	0.646039
LOXIMVI	7.67051	0.825166	0.238335	0.71661	0.145511	0.591841	0.733339	0.790195	0.563009	0.435674	0.69735	0.406002
MALME3M	2.34081	0.663475	0.159496	0.596199	0.267043	0.582417	0.685399	0.724844	0.503668	0.289883	0.594132	0.563894
SKMEL2	3.52052	0.677768	0.116493	0.614561	0.0662152	0.493847	0.655407	0.733481	0.506984	0.371037	0.628062	0.540084
SKMEL30	1.93204	0.706648	0.0497362	0.613408	0.084638	0.567989	0.689822	0.729755	0.525735	0.714656	0.642736	0.477275
UACC62	1.74212	0.716793	0.123388	0.577986	0.132755	0.564765	0.702349	0.738712	0.52246	0.186631	0.638672	0.479283
WM266-4	1.09489	0.665046	0.163963	0.629008	0.136403	0.562967	0.699014	0.741528	0.514868	0.570291	0.650601	0.525745
WM115	2.07185	0.705275	0.21449	0.569721	0.237757	0.559604	0.687074	0.725878	0.504465	0.275503	0.656816	0.546204
WM793	2.37466	0.779809	0.38132	0.613404	0.127055	0.546339	0.669194	0.722765	0.561931	0.512256	0.694157	0.619159
WM88	2.35788	0.679968	0.105045	0.604221	0.207499	0.542961	0.644361	0.716605	0.50142	0.251819	0.603464	0.523965
MEWO	1.86552	0.700036	0.076296	0.635788	0.101893	0.536935	0.650077	0.749145	0.540433	0.215746	0.627984	0.493727
HS294T	4.31967	0.723093	0.265363	0.577804	0.154301	0.536878	0.728472	0.716202	0.482383	0.597829	0.594864	0.649635
WM1799	0.962779	0.696034	0.205364	0.666356	0.0901908	0.528751	0.636086	0.749718	0.517733	0.144266	0.666201	0.544872
SKMEL28	0.833333	0.677768	0.116493	0.614561	0.0662152	0.493847	0.655407	0.733481	0.506984	0.371037	0.628062	0.540084

## Sheet: Table S5
SYMBOL	logFC	AveExpr	t	P.Value	adj.P.Val	B	A375.48h.Ctrl.1	A375.48h.Ctrl.2	A375.48h.6dG.5uM.1	A375.48h.6dG.5uM.2
PAR-R-C	3.26456	1.54979	28.6191	4.3394e-06	0.000188454	5.24967	-0.15335011	-0.01162361	3.31677997	3.04737012
Histone-H3-R-V	3.10135	1.46664	62.1131	1.54077e-07	4.68394e-05	8.75576	-0.07377164	-0.09430309	3.03613243	2.99848843
H2AX_pS140-M-C	2.67296	1.40308	49.1404	4.23151e-07	6.43189e-05	7.78134	0.07911630	0.05407662	2.70338504	2.77572265
Cox-IV-R-V	1.95328	0.278332	21.7493	1.40961e-05	0.000364751	3.8785	-0.7630235	-0.6335956	1.1638602	1.3460859
Caspase-7-cleaved-R-C	1.81965	0.864655	32.5739	2.48697e-06	0.000151559	5.88138	-0.06924864	-0.02109216	1.80961742	1.73934501
Akt_pS473-R-V	1.61989	-0.0284723	23.6694	9.80796e-06	0.000331291	4.30468	-0.8929598	-0.7838731	0.8285234	0.7344203
Porin-M-V	1.32318	-0.196166	13.0428	0.000124535	0.00113796	1.27235	-0.9796958	-0.7358170	0.5146817	0.4161679
Akt_pT308-R-V	1.31531	-0.18845	20.233	1.92088e-05	0.000417105	3.51259	-0.9099898	-0.7822161	0.4582851	0.4801220
GSK-3a-b_pS21_S9-R-V	1.28799	0.134181	17.3915	3.6673e-05	0.00055743	2.74248	-0.5852640	-0.4343645	0.8131780	0.7431752
DM-K9-Histone-H3-R-C	1.19561	0.403665	21.642	1.43981e-05	0.000364751	3.8535	-0.2261193	-0.1621626	1.0268408	0.9761001
p16INK4a-R-V	1.11624	-0.60139	9.25964	0.000523143	0.00260714	-0.465337	-1.2881265	-1.0308974	0.0562691	-0.1428033
BiP-GRP78-M-C	1.05985	0.0665191	21.224	1.56527e-05	0.000366032	3.75487	-0.4567338	-0.4700818	0.5760401	0.6168520
c-Jun_pS73-R-V	1.03962	0.505298	17.8752	3.26215e-05	0.000537304	2.88238	-0.024920895	-0.004104645	1.072769595	0.977447850
DM-Histone-H3-R-V	0.934574	0.53385	14.7739	7.34395e-05	0.00090299	1.90917	0.01800344	0.11512177	1.03799127	0.96428268
U-Histone-H2B-R-C	0.905484	0.349621	14.551	7.83378e-05	0.000915949	1.83144	-0.16131440	-0.04492653	0.80948370	0.79524271
HSP27_pS82-R-V	0.852755	-0.417409	17.7542	3.35815e-05	0.000537304	2.84773	-0.845043445	-0.842529829	0.001458102	0.016479469
Creb-R-C	0.836797	-0.303729	6.77505	0.0018714	0.00618377	-2.00875	-0.55637834	-0.88787767	0.09150127	0.13783678
AMPKa_pT172-R-C	0.796535	0.189916	4.41269	0.00973963	0.0209989	-3.98894	-0.1760176	-0.2406847	0.8419020	0.3344659
GSK-3a-b-M-V	0.778424	-0.0781502	14.2406	8.58416e-05	0.000930477	1.72124	-0.4350974	-0.4996271	0.3331291	0.2889947
S6-M-V	0.765754	-0.128547	6.44216	0.00228799	0.00717062	-2.25149	-0.3728542	-0.6499934	0.3341899	0.1744708
VHL-EPPK1-M-C	0.731181	-0.340946	3.21725	0.0290176	0.0531406	-5.27241	-1.031727652	-0.381344408	0.053452415	-0.004163101
Smad4-M-V	0.6985	-0.193095	11.7877	0.000190829	0.00138124	0.756379	-0.5908592	-0.4938320	0.1736012	0.1387084
HSP70-R-C	0.698444	0.0631874	14.1287	8.87626e-05	0.000930477	1.68092	-0.2715679	-0.3005009	0.4244054	0.4004132
PEA-15_pS116-R-V	0.666844	-0.0833853	5.86922	0.00330337	0.00947382	-2.69428	-0.5383473	-0.2952673	0.1596333	0.3404402
RBM15-R-V	0.661627	0.479064	4.42482	0.00964239	0.0209378	-3.97701	0.0945583	0.2019430	0.6087298	1.0110253
GATA3-M-V	0.61567	-0.152073	10.5477	0.000304194	0.0018209	0.191769	-0.5091973	-0.4106188	0.1576013	0.1539233
Cyclin-D3-M-V	0.595785	0.219827	8.40136	0.000781467	0.00354576	-0.951742	-0.001975733	-0.154156009	0.505703969	0.529734940
FRA-1-R-C	0.594815	0.509478	7.707	0.00111205	0.00422577	-1.37909	0.2313239	0.1928179	0.8938668	0.7199044
MAPK_pT202_Y204-R-V	0.58876	0.0918446	10.5113	0.000308615	0.0018209	0.174287	-0.1804364	-0.2246340	0.4231313	0.3493176
[truncated: 275 more rows]

## Sheet: Table S6
1	WM164 BR	6dG 0uM	6dG 2.5uM	6dG 5uM
[truncated: 27 more rows]

## Sheet: Table S7
SYMBOL	logFC	AveExpr	t	P.Value	adj.P.Val	B	LOXIMVI.Ctrl.72h.1	LOXIMVI.Ctrl.72h.2	LOXIMVIBR.Ctrl.96h.1_B	LOXIMVIBR.Ctrl.96h.2_B
[truncated: 305 more rows]

[truncated: 4 more sheets: Table S8, Table S9, Table S10, Table S11]
